# Supplementary material for: Integrated Transcriptomic and Proteomic Analyses of the Interaction Between Chicken Synovial Fibroblasts and Mycoplasma synoviae
Source: Front Microbiol. 2020 Apr 3;11:576. doi: 10.3389/fmicb.2020.00576 (PMC7147270; doi:10.3389/fmicb.2020.00576)
Supplement: Supplementary file 5 [file Table_4.XLSX]

## Sheet: Table S4
Supplementary Table S4. A list of DEGs in CSF with MS infection
Gene ID	Mock FPKM	Infected FPKM	log2(Infected/Mock)	q-value(Mock-vs-Infected)	p-value(Mock-vs-Infected)	Gene name	Transcripts	Nr
423079	3.843	14738.4	11.9272	0	0	HPS5	XM_015286662.2	XP_015142148.1|1.3e-69|PREDICTED: serum amyloid A protein [Gallus gallus]
395840	0	71.606	11.404	3.8156e-173	7.73321e-174	AvBD2	XM_015285091.2,NM_204992.2,NM_001201399.1	XP_015715126.1|2.0e-36|PREDICTED: antimicrobial peptide THP2 [Coturnix japonica]
396216	0.036	82.923	11.2248	0	0	CSF3	NM_205279.1	NP_990610.1|1.5e-111|myelomonocytic growth factor precursor [Gallus gallus]
396471	0.04	97.323	11.1682	0	0	LECT2	NM_205478.2	NP_990809.2|1.1e-195|myeloid protein 1 precursor [Gallus gallus]
771674	0.053	100.666	10.8767	0	0	PROK2	XM_015293233.2	XP_015148719.1|6.3e-59|PREDICTED: prokineticin-2 [Gallus gallus]
396260	2.436	4305.79	10.8054	0	0	AVD	NM_205320.1	NP_990651.1|3.0e-81|avidin precursor [Gallus gallus]
418223	0	3.38	10.5921	2.54792e-113	6.90115e-114	A4GALT	NM_001291811.1,XM_015290446.2	XP_015145932.1|3.9e-225|PREDICTED: lactosylceramide 4-alpha-galactosyltransferase isoform X1 [Gallus gallus]
395196	0.04	54.343	10.4424	0	0	IL1B	XM_015297469.1,NM_204524.1	XP_015152955.1|2.1e-149|PREDICTED: interleukin-1 beta isoform X1 [Gallus gallus]
395872	0.23	284.173	10.2995	0	0	IL8L1	BGI_novel_T002948,NM_205018.1	NP_990349.1|2.3e-51|interleukin-8 precursor [Gallus gallus]
395551	0	36.67	10.0472	7.63916e-85	2.4915e-85	CCL4	NM_001030360.2	XP_015736321.1|2.5e-52|PREDICTED: C-C motif chemokine 4 homolog [Coturnix japonica]
396137	0	2.266	9.87875	1.61751e-77	5.5781e-78	GRIA4	BGI_novel_T001039,XM_015277725.2,NM_001113186.1,XM_025146716.1,XM_025146728.1,NM_205214.2,XM_025146721.1,BGI_novel_T001038,XM_025146720.1,BGI_novel_T001040,XM_025146725.1,XM_025146719.1,XM_025146714.1,XM_025146732.1,XM_025146718.1	XP_013033582.1|0.0e+00|PREDICTED: glutamate receptor 4 isoform X4 [Anser cygnoides domesticus]
396393	24.733	22114.5	9.81818	0	0	EXFABP	NM_205422.1	NP_990753.1|4.7e-94|extracellular fatty acid-binding protein precursor [Gallus gallus]
396495	11.503	9468.79	9.69505	0	0	IL8L2	NM_205498.1	XP_021252456.1|5.1e-61|interleukin-8 [Numida meleagris]
421368	0	10.84	9.67305	2.17844e-69	8.02418e-70	BATF3	XM_419428.6,XM_004935335.3	XP_004935392.1|3.1e-60|PREDICTED: basic leucine zipper transcriptional factor ATF-like 3 isoform X2 [Gallus gallus]
428949	0	3.47	9.58816	2.80107e-66	1.06728e-66	UGT8L	XM_426504.6	XP_426504.2|0.0e+00|PREDICTED: 2-hydroxyacylsphingosine 1-beta-galactosyltransferase-like [Gallus gallus]
421177	0.02	15.023	9.57719	1.66782e-258	2.47537e-259	ELF3	XM_419257.6	XP_419257.4|3.3e-220|PREDICTED: ETS-related transcription factor Elf-3 [Gallus gallus]
395082	0.233	158.823	9.44042	0	0	CCL20	NM_204438.2	NP_989769.1|9.7e-49|C-C motif chemokine 20 precursor [Gallus gallus]
395841	0	17.436	9.43307	6.17194e-61	2.48381e-61	AvBD1	NM_204993.1	NP_990324.1|3.4e-30|gallinacin-1 alpha precursor [Gallus gallus]
427029	0	8.036	9.37896	3.57698e-59	1.47445e-59	LOC427029	XM_430469.6,XM_025145950.1	XP_015128561.1|5.8e-83|PREDICTED: uncharacterized protein LOC427029 isoform X2 [Gallus gallus]
769834	0.02	11.05	9.25552	3.05708e-216	5.29352e-217	TPBGL	XM_004939022.3	XP_004939079.2|1.2e-204|PREDICTED: trophoblast glycoprotein-like [Gallus gallus]
101750271	0.006	4.063	9.1718	5.17651e-104	1.48386e-104	LOC101750271	XM_004939926.3	XP_004939983.1|2.4e-141|PREDICTED: translation initiation factor IF-2-like isoform X2 [Gallus gallus]
395450	0	3.65	9.12326	1.79027e-51	8.10903e-52	NTM	XM_015297956.2,XM_015297952.2,XM_025143173.1,XM_015297955.2,XM_025143177.1,NM_204711.1,XM_025143176.1,XM_025143175.1,XM_015297954.2	XP_015153440.1|1.7e-203|PREDICTED: protein CEPU-1 isoform X3 [Gallus gallus]
374241	0.03	16.473	9.07869	7.51522e-196	1.40597e-196	PI15	NM_204334.1	NP_989665.1|2.2e-156|peptidase inhibitor 15 precursor [Gallus gallus]
374110	0.193	101.456	9.04579	0	0	PTGDS	NM_204259.1	NP_989590.1|6.9e-101|prostaglandin-H2 D-isomerase precursor [Gallus gallus]
419896	0.02	10.593	9.03319	0	0	SCUBE3	XM_015299004.2,BGI_novel_T008802,XM_004935034.3,XM_418021.6,XM_015299003.2,XM_015299005.2	XP_015154491.1|0.0e+00|PREDICTED: signal peptide, CUB and EGF-like domain-containing protein 3 isoform X4 [Gallus gallus]
395337	1.436	1628.52	8.8761	0	0	IL6	NM_204628.1,XM_015281283.2	XP_015136769.1|1.1e-147|PREDICTED: interleukin-6 isoform X1 [Gallus gallus]
414832	0.28	120.77	8.74596	0	0	CYP3A5	NM_001001751.2	OXB82765.1|9.9e-281|hypothetical protein H355_000463 [Colinus virginianus]
408042	0	2.27	8.6693	4.15608e-40	2.21856e-40	KRT75	NM_001001314.2	NP_001001314.2|8.0e-303|keratin 75 [Gallus gallus]
100857593	0.07	26.636	8.61051	1.99207e-224	3.33343e-225	CFD	XM_003642860.4	XP_015741844.1|1.7e-139|PREDICTED: complement factor D [Coturnix japonica]
418826	0	2.803	8.6079	9.05547e-39	4.9412e-39	OLFM4	NM_001040463.1	NP_001035553.1|1.2e-282|olfactomedin-4 precursor [Gallus gallus]
418812	0.19	74.816	8.60428	0	0	ACOD1	NM_001030821.1,XM_015275372.2,BGI_novel_T000935	NP_001025992.1|1.2e-273|cis-aconitate decarboxylase [Gallus gallus]
418923	0.083	30.74	8.49773	0	0	MTUS2	XM_015278698.2,XM_417117.5,BGI_novel_T001009,BGI_novel_T001008,XM_015278689.2	XP_417117.2|0.0e+00|PREDICTED: microtubule-associated tumor suppressor candidate 2 [Gallus gallus]
421885	0.22	68.41	8.30824	0	0	COL21A1	XM_419902.5,XM_004940463.2,XM_025149095.1	XP_015478925.1|0.0e+00|PREDICTED: collagen alpha-1(XXI) chain [Parus major]
416945	0.076	20.96	8.18471	0	0	GGT1	XM_015275447.2,XM_025155514.1,XM_025155516.1,XM_015275452.2,XM_004934343.3,XM_015275449.2,XM_025155515.1,XM_015275448.2,XM_015275453.2,XM_015275450.2,XM_015275451.2	XP_004934400.2|0.0e+00|PREDICTED: gamma-glutamyltranspeptidase 1 isoform X1 [Gallus gallus]
428870	0.006	1.773	8.16649	5.98661e-59	2.48141e-59	PLA2G4EL3	XM_426427.6	XP_426427.5|0.0e+00|PREDICTED: cytosolic phospholipase A2 epsilon-like [Gallus gallus]
BGI_novel_G000074	0	0.773	8.16115	3.04425e-30	1.91425e-30	BGI_novel_G000074	BGI_novel_T002463
427591	0	0.756	8.04666	2.29401e-28	1.48683e-28	FAM107A	XM_425164.4,XM_004944645.3	XP_004944702.1|2.9e-93|PREDICTED: protein FAM107A isoform X1 [Gallus gallus]
422654	0.626	161.776	8.02376	0	0	LOC422654	XM_420608.5	XP_420608.1|2.0e-47|PREDICTED: growth-regulated alpha protein [Gallus gallus]
395827	0.066	17.666	7.99962	0	0	CYP24A1	BGI_novel_T007923,NM_204979.1	NP_990310.1|5.3e-303|1,25-dihydroxyvitamin D(3) 24-hydroxylase, mitochondrial [Gallus gallus]
395596	0.296	65.94	7.8599	0	0	EPAS1	XM_015283619.2,XM_015283618.2,NM_204807.2	NP_990138.1|0.0e+00|endothelial PAS domain-containing protein 1 [Gallus gallus]
101752219	38.423	8750.41	7.85436	0	0	PI3	XM_004947027.3	XP_004947084.1|4.4e-40|PREDICTED: elafin [Gallus gallus]
769132	0.066	16.623	7.81597	0	0	SLCO4C1	XM_003643045.4,XM_004949307.3	XP_004949364.1|0.0e+00|PREDICTED: solute carrier organic anion transporter family member 4C1 isoform X2 [Gallus gallus]
100858412	0	2.996	7.81226	7.08772e-25	4.96952e-25	CATHB1	NM_001271172.1	NP_001258101.1|2.5e-147|cathelicidin-B1 precursor [Gallus gallus]
101752216	0	2.98	7.78478	1.70578e-24	1.20487e-24	LCN15	XM_004945724.3	XP_004945781.1|3.0e-108|PREDICTED: lipocalin-15 [Gallus gallus]
418470	0.036	7.386	7.68239	4.53868e-173	9.20813e-174	SAMSN1	NM_001006256.2	NP_001006256.2|1.6e-212|SAM domain-containing protein SAMSN-1 [Gallus gallus]
424896	0	0.38	7.53175	3.03693e-21	2.3143e-21	XXYLT1	XM_025153619.1,XM_015291599.2,XM_025153618.1	OXB83135.1|1.8e-143|hypothetical protein H355_016699 [Colinus virginianus]
414340	0	3.656	7.5106	5.41312e-21	4.15771e-21	AvBD5	NM_001001608.2	NP_001001608.2|9.6e-32|gallinacin-5 prepropeptide precursor [Gallus gallus]
395364	0.013	2.253	7.46804	2.71977e-39	1.47106e-39	PIT54	NM_207180.1	NP_997063.1|3.9e-293|PIT54 protein precursor [Gallus gallus]
100857674	0.01	1.68	7.45938	4.30618e-39	2.33628e-39	CXorf21	XM_003640512.4	XP_003640560.1|1.6e-161|PREDICTED: uncharacterized protein CXorf21 homolog [Gallus gallus]
419733	0.11	16.78	7.28982	0	0	ADAMTS15	XM_417874.6	XP_417874.2|0.0e+00|PREDICTED: A disintegrin and metalloproteinase with thrombospondin motifs 15 [Gallus gallus]
424275	0.453	78.203	7.24123	0	0	STEAP3	BGI_novel_T004599,XM_025152367.1,XM_025152366.1,XM_422122.6,XM_015289946.2,XM_004942972.3	XP_017928129.1|7.3e-271|PREDICTED: metalloreductase STEAP3 isoform X2 [Manacus vitellinus]
100857191	0	0.913	7.23409	5.82855e-18	4.86329e-18	LOC100857191	XM_003642981.4	XP_003643029.1|3.7e-52|PREDICTED: C-C motif chemokine 26-like [Gallus gallus]
418852	0.026	3.643	7.22389	5.87185e-131	1.45127e-131	LCP1	XM_015275546.2,XM_025150354.1,NM_001008440.1,XM_015275555.2	XP_015131032.1|0.0e+00|PREDICTED: plastin-2 isoform X1 [Gallus gallus]
425008	0	0.863	7.19286	1.5092e-17	1.27494e-17	SPTSSB	XM_015291674.2,XM_015291671.2,NM_001302113.1,NM_001302111.1,XM_015291672.2,BGI_novel_T005351,XM_015291673.2,BGI_novel_T005352,BGI_novel_T005350,NM_001302112.1	NP_001289041.1|1.4e-54|serine palmitoyltransferase small subunit B isoform 2 [Gallus gallus]
396241	0.38	54.98	7.17686	0	0	TF	NM_205304.1	NP_990635.1|0.0e+00|ovotransferrin precursor [Gallus gallus]
426943	0	0.953	7.17032	2.51894e-17	2.14e-17	PLIN5	XM_015300018.2,XM_015300019.2,XM_015300020.2	XP_015155506.1|6.1e-254|PREDICTED: perilipin-3 isoform X2 [Gallus gallus]
101748581	0.01	1.513	7.16098	4.75228e-157	1.0333e-157	LOC101748581	XM_025143771.1,XM_025143770.1,BGI_novel_T008775,XM_004934965.3,XM_025143772.1	XP_015154539.1|0.0e+00|PREDICTED: polymeric immunoglobulin receptor-like isoform X3 [Gallus gallus]
419051	0.186	24.26	7.05849	0	0	SLCO2B1	XM_015281021.2,BGI_novel_T001104,XM_417242.6	XP_417242.3|0.0e+00|PREDICTED: solute carrier organic anion transporter family member 2B1 isoform X1 [Gallus gallus]
418982	0.973	127.623	7.03736	0	0	MMP1	XM_417176.5	XP_021236581.1|4.2e-266|interstitial collagenase-like [Numida meleagris]
769860	0.033	4.293	6.91216	1.77688e-134	4.28088e-135	PDE4C	XM_015300159.2,BGI_novel_T009159,XM_015300155.2,XM_015300154.2,XM_015300156.2,BGI_novel_T009160,XM_015300157.2,XM_015300158.2	XP_015155644.1|0.0e+00|PREDICTED: cAMP-specific 3',5'-cyclic phosphodiesterase 4C isoform X5 [Gallus gallus]
417489	0.013	1.483	6.85252	2.85175e-27	1.89812e-27	LAT2	XM_004950518.3,BGI_novel_T007557,BGI_novel_T007556,NM_001007482.1,XM_003643584.4,XM_003643586.4,BGI_novel_T007555,XM_004950516.3	XP_003643634.3|2.0e-130|PREDICTED: linker for activation of T-cells family member 2 isoform X1 [Gallus gallus]
417039	0	0.636	6.83923	2.27063e-14	2.12587e-14	IL4I1	NM_001099351.3	NP_001092821.2|5.9e-306|L-amino-acid oxidase precursor [Gallus gallus]
428858	0	0.096	6.83923	2.27063e-14	2.12587e-14	SHANK2	XM_015286889.2,XM_015286890.2,XM_015286884.2,XM_025151120.1,XM_015286883.2,XM_015286888.2,XM_015286885.2,XM_015286882.2,XM_015286886.2,XM_015286881.2,XM_015286887.2,XM_015286880.2	XP_015142366.1|0.0e+00|PREDICTED: SH3 and multiple ankyrin repeat domains protein 2 isoform X1 [Gallus gallus]
396218	0.13	13.206	6.71855	4.51962e-72	1.6272e-72	LYZ	NM_205281.1	NP_990612.1|4.0e-83|lysozyme C precursor [Gallus gallus]
BGI_novel_G000266	0.01	1.22	6.70478	3.26954e-48	1.56113e-48	BGI_novel_G000266	BGI_novel_T009977
418489	0.02	1.96	6.58684	2.53648e-66	9.65938e-67	GRIK1	XM_015299627.2,XM_025144972.1,XM_015299620.2,BGI_novel_T000669,XM_015299614.2	XP_015155100.1|0.0e+00|PREDICTED: glutamate receptor ionotropic, kainate 1 isoform X1 [Gallus gallus]
101750337	0	0.69	6.57619	2.17347e-12	2.19665e-12	HELT	XM_015276559.2	XP_015132045.1|2.9e-122|PREDICTED: hairy and enhancer of split-related protein HELT [Gallus gallus]
396388	0	0.313	6.57619	2.17347e-12	2.19665e-12	ACHE	XM_025146106.1	P36196.1|0.0e+00|RecName: Full=Acetylcholinesterase; Short=AChE; Flags: Precursor
100859742	0.04	3.793	6.56412	1.3322e-86	4.28678e-87	CD24	NM_001277735.1	NP_001264664.1|2.3e-40|signal transducer CD24 precursor [Gallus gallus]
426356	0	1.87	6.5106	6.1328e-12	6.29509e-12	S100A9	NM_001305151.1	NP_001292080.1|4.6e-63|protein MRP-126 [Gallus gallus]
771397	0.013	1.056	6.49373	5.61089e-22	4.19998e-22	NKX2-8	XM_003641360.4,XM_015287656.2	XP_015143142.1|1.2e-100|PREDICTED: homeobox protein Nkx-2.8 isoform X2 [Gallus gallus]
772259	0.006	0.95	6.47666	8.36036e-42	4.36205e-42	LHX6	XM_015279838.2,XM_015279837.1	XP_015135323.1|1.6e-257|PREDICTED: LIM/homeobox protein Lhx6 isoform X1 [Gallus gallus]
396204	0.786	68.25	6.44048	0	0	NOV	NM_205268.1	NP_990599.1|9.0e-220|protein NOV precursor [Gallus gallus]
422219	3.913	326.96	6.43272	0	0	IL13RA2	NM_001048078.1,XM_015278228.2,XM_015278229.2,XM_015278230.2,BGI_novel_T002605	XP_015133716.1|8.0e-225|PREDICTED: interleukin-13 receptor subunit alpha-2 isoform X2 [Gallus gallus]
417677	0.06	2.926	6.42863	2.14802e-79	7.26472e-80	XAF1	BGI_novel_T007713,XM_004946817.3,XM_004946813.3,XM_004946816.3,XM_004946815.3,XM_004946814.2,XM_015296204.2,XM_015296201.2,XM_415922.5,XM_015296202.2,XM_004946810.3,XM_004946811.3,XM_025142026.1,XM_004946809.3,XM_004946808.3	XP_004946865.2|2.7e-225|PREDICTED: XIAP-associated factor 1 isoform X1 [Gallus gallus]
100859008	0	0.55	6.36974	4.9683e-11	5.31045e-11	RASSF10	XM_015286422.2	XP_015141908.1|5.6e-249|PREDICTED: ras association domain-containing protein 10 [Gallus gallus]
769256	0.44	34.346	6.29417	0	0	IL17REL	XM_025153841.1,XM_015273696.2,XM_015273739.2,XM_001232492.5	XP_001232493.4|6.2e-276|PREDICTED: putative interleukin-17 receptor E-like isoform X3 [Gallus gallus]
421702	12.056	981.526	6.2832	0	0	VNN1	NM_001039288.2,BGI_novel_T002318,BGI_novel_T002316	NP_001034377.1|1.1e-294|pantetheinase precursor [Gallus gallus]
100858066	0.033	2.33	6.26425	1.48089e-36	8.36996e-37	LRG1	XM_003642865.4	XP_003642913.1|4.6e-210|PREDICTED: leucine-rich alpha-2-glycoprotein [Gallus gallus]
431090	0.006	0.54	6.26425	1.48089e-36	8.36996e-37	GRIN2C	BGI_novel_T007477,XM_015295464.2,XM_015295465.2,XM_025141839.1,XM_025141838.1,XM_015295466.2	XP_015150952.1|0.0e+00|PREDICTED: glutamate receptor ionotropic, NMDA 2C isoform X3 [Gallus gallus]
424790	0.046	3.116	6.20846	7.73249e-69	2.86109e-69	DAW1	XM_422608.6,BGI_novel_T005205,XM_025153424.1	XP_013013237.1|2.0e-173|PREDICTED: dynein assembly factor with WDR repeat domains 1 isoform X2 [Cavia porcellus]
101750711	0	0.263	6.17815	6.5939e-10	7.42494e-10	LOC101750711	XM_004945962.3	XP_004946019.1|3.5e-185|PREDICTED: uncharacterized protein LOC101750711 [Gallus gallus]
427223	0	0.963	6.1718	7.15082e-10	8.06394e-10	RLN3	NM_001113200.1	NP_001106671.1|2.8e-106|relaxin 3 precursor [Gallus gallus]
112532898	0	0.496	6.12873	1.2276e-09	1.40044e-09	LOC112532898	XM_025153106.1
414875	0	1.02	6.12873	1.2276e-09	1.40044e-09	AvBD8	XM_015285097.2,NM_001001781.1	XP_015140583.1|1.4e-51|PREDICTED: gallinacin-8 isoform X1 [Gallus gallus]
418748	0	0.12	6.12873	1.2276e-09	1.40044e-09	MCF2L	XM_015277850.2,XM_015277845.2,XM_015277848.2,XM_015277842.2,XM_015277846.1,XM_015277853.2,XM_015277844.1,XM_015277854.2,XM_025150076.1,NM_001252063.1,XM_015277843.2,XM_015277849.2,XM_025150075.1,XM_015277847.2	XP_019465546.1|0.0e+00|PREDICTED: guanine nucleotide exchange factor DBS isoform X5 [Meleagris gallopavo]
420193	0.006	0.363	6.12873	1.57106e-33	9.25191e-34	IL7	BGI_novel_T001765,NM_001037833.1,XM_015282790.2	XP_015138276.1|1.4e-100|PREDICTED: interleukin 7 isoform X1 [Gallus gallus]
426652	0.03	2.123	6.12873	3.56727e-97	1.07225e-97	ACTBL2L	BGI_novel_T003504,BGI_novel_T003505,XM_025151131.1,XM_424279.6	XP_013050203.1|2.7e-218|PREDICTED: actin, alpha skeletal muscle B-like [Anser cygnoides domesticus]
417464	0	3.826	6.08434	2.11631e-09	2.4389e-09	CCLL4	NM_001045831.1	NP_001039296.1|3.2e-49|chemokine-like ligand 4 precursor [Gallus gallus]
428987	0.006	0.35	6.08434	3.82583e-17	3.27018e-17	PLPP4	XM_426544.6,XM_025151904.1	XP_005515485.2|7.5e-151|phospholipid phosphatase 4, partial [Columba livia]
424301	0	0.04	6.03854	3.65275e-09	4.25965e-09	LRP1B	XM_004943007.3,XM_422146.6,XM_015289890.2,XM_015289891.2	XP_019327701.1|0.0e+00|PREDICTED: low-density lipoprotein receptor-related protein 1B [Aptenodytes forsteri]
771061	2.073	135.93	6.01136	0	0	SCARA5	XM_004935852.2,XM_025149126.1,XM_001234365.4,BGI_novel_T002507	XP_009465670.1|1.3e-263|PREDICTED: scavenger receptor class A member 5 [Nipponia nippon]
768536	1.17	74.123	5.99203	0	0	TAAR1	XM_015284165.2	XP_015139651.1|1.1e-191|PREDICTED: trace amine-associated receptor 1 [Gallus gallus]
420896	4.3	271.093	5.98627	0	0	SERPINB2	XM_418982.6	XP_418982.1|1.3e-234|PREDICTED: serpin B10 [Gallus gallus]
416148	0.033	2.173	5.9651	7.01954e-187	1.35701e-187	PPARGC1B	BGI_novel_T006223,XM_025155027.1	XP_015149199.1|0.0e+00|PREDICTED: peroxisome proliferator-activated receptor gamma coactivator 1-beta isoform X1 [Gallus gallus]
422906	0.01	0.59	5.94232	1.00903e-15	9.03798e-16	TMED11	NM_001308001.1	NP_001294930.1|5.7e-119|transmembrane emp24 domain-containing protein 11 precursor [Gallus gallus]
770947	0.003	0.286	5.8657	5.30174e-15	4.84251e-15	FAM167A	XM_001233099.5	XP_015715355.1|8.8e-113|PREDICTED: protein FAM167A [Coturnix japonica]
418981	2.173	123.15	5.8317	0	0	MMP10	NM_001278089.1	NP_001265018.1|1.9e-301|stromelysin-1 precursor [Gallus gallus]
418200	0.01	0.52	5.76616	5.63584e-39	3.06587e-39	ABCC9	XM_015291589.2,XM_015291558.2,XM_015291564.2,XM_015291593.2,XM_015291583.2,XM_015291598.2,XM_015291576.2,XM_015291577.2,XM_015291572.2	XP_015147075.1|0.0e+00|PREDICTED: ATP-binding cassette sub-family C member 9 isoform X2 [Gallus gallus]
101751695	0.003	0.253	5.7282	8.56813e-14	8.18574e-14	MAMDC4	XM_025141424.1,XM_015279615.2	XP_015135101.1|0.0e+00|PREDICTED: apical endosomal glycoprotein [Gallus gallus]
427868	0	0.033	5.7282	1.02267e-07	1.29059e-07	TRHDE	XM_015283004.2	XP_015138490.1|0.0e+00|PREDICTED: LOW QUALITY PROTEIN: thyrotropin-releasing hormone-degrading ectoenzyme [Gallus gallus]
395561	0.073	3.88	5.70493	3.23962e-61	1.29768e-61	WNT4	NM_204783.1	NP_990114.1|2.0e-208|protein Wnt-4 precursor [Gallus gallus]
422045	0	0.353	5.6693	1.80187e-07	2.30576e-07	CRISP2	XM_004935913.3	XP_004935970.1|1.1e-153|PREDICTED: serotriflin [Gallus gallus]
101749540	0	0.19	5.6079	3.18861e-07	4.13465e-07	LOC101749540	XM_015293982.2,XM_025154924.1	XP_021266112.1|1.9e-82|uncharacterized protein LOC110405262 isoform X1 [Numida meleagris]
395220	0	0.683	5.6079	3.18861e-07	4.13465e-07	ORM1	NM_204541.2	NP_989872.1|1.1e-112|orosomucoid 1 (ovoglycoprotein) precursor [Gallus gallus]
414870	0.003	0.166	5.6079	8.12036e-13	8.08712e-13	SLC5A7	XM_015277834.2,NM_001001763.1	XP_021269874.1|0.0e+00|high affinity choline transporter 1 [Numida meleagris]
BGI_novel_G000180	0.16	7.666	5.60219	0	0	BGI_novel_G000180	BGI_novel_T007067
395973	0.006	0.266	5.57619	1.43455e-12	1.43971e-12	KCNJ8	XM_004937989.3,NM_001293287.1	NP_001280216.1|4.4e-238|ATP-sensitive inward rectifier potassium channel 8 [Gallus gallus]
429084	3.89	183.763	5.56596	0	0	F3	XM_426640.4	XP_426640.2|6.9e-161|PREDICTED: tissue factor [Gallus gallus]
395715	0.326	9.676	5.55478	0	0	SERPINB10B	BGI_novel_T001553,NM_204897.1,BGI_novel_T001555,XM_015282165.2,XM_015282163.2,BGI_novel_T001552,BGI_novel_T001554	NP_990228.1|2.1e-232|heterochromatin-associated protein MENT [Gallus gallus]
419852	1.57	68.22	5.54939	0	0	CD55	XM_417981.6,XM_015299057.2,BGI_novel_T008776	XP_015154543.1|1.1e-170|PREDICTED: complement decay-accelerating factor isoform X2 [Gallus gallus]
373897	0	0.166	5.54377	5.63834e-07	7.44247e-07	MUSK	NM_204108.1	NP_989439.1|0.0e+00|muscle, skeletal receptor tyrosine protein kinase precursor [Gallus gallus]
395708	0	0.37	5.54377	5.63834e-07	7.44247e-07	LYG2	NM_001001470.1,XM_015277690.2	XP_015133176.1|3.5e-119|PREDICTED: lysozyme g isoform X1 [Gallus gallus]
427633	0	0.18	5.54377	5.63834e-07	7.44247e-07	DRD1	NM_001144848.2,XM_015293823.2	XP_015149308.1|8.1e-285|PREDICTED: D(1A) dopamine receptor isoform X1 [Gallus gallus]
418998	0.23	11.153	5.54104	0	0	HEPHL1	XM_015280492.2,BGI_novel_T001055,XM_025146895.1,BGI_novel_T001058,XM_025146896.1,BGI_novel_T001057,BGI_novel_T001056	XP_015135978.1|0.0e+00|PREDICTED: hephaestin-like protein 1 isoform X1 [Gallus gallus]
395873	1.736	79.743	5.51658	0	0	K123	XM_015289921.2,XM_025145275.1,XM_015289879.2,NM_205019.2	NP_990350.1|7.8e-163|K123 protein precursor [Gallus gallus]
772254	1.313	61.673	5.48913	0	0	TMEM196	XM_004939341.3,XM_001234721.5,XM_004939340.3,XM_015281865.2,XM_025147412.1,XM_004939336.3,XM_025147413.1,XM_015281867.2	XP_015137353.1|5.7e-85|PREDICTED: transmembrane protein 196 isoform X6 [Gallus gallus]
427802	1.213	53.18	5.47004	4.88952e-264	7.10453e-265	CYGB	NM_001008789.1	NP_001008789.1|2.0e-97|cytoglobin [Gallus gallus]
417171	0.126	5.38	5.40927	1.42942e-233	2.30873e-234	NTNG2	XM_015279758.2,XM_015279757.1,XM_015279756.1,XM_025141530.1,XM_015279759.2,XM_025141531.1,XM_025141532.1	XP_015135243.1|0.0e+00|PREDICTED: netrin-G2 isoform X2 [Gallus gallus]
425998	0	0.19	5.40627	1.79165e-06	2.44053e-06	MRGPRH	XM_025151273.1,XM_423677.4	XP_423677.1|1.4e-179|PREDICTED: proto-oncogene Mas [Gallus gallus]
374268	0.093	3.776	5.38671	2.84794e-125	7.25202e-126	PIK3AP1	XM_025151452.1,NM_204350.1,BGI_novel_T004086,XM_015288347.2,XM_025151453.1,XM_015288344.1	XP_015143830.1|0.0e+00|PREDICTED: phosphoinositide 3-kinase adapter protein 1 isoform X1 [Gallus gallus]
771337	0.116	4.796	5.38446	4.69555e-144	1.08441e-144	SOX7	XM_001234627.5	XP_001234628.1|1.7e-229|PREDICTED: transcription factor SOX-7 [Gallus gallus]
395387	5.266	217.263	5.36558	0	0	MMP9	BGI_novel_T007907,NM_204667.1	NP_989998.1|0.0e+00|matrix metalloproteinase-9 precursor [Gallus gallus]
428108	0.006	0.213	5.33227	7.92514e-11	8.56977e-11	P2RY2	XM_025146950.1,XM_004938999.3,XM_015280994.2,XM_004938998.3,XM_025146951.1	XP_004939055.2|2.9e-206|PREDICTED: P2Y purinoceptor 2 [Gallus gallus]
395876	0.203	7.926	5.31956	4.4556e-219	7.5762e-220	F10	NM_205022.1,XM_015277827.2	NP_990353.1|1.4e-271|coagulation factor X precursor [Gallus gallus]
395706	26.306	1000.78	5.2579	0	0	SCD	NM_204890.1	XP_003208050.1|1.2e-202|PREDICTED: acyl-CoA desaturase [Meleagris gallopavo]
422460	0	0.053	5.25426	5.79419e-06	8.1408e-06	HHIP	XM_015276718.2,XM_015276719.2	XP_015132205.1|0.0e+00|PREDICTED: hedgehog-interacting protein isoform X2 [Gallus gallus]
415686	0	0.216	5.1718	1.04496e-05	1.49705e-05	MLKL	XM_015279230.2	XP_015134716.1|4.1e-285|PREDICTED: mixed lineage kinase domain-like protein [Gallus gallus]
424789	0	0.056	5.1718	1.04496e-05	1.49705e-05	SPHKAP	XM_015276891.1,XM_015276890.1,NM_001177532.3,XM_015276894.2,XM_015276893.2,XM_015276888.2,XM_015276892.2,XM_015276889.2	XP_015132375.1|0.0e+00|PREDICTED: A-kinase anchor protein SPHKAP isoform X2 [Gallus gallus]
769512	0.02	0.626	5.1718	5.74314e-18	4.79083e-18	LOC769512	XM_001232795.5,XM_015278095.2	XP_001232796.2|1.9e-176|PREDICTED: uncharacterized protein LOC769512 [Gallus gallus]
415818	18.05	641.976	5.15105	0	0	CRISPLD2	BGI_novel_T005793,BGI_novel_T005792,XM_025154302.1	XP_414180.3|0.0e+00|PREDICTED: cysteine-rich secretory protein LCCL domain-containing 2 [Gallus gallus]
101749156	0	0.293	5.10937	1.60279e-05	2.32821e-05	TMEM74B	XM_015296472.2	XP_015151958.1|6.2e-81|PREDICTED: transmembrane protein 74B [Gallus gallus]
414341	0	0.613	5.08434	1.89412e-05	2.76636e-05	AvBD10	NM_001001609.2	NP_001001609.1|3.2e-33|gallinacin-10 preproprotein [Gallus gallus]
771179	0.036	1.27	5.08434	7.77947e-40	4.16893e-40	PLEKHN1	XM_003642525.4	XP_003642573.1|0.0e+00|PREDICTED: pleckstrin homology domain-containing family N member 1 [Gallus gallus]
431664	0.013	0.443	5.02685	6.19411e-31	3.83181e-31	RXFP3	XM_004937174.3	XP_004937231.1|5.0e-258|PREDICTED: relaxin-3 receptor 1 [Gallus gallus]
418638	0.02	0.696	5.01337	6.65344e-40	3.56135e-40	TLR7	XM_015273651.2,XM_015273642.2,NM_001011688.2,XM_015273647.2	ASU47345.1|0.0e+00|toll-like receptor 7 [Pavo cristatus]
374175	0.03	1.12	5.00188	3.03579e-66	1.15798e-66	CAMK2A	XM_015293721.2,XM_015293719.2,NM_204295.1,XM_015293720.2	XP_005147259.1|1.6e-282|PREDICTED: calcium/calmodulin-dependent protein kinase type II subunit alpha isoform X2 [Melopsittacus undulatus]
424315	78.876	2502.08	4.99466	0	0	TNFAIP6	NM_001037837.2	XP_010405498.1|2.3e-163|tumor necrosis factor-inducible gene 6 protein [Corvus cornix cornix]
373935	0	0.076	4.99123	3.45545e-05	5.1379e-05	DACH1	XM_015275219.2,NM_001199446.1,XM_015275228.2,XM_015275212.2,XM_015275195.2,XM_015275204.2,XM_015275226.2,XM_015275234.2	XP_015130720.1|0.0e+00|PREDICTED: dachshund homolog 1 isoform X6 [Gallus gallus]
422035	0	0.153	4.99123	3.45545e-05	5.1379e-05	BLK	XM_420040.6,XM_004935895.3	XP_004935952.1|2.9e-309|PREDICTED: tyrosine-protein kinase Blk isoform X1 [Gallus gallus]
107052452	1.026	32.123	4.98503	7.57343e-248	1.16183e-248	IL18BP	XM_015280902.2,XM_015280901.2,XM_015280900.2	XP_015136386.1|2.0e-77|PREDICTED: interleukin-18-binding protein isoform X1 [Gallus gallus]
423042	7.14	220.24	4.95283	0	0	ADM	XM_015286460.2	XP_015719488.1|3.8e-108|PREDICTED: ADM [Coturnix japonica]
427718	3.373	102.93	4.94768	0	0	LIF	XM_015294916.2,XM_425293.6	XP_425293.4|4.0e-125|PREDICTED: leukemia inhibitory factor isoform X1 [Gallus gallus]
416810	0.27	8.336	4.93655	0	0	TMEM132B	BGI_novel_T006705,XM_025155605.1,XM_015275628.2,XM_025155607.1,BGI_novel_T006706,XM_025155606.1,XM_025155604.1	XP_015131114.1|0.0e+00|PREDICTED: transmembrane protein 132B isoform X1 [Gallus gallus]
107051287	40.373	1194.66	4.89978	0	0	IL11	XM_025142876.1	XP_015130403.1|2.3e-109|PREDICTED: interleukin-11, partial [Gallus gallus]
100857910	0	0.216	4.89169	6.30482e-05	9.59346e-05	ARTN	XM_025153107.1,XM_015291307.2	XP_015146793.1|5.2e-140|PREDICTED: artemin [Gallus gallus]
107055419	0	0.113	4.89169	6.30482e-05	9.59346e-05	LOC107055419	XM_025145606.1	XP_015155863.1|2.7e-243|PREDICTED: LOW QUALITY PROTEIN: keratin, type II cytoskeletal 7-like [Gallus gallus]
416245	0	0.126	4.89169	6.30482e-05	9.59346e-05	NIPAL4	XM_414566.5,XM_004944917.3	XP_004944974.1|1.1e-222|PREDICTED: magnesium transporter NIPA4 isoform X2 [Gallus gallus]
422884	0.846	24.733	4.88596	0	0	TNIP2	XM_015285792.2,NM_001031166.2	NP_001026337.2|2.4e-296|TNFAIP3-interacting protein 2 [Gallus gallus]
417700	0.013	0.663	4.87875	7.36976e-28	4.82872e-28	SLC26A3	NM_001199444.2,XM_025147271.1,XM_025147274.1	NP_001186373.2|0.0e+00|chloride anion exchanger [Gallus gallus]
420737	0.01	0.336	4.85693	5.35489e-21	4.11187e-21	AOAH	XM_004939533.3,XM_004939531.3,XM_418835.5	XP_418835.3|0.0e+00|PREDICTED: acyloxyacyl hydrolase isoform X1 [Gallus gallus]
771410	0.016	0.413	4.85693	2.69568e-40	1.43618e-40	IGFN1	XM_025143745.1,XM_025143753.1,XM_025143723.1,XM_025143762.1,XM_025143736.1,XM_025143725.1,XM_025143722.1,XM_025143732.1,XM_025143750.1,XM_025143729.1,XM_025143733.1,XM_025143766.1,XM_015298864.2,XM_015298822.2,XM_025143730.1,XM_025143739.1,XM_025143721.1,XM_025143754.1,XM_025143734.1,XM_025143765.1,XM_025143741.1,XM_025143755.1,XM_025143759.1,XM_025143726.1,XM_015298862.2,XM_025143767.1,XM_025143…	XP_015154342.1|0.0e+00|PREDICTED: immunoglobulin-like and fibronectin type III domain-containing protein 1 isoform X39 [Gallus gallus]
100858985	0.01	0.323	4.83923	5.14499e-08	6.38058e-08	GPR61	XM_015298772.2	XP_015154258.1|3.7e-260|PREDICTED: probable G-protein coupled receptor 61 [Gallus gallus]
422547	9.686	267.376	4.78951	0	0	ACSL1	XM_025149628.1,NM_001012578.1,XM_015276227.2	XP_010157315.1|0.0e+00|PREDICTED: long-chain-fatty-acid--CoA ligase 1 isoform X1 [Eurypyga helias]
416408	0	0.163	4.78478	0.000115145	0.000180136	43720	XM_004945415.3,XM_015294708.2,XM_004945416.2,XM_015294710.2,XM_015294711.2,XM_004945417.3	XP_010717644.2|3.0e-228|PREDICTED: septin-12 isoform X1 [Meleagris gallopavo]
417968	0.006	0.173	4.78478	9.36018e-08	1.1789e-07	GUCY2C	XM_416207.6,XM_025155035.1	XP_416207.3|0.0e+00|PREDICTED: heat-stable enterotoxin receptor [Gallus gallus]
420096	0	0.146	4.78478	0.000115145	0.000180136	PRSS57	XM_418216.6,XM_015300002.2	XP_015155488.1|1.5e-169|PREDICTED: serine protease 57 isoform X2 [Gallus gallus]
421850	0	0.133	4.78478	0.000115145	0.000180136	ELOVL4	NM_001197309.1,XM_015284630.2,XM_025148767.1	NP_001184238.1|2.9e-167|elongation of very long chain fatty acids protein 4 [Gallus gallus]
107056801	0	0.53	4.72125	0.00016234	0.000257007	HDDC3	XM_015301796.2	XP_015147680.1|2.4e-99|PREDICTED: guanosine-3',5'-bis(diphosphate) 3'-pyrophosphohydrolase MESH1-like [Gallus gallus]
417006	0.013	0.393	4.69905	4.30377e-13	4.2289e-13	GAL3ST1	XM_415296.6,XM_004934444.3,XM_004934445.3,XM_025155688.1,XM_025155687.1	XP_004934501.1|1.7e-254|PREDICTED: galactosylceramide sulfotransferase isoform X1 [Gallus gallus]
BGI_novel_G000231	0	0.086	4.68366	0.000197226	0.000315147	BGI_novel_G000231	BGI_novel_T009233
107055290	0	0.103	4.6693	0.000212355	0.000340249	GPR179	XM_025144120.1,XM_025144121.1	XP_021233298.1|0.0e+00|probable G-protein coupled receptor 179 [Numida meleagris]
395885	0	0.1	4.6693	0.000212355	0.000340249	CNTFR	XM_015277246.2,NM_205028.1,XM_015277243.2	XP_015132729.1|3.9e-279|PREDICTED: ciliary neurotrophic factor receptor subunit alpha isoform X1 [Gallus gallus]
422520	0	0.043	4.6693	0.000212355	0.000340249	GRID2	XM_015276600.2,XM_420483.6	XP_004703320.1|0.0e+00|PREDICTED: glutamate receptor ionotropic, delta-2 isoform X1 [Echinops telfairi]
424300	0	0.036	4.6693	0.000212355	0.000340249	LOC424300	XM_025152679.1	XP_004943061.1|0.0e+00|PREDICTED: von Willebrand factor D and EGF domain-containing protein-like [Gallus gallus]
426054	0	0.196	4.6693	0.000212355	0.000340249	IL7R	NM_001080106.1	NP_001073575.1|2.4e-275|interleukin-7 receptor subunit alpha precursor [Gallus gallus]
428330	0	0.07	4.6693	0.000212355	0.000340249	SEMA6B	XM_015300012.2,XM_015300014.2,XM_015300016.2,XM_015300013.2,NM_001319026.1,XM_015300015.2	XP_015155501.1|0.0e+00|PREDICTED: semaphorin-6B isoform X2 [Gallus gallus]
428799	0	0.02	4.6693	0.000212355	0.000340249	ADRA2C	XM_004936302.3	XP_004936359.1|1.0e-255|PREDICTED: alpha-2C adrenergic receptor [Gallus gallus]
416075	0.306	7.703	4.65893	0	0	CADPS	XM_025154731.1,XM_025154721.1,XM_015293303.1,BGI_novel_T006095,XM_025154725.1,XM_015293298.1,XM_015293300.1,XM_015293297.1,XM_003642030.3,XM_025154724.1,XM_414412.5,XM_025154722.1,BGI_novel_T006097,XM_025154730.1,XM_025154728.1,XM_025154727.1,XM_025154726.1,BGI_novel_T006098,XM_004944652.3,BGI_novel_T006094,XM_025154723.1,XM_015293304.1,XM_003642029.4,XM_025154729.1,XM_015293301.1,BGI_novel_T0060…	XP_003642077.2|0.0e+00|PREDICTED: calcium-dependent secretion activator 1 isoform X3 [Gallus gallus]
428250	0.373	9.363	4.6544	0	0	LOC428250	XM_425809.5	XP_425809.3|0.0e+00|PREDICTED: uncharacterized protein LOC428250 [Gallus gallus]
416335	0.116	2.453	4.65089	5.42139e-128	1.36022e-128	SHROOM1	XM_025155024.1,BGI_novel_T006357,BGI_novel_T006356	XP_015149556.1|1.7e-237|PREDICTED: protein Shroom1 isoform X2 [Gallus gallus]
101747868	0.01	0.256	4.6079	5.70815e-07	7.53817e-07	LOC101747868	XM_004940078.3	XP_013046414.1|1.1e-73|PREDICTED: ly6/PLAUR domain-containing protein 2-like [Anser cygnoides domesticus]
418840	0.103	2.553	4.57788	3.01332e-100	8.85074e-101	LACC1	XM_025146796.1,XM_025146793.1,XM_025146795.1,XM_417036.6,XM_025146794.1,XM_015276628.2,BGI_novel_T000962	XP_417036.3|5.9e-253|PREDICTED: laccase domain-containing protein 1 [Gallus gallus]
417679	14.336	25.183	4.54801	0	0	MED31	BGI_novel_T007714,NM_001321595.1	XP_017940257.1|7.8e-68|PREDICTED: mediator of RNA polymerase II transcription subunit 31 [Manacus vitellinus]
407779	0	0.093	4.54377	0.000392923	0.000646718	KRT5	NM_001001195.2	NP_001001195.1|0.0e+00|keratin, type II cytoskeletal 5 [Gallus gallus]
414343	0	0.393	4.54377	0.000392923	0.000646718	AvBD9	NM_001001611.2	OXB54063.1|5.0e-32|hypothetical protein ASZ78_010856 [Callipepla squamata]
427845	0	0.056	4.54377	0.000392923	0.000646718	SLC26A4	XM_425419.6,XM_025153756.1,XM_025153755.1	XP_015706910.1|0.0e+00|PREDICTED: pendrin isoform X2 [Coturnix japonica]
428265	0	0.083	4.54377	0.000392923	0.000646718	IL20	XM_425824.5	XP_425824.2|1.6e-97|PREDICTED: interleukin-20 [Gallus gallus]
428201	0.103	2.503	4.49712	4.8151e-99	1.42731e-99	STC1	XM_004947560.3,XM_425760.5	XP_015738536.1|4.5e-153|PREDICTED: stanniocalcin-1 isoform X1 [Coturnix japonica]
101748744	0.01	0.183	4.47666	1.925e-06	2.62738e-06	LOC101748744	XM_015278430.2,XM_004940646.3	XP_004940703.1|1.9e-223|PREDICTED: serine protease 23-like isoform X1 [Gallus gallus]
107055393	0.006	0.156	4.47666	1.925e-06	2.62738e-06	TESPA1	XM_015300249.2,XM_025145632.1	XP_015155734.1|3.2e-226|PREDICTED: protein TESPA1 isoform X1 [Gallus gallus]
428249	0.003	0.063	4.47666	1.925e-06	2.62738e-06	DSCAML1	XM_003642612.4	XP_017664947.1|0.0e+00|PREDICTED: Down syndrome cell adhesion molecule-like protein 1 isoform X1 [Lepidothrix coronata]
415820	0.266	6.466	4.46855	2.11285e-244	3.2896e-245	HNF4beta	BGI_novel_T005797,NM_001030576.3,BGI_novel_T005794,BGI_novel_T005796,BGI_novel_T005795	NP_001025747.2|3.3e-272|hepatic nuclear factor 4beta [Gallus gallus]
419293	3.93	84.913	4.44115	0	0	LBP	XM_417465.6,XM_004947186.3	XP_010720907.1|1.2e-259|PREDICTED: bactericidal permeability-increasing protein-like isoform X2 [Meleagris gallopavo]
100859777	0	0.116	4.43766	0.000639154	0.00107219	DMBT1L3	XM_025146031.1	NP_001305912.1|0.0e+00|deleted in malignant brain tumors 1 protein-like precursor [Gallus gallus]
416523	0.073	1.813	4.43385	7.53091e-25	5.2834e-25	GRAP	NM_001277553.1,XM_025155086.1	XP_010717855.1|1.2e-109|PREDICTED: GRB2-related adapter protein [Meleagris gallopavo]
395468	162.346	3441.81	4.42557	0	0	CCL4	XM_015295666.2,NM_204720.1	NP_990051.1|6.1e-44|chemokine C-C motif ligand 4 precursor [Gallus gallus]
408040	0	0.126	4.40627	0.000732767	0.00123745	KRT15	NM_001001312.2	NP_001001312.2|1.7e-262|keratin, type I cytoskeletal 15 [Gallus gallus]
414342	0	0.373	4.40627	0.000732767	0.00123745	AvBD4	NM_001001610.2	NP_001001610.1|1.6e-32|gallinacin-4 prepropeptide precursor [Gallus gallus]
421944	0	0.026	4.40627	0.000732767	0.00123745	GREB1	XM_004935766.3	XP_004935823.1|0.0e+00|PREDICTED: protein GREB1 [Gallus gallus]
428334	0.006	0.156	4.40627	3.54406e-06	4.92265e-06	C2CD4C	XM_025144405.1	XP_015155493.1|1.6e-235|PREDICTED: C2 calcium-dependent domain-containing protein 4C [Gallus gallus]
777252	0.046	0.943	4.38186	5.79654e-90	1.82185e-90	SLC12A5	XM_025142287.1,XM_025142286.1	XP_001366304.1|0.0e+00|PREDICTED: solute carrier family 12 member 5 isoform X2 [Monodelphis domestica]
100857440	0.006	0.166	4.36631	3.69189e-11	3.92542e-11	LOC100857440	XM_025150191.1	XP_004936082.1|1.1e-224|PREDICTED: serine/arginine-rich splicing factor SR45-like [Gallus gallus]
776507	16.833	347.936	4.35263	0	0	LOC776507	XM_004950702.3,BGI_novel_T003261,BGI_novel_T003260,XM_001236024.4	XP_001236025.2|4.5e-191|PREDICTED: proto-oncogene Mas-like isoform X1 [Gallus gallus]
408048	0.04	0.726	4.34904	1.25849e-40	6.66823e-41	PCDH10	XM_015285363.2,XM_015285364.2,NM_214672.1,XM_015285365.2,XM_015285366.2,XM_015285367.2	XP_015140850.1|0.0e+00|PREDICTED: protocadherin-10 isoform X2 [Gallus gallus]
429152	0	0.053	4.33833	0.000977939	0.00167181	CYP2AB5	NM_001329497.1	XP_003209210.1|4.9e-281|PREDICTED: cytochrome P450 2J2-like isoform X2 [Meleagris gallopavo]
430484	0.01	0.193	4.33227	6.54634e-06	9.24519e-06	C5AR1	XM_015273054.2	XP_015128540.1|1.4e-186|PREDICTED: C5a anaphylatoxin chemotactic receptor 1 [Gallus gallus]
423478	0.72	14.31	4.30987	0	0	EXOC3L	XM_430056.6,XM_015287830.2	XP_430056.4|0.0e+00|PREDICTED: exocyst complex component 3-like protein [Gallus gallus]
395624	0.25	4.903	4.29497	2.69594e-138	6.3718e-139	FOXF1	XM_414186.6	XP_414186.5|1.1e-241|PREDICTED: forkhead box protein F1 [Gallus gallus]
420479	0.376	7.3	4.28228	1.17877e-210	2.08277e-211	MAP3K8	XM_418581.6,BGI_novel_T001278,XM_015282087.2,XM_025148361.1,XM_015282086.2	OXB84632.1|8.3e-296|hypothetical protein H355_001109 [Colinus virginianus]
378901	0.02	0.36	4.25426	1.08945e-09	1.23831e-09	RGS4	XM_015290232.2,XM_025152733.1,NM_204385.1,XM_025152734.1	XP_021260694.1|6.7e-44|regulator of G-protein signaling 4 isoform X2 [Numida meleagris]
414871	0.003	0.086	4.25426	1.20928e-05	1.74051e-05	KCNH6	NM_001305113.2,XM_015299309.2	XP_015154795.1|0.0e+00|PREDICTED: potassium voltage-gated channel subfamily H member 2 isoform X1 [Gallus gallus]
445340	0.053	0.906	4.23962	3.13544e-45	1.56163e-45	PRDM1	BGI_novel_T002377,XM_015284539.2,XM_025149060.1,BGI_novel_T002379,XM_003641038.4,BGI_novel_T002378,XM_025149059.1,XM_004940355.3,XM_015284538.2,XM_004940353.3,XM_025149056.1,XM_025149057.1,XM_015284537.2	OXB83178.1|0.0e+00|hypothetical protein H355_014434 [Colinus virginianus]
771586	0.153	2.863	4.23634	1.01943e-72	3.64696e-73	TMEM154	XM_001234847.4	XP_015716826.1|8.1e-114|PREDICTED: transmembrane protein 154 [Coturnix japonica]
396065	0.096	1.73	4.23409	3.25462e-33	1.9261e-33	AGTR1	XM_015291376.2,XM_015291377.2,XM_015291375.2,NM_205157.3,XM_025153316.1,BGI_novel_T005228,XM_025153317.1,XM_015291379.2	NP_990488.1|6.1e-208|type-1 angiotensin II receptor [Gallus gallus]
396489	6.103	113.586	4.22313	0	0	GLUL	NM_205493.1	XP_021260406.1|1.3e-229|glutamine synthetase isoform X2 [Numida meleagris]
396030	0.026	0.563	4.21362	6.04675e-25	4.23337e-25	BMPR1B	XM_015276153.2,NM_205132.1,XM_015276152.2	XP_019470330.1|9.4e-303|PREDICTED: bone morphogenetic protein receptor type-1B isoform X2 [Meleagris gallopavo]
428683	0.02	0.42	4.21362	1.99914e-09	2.30179e-09	FADS6	XM_426241.6	XP_021270636.1|7.2e-264|fatty acid desaturase 6 [Numida meleagris]
100859040	0.046	0.816	4.19982	3.50331e-13	3.42925e-13	IL17C	XM_003641945.4	XP_003641993.2|3.9e-108|PREDICTED: interleukin-17C [Gallus gallus]
404671	0.12	3.93	4.19871	2.40228e-97	7.2108e-98	IL12B	XM_015293642.2,NM_213571.1,XM_015293641.2,XM_025154822.1	NP_998736.1|5.5e-184|interleukin-12 subunit beta precursor [Gallus gallus]
428717	0.046	0.81	4.18987	7.11558e-55	3.09283e-55	GAB3	XM_004940821.2,XM_004940823.2,BGI_novel_T002711,XM_004940820.3,XM_015278621.2	XP_004940877.1|0.0e+00|PREDICTED: GRB2-associated-binding protein 3 isoform X1 [Gallus gallus]
BGI_novel_G000040	0.12	2.216	4.18855	5.27469e-94	1.60959e-94	BGI_novel_G000040	BGI_novel_T001261
416094	4.023	72.44	4.17643	0	0	GPR27	XM_003642028.4	XP_003642076.1|1.3e-222|PREDICTED: probable G-protein coupled receptor 27 [Gallus gallus]
422350	0.17	3.053	4.17445	9.75934e-242	1.52759e-242	COL4A6	XM_015278603.2,XM_420322.6	XP_420322.4|0.0e+00|PREDICTED: collagen alpha-6(IV) chain isoform X1 [Gallus gallus]
100858077	0.016	0.283	4.1718	3.70104e-24	2.63882e-24	RGSL1	XM_025153163.1	XP_015145944.1|2.3e-231|PREDICTED: regulator of G-protein signaling protein-like [Gallus gallus]
770939	0.206	3.603	4.16802	6.68999e-11	7.20078e-11	C11ORF52	XM_001234250.4	XP_001234251.1|5.6e-64|PREDICTED: uncharacterized protein C11orf52 homolog isoform X4 [Gallus gallus]
770173	0.203	3.356	4.165	1.0134e-94	3.08188e-95	KCNS1	XM_004947028.3,XM_015296735.2,XM_001232666.5	XP_010720610.1|1.2e-272|PREDICTED: potassium voltage-gated channel subfamily S member 1 isoform X2 [Meleagris gallopavo]
BGI_novel_G000066	0.043	0.753	4.1626	1.0864e-23	7.82499e-24	BGI_novel_G000066	BGI_novel_T002077
418549	18.406	330.12	4.16218	0	0	PDXK	NM_001278085.1,NM_001278084.2,XM_025149534.1	NP_001265013.1|2.1e-173|pyridoxal kinase isoform 1 [Gallus gallus]
772063	19.436	341.786	4.13903	0	0	STEAP4	XM_025148413.1,XM_001235256.5,XM_015281970.2,XM_025148414.1,XM_025148415.1,XM_004939271.3	XP_021244217.1|1.2e-264|metalloreductase STEAP4 [Numida meleagris]
419618	5.22	91.59	4.13601	0	0	ZC3H12A	XM_417765.6	XP_417765.3|0.0e+00|PREDICTED: ribonuclease ZC3H12A [Gallus gallus]
423476	0.006	0.1	4.12873	6.75214e-09	7.97087e-09	EXOC3L4	XM_421382.6	XP_421382.4|0.0e+00|PREDICTED: exocyst complex component 3-like protein 4 [Gallus gallus]
418228	0.016	0.313	4.11409	8.27845e-34	4.84934e-34	SCUBE1	XM_015291284.2,XM_015291268.2,XM_015291278.2,XM_015291272.2	XP_015146758.1|0.0e+00|PREDICTED: signal peptide, CUB and EGF-like domain-containing protein 1 isoform X2 [Gallus gallus]
100857319	0.09	1.546	4.10872	9.02652e-41	4.77529e-41	SHISA3	XM_025150306.1	XP_003641289.3|1.6e-141|PREDICTED: protein shisa-3 homolog [Gallus gallus]
395615	0.013	0.233	4.08434	4.14967e-05	6.21325e-05	SHH	NM_204821.1	NP_990152.1|1.1e-246|sonic hedgehog protein precursor [Gallus gallus]
420929	0.013	0.196	4.08434	1.24142e-08	1.48484e-08	SBK2	XM_419014.5	XP_419014.3|1.4e-231|PREDICTED: serine/threonine-protein kinase SBK2-like [Gallus gallus]
404533	0.04	0.6	4.02294	1.32828e-11	1.38441e-11	GDF9	NM_206988.2	NP_996871.2|7.1e-274|growth/differentiation factor 9 [Gallus gallus]
419557	8.053	127.893	4.02021	0	0	FABP3	NM_001030889.1	NP_001026060.1|8.6e-69|fatty acid-binding protein, heart [Gallus gallus]
419552	0.053	0.86	4.01508	7.92024e-15	7.28853e-15	LAPTM5	XM_417701.6,XM_004947678.3	XP_004947735.1|2.4e-138|PREDICTED: lysosomal-associated transmembrane protein 5 isoform X2 [Gallus gallus]
772372	4.776	76.49	4.0042	0	0	BDKRB1	NM_001080720.1,BGI_novel_T003785,XM_015287568.2	NP_001074189.1|7.1e-210|B1 bradykinin receptor [Gallus gallus]
428906	2.676	39.14	3.99727	0	0	BDKRB2	XM_015287552.2,XM_015287554.2,XM_015287553.2,XM_025150838.1,NM_001031553.1,BGI_novel_T003784	XP_015143038.1|6.6e-223|PREDICTED: B2 bradykinin receptor isoform X1 [Gallus gallus]
107049971	0.026	0.403	3.99123	7.68369e-05	0.00011781	LOC107049971	XM_015273776.2	XP_015129262.1|2.1e-96|PREDICTED: solute carrier family 22 member 6-like [Gallus gallus]
428068	0.003	0.066	3.99123	7.68369e-05	0.00011781	CCDC122	XM_015276635.2,XM_025146797.1	XP_015132121.1|5.6e-108|PREDICTED: coiled-coil domain-containing protein 122 [Gallus gallus]
429150	0.003	0.08	3.99123	7.68369e-05	0.00011781	NMUR1	XM_015291494.2,NM_001318436.1,XM_015291493.2	NP_001305365.1|6.6e-258|neuromedin-U receptor 1 [Gallus gallus]
771994	0.05	0.806	3.99123	2.43497e-11	2.56672e-11	LOC771994	XM_001235195.5	XP_001235196.3|6.9e-173|PREDICTED: oleosin-B3-like [Gallus gallus]
420928	41.923	662.22	3.9835	0	0	CMBL	XM_025147716.1,XM_004935118.3,XM_419013.6,XM_025147715.1,BGI_novel_T001573	XP_419013.1|9.2e-145|PREDICTED: carboxymethylenebutenolidase homolog [Gallus gallus]
421054	0.09	1.393	3.94614	5.85999e-42	3.04529e-42	TMEM200C	XM_004939752.3	XP_003640850.1|6.9e-301|PREDICTED: transmembrane protein 200C [Gallus gallus]
101748755	0.01	0.143	3.89169	0.000142023	0.000223898	LOC101748755	XM_025143835.1,XM_025143832.1,XM_015298777.2,XM_025143834.1,XM_025143833.1	XP_005239747.1|3.4e-300|PREDICTED: copine-5 [Falco peregrinus]
428856	0.016	0.143	3.89169	0.000142023	0.000223898	P2RX3	XM_025150827.1,NM_001329216.1	NP_001316145.1|1.9e-239|P2X purinoceptor 3 [Gallus gallus]
424883	39.99	584.383	3.87754	0	0	PLSCR1	BGI_novel_T005226,XM_015291618.2,BGI_novel_T005227,XM_001231236.5,BGI_novel_T005225,XM_015291619.2	XP_001231237.1|3.0e-185|PREDICTED: phospholipid scramblase 1 [Gallus gallus]
422244	0.02	0.23	3.85693	2.74268e-10	3.03818e-10	ADGRG4	XM_004940677.3,XM_015278477.2,XM_420232.6,XM_004940676.3	XP_004940733.1|0.0e+00|PREDICTED: adhesion G-protein coupled receptor G4 isoform X1 [Gallus gallus]
422425	0.03	0.49	3.84987	5.9661e-16	5.30174e-16	SPOCK3	XM_420393.6,XM_025150483.1,XM_025150485.1,XM_025150484.1	XP_420393.2|1.5e-269|PREDICTED: testican-3 isoform X1 [Gallus gallus]
BGI_novel_G000041	0.273	3.85	3.84257	2.24486e-150	5.01636e-151	BGI_novel_G000041	BGI_novel_T001262
770764	7.51	106.413	3.83673	0	0	MARCKSL1	NM_001080718.1	NP_001074187.1|8.3e-119|MARCKS-related protein [Gallus gallus]
427639	3.39	48.106	3.83404	0	0	ARSI	XM_004944946.3	XP_004945003.1|0.0e+00|PREDICTED: arylsulfatase I [Gallus gallus]
415988	0.323	4.573	3.83076	5.77396e-55	2.50489e-55	SUSD3	XM_414330.6	XP_414330.1|1.6e-158|PREDICTED: sushi domain-containing protein 3 [Gallus gallus]
395850	7.703	109.373	3.83009	0	0	MMP27	NM_205000.1	NP_990331.1|1.0e-282|matrix metalloproteinase-27 precursor [Gallus gallus]
418282	0.556	11.68	3.81926	0	0	PIANP	XM_004938113.3,XM_025142972.1,XM_025142967.1,XM_015293802.2,XM_025142975.1,BGI_novel_T000494,XM_025142992.1,XM_025142986.1,BGI_novel_T000496,XM_004938115.3,BGI_novel_T000493,XM_025142966.1,XM_025142982.1,BGI_novel_T000495,XM_025142977.1,XM_025142988.1	XP_015149288.1|6.4e-176|PREDICTED: PILR alpha-associated neural protein isoform X2 [Gallus gallus]
107049246	0.403	5.65	3.81905	1.70024e-90	5.31558e-91	GDF11	XM_025145635.1	XP_018105516.1|3.0e-192|PREDICTED: growth/differentiation factor 11-like isoform X1 [Xenopus laevis]
395458	0.023	0.54	3.81769	2.00535e-29	1.27807e-29	SLC6A2	XM_015292350.2,NM_204716.1,XM_015292351.2	XP_015147837.1|0.0e+00|PREDICTED: sodium-dependent noradrenaline transporter isoform X2 [Gallus gallus]
423790	0.04	0.56	3.81226	9.95314e-13	9.94136e-13	IFIT5	NM_001320422.1	NP_001307351.1|6.9e-279|interferon induced protein with tetratricopeptide repeats 5 [Gallus gallus]
395238	0.746	10.22	3.7684	0	0	WFDC1	NM_204554.1,XM_015292544.2	XP_015148030.1|3.9e-127|PREDICTED: WAP four-disulfide core domain protein 1 isoform X1 [Gallus gallus]
428209	0.196	2.58	3.7514	1.7906e-98	5.32635e-99	PTAFR	XM_004947701.3,XM_025143118.1	XP_004947758.1|2.5e-202|PREDICTED: platelet-activating factor receptor [Gallus gallus]
BGI_novel_G000042	0.396	5.313	3.74553	5.15927e-206	9.28748e-207	BGI_novel_G000042	BGI_novel_T001263
BGI_novel_G000092	1.656	22.116	3.74171	0	0	BGI_novel_G000092	BGI_novel_T003076
395950	0.026	0.336	3.7282	8.78929e-07	1.17332e-06	GBX2	NM_205068.1	NP_990399.1|2.1e-198|homeobox protein GBX-2 [Gallus gallus]
770956	0.396	5.096	3.69604	9.54974e-124	2.44962e-124	TMEM37	XM_001234271.5	XP_001234272.1|1.2e-104|PREDICTED: voltage-dependent calcium channel gamma-like subunit [Gallus gallus]
422108	2.48	31.973	3.69425	0	0	SLC9A3R1	NM_001006424.1	NP_001006424.1|8.0e-191|Na(+)/H(+) exchange regulatory cofactor NHE-RF1 [Gallus gallus]
100858713	0.083	1.013	3.68677	2.88351e-127	7.25868e-128	THT2L	XM_025153687.1,BGI_novel_T005204,XM_003641757.4,XM_025153688.1,BGI_novel_T005203	XP_003641805.1|9.7e-287|PREDICTED: thiamine transporter 2-like [Gallus gallus]
422078	0.013	0.183	3.6693	0.000490684	0.000814049	NPTX1	XM_420081.6	XP_420081.4|1.2e-261|PREDICTED: neuronal pentraxin-1 [Gallus gallus]
770757	0.04	0.503	3.6693	2.03803e-11	2.1428e-11	DRD3	XM_004938205.2	XP_004938262.1|7.5e-249|PREDICTED: D(3) dopamine receptor [Gallus gallus]
395829	2.533	31.866	3.6636	0	0	WNT9A	NM_204981.2	NP_990312.2|3.4e-220|protein Wnt-9a precursor [Gallus gallus]
396478	2.063	26.086	3.66223	0	0	LAMB1	XM_415943.6	XP_015706984.1|0.0e+00|PREDICTED: laminin subunit beta-1 [Coturnix japonica]
428643	0.666	8.41	3.65833	1.14839e-160	2.45638e-161	KHDRBS2	XM_025149087.1,XM_426201.6	XP_426201.2|6.0e-203|PREDICTED: KH domain-containing, RNA-binding, signal transduction-associated protein 2 [Gallus gallus]
422348	0.22	2.833	3.63551	4.19504e-214	7.33371e-215	COL4A5	BGI_novel_T002694,XM_015278607.2,XM_025150073.1,XM_015278605.2,XM_015278606.2	XP_015134092.1|0.0e+00|PREDICTED: collagen alpha-5(IV) chain isoform X2 [Gallus gallus]
428067	0.283	3.423	3.60182	1.1642e-72	4.1697e-73	TNFSF11	XM_015275777.2,NM_001083361.1	NP_001076830.1|1.0e-234|tumor necrosis factor ligand superfamily member 11 [Gallus gallus]
416474	0.056	0.666	3.60091	2.72658e-22	2.02339e-22	AMZ1	XM_414779.5	XP_414779.2|8.6e-300|PREDICTED: archaemetzincin-1 [Gallus gallus]
100858999	0.09	1.08	3.59657	2.5201e-31	1.54223e-31	ADAMTS4	XM_015280054.2	XP_015135540.1|0.0e+00|PREDICTED: A disintegrin and metalloproteinase with thrombospondin motifs 4 [Gallus gallus]
423943	0.04	0.493	3.58684	3.00446e-15	2.72736e-15	CUZD1	XM_015288891.2	XP_015144377.1|0.0e+00|PREDICTED: CUB and zona pellucida-like domain-containing protein 1 [Gallus gallus]
107052761	0.153	1.826	3.57833	2.52057e-35	1.44506e-35	GDF6	XM_015282935.2	XP_015138421.1|1.7e-234|PREDICTED: growth/differentiation factor 6 [Gallus gallus]
423583	4.046	47.946	3.56654	0	0	NID2	XM_015276768.2,XM_015276769.2	XP_015132255.1|0.0e+00|PREDICTED: nidogen-2 isoform X2 [Gallus gallus]
101748402	0.32	3.79	3.56458	0	0	NEBL1	XM_025152527.1,BGI_novel_T004639,XM_025152545.1,BGI_novel_T004640,XM_025152543.1,XM_025152544.1,XM_025152549.1,XM_025152532.1,XM_025152553.1,XM_025152547.1,XM_025152542.1,XM_025152526.1,BGI_novel_T004646,XM_025152539.1,XM_025152528.1,XM_025152531.1,BGI_novel_T004643,BGI_novel_T004636,XM_025152534.1,BGI_novel_T004645,XM_025152550.1,BGI_novel_T004647,XM_025152552.1,XM_025152554.1,BGI_novel_T004644,…	XP_004175224.1|0.0e+00|PREDICTED: LOW QUALITY PROTEIN: nebulin [Taeniopygia guttata]
100859892	0.083	0.97	3.55466	4.98699e-28	3.25818e-28	SEMA6C	XM_025143612.1,XM_015280042.2,XM_015280041.2	XP_015135527.1|0.0e+00|PREDICTED: semaphorin-6C isoform X1 [Gallus gallus]
396259	1.83	20.69	3.55051	0	0	FGFR2	XM_015288584.2,XM_015288594.2,XM_015288592.2,NM_205319.2,XM_015288585.2,BGI_novel_T004248,XM_015288591.2,XM_015288587.2,XM_015288586.2,XM_015288589.2,XM_025151490.1,BGI_novel_T004246,XM_015288588.2,BGI_novel_T004247,XM_015288590.2,BGI_novel_T004245	XP_013223554.2|0.0e+00|fibroblast growth factor receptor 2 isoform X8 [Columba livia]
395939	15.156	176.713	3.5496	0	0	DIO3	NM_001122648.2	XP_009635182.1|6.3e-157|PREDICTED: LOW QUALITY PROTEIN: type III iodothyronine deiodinase [Egretta garzetta]
100859721	0.066	0.58	3.54377	0.000912846	0.00155693	APOC3	NM_001302127.1,XM_025143168.1	XP_021231717.1|7.1e-54|apolipoprotein C-III-like isoform X1 [Numida meleagris]
101751615	0.196	2.426	3.54377	3.39803e-71	1.23329e-71	LOC101751615	BGI_novel_T008695,XM_025143525.1,XM_025143524.1	XP_021232237.1|1.3e-130|uncharacterized protein LOC110387884 [Numida meleagris]
107057619	0.083	1.013	3.54377	1.49247e-12	1.49877e-12	ACP5	XM_015302697.2	XP_015158183.1|9.6e-188|PREDICTED: tartrate-resistant acid phosphatase type 5 [Gallus gallus]
416676	0.003	0.06	3.54377	0.000912846	0.00155693	STRIP2	XM_025153057.1,XM_015287607.2,XM_004937413.3	XP_004937470.1|0.0e+00|PREDICTED: striatin-interacting protein 2 isoform X2 [Gallus gallus]
422653	0.02	0.21	3.54377	3.46225e-08	4.25414e-08	RASSF6	XM_015276397.2,BGI_novel_T002947,XM_420607.6,XM_004941188.3,BGI_novel_T002946,XM_015276398.2,XM_015276396.2,XM_004941187.3	XP_004941244.1|4.5e-193|PREDICTED: ras association domain-containing protein 6 isoform X1 [Gallus gallus]
428140	0.356	4.146	3.54098	1.60254e-103	4.60706e-104	MATN4	XM_425698.6	XP_425698.4|0.0e+00|PREDICTED: matrilin-4 [Gallus gallus]
421686	1.853	21.186	3.5252	0	0	IL20RA	BGI_novel_T002310,XM_015284185.2,XM_419723.5	XP_419723.1|0.0e+00|PREDICTED: interleukin-20 receptor subunit alpha isoform X1 [Gallus gallus]
107051813	3.53	39.963	3.51033	0	0	PTGDR	XM_015276771.2	XP_015132257.1|4.5e-208|PREDICTED: prostaglandin D2 receptor-like [Gallus gallus]
395550	0.483	5.423	3.49151	2.51403e-49	1.17479e-49	LY6E	NM_204775.1	NP_990106.1|1.0e-65|lymphocyte antigen 6E precursor [Gallus gallus]
427373	0.406	4.553	3.48894	1.23071e-194	2.32292e-195	CORO2A	XM_004949607.3,XM_025145067.1,XM_424946.6	XP_424946.4|0.0e+00|PREDICTED: coronin-2A isoform X1 [Gallus gallus]
416324	0.01	0.11	3.48632	2.16669e-08	2.63344e-08	ACSL6	XM_015294077.2,XM_015294076.2,XM_015294079.2,XM_015294080.2	XP_009089609.2|0.0e+00|PREDICTED: long-chain-fatty-acid--CoA ligase 6 isoform X5 [Serinus canaria]
771940	1.496	16.76	3.48568	0	0	CP	XM_015291853.2	XP_015147339.1|0.0e+00|PREDICTED: ceruloplasmin [Gallus gallus]
419106	0.02	0.153	3.47666	1.0008e-05	1.43213e-05	GATA3	XM_015293337.2,NM_001008444.1,XM_015293289.2,XM_015293418.2,XM_015293371.2	NP_001008444.1|9.4e-272|GATA-binding factor 3 [Gallus gallus]
768487	0.01	0.113	3.43818	7.74303e-08	9.70394e-08	MYH13	XM_025141815.1	KFQ00955.1|0.0e+00|Myosin-4 [Haliaeetus albicilla]
417192	0.36	3.856	3.43349	6.4096e-43	3.29227e-43	TOR1BL	NM_001277658.1,XM_025156070.1	NP_001264587.1|7.3e-154|torsin family 1, member B-like precursor [Gallus gallus]
419945	0.096	1.013	3.41585	1.15437e-30	7.18439e-31	ASIC2	XM_418066.5	XP_009462907.1|4.2e-304|PREDICTED: acid-sensing ion channel 2 [Nipponia nippon]
100857499	0.013	0.133	3.40627	1.8327e-05	2.67512e-05	KCNU1	XM_015297430.2	XP_015152916.1|0.0e+00|PREDICTED: potassium channel subfamily U member 1 [Gallus gallus]
112530908	0.05	0.506	3.40627	2.96387e-11	3.13719e-11	FLRT1	XM_025145510.1	XP_021410666.1|3.4e-204|leucine-rich repeat transmembrane protein FLRT1-like [Lonchura striata domestica]
418104	0.043	0.436	3.40627	3.57075e-13	3.49675e-13	ATP6V0A4	XM_015285503.2,NM_001080102.2	NP_001073571.2|0.0e+00|V-type proton ATPase 116 kDa subunit a isoform 4 [Gallus gallus]
428670	0.006	0.076	3.40627	1.8327e-05	2.67512e-05	OPN5	NM_001130743.1,XM_015285151.2	XP_015140637.1|6.9e-262|PREDICTED: opsin-5 isoform X1 [Gallus gallus]
374129	0.216	2.676	3.39662	3.77585e-30	2.37742e-30	LMO2	XM_015286755.2,NM_204271.1	XP_021258459.1|4.6e-101|rhombotin-2 isoform X1 [Numida meleagris]
395807	5.813	60.796	3.39318	0	0	NOS2	NM_204961.1	XP_021271000.1|0.0e+00|nitric oxide synthase, inducible [Numida meleagris]
417485	0.386	4.013	3.3869	4.55473e-58	1.90873e-58	NCF1	NM_001030709.1,XM_015295704.2	XP_015151190.1|9.5e-212|PREDICTED: neutrophil cytosol factor 1 isoform X1 [Gallus gallus]
418095	0.526	5.19	3.38202	1.06533e-102	3.08038e-103	DRAM1	XM_001234898.5,XM_416328.5,XM_015287722.2	XP_015143208.1|1.9e-152|PREDICTED: DNA damage-regulated autophagy modulator protein 1 isoform X1 [Gallus gallus]
395777	0.073	0.743	3.3731	1.63329e-42	8.43011e-43	PHEX	XM_015302343.2,NM_001199277.2,BGI_novel_T000754	NP_001186206.2|0.0e+00|phosphate-regulating neutral endopeptidase [Gallus gallus]
769742	0.336	3.396	3.3456	3.8289e-63	1.50189e-63	SCG5	NM_001291758.1	NP_001278687.1|2.5e-119|neuroendocrine protein 7B2 precursor [Gallus gallus]
BGI_novel_G000045	0.08	0.85	3.34307	5.98056e-27	4.01174e-27	BGI_novel_G000045	BGI_novel_T001320
421684	2.103	21.233	3.33675	0	0	TNFAIP3	XM_015284186.2,XM_015284187.2	XP_015139672.1|0.0e+00|PREDICTED: tumor necrosis factor alpha-induced protein 3 [Gallus gallus]
100858009	35.113	348.62	3.33299	0	0	TNIP1	BGI_novel_T006285,XM_004944943.3,XM_004944944.2,XM_003642060.4	XP_003642108.2|0.0e+00|PREDICTED: TNFAIP3-interacting protein 1 isoform X2 [Gallus gallus]
373912	0.073	0.71	3.33227	3.36327e-05	4.99384e-05	NOG	NM_204123.1	NP_989454.1|3.1e-132|noggin precursor [Gallus gallus]
112531391	0.16	1.373	3.31564	1.29294e-11	1.34651e-11	LOC112531391	XM_025146430.1,XM_025146429.1	XP_010726107.1|7.6e-32|PREDICTED: transmembrane and coiled-coil domain-containing protein 5B-like [Meleagris gallopavo]
768736	0.03	0.283	3.29925	2.4617e-05	3.62447e-05	PANX3	XM_015298095.2,XM_001231502.4	XP_001231503.1|1.3e-232|PREDICTED: pannexin-3 isoform X2 [Gallus gallus]
423930	1.706	16.576	3.27977	0	0	RGS10	XM_015288910.2,XM_015288909.2	XP_015144395.1|1.0e-109|PREDICTED: regulator of G-protein signaling 10 isoform X1 [Gallus gallus]
418130	0.203	1.98	3.27936	3.49638e-66	1.33439e-66	PKP2	XM_416362.5	XP_416362.5|0.0e+00|PREDICTED: plakophilin-2 [Gallus gallus]
101749622	0.013	0.116	3.27653	1.92002e-08	2.32644e-08	SERPINB10A	XM_004939683.3	XP_004939740.1|1.7e-238|PREDICTED: heterochromatin-associated protein MENT [Gallus gallus]
100034745	3.313	31.886	3.27617	2.7381e-284	3.74513e-285	PTGER2	NM_001083365.1	NP_001076834.1|5.0e-204|prostaglandin E2 receptor EP2 subtype [Gallus gallus]
396093	15.666	149.656	3.26489	0	0	NFKBIA	NM_001001472.2	XP_021258052.1|1.6e-188|NF-kappa-B inhibitor alpha [Numida meleagris]
107049660	0.31	2.926	3.25426	1.30901e-16	1.13549e-16	LOC107049660	XM_025148126.1	XP_005533277.1|2.3e-90|PREDICTED: glycogen phosphorylase, muscle form [Pseudopodoces humilis]
101747958	5.293	41.05	3.2441	0	0	LOC101747958	BGI_novel_T002038,XM_025149265.1,BGI_novel_T002035,BGI_novel_T002034,BGI_novel_T002039,BGI_novel_T002041,XM_015283534.2,XM_004935236.3,XM_015283536.2,XM_025149264.1,BGI_novel_T002042,BGI_novel_T002037,BGI_novel_T002043,XM_004935235.3,BGI_novel_T002040,XM_015283533.2,BGI_novel_T002036,XM_015283535.2,XM_025149266.1	XP_015139020.1|5.6e-94|PREDICTED: estradiol 17-beta-dehydrogenase 2-like isoform X3 [Gallus gallus]
417319	1.253	11.89	3.2403	0	0	PIK3R5	XM_015295131.1,XM_015295132.2,XM_015295133.2,BGI_novel_T007301,BGI_novel_T007302,XM_015295134.1,BGI_novel_T007300,NM_001030697.1	NP_001025868.1|0.0e+00|phosphoinositide 3-kinase regulatory subunit 5 [Gallus gallus]
419407	10.006	94.766	3.23829	0	0	MMP23B	XM_025142634.1,XM_004947398.3,XM_417569.4	XP_417569.1|1.7e-243|PREDICTED: matrix metalloproteinase-23 isoform X1 [Gallus gallus]
419263	0.033	0.33	3.23029	5.78893e-11	6.21407e-11	STMN3	NM_001004393.1,XM_025142225.1	OPJ84951.1|4.9e-91|stathmin-3 [Patagioenas fasciata monilis]
693252	0.253	2.35	3.22482	3.88807e-37	2.17409e-37	IL6R	NM_001044675.1,XM_025143427.1	NP_001038140.1|8.6e-265|interleukin-6 receptor subunit alpha precursor [Gallus gallus]
415708	1.3	11.94	3.21604	6.9433e-219	1.18351e-219	RIPK3	XM_001232871.5,XM_025154269.1,XM_004944149.3	XP_004944206.1|1.5e-274|PREDICTED: receptor-interacting serine/threonine-protein kinase 2 isoform X1 [Gallus gallus]
418742	0.04	0.37	3.19982	2.28912e-06	3.13483e-06	GRTP1	XM_416941.6	XP_416941.5|2.2e-197|PREDICTED: growth hormone-regulated TBC protein 1 [Gallus gallus]
417568	0.05	0.456	3.18868	3.00058e-17	2.55667e-17	SARM1	XM_415814.6	XP_021271077.1|0.0e+00|sterile alpha and TIR motif-containing protein 1 isoform X2 [Numida meleagris]
418496	0.25	1.956	3.18237	1.96706e-26	1.33381e-26	EVA1C	XM_015299792.2,BGI_novel_T000670,XM_025145015.1,XM_015299781.2,XM_015299796.2,XM_416704.6,XM_015299795.2,BGI_novel_T000671	XP_015155281.1|2.1e-229|PREDICTED: protein eva-1 homolog C isoform X4 [Gallus gallus]
396212	28.883	254.623	3.17814	0	0	MT4L	NM_205275.1	XP_010716357.1|4.1e-41|PREDICTED: metallothionein [Meleagris gallopavo]
427737	0.066	0.77	3.17236	1.23072e-08	1.47153e-08	YF6	XM_025155863.1,XM_015295039.2,XM_015295043.2,XM_015295042.2,XM_015295038.2,XM_015295040.2	XP_015157586.1|7.0e-223|PREDICTED: MHC-like class I Y isoform X2 [Gallus gallus]
770203	0.02	0.18	3.1718	0.000111216	0.000173527	WDR86	XM_015281243.2,XM_025148294.1,XM_004939130.3,XM_001233534.5	XP_001233535.2|3.9e-238|PREDICTED: WD repeat-containing protein 86 [Gallus gallus]
769222	0.153	1.323	3.12333	3.66728e-108	1.02303e-108	ADAMTS8	XM_015298130.2	XP_015153616.1|0.0e+00|PREDICTED: A disintegrin and metalloproteinase with thrombospondin motifs 8 [Gallus gallus]
423272	2.366	20.36	3.11275	3.13802e-192	5.96203e-193	ARG2	NM_001199704.1	NP_001186633.1|5.5e-204|arginase-2, mitochondrial [Gallus gallus]
418404	12.783	109.82	3.0868	0	0	NFKBIZ	XM_015296165.1,NM_001006254.1,BGI_novel_T000614,XM_015296174.2,XM_015296184.2,BGI_novel_T000615,BGI_novel_T000612,XM_015296148.2,BGI_novel_T000611,XM_015296152.1,BGI_novel_T000613,BGI_novel_T000610,XM_015296158.2	XP_015151644.1|0.0e+00|PREDICTED: NF-kappa-B inhibitor zeta isoform X3 [Gallus gallus]
428633	0.01	0.093	3.08434	7.47508e-06	1.06019e-05	CNR1	NM_001038652.1,XM_015284638.2,XM_015284635.2,XM_015284636.2	OPJ73305.1|3.0e-284|cannabinoid receptor 1 [Patagioenas fasciata monilis]
771389	0.01	0.103	3.08434	7.47508e-06	1.06019e-05	TMEM132E	XM_015296019.2	XP_015151505.1|0.0e+00|PREDICTED: transmembrane protein 132E [Gallus gallus]
112530174	1.483	12.463	3.08285	3.0678e-171	6.26864e-172	LOC112530174	BGI_novel_T008202,XM_025142857.1	XP_020793447.1|2.8e-87|mucin-5AC-like [Boleophthalmus pectinirostris]
420486	0.03	0.256	3.07925	4.67303e-17	4.00792e-17	LOC420486	XM_015282063.2	XP_015137549.1|0.0e+00|PREDICTED: phthioceranic/hydroxyphthioceranic acid synthase-like [Gallus gallus]
100857462	1.076	9.103	3.07149	0	0	RAPGEF5	XM_015281856.2,BGI_novel_T001345,XM_015281855.2	XP_015137341.1|0.0e+00|PREDICTED: rap guanine nucleotide exchange factor 5 isoform X1 [Gallus gallus]
418657	4.55	38.136	3.06542	0	0	MXRA5	XM_416853.6	XP_416853.4|0.0e+00|PREDICTED: matrix-remodeling-associated protein 5 [Gallus gallus]
101750367	0.05	0.39	3.02294	1.34685e-05	1.94467e-05	LOC101750367	XM_015296594.2,XM_004947184.3,XM_015296595.2	XP_015152081.1|1.3e-169|PREDICTED: BPI fold-containing family B member 4-like isoform X3 [Gallus gallus]
396248	59.703	480.836	3.01876	0	0	CKB	NM_205310.1,XM_015287304.2,XM_025150611.1,BGI_novel_T003824	OXB73595.1|4.2e-223|hypothetical protein H355_005310 [Colinus virginianus]
415313	0.106	0.846	3.01508	3.65801e-12	3.72743e-12	C10H15ORF59	NM_001293207.1	NP_001280136.1|5.1e-165|UPF0583 protein C15orf59 homolog [Gallus gallus]
415570	0.4	3.246	3.0116	2.17634e-197	4.05347e-198	ADAMTS7	XM_003641830.4	XP_003641878.2|0.0e+00|PREDICTED: A disintegrin and metalloproteinase with thrombospondin motifs 7 [Gallus gallus]
418885	0.09	0.603	3.0049	9.31668e-11	1.0121e-10	TPTE2	XM_004938736.3,XM_004938735.3,XM_015275968.2,XM_015275960.2,XM_417079.5,XM_004938734.3,XM_015275964.2,XM_015275958.2,XM_015275953.2,XM_004938737.3,XM_004938733.3	OXB77196.1|1.9e-291|hypothetical protein H355_012563, partial [Colinus virginianus]
421992	3.86	31.396	3.0033	0	0	DTNB	BGI_novel_T002501,XM_015285231.2,XM_015285239.2,XM_015285240.2,XM_015285228.2,XM_015285237.2,XM_015285229.2,XM_015285235.2,XM_015285238.2,XM_015285236.2,XM_015285234.2,BGI_novel_T002500,XM_015285233.2	XP_012961411.1|0.0e+00|dystrobrevin beta isoform X2 [Anas platyrhynchos]
112530348	0.013	0.113	2.99123	0.000365786	0.000599391	LOC112530348	XM_025144130.1	XP_015741056.1|5.1e-120|PREDICTED: probable G-protein coupled receptor 179 [Coturnix japonica]
112531526	0.066	0.51	2.99123	0.000365786	0.000599391	LOC112531526	XM_025146735.1	XP_004937010.2|5.9e-36|PREDICTED: LIM and senescent cell antigen-like-containing domain protein 2 [Gallus gallus]
416735	0.013	0.11	2.99123	0.000365786	0.000599391	ANKEF1	XM_004935241.3	XP_004935298.2|0.0e+00|PREDICTED: ankyrin repeat and EF-hand domain-containing protein 1 [Gallus gallus]
427987	0.046	0.383	2.98556	2.65073e-23	1.92522e-23	UMODL1	XM_015301032.2	XP_015156518.1|0.0e+00|PREDICTED: uromodulin-like 1 [Gallus gallus]
101748297	0.03	0.226	2.95881	2.41913e-05	3.55978e-05	SOWAHB	XM_025150257.1	XP_015717065.1|0.0e+00|PREDICTED: ankyrin repeat domain-containing protein SOWAHB [Coturnix japonica]
693266	0.043	0.31	2.95256	1.30252e-07	1.65377e-07	CASP18	XM_025152263.1,NM_001044689.1	NP_001038154.1|2.5e-267|initiator caspase [Gallus gallus]
415579	0.443	3.433	2.95175	3.22223e-150	7.20711e-151	ANKRD34C	XM_413947.6	XP_413947.3|2.3e-281|PREDICTED: LOW QUALITY PROTEIN: ankyrin repeat domain-containing protein 34C [Gallus gallus]
100858035	1.053	8.02	2.94436	1.28747e-90	4.01707e-91	ENDOU	XM_003643121.4	XP_003643169.1|4.8e-218|PREDICTED: poly(U)-specific endoribonuclease [Gallus gallus]
422752	0.743	5.443	2.94157	1.93599e-243	3.01826e-244	LNX1	XM_420707.6,XM_015285531.2,BGI_novel_T003073,XM_004936027.3,XM_015285527.2,XM_004936026.3,XM_015285530.2,XM_015285526.2,XM_004936028.3,BGI_novel_T003074,XM_015285529.2,XM_015285528.2	XP_004936083.1|0.0e+00|PREDICTED: E3 ubiquitin-protein ligase LNX isoform X1 [Gallus gallus]
428320	0.076	0.61	2.93234	9.45638e-20	7.51093e-20	TMPRSS9	XM_004948652.3,XM_425880.6	XP_425880.4|0.0e+00|PREDICTED: transmembrane protease serine 9 isoform X1 [Gallus gallus]
418984	24.716	187.696	2.93049	0	0	TMEM123	NM_001006279.2	NP_001006279.2|2.0e-99|porimin precursor [Gallus gallus]
420057	27.403	224.756	2.9274	0	0	SLC1A6	BGI_novel_T009003,BGI_novel_T009007,XM_004948655.3,XM_015299799.2,XM_025144316.1,BGI_novel_T009004,BGI_novel_T009005,BGI_novel_T009006	XP_004948712.1|3.7e-310|PREDICTED: excitatory amino acid transporter 4 isoform X1 [Gallus gallus]
420539	0.026	0.19	2.91216	1.77304e-13	1.71382e-13	ZNF804B	XM_015281605.2	XP_015137091.1|0.0e+00|PREDICTED: zinc finger protein 804B, partial [Gallus gallus]
429219	0.063	0.46	2.91216	1.77304e-13	1.71382e-13	RNF157	XM_015295312.2,XM_015295311.2,XM_015295309.2,XM_015295310.2	XP_015150796.1|0.0e+00|PREDICTED: RING finger protein 157 isoform X2 [Gallus gallus]
100359387	0.123	0.82	2.91031	1.39838e-27	9.23205e-28	CARNS1	XM_025150527.1,XM_025150526.1,NM_001172593.1	NP_001166064.1|0.0e+00|carnosine synthase 1 [Gallus gallus]
428070	7.593	56.586	2.90132	0	0	HTR2A	BGI_novel_T000968,NM_001318420.1,XM_025151250.1	NP_001305349.1|4.4e-267|5-hydroxytryptamine receptor 2A [Gallus gallus]
422905	193.9	1456.88	2.89847	0	0	SPON2	XM_015285992.2,XM_025150175.1,XM_004936233.3	XP_004936290.2|2.4e-230|PREDICTED: spondin-2 isoform X1 [Gallus gallus]
100859495	0.266	1.966	2.89169	1.83993e-52	8.22302e-53	CTXN2	XM_015291952.2,XM_004943801.3	XP_004943858.1|2.0e-38|PREDICTED: cortexin-2 [Gallus gallus]
112531806	0.186	1.33	2.89169	0.000661095	0.00111037	LOC112531806	XM_025147753.1	AAI55512.1|7.5e-10|LOC100127866 protein, partial [Xenopus tropicalis]
420604	0.006	0.04	2.89169	0.000661095	0.00111037	MACC1	XM_418705.6,XM_015281864.2	XP_015137350.1|0.0e+00|PREDICTED: metastasis-associated in colon cancer protein 1 isoform X2 [Gallus gallus]
769974	0.016	0.116	2.89169	4.33353e-05	6.50116e-05	TMPRSS7	XM_001233290.5,XM_004938293.3,XM_025144304.1,XM_025144301.1	XP_001233291.2|0.0e+00|PREDICTED: transmembrane protease serine 7 isoform X1 [Gallus gallus]
416093	1.523	11.423	2.87716	4.84563e-196	9.05527e-197	EIF4E3	XM_003642027.4,XM_004944690.2,XM_004944689.3,BGI_novel_T006120,BGI_novel_T006119	XP_010717033.1|2.8e-77|PREDICTED: eukaryotic translation initiation factor 4E type 3 [Meleagris gallopavo]
422099	0.573	4.13	2.86475	1.23795e-157	2.68397e-158	ABCC3	XM_015295531.2,XM_015295529.2,BGI_novel_T007461,XM_015295526.2,XM_025141702.1,XM_015295532.2,XM_015295528.2,BGI_novel_T007462	XP_011585292.1|0.0e+00|PREDICTED: canalicular multispecific organic anion transporter 2 isoform X1 [Aquila chrysaetos canadensis]
420197	4.396	31.623	2.8538	3.65969e-301	4.74701e-302	FABP5	NM_001006346.1	XP_021244128.1|6.2e-76|uncharacterized protein LOC110394542 [Numida meleagris]
429506	0.546	3.993	2.85373	1.09998e-184	2.1402e-185	GRHL2	XM_427063.6,BGI_novel_T001813,XM_004939980.3,BGI_novel_T001811,XM_004939981.3,XM_004939979.3,BGI_novel_T001812	XP_004940036.2|0.0e+00|PREDICTED: grainyhead-like protein 2 homolog isoform X2 [Gallus gallus]
431047	0.156	1.096	2.83923	3.54305e-19	2.8576e-19	NR1D1	XM_003642864.4,XM_015299882.2	XP_003642912.2|3.9e-250|PREDICTED: nuclear receptor ROR-beta-like isoform X1 [Gallus gallus]
100857433	12.583	88.736	2.83443	0	0	PLIN4	XM_004948798.2,BGI_novel_T009104,XM_015299884.2,XM_025144244.1,BGI_novel_T009103,NM_001317088.1	NP_001304017.1|8.9e-237|perilipin-4 [Gallus gallus]
419492	0.03	0.226	2.8213	7.72007e-05	0.000118416	DRAXIN	NM_001142848.2,XM_025142535.1,XM_025142536.1	NP_001136320.1|1.5e-206|draxin precursor [Gallus gallus]
768582	0.05	0.246	2.8213	7.72007e-05	0.000118416	TREM-B2	XM_015298959.2,NM_001080868.1,NM_001080870.1	NP_001074339.1|1.2e-219|triggering receptor expressed on myeloid cells isoform 1 precursor [Gallus gallus]
422531	0.63	4.536	2.82022	4.40192e-144	1.01568e-144	DKK2	XM_025150026.1,XM_015276579.2,XM_015276578.2,XM_420494.6	XP_420494.1|3.7e-162|PREDICTED: dickkopf-related protein 2 isoform X1 [Gallus gallus]
395908	0.276	1.886	2.79005	1.76661e-23	1.27942e-23	OASL	NM_205041.1,XM_015293006.2	XP_015148492.1|3.3e-305|PREDICTED: 59 kDa 2'-5'-oligoadenylate synthase-like protein isoform X1 [Gallus gallus]
770506	0.04	0.293	2.78478	7.44568e-08	9.322e-08	AGPAT1	XM_001233845.4	XP_001233846.2|5.7e-151|PREDICTED: 1-acyl-sn-glycerol-3-phosphate acyltransferase alpha-like [Gallus gallus]
395369	0.316	2.17	2.77848	5.60378e-56	2.4031e-56	CRISPLD1	XM_015282768.2,BGI_novel_T001760,NM_204654.2	NP_989985.2|0.0e+00|cysteine-rich secretory protein LCCL domain-containing 1 [Gallus gallus]
396146	3.426	23.323	2.77824	5.98634e-141	1.39868e-141	GCH1	NM_205223.1	NP_990554.1|5.1e-130|GTP cyclohydrolase 1 [Gallus gallus]
395799	0.08	0.35	2.7724	7.61249e-11	8.22378e-11	TPH1	NM_204956.1,XM_015286577.2	XP_015142063.1|6.3e-278|PREDICTED: tryptophan 5-hydroxylase 1 isoform X1 [Gallus gallus]
BGI_novel_G000240	0.24	1.643	2.76939	1.60446e-60	6.50364e-61	BGI_novel_G000240	BGI_novel_T009319
428574	0.063	0.43	2.76737	4.17903e-31	2.57308e-31	TMEM151B	XM_025148870.1	XP_014124431.1|1.9e-304|PREDICTED: transmembrane protein 151B [Zonotrichia albicollis]
416266	0.006	0.046	2.76241	1.08926e-06	1.46179e-06	FAT2	XM_414584.6	XP_414584.4|0.0e+00|PREDICTED: protocadherin Fat 2 [Gallus gallus]
395509	14.736	92.603	2.75753	0	0	PDGFRA	NM_204749.2,XM_015285414.2	NP_990080.2|0.0e+00|platelet-derived growth factor receptor alpha precursor [Gallus gallus]
420090	24.86	159.88	2.74744	0	0	ACSBG2	XM_015299817.2,XM_015299819.2,XM_015299815.2,NM_001012846.2,XM_015299814.2,XM_015299816.2	OXB72644.1|0.0e+00|hypothetical protein H355_002135 [Colinus virginianus]
416268	0.066	0.433	2.7473	1.30968e-07	1.66314e-07	CCDC69	XM_414586.5	XP_414586.1|3.6e-165|PREDICTED: coiled-coil domain-containing protein 69 [Gallus gallus]
418732	1.01	6.82	2.74308	3.45293e-108	9.62518e-109	43718	XM_025146691.1,BGI_novel_T000863,XM_025146690.1,XM_015277915.2	XP_015705092.1|1.0e-248|PREDICTED: septin-10 isoform X1 [Coturnix japonica]
419076	2.236	14.87	2.73184	1.26082e-155	2.75453e-156	HPX	XM_015280936.2	XP_015136422.1|3.4e-280|PREDICTED: hemopexin [Gallus gallus]
416308	1.316	8.806	2.72748	8.77152e-159	1.89445e-159	SLC25A48	XM_025154932.1,XM_025154931.1,BGI_novel_T006329,XM_025154933.1,XM_015293979.2	XP_015149465.1|3.2e-174|PREDICTED: solute carrier family 25 member 48 [Gallus gallus]
423413	0.966	6.36	2.72021	2.72192e-113	7.3781e-114	FBLN5	NM_001277474.1	XP_015485623.1|2.2e-284|PREDICTED: fibulin-5 [Parus major]
771999	0.82	5.373	2.71993	3.67853e-15	3.34766e-15	GNG11	XM_015281589.2,XM_015281590.2,NM_001278047.2	NP_001264976.2|2.2e-33|guanine nucleotide-binding protein G(I)/G(S)/G(O) subunit gamma-11 [Gallus gallus]
395389	6.786	44.636	2.71858	0	0	ALDH1A3	NM_204669.1	XP_014461437.1|6.5e-284|PREDICTED: aldehyde dehydrogenase family 1 member A3 isoform X1 [Alligator mississippiensis]
693256	0.13	0.836	2.71072	3.72698e-08	4.58794e-08	BLB1	NM_001044679.2,XM_015294994.2	XP_015150480.1|2.0e-150|PREDICTED: major histocompatibility complex class II beta chain BLB1, (similar to HLA class II, D beta chain) isoform X1 [Gallus gallus]
417429	0.056	0.35	2.70883	2.30165e-07	2.96062e-07	CACNG5	XM_015279957.2,XM_015279959.2	XP_015735015.1|3.2e-168|PREDICTED: voltage-dependent calcium channel gamma-5 subunit isoform X1 [Coturnix japonica]
430433	0.98	6.383	2.70701	5.47945e-108	1.53083e-108	LOC430433	XM_015272637.2	XP_015128123.1|2.0e-170|PREDICTED: mas-related G-protein coupled receptor member H-like [Gallus gallus]
548626	194.573	1256.03	2.69805	0	0	PTX3	BGI_novel_T005366,NM_001017413.1	NP_001017413.1|5.9e-249|pentraxin-related protein PTX3 precursor [Gallus gallus]
422341	14.216	92.366	2.6976	0	0	CAPN6	XM_025150254.1,XM_015278596.2,XM_420313.6	OXB67621.1|0.0e+00|hypothetical protein ASZ78_016744 [Callipepla squamata]
416818	0.33	2.13	2.69697	8.5894e-228	1.41053e-228	DNAH10	XM_015275358.2	XP_021268217.1|0.0e+00|dynein heavy chain 10, axonemal isoform X4 [Numida meleagris]
112529957	0.026	0.15	2.69557	0.000557031	0.000928984	LOC112529957	XM_025142141.1,XM_025142140.1	XP_015151379.1|2.4e-119|PREDICTED: sperm acrosome membrane-associated protein 6-like [Gallus gallus]
408082	0.133	0.843	2.6892	7.42426e-13	7.37997e-13	EDNRB	NM_001001127.1	NP_001001127.1|1.8e-257|endothelin B receptor precursor [Gallus gallus]
395164	0.296	1.91	2.67729	2.99815e-29	1.91455e-29	BHLHE22	NM_204503.1	OXB63514.1|7.3e-172|hypothetical protein ASZ78_007595 [Callipepla squamata]
373900	64.026	403.4	2.67679	0	0	UGP2	XM_015278016.2,NM_204111.2	XP_013051647.1|6.7e-287|PREDICTED: UTP--glucose-1-phosphate uridylyltransferase [Anser cygnoides domesticus]
395935	1.803	11.393	2.67104	1.53288e-127	3.85235e-128	VTN	NM_205061.1	NP_990392.1|5.5e-276|vitronectin precursor [Gallus gallus]
101749098	0.03	0.163	2.6693	3.35967e-06	4.65956e-06	ITGA7	XM_015272592.2,XM_015272590.2,XM_015272594.2,XM_015272593.2,XM_015272589.2,XM_015272588.2	XP_015128074.1|0.0e+00|PREDICTED: integrin alpha-7 isoform X1 [Gallus gallus]
418617	0.073	0.443	2.6693	5.385e-19	4.36894e-19	REPS2	NM_001030806.1,XM_015273117.2	XP_015128603.1|0.0e+00|PREDICTED: ralBP1-associated Eps domain-containing protein 2 isoform X1 [Gallus gallus]
420753	0.093	0.586	2.6693	8.66105e-11	9.38894e-11	PPP1R17	XM_418851.6	OXB83194.1|2.7e-87|hypothetical protein H355_001946, partial [Colinus virginianus]
427588	0.28	1.713	2.66383	1.63039e-41	8.54393e-42	KLF15	XM_004944605.3,XM_015293361.2,XM_025154676.1,XM_425161.5	XP_425161.3|5.9e-277|PREDICTED: Krueppel-like factor 15 isoform X1 [Gallus gallus]
396048	1.006	6.34	2.66343	8.76235e-39	4.77943e-39	NCALD	NM_205143.1	KYO29366.1|4.3e-108|neurocalcin-delta [Alligator mississippiensis]
723973	0.85	5.223	2.66299	1.14169e-39	6.13005e-40	CAMK4	BGI_novel_T009531,BGI_novel_T009530,NM_001034813.1,BGI_novel_T009532	NP_001029985.1|2.0e-216|calcium/calmodulin-dependent protein kinase type IV [Gallus gallus]
418423	0.2	1.25	2.65508	1.8222e-32	1.09392e-32	LOC418423	XM_429578.5	XP_429578.1|4.2e-55|PREDICTED: uncharacterized protein LOC418423 [Gallus gallus]
395451	548.446	3435.55	2.65288	0	0	CXCL14	NM_204712.2	XP_017936663.1|1.9e-52|PREDICTED: C-X-C motif chemokine 14 [Manacus vitellinus]
419903	0.06	0.366	2.63893	1.02516e-08	1.22107e-08	PACSIN1	XM_015298991.2,XM_015298992.2,XM_418028.6	XP_418028.3|5.3e-263|PREDICTED: protein kinase C and casein kinase substrate in neurons protein 1 [Gallus gallus]
424316	6.543	38.926	2.6288	0	0	RIF1	BGI_novel_T004633,XM_015289867.2,XM_025152555.1,BGI_novel_T004634,XM_422162.6	XP_422162.4|0.0e+00|PREDICTED: telomere-associated protein RIF1 isoform X1 [Gallus gallus]
100858410	0.04	0.25	2.62866	7.01426e-07	9.31405e-07	PLPPR3	XM_003642869.4	XP_003642917.2|0.0e+00|PREDICTED: lipid phosphate phosphatase-related protein type 3 [Gallus gallus]
422660	48.956	299.796	2.62439	0	0	UGT2A1	XM_004941193.3,XM_015276390.2,XM_004941194.3	XP_004941251.1|0.0e+00|PREDICTED: UDP-glucuronosyltransferase 2B17 isoform X1 [Gallus gallus]
395971	5.42	33.113	2.61772	0	0	ADORA2B	NM_205087.1	NP_990418.1|3.7e-194|adenosine receptor A2b [Gallus gallus]
378912	1.74	10.566	2.61579	8.5887e-104	2.46555e-104	RGS2	NM_204395.2	NP_989726.1|1.4e-124|regulator of G-protein signaling 2 [Gallus gallus]
424220	6.143	37.27	2.608	0	0	IGFBP5	XM_422069.6	XP_422069.4|8.3e-160|PREDICTED: insulin-like growth factor-binding protein 5 [Gallus gallus]
418101	0.02	0.12	2.6079	4.97662e-05	7.51041e-05	TBXAS1	XM_025155784.1,XM_416334.6,XM_004937846.3	XP_416334.4|5.5e-296|PREDICTED: thromboxane-A synthase isoform X1 [Gallus gallus]
415439	4.43	24.35	2.60134	5.83786e-277	8.11842e-278	FGF7	XM_015291989.2,XM_015291987.2,XM_015291986.2,XM_025153833.1,XM_015291985.2,NM_001012525.1	NP_001012543.1|9.0e-111|fibroblast growth factor 7 [Gallus gallus]
107052201	0.086	0.52	2.59901	4.83273e-11	5.16052e-11	LOC107052201	XM_025141451.1,XM_015279706.2	XP_015135192.1|1.4e-167|PREDICTED: alpha-1-acid glycoprotein 1-like [Gallus gallus]
107050775	0.143	0.84	2.59891	1.75959e-13	1.69935e-13	LOC107050775	XM_025143827.1,XM_025143830.1,XM_025143828.1,XM_025143829.1	XP_015129973.1|1.5e-228|PREDICTED: LOW QUALITY PROTEIN: epidermal growth factor receptor kinase substrate 8-like protein 3, partial [Gallus gallus]
428953	0.03	0.173	2.59816	5.96626e-26	4.0778e-26	WNT8B	XM_025151997.1,XM_025151998.1	XP_015721972.1|3.8e-201|PREDICTED: protein Wnt-8b [Coturnix japonica]
428529	4.83	29.196	2.59778	0	0	DSG2	XM_025147912.1,XM_426083.6	XP_426083.4|0.0e+00|PREDICTED: desmoglein-2 [Gallus gallus]
428589	0.28	1.696	2.593	1.0376e-47	4.99315e-48	RHOU	XM_015284392.2	XP_005518721.1|4.0e-171|PREDICTED: rho-related GTP-binding protein RhoU [Pseudopodoces humilis]
419798	0.24	1.45	2.59185	4.0775e-63	1.60025e-63	DIXDC1	XM_015298304.2,XM_015298303.2,XM_015298302.2,BGI_novel_T008561,XM_004948150.3,XM_417934.6	XP_417934.3|0.0e+00|PREDICTED: dixin isoform X4 [Gallus gallus]
BGI_novel_G000085	0.233	1.376	2.58859	4.77157e-66	1.82305e-66	BGI_novel_G000085	BGI_novel_T002816
101751913	0.056	0.343	2.58684	1.22105e-06	1.64551e-06	C11orf97	XM_004938850.3,XM_015280532.2	XP_015136018.1|2.5e-138|PREDICTED: uncharacterized protein C11ORF97 isoform X2 [Gallus gallus]
419205	0.246	1.606	2.5843	3.38616e-57	1.4331e-57	OCSTAMP	BGI_novel_T007816,XM_015296720.2	XP_015152206.1|5.5e-261|PREDICTED: osteoclast stimulatory transmembrane protein [Gallus gallus]
421858	2.093	12.503	2.58233	3.24477e-204	5.88155e-205	HTR1B	NM_001172781.1,XM_015284634.2	NP_001166252.1|2.3e-217|5-hydroxytryptamine receptor 1B [Gallus gallus]
416068	0.183	0.926	2.58226	6.17759e-34	3.61227e-34	ACOX2	BGI_novel_T006090,XM_015293306.2,BGI_novel_T006091,XM_004944647.3,XM_004944646.3	XP_414406.1|0.0e+00|PREDICTED: peroxisomal acyl-coenzyme A oxidase 2 isoform X1 [Gallus gallus]
101749837	0.67	3.31	2.56433	1.7522e-32	1.05117e-32	LOC101749837	XM_015291113.2,XM_015291117.2,XM_015291114.2,XM_025153091.1,BGI_novel_T005013,XM_015291115.2,XM_025153092.1,XM_015291116.2	XP_015146602.1|2.5e-93|PREDICTED: uncharacterized protein LOC101749837 isoform X4 [Gallus gallus]
420129	0.716	4.193	2.56049	3.7183e-33	2.2036e-33	IFI30	XM_418246.5,BGI_novel_T009161	XP_418246.4|1.6e-216|PREDICTED: gamma-interferon-inducible lysosomal thiol reductase [Gallus gallus]
101750112	0.74	4.153	2.55341	6.13863e-269	8.74085e-270	LOC101750112	XM_015282060.2,BGI_novel_T001284,XM_015282062.2,XM_015282061.2	XP_015137546.1|0.0e+00|PREDICTED: phthiocerol/phenolphthiocerol synthesis polyketide synthase type I PpsD-like isoform X1 [Gallus gallus]
420561	23.02	134.09	2.5488	0	0	TFPI2	XM_015281937.2,XM_418662.6	XP_418662.2|1.1e-144|PREDICTED: tissue factor pathway inhibitor 2 isoform X2 [Gallus gallus]
107056413	0.086	0.49	2.5472	0.000117619	0.000184177	PTPRCAPL	XM_015301458.2	XP_020946510.1|3.7e-28|basic proline-rich protein isoform X1 [Sus scrofa]
431581	1.013	5.876	2.54585	1.13073e-51	5.10754e-52	HTR1A	NM_001170528.1	NP_001163999.1|6.9e-240|5-hydroxytryptamine receptor 1A [Gallus gallus]
101748485	0.07	0.41	2.54377	1.35581e-09	1.5498e-09	VWCE	XM_015286116.2,XM_025151180.1,XM_015286112.2,XM_015286120.2,XM_015286114.2,XM_015286119.2,XM_015286115.2,XM_015286121.2,XM_015286110.2	XP_015141596.1|0.0e+00|PREDICTED: von Willebrand factor C and EGF domain-containing protein isoform X1 [Gallus gallus]
415945	0.03	0.183	2.54377	8.67356e-05	0.000133745	SEMA3G	XM_025154687.1,XM_015292849.2	XP_015148335.1|0.0e+00|PREDICTED: semaphorin-3G [Gallus gallus]
771913	0.123	0.666	2.54377	1.35581e-09	1.5498e-09	TMEM51	XM_015297187.2,XM_015297185.2,XM_015297186.2,XM_025142688.1,XM_015297184.2	XP_015152670.1|3.4e-138|PREDICTED: transmembrane protein 51 [Gallus gallus]
421424	4.353	25.473	2.54205	0	0	KCNK5	XM_015283798.2,XM_419478.6	XP_419478.2|5.9e-283|PREDICTED: potassium channel subfamily K member 5 isoform X1 [Gallus gallus]
421153	0.73	4.233	2.53806	4.1127e-92	1.27125e-92	DENND2D	XM_419235.6	XP_419235.5|2.3e-270|PREDICTED: DENN domain-containing protein 2D [Gallus gallus]
100857803	0.233	1.32	2.52609	1.12447e-21	8.47087e-22	SHISA8	XM_003640380.4	XP_003640428.1|2.3e-219|PREDICTED: putative protein shisa-8 [Gallus gallus]
420537	0.106	0.613	2.52345	6.41821e-42	3.34072e-42	ADAM22	XM_025148404.1,XM_025148406.1,XM_025148403.1,XM_015281979.2,XM_015281978.2,XM_025148405.1,XM_015281975.2,XM_015281977.2,XM_015281974.2,XM_015281971.2	XP_015137457.1|0.0e+00|PREDICTED: disintegrin and metalloproteinase domain-containing protein 22 isoform X1 [Gallus gallus]
770898	5.57	31.65	2.5201	0	0	GATSL3	XM_015294923.2,XM_015294922.2	XP_015150408.1|9.1e-223|PREDICTED: GATS-like protein 3 isoform X1 [Gallus gallus]
107051217	4.286	24.853	2.51329	1.20376e-144	2.77e-145	LOC107051217	XM_025146201.1,XM_025146202.1,XM_025146203.1	EYC08446.1|6.6e-20|hypothetical protein Y032_0066g3770 [Ancylostoma ceylanicum]
100858964	0.15	0.836	2.5106	9.17275e-08	1.15453e-07	IL23A	XM_003643958.4	XP_003644006.3|4.1e-95|PREDICTED: translation initiation factor IF-2 [Gallus gallus]
417794	0.83	4.916	2.50979	3.42935e-284	4.69775e-285	ADAMTS20	XM_025154135.1,XM_015282451.2,BGI_novel_T000172,XM_015282450.2,XM_015282468.2,XM_015282444.2,BGI_novel_T000173	XP_015137930.1|0.0e+00|PREDICTED: A disintegrin and metalloproteinase with thrombospondin motifs 20 isoform X1 [Gallus gallus]
101747287	0.51	2.853	2.505	4.71058e-38	2.60366e-38	TMEM98	BGI_novel_T008876,XM_015299413.2,BGI_novel_T008875,XM_025144006.1,XM_015299412.2,XM_015299415.2	XP_015154898.1|2.1e-120|PREDICTED: transmembrane protein 98 [Gallus gallus]
768659	1.656	9.366	2.50216	0	0	CIDEA	NM_001195123.1,BGI_novel_T001652	NP_001182052.1|3.4e-118|cell death activator CIDE-A [Gallus gallus]
416032	0.456	2.55	2.50123	8.07027e-75	2.83006e-75	CHST13	XM_004944602.3,XM_001233229.5	XP_001233230.2|1.7e-191|PREDICTED: carbohydrate sulfotransferase 13 isoform X1 [Gallus gallus]
424409	0.036	0.2	2.49938	0.000745016	0.00125922	RGS16	NM_001277544.2,XM_015290274.2,XM_025152810.1	NP_001264473.1|1.3e-110|regulator of G-protein signaling 16 precursor [Gallus gallus]
107049890	0.04	0.226	2.49607	0.00028483	0.000462352	LOC107049890	XM_025151819.1	XP_015129289.1|6.9e-89|PREDICTED: tau-tubulin kinase 1-like isoform X2 [Gallus gallus]
425954	0.796	4.496	2.4948	8.13363e-61	3.2851e-61	SLC2A6	XM_423637.6,XM_025141409.1	XP_423637.3|3.3e-194|PREDICTED: solute carrier family 2, facilitated glucose transporter member 6 [Gallus gallus]
724081	1.203	6.7	2.49006	3.40531e-71	1.23663e-71	XKR8	NM_001044693.1	NP_001038158.1|6.0e-246|XK-related protein 8 [Gallus gallus]
420821	0.036	0.203	2.48289	8.40894e-10	9.51243e-10	DCDC2	XM_004939615.3,BGI_novel_T001504,XM_015275947.2,XM_004939618.3,XM_004939617.3,XM_004939614.3,BGI_novel_T001503,XM_015275946.2,XM_003640752.4	XP_003640800.2|1.4e-287|PREDICTED: doublecortin domain-containing protein 2 isoform X3 [Gallus gallus]
420628	8.443	46.963	2.47855	0	0	SNX10	XM_025147204.1,XM_015281467.1,NM_001030986.1,XM_015281468.2	XP_015136954.1|9.4e-112|PREDICTED: sorting nexin-10 isoform X2 [Gallus gallus]
417692	0.406	2.343	2.478	5.24673e-114	1.41456e-114	KIF21A	XM_015275797.2,XM_015275798.2,BGI_novel_T000121,XM_004934761.3,XM_415936.6,XM_004934759.3,BGI_novel_T000122,XM_004934760.3,BGI_novel_T000120,XM_015275800.2	XP_015131286.1|0.0e+00|PREDICTED: kinesin-like protein KIF21A isoform X7 [Gallus gallus]
100859280	0.086	0.493	2.47666	2.02295e-13	1.96169e-13	SLITRK5	XM_015274613.2	XP_015130099.1|0.0e+00|PREDICTED: SLIT and NTRK-like protein 5 [Gallus gallus]
107055422	0.173	0.926	2.47136	3.70665e-11	3.94266e-11	TAC3	XM_025145446.1,BGI_novel_T009800,XM_025145447.1,XM_015300406.2	XP_015155892.1|2.8e-70|PREDICTED: tachykinin-3 isoform X1 [Gallus gallus]
101752158	16.466	90.196	2.46833	0	0	LOC101752158	BGI_novel_T003259,NM_001318999.1	NP_001305928.1|2.6e-194|uncharacterized protein LOC101752158 [Gallus gallus]
770136	3.493	19.29	2.4683	0	0	ZNF503	XM_015288294.2	XP_021255297.1|0.0e+00|zinc finger protein 503 [Numida meleagris]
417245	0.103	0.58	2.46816	1.11564e-54	4.86542e-55	PAPPA	XM_415522.6,XM_025156099.1	XP_019476948.1|0.0e+00|PREDICTED: pappalysin-1 isoform X3 [Meleagris gallopavo]
416080	1.246	7.103	2.46349	0	0	ADAMTS9	XM_004944664.3,XM_414417.5,XM_004944666.3,XM_015293287.2,XM_004944671.3,BGI_novel_T006101	XP_004944728.1|0.0e+00|PREDICTED: A disintegrin and metalloproteinase with thrombospondin motifs 9 isoform X5 [Gallus gallus]
428437	10.846	59.41	2.45916	0	0	CHN2	XM_425997.6	XP_425997.2|2.2e-274|PREDICTED: beta-chimaerin [Gallus gallus]
414140	0.073	0.316	2.45357	1.53433e-14	1.42822e-14	AMY2A	XM_025152779.1,XM_025152789.1,XM_025152790.1,XM_025152781.1,XM_025152780.1,XM_025152785.1,XM_015290261.2,XM_025152782.1,XM_025152792.1,XM_015290259.2,XM_015290260.2,NM_001001473.2,XM_025152787.1,XM_025152783.1,XM_015290256.2,XM_025152791.1,XM_025152793.1,XM_025152788.1,XM_025152786.1	XP_010713945.1|1.2e-276|PREDICTED: pancreatic alpha-amylase [Meleagris gallopavo]
769286	0.263	1.443	2.44396	1.10133e-49	5.10751e-50	SALL4	XM_015296420.2,XM_025142271.1,XM_015296421.2,NM_001080872.1	NP_001074341.1|0.0e+00|sal-like protein 4 [Gallus gallus]
100857932	21.036	113.476	2.4435	0	0	LOC100857932	XM_025155899.1	XP_004950921.1|2.4e-110|PREDICTED: uncharacterized protein C1235.01-like [Gallus gallus]
420164	0.756	4.066	2.42812	3.39152e-174	6.8596e-175	CYP7B1	XM_025147742.1	XP_015138205.1|7.2e-274|PREDICTED: 25-hydroxycholesterol 7-alpha-hydroxylase, partial [Gallus gallus]
418479	11.87	63.32	2.42546	0	0	ADAMTS1	BGI_novel_T000666,XM_015299177.2	XP_015154663.1|0.0e+00|PREDICTED: A disintegrin and metalloproteinase with thrombospondin motifs 1 [Gallus gallus]
112533402	0.02	0.103	2.42284	0.000731264	0.0012343	LOC112533402	XM_025154941.1	XP_015149045.1|0.0e+00|PREDICTED: protocadherin gamma-A5-like [Gallus gallus]
415433	0.156	0.826	2.41824	5.29595e-51	2.42081e-51	SLC12A1	BGI_novel_T005507,XM_413814.6,XM_025154033.1,BGI_novel_T005508,XM_004943799.3	XP_004943856.2|0.0e+00|PREDICTED: solute carrier family 12 member 1 isoform X2 [Gallus gallus]
420774	0.25	1.333	2.41547	5.23787e-87	1.68001e-87	HECW1	XM_015281620.2,XM_015281617.2,XM_015281616.2,XM_015281615.2,XM_015281621.2,XM_025147586.1,XM_015281619.2,XM_025147587.1,XM_418870.6,XM_025147588.1	XP_019472255.1|0.0e+00|PREDICTED: E3 ubiquitin-protein ligase HECW1 isoform X4 [Meleagris gallopavo]
101747454	2.5	13.2	2.41417	4.22807e-76	1.4695e-76	BLB2	NM_001318995.2	NP_001305924.2|5.3e-149|uncharacterized protein LOC101747454 precursor [Gallus gallus]
419019	2.293	11.51	2.41371	1.00605e-159	2.16237e-160	ME3	XM_003640570.4,XM_015280299.2	KFU94742.1|3.9e-308|hypothetical protein M959_12023, partial [Chaetura pelagica]
395299	9.23	48.82	2.4095	0	0	SOCS3	NM_204600.1	OWK54405.1|3.9e-121|Suppressor of cytokine signaling 3 [Lonchura striata domestica]
101749221	0.026	0.133	2.40627	5.29066e-05	8.00193e-05	IL12RB1	XM_025144369.1,XM_025144370.1,XM_025144371.1	XP_015742289.1|0.0e+00|PREDICTED: interleukin-12 receptor subunit beta-1 [Coturnix japonica]
419089	0.016	0.103	2.40627	0.000259212	0.000418828	GUCY2F	XM_015280866.2	KPP68994.1|0.0e+00|retinal guanylyl cyclase 2-like [Scleropages formosus]
426055	0.04	0.223	2.40627	5.29066e-05	8.00193e-05	CAPSL	BGI_novel_T009322,XM_015277515.2,XM_025144989.1,XM_015277514.2,XM_015277516.2,XM_004937187.3,XM_025144992.1,XM_004937185.3,XM_004937186.3,XM_001232404.4,BGI_novel_T009323,XM_025144991.1	OPJ82478.1|1.4e-117|calcyphosin-like protein isoform B [Patagioenas fasciata monilis]
424792	0.38	1.76	2.40136	1.91701e-59	7.85021e-60	SLC19A3	XM_422610.6,XM_025153689.1	XP_422610.3|1.9e-275|PREDICTED: thiamine transporter 2 isoform X1 [Gallus gallus]
420067	1.003	5.22	2.3869	3.41504e-51	1.55465e-51	PRAM1	XM_004948674.3,XM_004948673.3	XP_004948730.2|1.4e-236|PREDICTED: PML-RARA-regulated adapter molecule 1 isoform X2 [Gallus gallus]
771648	0.236	1.226	2.38551	6.54822e-11	7.04411e-11	SSTR1	NM_001113167.1	NP_001106638.1|3.3e-223|somatostatin receptor type 1 [Gallus gallus]
395096	32.003	166.683	2.38507	0	0	TNFRSF6B	XM_004947134.3,XM_417434.6	XP_004947191.1|1.5e-194|PREDICTED: tumor necrosis factor receptor superfamily member 6B isoform X1 [Gallus gallus]
395420	5.896	30.756	2.3792	0	0	F13A1	NM_204685.1,BGI_novel_T001538	XP_019469304.1|0.0e+00|PREDICTED: coagulation factor XIII A chain isoform X2 [Meleagris gallopavo]
417385	6.83	35.356	2.37387	0	0	NOTUM	XM_015295353.2	XP_015150839.1|1.6e-300|PREDICTED: palmitoleoyl-protein carboxylesterase NOTUM [Gallus gallus]
100859316	0.036	0.17	2.36542	4.07478e-10	4.5409e-10	ATP2C2	BGI_novel_T005786,XM_004944264.3,BGI_novel_T005787	XP_004944321.2|0.0e+00|PREDICTED: LOW QUALITY PROTEIN: calcium-transporting ATPase type 2C member 2 [Gallus gallus]
419389	0.163	0.806	2.36445	3.80234e-06	5.29405e-06	LOC419389	XM_025142647.1,XM_015297098.1,XM_025142646.1	XP_019396798.1|7.1e-22|PREDICTED: uncharacterized protein LOC109314224 [Crocodylus porosus]
428365	6.306	32.24	2.36249	0	0	HEY1	XM_015282862.2,XM_025148013.1	XP_015138348.1|3.5e-189|PREDICTED: hairy/enhancer-of-split related with YRPW motif protein 1 [Gallus gallus]
396045	0.06	0.303	2.35736	2.52697e-09	2.92371e-09	GLI1	XM_025145281.1,XM_025145279.1,NM_001305245.1,XM_025145280.1	NP_001292174.1|0.0e+00|zinc finger protein GLI1 [Gallus gallus]
421454	0.076	0.38	2.34737	9.02924e-05	0.00013968	LRRC73	NM_001277634.1	NP_001264563.1|7.8e-165|leucine-rich repeat-containing protein 73 [Gallus gallus]
415312	0.373	1.893	2.34626	1.17473e-35	6.7128e-36	LOC415312	XM_429315.4	XP_429315.2|2.5e-202|PREDICTED: uncharacterized protein LOC415312 [Gallus gallus]
427884	0.52	2.6	2.34516	7.5007e-09	8.87168e-09	HIST1H4D	XM_425458.6	XP_012903387.1|2.6e-52|PREDICTED: uncharacterized protein LOC101679762 [Mustela putorius furo]
429810	0.593	3.003	2.34039	1.04656e-58	4.34443e-59	RCC1	XM_015297714.2	XP_015153200.1|5.3e-243|PREDICTED: regulator of chromosome condensation [Gallus gallus]
408180	0.056	0.283	2.33227	4.27249e-09	5.00014e-09	B3GAT1L	NM_001293310.1,XM_025147112.1,XM_416565.5,XM_025147106.1,XM_025147110.1	XP_021155520.1|2.7e-203|galactosylgalactosylxylosylprotein 3-beta-glucuronosyltransferase 1 isoform X1 [Columba livia]
417596	6.393	23.4	2.33042	0	0	ZSWIM7	NM_001197134.1,BGI_novel_T007627,XM_015295772.1,XM_025141961.1,NM_001197135.1,BGI_novel_T007625,BGI_novel_T007626	XP_021271221.1|1.3e-74|zinc finger SWIM domain-containing protein 7 isoform X1 [Numida meleagris]
417391	3.263	16.246	2.32535	5.36617e-258	7.97558e-259	TOM1L1	XM_415646.6,XM_004946156.3	XP_004946213.1|2.7e-270|PREDICTED: TOM1-like protein 1 isoform X2 [Gallus gallus]
430480	0.136	0.686	2.31932	6.88999e-28	4.51293e-28	IKBKE	XM_015299067.2,XM_025143897.1,XM_428036.6,XM_015299066.2	XP_015154552.1|0.0e+00|PREDICTED: inhibitor of nuclear factor kappa-B kinase subunit epsilon isoform X2 [Gallus gallus]
421155	0.14	0.7	2.31464	2.62183e-25	1.81758e-25	PPFIA4	XM_015298802.1,XM_015298801.1,XM_015298800.1,XM_015298803.1	XP_015154289.1|0.0e+00|PREDICTED: liprin-alpha-4 isoform X4 [Gallus gallus]
404774	3.75	18.353	2.30789	0	0	SNTB1	NM_001005798.1,XM_015283067.2	XP_015138553.1|1.8e-260|PREDICTED: beta-1-syntrophin isoform X1 [Gallus gallus]
423090	0.026	0.14	2.30673	3.15596e-05	4.67618e-05	KCNQ1	XM_421022.6,XM_015286680.2	XP_015142166.1|0.0e+00|PREDICTED: potassium voltage-gated channel subfamily KQT member 1 isoform X2 [Gallus gallus]
418639	0.103	0.2	2.29704	1.27737e-05	1.84143e-05	PRPS2	XM_015273666.2,XM_015273663.2,BGI_novel_T000774,BGI_novel_T000772,NM_001006264.1,BGI_novel_T000773	NP_001006264.1|1.8e-181|ribose-phosphate pyrophosphokinase 2 [Gallus gallus]
112530164	0.316	1.546	2.29584	6.21442e-13	6.1528e-13	LOC112530164	XM_025142812.1	XP_007067266.1|1.0e-70|PREDICTED: sulfotransferase family cytosolic 2B member 1-like [Chelonia mydas]
426557	0.18	0.893	2.29223	3.75276e-31	2.30777e-31	RGS8	XM_025153224.1,XM_015290454.2,XM_015290457.2,XM_015290451.2,XM_015290450.2,XM_025153222.1,XM_015290452.2,XM_015290453.2,BGI_novel_T004753,BGI_novel_T004752,XM_015290456.2,XM_015290449.2,XM_015290455.2	XP_015145937.1|4.8e-96|PREDICTED: regulator of G-protein signaling 8 isoform X3 [Gallus gallus]
419070	4.316	21.163	2.29027	0	0	GDPD5	XM_015280979.2,XM_015280978.2,BGI_novel_T001119,XM_015280977.2,XM_015280976.2,NM_001305150.1,XM_025150751.1,BGI_novel_T001120,BGI_novel_T001121	XP_019467931.1|0.0e+00|PREDICTED: glycerophosphodiester phosphodiesterase domain-containing protein 5 isoform X2 [Meleagris gallopavo]
395069	0.02	0.096	2.28597	0.000153578	0.000242689	COL2A1	NM_204426.1,XM_025145274.1	XP_015705870.1|0.0e+00|PREDICTED: collagen alpha-1(II) chain isoform X1 [Coturnix japonica]
424992	0.053	0.263	2.28597	0.000153578	0.000242689	GPR160	NM_001277472.1,XM_015291665.2	XP_015147151.1|1.4e-200|PREDICTED: probable G-protein coupled receptor 160 isoform X1 [Gallus gallus]
416630	1.74	9.163	2.28521	1.39151e-49	6.4706e-50	SOCS1	NM_001137648.1,XM_015294233.2	NP_001131120.1|4.6e-114|suppressor of cytokine signaling 1 [Gallus gallus]
100859365	4.22	20.276	2.28312	0	0	VEPH1	BGI_novel_T005369,XM_004943551.2,XM_004943554.3,XM_004943550.2,XM_015291796.1,XM_004943553.2,XM_025153547.1,XM_015291794.1,XM_015291797.1,XM_004943557.3,XM_015291798.2,XM_003641782.4,XM_015291791.1,XM_015291793.1,XM_015291790.1,XM_015291792.1,XM_004943556.3,BGI_novel_T005368,BGI_novel_T005367	XP_004943613.2|5.5e-110|PREDICTED: ventricular zone-expressed PH domain-containing protein homolog 1 isoform X10 [Gallus gallus]
112529932	0.223	1.083	2.27416	6.64119e-11	7.14549e-11	TCTEX1D1	XM_025153174.1	XP_422530.3|7.4e-73|PREDICTED: tctex1 domain-containing protein 1 [Gallus gallus]
417193	3.106	14.426	2.27125	8.81934e-115	2.3686e-115	PTGES	XM_015279469.2,XM_015279470.2,XM_015279465.2,XM_015279464.1,NM_001194983.1,XM_015279466.2,XM_025156073.1,XM_025156072.1,XM_015279468.2,XM_015279472.2,XM_015279467.2	XP_015734682.1|2.6e-82|PREDICTED: prostaglandin E synthase isoform X1 [Coturnix japonica]
374166	2.05	9.83	2.26599	1.20728e-102	3.49333e-103	P2RX4	NM_204291.1	NP_989622.1|2.1e-228|P2X purinoceptor 4 [Gallus gallus]
419897	0.143	0.7	2.25919	5.92049e-17	5.09999e-17	TCP11	XM_025143871.1,BGI_novel_T008804,XM_025143872.1,XM_418022.6,XM_025143873.1,BGI_novel_T008803,XM_025143874.1	XP_418022.3|3.9e-264|PREDICTED: T-complex protein 11 homolog isoform X1 [Gallus gallus]
395415	0.073	0.33	2.25426	3.80517e-06	5.29957e-06	MGAT4C	XM_025143662.1,NM_204681.2,XM_015298688.2,XM_015298687.2,XM_015298686.1,XM_025143661.1,XM_015298685.2,XM_015298684.2,XM_015298689.2,XM_015298690.2	NP_990012.1|2.9e-248|alpha-1,3-mannosyl-glycoprotein 4-beta-N-acetylglucosaminyltransferase C precursor [Gallus gallus]
418529	0.043	0.22	2.25426	3.80517e-06	5.29957e-06	RIPK4	XM_004934565.3	XP_004934622.2|0.0e+00|PREDICTED: receptor-interacting serine/threonine-protein kinase 4 [Gallus gallus]
418791	9.243	44.183	2.254	0	0	ABCC4	BGI_novel_T000908,XM_015274498.2,XM_025150273.1,NM_001030819.1,BGI_novel_T000907,XM_025150275.1	NP_001025990.1|0.0e+00|multidrug resistance-associated protein 4 [Gallus gallus]
112530215	0.51	2.413	2.25015	1.61447e-23	1.16823e-23	LOC112530215	XM_025143116.1	XP_009462886.1|4.6e-97|PREDICTED: semaphorin-4A [Nipponia nippon]
423016	0.256	1.206	2.24354	5.28336e-10	5.91519e-10	DRD4	NM_001142849.2	NP_001136321.1|1.9e-223|D(4) dopamine receptor [Gallus gallus]
422610	18.526	87.27	2.23753	0	0	GPAT3	NM_001031145.1,XM_015276269.1,XM_015276270.1	XP_015131756.1|6.5e-254|PREDICTED: glycerol-3-phosphate acyltransferase 3 isoform X2 [Gallus gallus]
425940	0.29	1.356	2.23409	1.85114e-10	2.03866e-10	LOC425940	XM_025142802.1	XP_021230396.1|2.5e-76|pulmonary surfactant-associated protein B [Numida meleagris]
107052707	17.44	81.356	2.23055	0	0	CEBPD	XM_015282650.2	XP_021243918.1|2.4e-202|CCAAT/enhancer-binding protein delta isoform X1 [Numida meleagris]
BGI_novel_G000142	0.156	0.73	2.22663	5.60653e-24	4.01025e-24	BGI_novel_G000142	BGI_novel_T005986
419030	0.11	0.523	2.22184	3.38562e-15	3.07828e-15	USP35	XM_015280871.2,XM_417222.6,XM_025146936.1,XM_015280870.2	XP_417222.2|0.0e+00|PREDICTED: ubiquitin carboxyl-terminal hydrolase 35 [Gallus gallus]
BGI_novel_G000070	4.993	23.126	2.21393	0	0	BGI_novel_G000070	BGI_novel_T002317
107049024	0.283	1.22	2.20463	7.53162e-14	7.17357e-14	EDPE	NM_001319340.2,XM_015298393.2	NP_001306269.1|8.2e-192|protein TsetseEP-like [Gallus gallus]
418447	0.506	2.32	2.20234	4.41888e-48	2.11818e-48	ILDR2	XM_015298162.2,XM_416658.6,XM_025144560.1,XM_025144563.1	XP_416658.4|0.0e+00|PREDICTED: immunoglobulin-like domain-containing receptor 2 isoform X1 [Gallus gallus]
395668	0.006	0.033	2.19982	8.94482e-05	0.000138249	TENM1	XM_015278190.2,XM_015278191.2,NM_204862.1,XM_015278189.2	XP_019343330.1|0.0e+00|PREDICTED: teneurin-1 [Alligator mississippiensis]
421219	0.07	0.326	2.19982	2.22362e-06	3.04374e-06	TLR15	NM_001037835.1	NP_001032924.1|0.0e+00|toll-like receptor 15 [Gallus gallus]
427339	10.12	44.543	2.19813	0	0	LPAR1	NM_001115082.1,XM_015280609.2,XM_015280610.2	NP_001108554.1|9.5e-212|lysophosphatidic acid receptor 1 [Gallus gallus]
100858765	0.233	1.07	2.19286	5.15442e-10	5.76762e-10	GIPR	XM_025144504.1	XP_009471933.1|7.6e-200|PREDICTED: F-box only protein 46 [Nipponia nippon]
417946	1.786	7.876	2.18775	1.14003e-10	1.2439e-10	HIST1H46	NM_001037845.1	XP_008172414.1|8.2e-51|PREDICTED: histone H3 type 3-like [Chrysemys picta bellii]
417950	1.786	7.876	2.18775	1.14003e-10	1.2439e-10	HIST2H4B	NM_001037843.1	XP_008172414.1|8.2e-51|PREDICTED: histone H3 type 3-like [Chrysemys picta bellii]
421437	0.053	0.21	2.1864	1.92793e-10	2.12482e-10	TCTE1	XM_004935389.3,XM_015283792.2,XM_025148868.1,XM_025148869.1	XP_015139278.1|0.0e+00|PREDICTED: T-complex-associated testis-expressed protein 1 isoform X1 [Gallus gallus]
107057318	4.276	19.08	2.18307	0	0	LOC107057318	XM_015296731.2,XM_025142411.1,XM_417378.6,XM_025142410.1,XM_025142412.1,XM_025142413.1,BGI_novel_T007812,XM_025142409.1,XM_025142408.1	XP_417378.2|1.1e-155|PREDICTED: fat storage-inducing transmembrane protein 2 [Gallus gallus]
100857247	0.2	0.903	2.18265	5.50051e-12	5.62778e-12	TUBA4A	XM_003641644.4	XP_003641692.2|6.0e-283|PREDICTED: tubulin alpha-4A chain [Gallus gallus]
432368	105.57	476.716	2.17991	0	0	SNAI2	XM_419196.6	XP_006272860.1|1.8e-157|PREDICTED: zinc finger protein SNAI2 [Alligator mississippiensis]
423477	40.54	182.836	2.1768	0	0	TNFAIP2	XM_015287936.1	XP_015143422.1|0.0e+00|PREDICTED: tumor necrosis factor alpha-induced protein 2 [Gallus gallus]
418640	0.326	1.47	2.17519	1.26335e-52	5.63567e-53	FRMPD4	XM_015273871.2,XM_015273860.2,XM_015273863.2,XM_416838.6,BGI_novel_T000775,XM_015273878.2	XP_015129364.1|0.0e+00|PREDICTED: FERM and PDZ domain-containing protein 4 isoform X5 [Gallus gallus]
101750666	4.196	18.903	2.17317	0	0	KIAA1755	BGI_novel_T007892,XM_004947188.3,XM_015296590.2	XP_015152076.1|0.0e+00|PREDICTED: uncharacterized protein KIAA1755 homolog isoform X2 [Gallus gallus]
428954	0.013	0.06	2.1718	1.07003e-05	1.53363e-05	PKD2L1	XM_426509.6	XP_426509.4|0.0e+00|PREDICTED: polycystic kidney disease 2-like 1 protein [Gallus gallus]
771117	1.693	7.546	2.16279	2.5658e-44	1.28911e-44	SCARA3	XM_025149129.1	XP_013917983.1|6.4e-42|PREDICTED: collagen alpha-1(V) chain-like [Thamnophis sirtalis]
100857885	8.68	39.86	2.16142	0	0	KIAA1549	XM_025155839.1,XM_025155848.1,XM_015287584.2,BGI_novel_T000343,XM_015287593.2,XM_025155830.1,XM_025155864.1,BGI_novel_T000342,XM_015287597.2,BGI_novel_T000344	XP_015143083.1|0.0e+00|PREDICTED: UPF0606 protein KIAA1549 homolog isoform X3 [Gallus gallus]
418666	0.243	1.083	2.15208	1.48864e-14	1.38507e-14	CSF2RA	NM_001312662.1	NP_001299591.1|3.9e-232|granulocyte-macrophage colony-stimulating factor receptor subunit alpha-like precursor [Gallus gallus]
422763	0.096	0.436	2.14847	4.47919e-07	5.87145e-07	CWH43	XM_004936041.3,XM_004936039.3,XM_015285506.2,XM_004936040.3,XM_420716.6	XP_420716.3|0.0e+00|PREDICTED: PGAP2-interacting protein isoform X1 [Gallus gallus]
420894	0.14	0.616	2.14323	1.73341e-10	1.90539e-10	SERPINB1	XM_015282193.2	XP_015137679.1|5.7e-214|PREDICTED: leukocyte elastase inhibitor isoform X1 [Gallus gallus]
100857439	0.203	0.876	2.13868	0.000607227	0.00101598	LOC100857439	XM_015289440.2	XP_012890639.1|6.6e-70|PREDICTED: LOW QUALITY PROTEIN: uncharacterized protein LOC106000001 [Dipodomys ordii]
424314	13.566	59.536	2.13867	0	0	NMI	XM_025152680.1	XP_015145346.1|7.5e-253|PREDICTED: N-myc-interactor [Gallus gallus]
107049123	717.313	3129.06	2.13845	0	0	ECM1	BGI_novel_T008692,XM_015298661.2	XP_003642711.2|1.8e-185|PREDICTED: extracellular matrix protein 1 [Gallus gallus]
417012	0.036	0.113	2.13497	5.1589e-05	7.79407e-05	HORMAD2	XM_015294913.2,XM_015294910.2,XM_015294906.2,XM_015294908.2,XM_025155702.1,XM_025155699.1,XM_025155704.1,XM_015294907.2,XM_015294911.2,XM_025155701.1,XM_015294914.2,XM_015294915.2,XM_025155703.1,XM_025155700.1	XP_015733476.1|3.2e-193|PREDICTED: HORMA domain-containing protein 2 isoform X1 [Coturnix japonica]
427435	0.016	0.07	2.13459	1.71785e-05	2.50356e-05	SPEF2	XM_025144817.1,XM_025144812.1,XM_025144813.1,XM_025144815.1,XM_015277513.2,XM_025144811.1,XM_025144814.1,XM_025144816.1	XP_015132999.1|0.0e+00|PREDICTED: sperm flagellar protein 2 [Gallus gallus]
396315	0.8	3.283	2.12919	6.14763e-93	1.8913e-93	IGFBP2	NM_205359.1,XM_025152153.1,XM_015289790.2,XM_025152151.1,XM_015289791.2,XM_025152152.1,XM_015289789.2	XP_015145275.1|2.1e-119|PREDICTED: insulin-like growth factor-binding protein 2 isoform X1 [Gallus gallus]
424313	2.563	10.646	2.12588	1.10154e-177	2.19131e-178	RBM43	XM_004943032.3,XM_025152570.1,XM_004943031.3,XM_004943030.3,XM_422159.6,BGI_novel_T004632,XM_025152571.1,XM_025152569.1,XM_015289869.2	XP_004943087.1|2.5e-193|PREDICTED: RNA-binding protein 43 isoform X1 [Gallus gallus]
423514	0.62	2.716	2.12488	1.63934e-240	2.58303e-241	KCNH5	XM_421414.5,BGI_novel_T003859,BGI_novel_T003857,BGI_novel_T003858,XM_015287902.2	XP_015143388.1|0.0e+00|PREDICTED: potassium voltage-gated channel subfamily H member 5 isoform X2 [Gallus gallus]
BGI_novel_G000255	0.206	0.886	2.12403	3.28506e-12	3.34126e-12	BGI_novel_G000255	BGI_novel_T009642
420501	4.056	17.88	2.11831	0	0	KIAA1217	XM_015282039.2,BGI_novel_T001297,XM_015282040.2,XM_015282035.1,XM_015282030.2,BGI_novel_T001296,XM_004939226.3,XM_015282025.2,XM_015282031.2,BGI_novel_T001298,XM_004939230.3,XM_015282034.1,XM_015282038.2,XM_015282026.2,XM_015282036.2,XM_004939231.3,XM_015282029.2,XM_015282037.2,BGI_novel_T001295,XM_004939233.3,XM_015282032.2,XM_015282024.2,XM_015282033.2,XM_015282027.2,BGI_novel_T001294,XM_418603…	XP_015137514.1|0.0e+00|PREDICTED: sickle tail protein homolog isoform X6 [Gallus gallus]
422662	71.423	306.57	2.11721	0	0	SULT1E1	BGI_novel_T002956,XM_420616.6	XP_420616.3|6.9e-193|PREDICTED: sulfotransferase 1 family member D1 [Gallus gallus]
770379	9.643	41.013	2.11314	4.90709e-235	7.84408e-236	SMIM3	NM_001302128.1,XM_001233713.5	XP_009633723.1|5.1e-22|PREDICTED: small integral membrane protein 3 [Egretta garzetta]
101750594	0.446	1.916	2.10819	1.10107e-08	1.31445e-08	MSMB	XM_004942118.3	XP_004942175.2|3.2e-64|PREDICTED: beta-microseminoprotein-like [Gallus gallus]
422034	0.523	2.246	2.10625	2.13816e-47	1.0347e-47	TDH	XM_420039.6	XP_420039.1|2.3e-216|PREDICTED: L-threonine 3-dehydrogenase, mitochondrial [Gallus gallus]
421569	7.363	30.626	2.10609	0	0	RNASET2	XM_015284065.2,NM_001039491.1,XM_015284063.2,XM_015284064.2,XM_015284066.2,XM_015284062.2	NP_001034580.1|6.1e-163|ribonuclease T2 precursor [Gallus gallus]
424248	0.073	0.346	2.10603	4.42195e-17	3.7889e-17	SEMA5B	XM_015289993.2,XM_025152596.1,XM_004942929.3,XM_015289989.2,XM_004942927.3,XM_015289990.2,XM_015289991.2,XM_015289992.2	XP_015145478.1|0.0e+00|PREDICTED: semaphorin-5B isoform X4 [Gallus gallus]
395138	8.383	37.406	2.10359	0	0	ST3GAL6	XM_015295681.2,BGI_novel_T000579,XM_025152479.1,XM_015295670.2,XM_015295674.2,XM_015295735.2,NM_204479.1,BGI_novel_T000576,XM_025152408.1,XM_015295701.2,XM_015295703.2,XM_025152445.1,BGI_novel_T000577,BGI_novel_T000581,XM_015295729.2,XM_015295740.2,XM_015295708.2,XM_025152425.1,XM_015295705.2,XM_015295693.2,XM_025152591.1,XM_015295716.2,BGI_novel_T000575,XM_025152159.1,BGI_novel_T000580,XM_015295…	XP_015151202.1|4.1e-196|PREDICTED: type 2 lactosamine alpha-2,3-sialyltransferase isoform X4 [Gallus gallus]
421711	0.62	2.643	2.09985	3.13723e-87	1.00494e-87	PTPRK	BGI_novel_T002327,XM_015284456.2,XM_025149399.1,XM_025149393.1,XM_015284457.2,BGI_novel_T002328,XM_025149397.1,XM_025149394.1,XM_025149398.1,XM_025149395.1,XM_025149396.1,XM_015284454.2,XM_015284453.2	XP_015713994.1|0.0e+00|PREDICTED: receptor-type tyrosine-protein phosphatase kappa isoform X1 [Coturnix japonica]
395263	39.383	160.653	2.08434	5.20202e-134	1.25977e-134	DBI	NM_204576.1	NP_989907.1|9.0e-43|acyl-CoA-binding protein [Gallus gallus]
396157	0.053	0.22	2.08434	3.33692e-11	3.54107e-11	NTRK2	XM_015280257.2,XM_015280251.2,XM_015280256.2,XM_015280254.2,XM_025144684.1,XM_015280253.2,NM_205231.1,XM_015280252.2,XM_015280249.2,XM_015280255.2	XP_015135741.1|7.1e-300|PREDICTED: BDNF/NT-3 growth factors receptor isoform X6 [Gallus gallus]
424011	0.06	0.266	2.08434	1.81313e-18	1.4959e-18	ABCA12	XM_015289304.2,XM_025152382.1,XM_015289303.2	XP_015144789.1|0.0e+00|PREDICTED: ATP-binding cassette sub-family A member 12 isoform X1 [Gallus gallus]
428264	0.073	0.18	2.08434	0.000730355	0.00123247	IL10	XM_025143715.1,NM_001004414.2	NP_001004414.2|1.1e-95|interleukin-10 precursor [Gallus gallus]
396165	2.293	9.683	2.08219	1.33406e-77	4.59782e-78	BMP4	NM_205237.3	NP_990568.3|1.3e-237|bone morphogenetic protein 4 precursor [Gallus gallus]
BGI_novel_G000243	1.046	4.433	2.08178	4.71249e-129	1.1755e-129	BGI_novel_G000243	BGI_novel_T009375
421937	27.936	114.896	2.07856	0	0	ODC1	XM_015276041.2,NM_001167766.1	NP_001161238.1|1.6e-269|ornithine decarboxylase [Gallus gallus]
100858707	0.096	0.283	2.07627	1.71037e-07	2.18547e-07	CPXM1	XM_015301329.2,BGI_novel_T003242	XP_015156815.1|0.0e+00|PREDICTED: probable carboxypeptidase X1 [Gallus gallus]
BGI_novel_G000244	1.34	5.646	2.07456	6.97016e-120	1.81401e-120	BGI_novel_G000244	BGI_novel_T009376
395375	3.236	13.52	2.06897	1.68317e-106	4.74438e-107	BCKDHB	NM_204657.1	NP_989988.1|7.5e-230|2-oxoisovalerate dehydrogenase subunit beta, mitochondrial precursor [Gallus gallus]
418295	22.82	95.506	2.06363	0	0	C1R	BGI_novel_T000505,XM_416518.6	XP_416518.2|0.0e+00|PREDICTED: complement C1r subcomponent [Gallus gallus]
107055358	0.403	1.683	2.06297	3.62118e-09	4.2221e-09	LOC107055358	XM_015300083.1	XP_015155569.1|1.1e-170|PREDICTED: proline-rich receptor-like protein kinase PERK2 [Gallus gallus]
415860	0.093	0.386	2.05573	1.45353e-08	1.7467e-08	CDH1	XM_015292581.2,NM_001039258.2,BGI_novel_T005835	NP_001034347.2|0.0e+00|cadherin-1 precursor [Gallus gallus]
396185	96.256	397.386	2.05376	0	0	CEBPB	NM_205253.2	NP_990584.1|1.2e-191|CCAAT/enhancer-binding protein beta [Gallus gallus]
421157	1.363	5.656	2.05089	9.80191e-54	4.32159e-54	TMEM9	XM_004934842.2,XM_419239.6	XP_419239.2|4.1e-118|PREDICTED: transmembrane protein 9 isoform X1 [Gallus gallus]
100857635	0.32	1.323	2.04781	2.53426e-10	2.80466e-10	TBXA2R	XM_015299773.2,XM_025144378.1,XM_015299775.2,XM_025144379.1,XM_015299772.2,XM_015299774.2	XP_015155258.1|3.2e-208|PREDICTED: thromboxane A2 receptor [Gallus gallus]
420581	0.09	0.32	2.04781	5.79777e-06	8.14704e-06	ICA1	XM_025148455.1,XM_015281899.2,XM_015281896.2,XM_015281900.2,XM_015281897.2,XM_418682.5,XM_015281898.2	XP_015137384.1|0.0e+00|PREDICTED: islet cell autoantigen 1 isoform X2 [Gallus gallus]
418346	0.07	0.226	2.0437	1.67185e-05	2.43409e-05	IGSF11	NM_001318422.1,XM_015294662.2	NP_001305351.1|4.5e-240|immunoglobulin superfamily member 11 precursor [Gallus gallus]
428995	0.283	1.213	2.04276	1.40566e-20	1.09105e-20	VWC2L	XM_025152407.1,BGI_novel_T004330,XM_004942464.3,XM_426552.5,XM_025152406.1,XM_004942465.3,BGI_novel_T004331	XP_426552.3|8.2e-146|PREDICTED: von Willebrand factor C domain-containing protein 2-like [Gallus gallus]
374109	7.42	30.44	2.04247	0	0	SEMA3F	NM_204258.1,BGI_novel_T005956	XP_003210066.1|0.0e+00|PREDICTED: semaphorin-3F isoform X2 [Meleagris gallopavo]
395128	0.133	0.543	2.03854	4.85182e-05	7.314e-05	HES4	NM_001005848.2,NM_204472.3	NP_989803.1|5.5e-173|transcription factor HES-4 isoform 2 [Gallus gallus]
417967	2.276	9.326	2.03781	2.33158e-139	5.48641e-140	PLBD1	XM_015289354.2,XM_416206.6	XP_021234647.1|0.0e+00|phospholipase B-like 1 [Numida meleagris]
374051	0.483	1.98	2.03754	1.00032e-21	7.5252e-22	HOXA1	XM_003640697.4	XP_003640745.1|4.3e-193|PREDICTED: homeobox protein Hox-A1 [Gallus gallus]
777528	0.09	0.356	2.03224	1.79914e-08	2.17698e-08	PDE1B	XM_025145608.1,XM_025145609.1,XM_025145610.1,BGI_novel_T009730	XP_015742360.1|1.0e-229|PREDICTED: calcium/calmodulin-dependent 3',5'-cyclic nucleotide phosphodiesterase 1B isoform X1 [Coturnix japonica]
427224	2.363	9.37	2.02923	2.31437e-110	6.37441e-111	CD274	XM_025145072.1,XM_025145073.1,XM_025145075.1,XM_025145076.1,XM_025145074.1,XM_424811.6	XP_424811.4|4.9e-208|PREDICTED: CD276 antigen homolog isoform X1 [Gallus gallus]
422776	0.02	0.05	2.02294	0.000410082	0.000676239	ATP8A1	XM_015285473.2,XM_015285474.2,XM_025149963.1,XM_015285476.2,XM_004936074.3	XP_014450414.1|0.0e+00|PREDICTED: phospholipid-transporting ATPase IA isoform X5 [Alligator mississippiensis]
768789	0.113	0.45	2.02294	1.02299e-11	1.06027e-11	FOXE1	XM_015280733.2	AEE88205.1|1.3e-162|forkhead-related transcriptional factor E1 [Meleagris gallopavo]
421939	0.633	2.59	2.02187	3.81613e-39	2.06723e-39	ATP6V1C2	XM_004935758.3,XM_025148941.1,XM_015276083.2,XM_004935760.3,XM_419951.6,XM_025148942.1,XM_025148940.1,XM_004935759.3,XM_025148944.1,XM_025148943.1	XP_012983735.1|1.7e-216|PREDICTED: V-type proton ATPase subunit C 2 [Melopsittacus undulatus]
426448	0.966	3.903	2.0197	4.63094e-42	2.4037e-42	SNTA1	XM_015296797.2	XP_015152283.1|2.1e-275|PREDICTED: alpha-1-syntrophin [Gallus gallus]
396512	1.733	6.966	2.01795	3.90004e-80	1.31496e-80	FOS	NM_205508.1	NP_990839.1|6.2e-209|proto-oncogene c-Fos [Gallus gallus]
101751828	51.716	207.343	2.01295	0	0	ZFP36L1	NM_001319031.1	NP_001305960.1|7.5e-196|zinc finger protein 36, C3H1 type-like 1 [Gallus gallus]
396466	5.093	20.393	2.01114	4.29747e-118	1.13898e-118	NGF	NM_001293109.1,BGI_novel_T008799,NM_001293108.1,XM_015298897.2,XM_025143679.1	XP_010722663.1|6.9e-162|PREDICTED: beta-nerve growth factor isoform X1 [Meleagris gallopavo]
424244	0.036	0.11	2.01034	9.48658e-06	1.35337e-05	SLC15A2	XM_025152205.1,XM_015289996.2,XM_015289995.2,XM_025152206.1,XM_004942922.3,XM_015289994.2,NM_001319028.1,XM_004942925.3	XP_004942982.1|0.0e+00|PREDICTED: solute carrier family 15 member 2 isoform X5 [Gallus gallus]
419710	2.04	8.06	2.00532	5.30193e-218	9.07038e-219	CDON	XM_417853.6,XM_015298103.2,XM_025143258.1	XP_417853.3|0.0e+00|PREDICTED: cell adhesion molecule-related/down-regulated by oncogenes [Gallus gallus]
100859784	2.556	10.203	2.00347	6.31821e-235	1.01261e-235	LYPD1	XM_003641592.4	NP_001073574.1|3.0e-93|G-protein coupled receptor 39 [Gallus gallus]
112530405	0.26	1.046	2.00161	1.80104e-16	1.57166e-16	LOC112530405	XM_025144240.1	XP_013384968.1|3.0e-19|PREDICTED: collagen alpha-1(VII) chain-like [Lingula anatina]
424835	0.246	0.976	2.00018	4.24352e-32	2.55985e-32	TRPM2	XM_015277074.2	XP_015132560.1|0.0e+00|PREDICTED: transient receptor potential cation channel subfamily M member 2 [Gallus gallus]
396452	13.54	53.846	1.99932	0	0	PRNP	NM_205465.2,XM_015297300.2	NP_990796.2|2.2e-167|major prion protein homolog preproprotein [Gallus gallus]
421851	6.413	25.556	1.99874	0	0	SH3BGRL2	XM_419869.6	XP_419869.5|5.9e-168|PREDICTED: SH3 domain-binding glutamic acid-rich-like protein 2 [Gallus gallus]
395997	0.273	1.126	1.99628	2.41558e-32	1.45315e-32	EPHA5	XM_015276139.2,BGI_novel_T002953,BGI_novel_T002949,XM_015276140.2,XM_015276143.2,BGI_novel_T002950,XM_015276147.2,XM_025149518.1,XM_025149517.1,XM_015276151.2,XM_015276144.2,XM_015276141.2,XM_015276145.2,XM_025149519.1,XM_015276142.2,XM_015276150.2,XM_015276149.2,XM_015276146.2,BGI_novel_T002951,XM_015276148.2,NM_205105.2,BGI_novel_T002952	NP_990436.2|0.0e+00|ephrin type-A receptor 5 precursor [Gallus gallus]
112532702	0.876	3.566	1.9909	8.09085e-16	7.2168e-16	LOC112532702	XM_025151929.1,BGI_novel_T000521	XP_015156136.1|1.6e-103|PREDICTED: uncharacterized protein LOC107055500 [Gallus gallus]
420703	9.24	36.9	1.98377	0	0	CDCP1	XM_025147502.1,BGI_novel_T001413,XM_418802.6,XM_015281743.2	XP_021244559.1|0.0e+00|CUB domain-containing protein 1 isoform X1 [Numida meleagris]
BGI_novel_G000086	0.55	2.18	1.98347	4.50313e-75	1.5754e-75	BGI_novel_G000086	BGI_novel_T002817
101750199	2.303	9.043	1.97843	2.37223e-132	5.8089e-133	PALM	XM_004948830.3,XM_004948833.3,XM_015299887.2,XM_015299888.2,XM_015299886.1,NM_001167690.2	NP_001161162.2|1.5e-188|paralemmin-1 [Gallus gallus]
107050161	0.396	1.56	1.97742	0.000230139	0.000370035	RENBP	XM_025146163.1,XM_025146164.1	XP_015129427.1|3.0e-56|PREDICTED: LOW QUALITY PROTEIN: N-acylglucosamine 2-epimerase [Gallus gallus]
408026	0.043	0.173	1.97742	0.000230139	0.000370035	TPH2	NM_001001301.1,XM_025147087.1,XM_025147089.1,XM_025147091.1	XP_014818973.1|2.8e-250|PREDICTED: tryptophan 5-hydroxylase 2 [Calidris pugnax]
418294	45.96	180.49	1.97569	0	0	C1S	NM_001030777.1	NP_001025948.1|0.0e+00|complement C1s subcomponent precursor [Gallus gallus]
417802	28.986	113.873	1.97373	0	0	ANO6	XM_416045.5,XM_004937550.3,XM_004937549.3	XP_004937606.1|0.0e+00|PREDICTED: anoctamin-6 isoform X2 [Gallus gallus]
422106	0.193	0.743	1.96698	7.22827e-08	9.04229e-08	LOC422106	XM_429916.6	XP_429916.3|7.6e-130|PREDICTED: uncharacterized protein LOC422106 [Gallus gallus]
423156	1.2	4.696	1.96416	5.17825e-219	8.81575e-220	SLC1A2	XM_015286990.2,XM_015286992.2,XM_015286994.2,XM_015286995.2,XM_015286991.2,BGI_novel_T003520,NM_001012899.1	NP_001012917.1|0.0e+00|excitatory amino acid transporter 2 [Gallus gallus]
769337	1.146	4.783	1.95936	5.97729e-93	1.83766e-93	PRR16	XM_001232592.5,XM_004949621.3	XP_001232593.3|1.8e-173|PREDICTED: protein Largen [Gallus gallus]
428092	0.616	2.383	1.95881	3.45852e-13	3.38309e-13	FUT4	NM_001031487.1	NP_001026658.1|1.3e-217|alpha-(1,3)-fucosyltransferase 4 [Gallus gallus]
101747660	2.663	10.3	1.95644	1.75059e-107	4.90895e-108	LOC101747660	XM_015295564.2	XP_015151050.1|6.3e-243|PREDICTED: probable low-specificity L-threonine aldolase 2 [Gallus gallus]
101749651	11.58	44.626	1.95389	0	0	BORCS6	XM_004940390.3	XP_004940447.1|1.1e-210|PREDICTED: uncharacterized protein C17orf59 homolog [Gallus gallus]
419613	0.856	3.323	1.95134	1.95155e-68	7.2493e-69	RSPO1	XM_025142990.1,XM_417760.6,NM_001318444.1,XM_004947757.3,XM_004947756.3	KQL60641.1|2.0e-154|R-spondin-1 [Amazona aestiva]
374022	0.123	0.523	1.94684	8.68241e-06	1.23594e-05	DPYSL4	XM_015288986.2,XM_015288985.2,NM_204197.2	XP_005528911.1|7.0e-134|PREDICTED: dihydropyrimidinase-related protein 4 isoform X2 [Pseudopodoces humilis]
424652	8.836	33.873	1.94681	0	0	GLIS1	XM_015291201.2,BGI_novel_T004967,BGI_novel_T004966	XP_015146687.1|0.0e+00|PREDICTED: zinc finger protein GLIS1 [Gallus gallus]
419458	2.176	8.296	1.92901	7.65789e-64	2.98312e-64	FBLIM1	BGI_novel_T008036,XM_025142662.1,XM_025142661.1,XM_025142664.1,XM_015297176.2,XM_025142665.1,XM_025142663.1,XM_015297180.2,BGI_novel_T008034,BGI_novel_T008035	XP_015152666.1|1.3e-141|PREDICTED: filamin-binding LIM protein 1 isoform X2 [Gallus gallus]
101751551	2.326	8.83	1.92869	5.26105e-123	1.35171e-123	FAM83G	XM_004945207.3	XP_004945264.1|0.0e+00|PREDICTED: protein FAM83G [Gallus gallus]
101749643	1.086	4.123	1.9244	6.85417e-61	2.76122e-61	ZNF385A	XM_025145530.1,BGI_novel_T009843,XM_025145529.1	XP_021239042.1|8.2e-136|zinc finger protein 385A [Numida meleagris]
107055335	0.186	0.666	1.92084	0.000374547	0.000614916	TMIGD2	BGI_novel_T009048,XM_025144387.1,XM_015299828.2,XM_015299829.2	XP_015155315.1|7.5e-150|PREDICTED: transmembrane and immunoglobulin domain-containing protein 2 isoform X4 [Gallus gallus]
419276	0.076	0.293	1.92084	0.000374547	0.000614916	BPIL	XM_015296452.2,XM_015296453.2	XP_015151939.1|0.0e+00|PREDICTED: bactericidal permeability-increasing protein-like isoform X2 [Gallus gallus]
421629	0.046	0.17	1.92084	0.000374547	0.000614916	LRP11	XM_015284273.2	XP_015139759.1|4.8e-284|PREDICTED: low-density lipoprotein receptor-related protein 11 [Gallus gallus]
431569	0.116	0.433	1.91441	1.13888e-14	1.05491e-14	RHOBTB3	XM_429123.6,XM_004949384.3,XM_004949383.3	XP_015705168.1|0.0e+00|PREDICTED: rho-related BTB domain-containing protein 3 isoform X6 [Coturnix japonica]
771089	0.566	2.12	1.91441	3.65607e-21	2.79068e-21	RPESL	XM_001234391.5	XP_001234392.3|8.8e-175|PREDICTED: somatomedin-B and thrombospondin type-1 domain-containing protein-like [Gallus gallus]
421039	0.086	0.336	1.91268	4.2522e-05	6.37207e-05	CEP76	XM_419124.6	XP_419124.3|0.0e+00|PREDICTED: centrosomal protein of 76 kDa isoform X2 [Gallus gallus]
101751260	0.193	0.723	1.91216	4.54573e-16	4.02064e-16	SCEL	XM_025146769.1,XM_025146770.1,BGI_novel_T000930,XM_025146767.1,XM_015277292.2,XM_025146768.1	XP_015132781.1|3.1e-227|PREDICTED: sciellin isoform X2 [Gallus gallus]
769469	0.31	1.173	1.91031	3.50072e-37	1.95677e-37	PDE4D	XM_004937258.3,XM_015277590.2,BGI_novel_T009371,BGI_novel_T009373,XM_015277589.2,XM_025145252.1,XM_025145253.1,BGI_novel_T009372,XM_015277592.2,XM_004937252.3,XM_004937259.3,XM_004937253.2,XM_004937257.3,BGI_novel_T009370,XM_004937256.3,BGI_novel_T009369,BGI_novel_T009368,XM_025145251.1	XP_010578855.1|0.0e+00|PREDICTED: cAMP-specific 3',5'-cyclic phosphodiesterase 4D [Haliaeetus leucocephalus]
424700	15.26	57.336	1.90928	0	0	PDE4B	XM_015291031.2,XM_015291030.2,XM_015291032.2,NM_001031291.2,XM_015291029.2	XP_015146515.1|0.0e+00|PREDICTED: cAMP-specific 3',5'-cyclic phosphodiesterase 4B isoform X1 [Gallus gallus]
423603	1.296	4.82	1.9032	7.60592e-65	2.93758e-65	PHYHIPL	XM_025151505.1,NM_001199504.1,XM_015287963.2	XP_010399119.1|9.7e-203|phytanoyl-CoA hydroxylase-interacting protein-like isoform X2 [Corvus cornix cornix]
424676	2.836	10.526	1.89878	4.93824e-112	1.35089e-112	CYP2J23	NM_001329481.1,XM_025152884.1	NP_001316410.1|2.5e-249|cytochrome P450 2J23 [Gallus gallus]
418934	0.263	0.98	1.89421	3.73748e-59	1.54217e-59	WASF3	BGI_novel_T001015,BGI_novel_T001013,XM_025146845.1,XM_004938779.3,BGI_novel_T001014,XM_015278963.2,XM_025146844.1,XM_004938782.3,XM_025146846.1,XM_417128.6,XM_004938781.3	XP_417128.2|5.6e-296|PREDICTED: wiskott-Aldrich syndrome protein family member 3 isoform X1 [Gallus gallus]
419757	0.123	0.446	1.89293	2.24813e-13	2.18378e-13	TTC36	XM_015297994.2,NM_001278062.1	XP_015153480.1|5.3e-96|PREDICTED: tetratricopeptide repeat protein 36 isoform X1 [Gallus gallus]
418839	1.053	3.993	1.88485	6.52478e-54	2.86994e-54	ENOX1	XM_025146792.1,BGI_novel_T000960,XM_025146789.1,XM_025146791.1,BGI_novel_T000961,XM_025146790.1,XM_015276675.2	XP_015132161.1|0.0e+00|PREDICTED: ecto-NOX disulfide-thiol exchanger 1 isoform X2 [Gallus gallus]
424905	0.293	1.08	1.88081	2.66959e-21	2.02993e-21	MB21D2	XM_422716.6	XP_009881670.1|3.1e-288|PREDICTED: protein MB21D2 [Charadrius vociferus]
776186	30.873	112.983	1.88055	0	0	TMEM158	XM_001235309.5	XP_001235310.3|8.7e-174|PREDICTED: transmembrane protein 158 [Gallus gallus]
100858647	1.27	4.606	1.87789	5.82406e-12	5.9697e-12	LOC100858647	XM_003641514.4	XP_021255474.1|2.4e-64|beta-microseminoprotein-like isoform X1 [Numida meleagris]
418421	0.523	1.87	1.87706	1.16229e-70	4.23534e-71	LOC418421	XM_025144333.1,XM_015297700.2,XM_025144310.1,BGI_novel_T000630,XM_025144330.1,BGI_novel_T000629,XM_004938296.3,XM_015297705.2,XM_416635.6,XM_015297753.2,XM_015297751.2,XM_015297738.2,XM_004938297.3,XM_015297731.2	XP_015153217.1|0.0e+00|PREDICTED: transmembrane protease serine 7-like isoform X5 [Gallus gallus]
BGI_novel_G000300	4.94	17.636	1.8769	7.51416e-21	5.7871e-21	BGI_novel_G000300	BGI_novel_T010086
395405	18.596	67.483	1.87548	0	0	TWIST2	XM_015289113.2,NM_204679.1	NP_990010.1|4.1e-83|twist-related protein 2 [Gallus gallus]
777583	0.113	0.42	1.87283	2.25146e-05	3.30416e-05	FGR	NM_001109787.1	NP_001103257.1|0.0e+00|proto-oncogene tyrosine-protein kinase Yrk [Gallus gallus]
769750	2.326	8.473	1.86824	1.86148e-85	6.03637e-86	LRRC75B	XM_025155519.1	XP_015130944.1|1.3e-195|PREDICTED: leucine-rich repeat-containing protein 75B [Gallus gallus]
395152	2.7	9.823	1.86697	1.88748e-126	4.78668e-127	AXIN2	NM_204491.1	NP_989822.1|0.0e+00|axin-2 [Gallus gallus]
396043	1.446	5.246	1.86314	2.83119e-153	6.26185e-154	JAG1	XM_415035.6	XP_415035.4|0.0e+00|PREDICTED: protein jagged-1 isoform X1 [Gallus gallus]
417927	0.063	0.143	1.86195	0.000606947	0.00101538	ANKS1B	XM_025148286.1,XM_015284710.2,XM_025148284.1,XM_025148297.1,NM_001252062.2,XM_015284697.2,XM_025148295.1,XM_015284704.2,XM_015284714.2,XM_025148292.1,XM_015284725.2,XM_015284705.2,XM_015284723.2,XM_025148302.1,XM_025148288.1,XM_025148285.1,XM_015284716.2	XP_015140202.1|0.0e+00|PREDICTED: ankyrin repeat and sterile alpha motif domain-containing protein 1B isoform X6 [Gallus gallus]
419546	0.096	0.356	1.86047	3.11356e-07	4.0315e-07	UBXN11	XM_015297567.2	XP_015153053.1|1.0e-231|PREDICTED: UBX domain-containing protein 11 isoform X1 [Gallus gallus]
415830	3.423	12.33	1.85476	1.19383e-179	2.35505e-180	JPH3	XM_015292658.2	XP_021264150.1|0.0e+00|junctophilin-3 [Numida meleagris]
417346	0.16	0.633	1.85373	5.91255e-09	6.96007e-09	CD7	XM_025141589.1,XM_025141587.1,XM_429498.4,NM_001348572.1,XM_025141590.1,XM_025141586.1,XM_025141591.1,XM_025141588.1,XM_004946095.3	XP_004946152.1|2.3e-144|PREDICTED: T-cell antigen CD7 isoform X2 [Gallus gallus]
421068	0.48	1.73	1.84987	2.19564e-26	1.48972e-26	ABHD3	XM_004939768.3,XM_015277966.2	XP_015710924.1|3.2e-238|PREDICTED: phospholipase ABHD3 [Coturnix japonica]
427369	0.106	0.38	1.84333	3.69255e-10	4.10803e-10	LOC427369	XM_430505.6,XM_025144869.1,XM_015280720.2,XM_025144870.1,XM_015280725.2	XP_015136211.1|2.3e-92|PREDICTED: uncharacterized protein LOC427369 isoform X5 [Gallus gallus]
428282	0.05	0.173	1.83923	7.27533e-05	0.000111262	ADAM11	XM_015299265.1	XP_015154751.1|0.0e+00|PREDICTED: disintegrin and metalloproteinase domain-containing protein 11 isoform X1 [Gallus gallus]
421438	5.583	19.81	1.8381	7.36876e-140	1.72934e-140	NFKBIE	XM_419490.6	XP_419490.3|1.7e-208|PREDICTED: NF-kappa-B inhibitor epsilon [Gallus gallus]
421032	48.376	172.353	1.83658	0	0	IMPA2	XM_419118.5	XP_419118.1|6.0e-164|PREDICTED: inositol monophosphatase 2 [Gallus gallus]
431636	0.443	1.56	1.82761	7.19817e-60	2.9402e-60	SLC46A2	XM_004949513.3,XM_429188.6,BGI_novel_T009603	XP_429188.3|3.9e-253|PREDICTED: thymic stromal cotransporter homolog [Gallus gallus]
101751890	0.236	0.846	1.82375	2.10969e-20	1.64453e-20	LOC101751890	XM_025147754.1	XP_015128889.1|0.0e+00|PREDICTED: nascent polypeptide-associated complex subunit alpha, muscle-specific form-like, partial [Gallus gallus]
418532	21.686	76.46	1.82255	0	0	C2CD2	XM_015301138.2,XM_025145501.1,BGI_novel_T000719,XM_025145498.1,XM_004934572.3,XM_416741.6,BGI_novel_T000720	XP_416741.3|0.0e+00|PREDICTED: C2 domain-containing protein 2 isoform X1 [Gallus gallus]
420827	1.81	6.433	1.82022	2.06397e-252	3.11053e-253	RNF144B	XM_015275952.2,XM_004939623.3,XM_025147646.1,BGI_novel_T001508,XM_418918.6,XM_004939624.3	XP_004939680.1|3.0e-190|PREDICTED: E3 ubiquitin-protein ligase RNF144B isoform X1 [Gallus gallus]
420580	2.413	8.486	1.81773	4.01248e-192	7.63177e-193	GLCCI1	XM_015281400.2,BGI_novel_T001336,NM_001012855.2	NP_001012873.2|0.0e+00|glucocorticoid-induced transcript 1 protein [Gallus gallus]
770004	46.61	162.58	1.81143	0	0	CA9	XM_004937157.3,XM_001233319.5	XP_001233320.2|9.3e-232|PREDICTED: carbonic anhydrase 9 isoform X2 [Gallus gallus]
418818	4.296	15	1.80897	6.24887e-133	1.52367e-133	KLF5	XM_417013.5	XP_417013.5|6.1e-264|PREDICTED: Krueppel-like factor 5 [Gallus gallus]
770397	1.79	6.23	1.80456	8.69245e-50	4.02216e-50	C23H1orf216	XM_015297803.2,BGI_novel_T008336	XP_001233734.1|6.7e-137|PREDICTED: UPF0500 protein C1orf216 homolog [Gallus gallus]
424666	7.746	26.993	1.80434	3.47948e-302	4.4988e-303	PLPP3	NM_001130488.2	NP_001123960.2|3.1e-180|phospholipid phosphatase 3 [Gallus gallus]
772088	0.523	1.806	1.80423	6.75894e-07	8.96519e-07	BCL2L15	XM_001233930.5	XP_001233931.1|8.5e-86|PREDICTED: bcl-2-like protein 15 [Gallus gallus]
770271	0.023	0.076	1.80132	0.000441923	0.000730399	LOC770271	XM_025149127.1,XM_001232670.4	XP_001232671.3|3.4e-256|PREDICTED: uncharacterized protein LOC770271 [Gallus gallus]
107055336	0.283	0.976	1.80055	6.19525e-06	8.7236e-06	SHD	XM_025144426.1	XP_015155316.1|2.4e-134|PREDICTED: SH2 domain-containing adapter protein D [Gallus gallus]
769291	1.143	3.953	1.79864	2.76587e-72	9.93497e-73	STK32C	XM_015289018.2,XM_015289019.2	XP_011588264.1|1.1e-227|PREDICTED: serine/threonine-protein kinase 32C isoform X2 [Aquila chrysaetos canadensis]
422320	0.226	0.85	1.79724	4.35886e-20	3.4286e-20	LOC422320	XM_420296.6,XM_025149943.1,XM_015278584.2	XP_010713651.1|0.0e+00|PREDICTED: ligand of Numb protein X 2-like isoform X1 [Meleagris gallopavo]
107055361	0.416	1.45	1.79706	3.78012e-07	4.92606e-07	LOC107055361	XM_015300113.2	XP_015155599.1|9.0e-125|PREDICTED: early endosome antigen 1-like [Gallus gallus]
395970	1393.22	4785.86	1.79368	0	0	FTH1	NM_205086.1	NP_990417.1|3.8e-101|ferritin heavy chain [Gallus gallus]
427335	1.72	5.953	1.79197	6.59943e-95	2.00424e-95	UGCG	XM_424914.6	XP_424914.2|1.1e-231|PREDICTED: ceramide glucosyltransferase [Gallus gallus]
BGI_novel_G000016	0.253	0.87	1.78888	8.13607e-10	9.197e-10	BGI_novel_G000016	BGI_novel_T000523
374192	12.63	43.373	1.78527	0	0	DUSP1	NM_001085359.1	NP_001078828.1|4.7e-210|dual specificity protein phosphatase 1 [Gallus gallus]
428997	10.32	35.536	1.78232	2.43495e-298	3.19888e-299	ACKR3	XM_015289178.2,BGI_novel_T004347,XM_025152261.1,BGI_novel_T004346,NM_001083362.1	OXB61686.1|2.0e-211|hypothetical protein ASZ78_000711 [Callipepla squamata]
420931	0.113	0.373	1.77622	2.28731e-09	2.63787e-09	SEMA5A	XM_015282266.2,XM_015282264.2,XM_015282269.2,XM_015282268.2,XM_015282265.2,XM_025147720.1,XM_419016.6,XM_015282267.2	XP_013037476.1|0.0e+00|PREDICTED: semaphorin-5A isoform X1 [Anser cygnoides domesticus]
428576	1.203	4.086	1.76729	3.77906e-50	1.74471e-50	DLK2	XM_015283773.1,XM_004935407.3,XM_015283772.2	XP_004935464.1|1.3e-256|PREDICTED: protein delta homolog 2 isoform X1 [Gallus gallus]
427245	0.606	2.106	1.76715	6.99459e-24	5.01618e-24	FAM189A2	XM_025144868.1,XM_025144867.1,XM_424828.6,XM_025144866.1	XP_424828.4|1.4e-305|PREDICTED: protein FAM189A2 [Gallus gallus]
BGI_novel_G000118	0.656	2.23	1.76569	9.2024e-82	3.07404e-82	BGI_novel_G000118	BGI_novel_T005016
427971	2.02	6.79	1.74919	1.53403e-264	2.22577e-265	ADAMTS5	XM_425541.6	XP_425541.5|0.0e+00|PREDICTED: LOW QUALITY PROTEIN: A disintegrin and metalloproteinase with thrombospondin motifs 5 [Gallus gallus]
770495	0.633	2.133	1.74882	4.20312e-30	2.64819e-30	SLC13A3	XM_003642481.4	XP_003642529.1|0.0e+00|PREDICTED: solute carrier family 13 member 3 [Gallus gallus]
417643	7.76	26.036	1.7488	0	0	BCAS3	XM_015296146.2,XM_415889.6,XM_004946733.3,XM_015296147.2,XM_004946735.3,XM_004946731.3,BGI_novel_T007677,XM_015296145.2,XM_004946728.3,XM_004946730.3,XM_004946732.3,XM_004946729.3	XP_004946786.1|0.0e+00|PREDICTED: breast carcinoma-amplified sequence 3 isoform X2 [Gallus gallus]
418310	0.056	0.18	1.7473	4.99899e-05	7.54727e-05	STYK1	XM_015294273.2,XM_004938145.3,XM_004938148.3,XM_015294294.2,XM_015294300.2,XM_015294290.2,XM_004938146.3,XM_004938147.3,XM_416534.6,XM_015294293.2,XM_015294301.2	XP_416534.4|9.2e-246|PREDICTED: tyrosine-protein kinase STYK1 [Gallus gallus]
100859440	0.59	1.976	1.74439	3.60601e-89	1.13861e-89	C1orf167	BGI_novel_T008084,XM_025142566.1,XM_004947511.3,XM_025142567.1	XP_004947570.1|0.0e+00|PREDICTED: uncharacterized protein C1orf167 homolog isoform X2 [Gallus gallus]
418296	1.993	6.576	1.74368	1.86272e-19	1.49344e-19	RBP5	NM_001278040.1	XP_005486088.1|2.7e-76|PREDICTED: retinol-binding protein 5 [Zonotrichia albicollis]
373887	0.19	0.633	1.73459	1.07233e-11	1.11207e-11	FZD4	NM_204099.1	NP_989430.1|0.0e+00|frizzled-4 precursor [Gallus gallus]
107054431	0.603	1.99	1.73287	6.00296e-12	6.15721e-12	LOC107054431	XM_025154657.1	XP_015148840.1|1.2e-29|PREDICTED: uncharacterized protein LOC107054430 [Gallus gallus]
418589	8.09	28.776	1.73242	0	0	GK	BGI_novel_T000748,BGI_novel_T000745,XM_003640511.4,BGI_novel_T000746,BGI_novel_T000749,XM_015302218.2,XM_015302211.2,BGI_novel_T000747,XM_003640510.4,BGI_novel_T000744	XP_003640558.2|0.0e+00|PREDICTED: glycerol kinase isoform X2 [Gallus gallus]
395719	7.143	23.46	1.73162	2.66995e-62	1.05784e-62	TK1	NM_204898.1	NP_990229.1|1.4e-125|thymidine kinase, cytosolic [Gallus gallus]
419088	17.146	56.506	1.73124	0	0	TSKU	BGI_novel_T001095,NM_001005346.1	NP_001005346.1|5.4e-212|tsukushin precursor [Gallus gallus]
770384	0.123	0.403	1.7307	5.01992e-08	6.21816e-08	HCN2	XM_003642867.4	XP_003642915.1|0.0e+00|PREDICTED: potassium/sodium hyperpolarization-activated cyclic nucleotide-gated channel 2 [Gallus gallus]
769957	3.77	12.49	1.73006	5.76261e-113	1.56442e-113	ISLR	XM_015279034.2,XM_015279035.2,XM_015279036.2,XM_001233272.5	XP_001233273.1|2.5e-247|PREDICTED: immunoglobulin superfamily containing leucine-rich repeat protein [Gallus gallus]
420325	0.486	1.946	1.72948	2.35387e-51	1.06814e-51	KCNQ3	XM_015283118.2,BGI_novel_T001885,XM_015283119.2,XM_015283117.2	XP_015138603.1|0.0e+00|PREDICTED: potassium voltage-gated channel subfamily KQT member 3 isoform X1 [Gallus gallus]
421915	0.026	0.083	1.7282	0.000847889	0.00144226	MYT1L	XM_015284940.1,XM_015284937.2,XM_015284939.1,XM_004940500.2,XM_025149026.1,XM_004940502.2,XM_015284941.1,XM_004940501.2,XM_004940510.2,XM_015284942.1,XM_015284938.1,XM_004940505.2,XM_004940506.2	XP_004940563.2|0.0e+00|PREDICTED: myelin transcription factor 1-like protein isoform X6 [Gallus gallus]
107055695	0.163	0.53	1.72238	4.22985e-05	6.33682e-05	LOC107055695	XM_025143336.1	XP_015156136.1|2.4e-77|PREDICTED: uncharacterized protein LOC107055500 [Gallus gallus]
419791	0.143	0.47	1.72177	0.000465652	0.000770973	C24H11orf34	XM_429703.6	XP_429703.2|2.4e-99|PREDICTED: uncharacterized protein C11ORF34 [Gallus gallus]
420895	14.096	46.373	1.71949	0	0	SERPINB6L	XM_025147268.1,NM_001006377.1,XM_015282170.2	XP_015137656.1|3.2e-213|PREDICTED: serpin B6 isoform X1 [Gallus gallus]
772256	0.493	1.66	1.71905	8.11187e-07	1.08069e-06	MORN5	BGI_novel_T007240,XM_001235418.5,XM_015279840.2,BGI_novel_T007241,XM_015279839.2,XM_015279841.2	XP_015135327.1|1.2e-147|PREDICTED: MORN repeat-containing protein 5 isoform X4 [Gallus gallus]
426765	0.103	0.346	1.71382	3.17633e-10	3.52449e-10	APCDD1	NM_001012941.2	NP_001012959.1|0.0e+00|protein APCDD1 precursor [Gallus gallus]
395352	0.186	0.616	1.71237	0.000141374	0.000222816	DPF1	NM_204640.1	NP_989971.1|6.5e-232|zinc finger protein neuro-d4 [Gallus gallus]
431336	3.286	10.856	1.71117	8.50371e-248	1.30631e-248	DUSP16	XM_015290885.2,XM_428887.6,BGI_novel_T000440,XM_015290874.2,XM_015290877.2,BGI_novel_T000441	XP_428887.3|0.0e+00|PREDICTED: dual specificity protein phosphatase 16 [Gallus gallus]
427341	0.223	0.73	1.70727	2.42714e-08	2.95856e-08	TMEM215	XM_004949523.3	XP_004949580.1|7.2e-136|PREDICTED: transmembrane protein 215 [Gallus gallus]
112531303	0.393	1.306	1.70209	2.35937e-09	2.72294e-09	LOC112531303	BGI_novel_T010043,XM_025146266.1,XM_025146267.1	OXB53290.1|7.7e-152|hypothetical protein ASZ78_016840 [Callipepla squamata]
395594	3.236	10.496	1.7001	6.55655e-120	1.70364e-120	HAS2	NM_204806.2	XP_015711723.1|0.0e+00|PREDICTED: hyaluronan synthase 2 isoform X1 [Coturnix japonica]
373981	0.146	0.516	1.69905	7.37762e-06	1.04591e-05	HPSE	NM_204167.1,XM_025149456.1	NP_989498.1|4.2e-285|heparanase precursor [Gallus gallus]
418651	0.14	0.51	1.69627	1.33343e-15	1.19742e-15	SHROOM2	XM_004938410.3,XM_025146616.1,XM_025146615.1,XM_025146614.1	XP_015742363.1|0.0e+00|PREDICTED: protein Shroom2 isoform X2 [Coturnix japonica]
770581	0.85	2.71	1.69413	1.4043e-20	1.08971e-20	SLC5A10	XM_004945212.3,XM_001233918.5,BGI_novel_T006457,XM_015294429.2,BGI_novel_T006458,XM_015294428.2,XM_015294425.2,BGI_novel_T006454,XM_015294427.2,XM_015294426.2,BGI_novel_T006459,XM_004945208.3,BGI_novel_T006456,BGI_novel_T006453,XM_004945215.3,XM_025155300.1,XM_004945214.3,XM_004945213.3,BGI_novel_T006455	XP_004945270.1|0.0e+00|PREDICTED: sodium/glucose cotransporter 5 isoform X3 [Gallus gallus]
419195	6.556	20.156	1.6888	6.11019e-78	2.09444e-78	PKIG	XM_025142191.1,XM_417373.6,BGI_novel_T007810,XM_025142192.1,XM_015296364.1,BGI_novel_T007809,NM_001302151.1	XP_417373.1|7.6e-40|PREDICTED: cAMP-dependent protein kinase inhibitor gamma isoform X1 [Gallus gallus]
428499	0.483	1.533	1.68841	3.76519e-08	4.63575e-08	CMBLL	XM_004935120.3	KQK75044.1|1.7e-146|carboxymethylenebutenolidase [Amazona aestiva]
420185	3.153	10.653	1.68768	3.32927e-89	1.04985e-89	UBE2W	XM_015282785.2,XM_015282784.2,NM_001199481.1	XP_011837389.1|1.3e-87|PREDICTED: ubiquitin-conjugating enzyme E2 W isoform X3 [Mandrillus leucophaeus]
414893	0.83	2.676	1.6866	2.86491e-80	9.64757e-81	GRIA1	NM_001001774.1,XM_015293756.2,XM_015293755.2	XP_013031453.1|0.0e+00|PREDICTED: glutamate receptor 1 isoform X1 [Anser cygnoides domesticus]
418110	3.156	10.113	1.68476	0	0	KDM7A	XM_015287459.2,XM_015287467.2	XP_015722525.1|0.0e+00|PREDICTED: lysine-specific demethylase 7A isoform X2 [Coturnix japonica]
417597	10.876	26.113	1.68451	9.55329e-205	1.7257e-205	TTC19	BGI_novel_T007629,XM_025141999.1,XM_004946653.3,XM_015295843.2,BGI_novel_T007624,BGI_novel_T007628,XM_015295842.2	XP_015151328.1|2.6e-213|PREDICTED: tetratricopeptide repeat protein 19, mitochondrial isoform X1 [Gallus gallus]
426068	0.396	1.266	1.6832	1.16224e-63	4.52991e-64	CELSR1	XM_423746.6,BGI_novel_T000124	XP_009461144.1|0.0e+00|PREDICTED: cadherin EGF LAG seven-pass G-type receptor 1 [Nipponia nippon]
414845	0.816	2.596	1.67976	2.08125e-30	1.30394e-30	CDH3	XM_003641956.4	XP_003642004.3|0.0e+00|PREDICTED: B-cadherin [Gallus gallus]
423316	2.216	7.073	1.67574	2.14149e-134	5.17267e-135	EGLN3	XM_421233.5	XP_421233.3|6.8e-141|PREDICTED: egl nine homolog 3 [Gallus gallus]
395586	5.78	18.57	1.67327	3.21344e-216	5.57094e-217	TSPAN18	NM_204801.1,BGI_novel_T003528,BGI_novel_T003530,BGI_novel_T003529,BGI_novel_T003531	NP_990132.1|5.1e-141|tetraspanin-18 [Gallus gallus]
421973	17.986	56.863	1.66981	0	0	UBXN2A	XM_015284974.1,XM_015284975.2,NM_001031094.1,XM_015284977.2	XP_015140460.1|2.8e-169|PREDICTED: UBX domain-containing protein 2A isoform X1 [Gallus gallus]
415600	0.04	0.126	1.6693	0.000400518	0.000659719	ADAMTS19	XM_413968.6,XM_004949266.3	XP_004949323.1|0.0e+00|PREDICTED: A disintegrin and metalloproteinase with thrombospondin motifs 19 isoform X2 [Gallus gallus]
422403	0.256	0.8	1.6693	5.46912e-10	6.13453e-10	LRAT	XM_420371.6	XP_420371.2|1.1e-127|PREDICTED: lecithin retinol acyltransferase [Gallus gallus]
427264	0.136	0.423	1.6693	0.000121687	0.000190827	ADAMTSL5	XM_003642878.4,XM_015299969.2,XM_015299970.2	XP_015155456.1|3.0e-288|PREDICTED: ADAMTS-like protein 5 isoform X3 [Gallus gallus]
419017	20.406	64.436	1.66631	0	0	PRSS23	XM_417210.5,XM_001234470.3	XP_001234471.2|2.7e-224|PREDICTED: serine protease 23 [Gallus gallus]
100857105	3.023	9.55	1.66229	2.42821e-87	7.75803e-88	SERPINF2	XM_025142062.1	XP_015151526.1|4.1e-296|PREDICTED: alpha-2-antiplasmin isoform X1 [Gallus gallus]
418616	0.463	1.456	1.6554	9.40897e-79	3.20954e-79	NHS	XM_015272984.2,XM_015272985.2	XP_015741483.1|0.0e+00|PREDICTED: Nance-Horan syndrome protein isoform X2 [Coturnix japonica]
101747453	1.066	3.376	1.6533	1.79434e-68	6.6616e-69	GPRC5B	XM_015294797.2,XM_015294798.1,XM_015294795.1,XM_004945464.3,XM_015294794.1,XM_015294793.2	XP_015150279.1|0.0e+00|PREDICTED: G-protein coupled receptor family C group 5 member B isoform X1 [Gallus gallus]
425531	4.42	14.47	1.65218	5.05897e-161	1.07895e-161	RAB18L	XM_423284.6,BGI_novel_T008923,BGI_novel_T008924,BGI_novel_T008928,BGI_novel_T008927,BGI_novel_T008925,BGI_novel_T008926	XP_423284.2|8.1e-110|PREDICTED: ras-related protein Rab-18-B-like [Gallus gallus]
431640	0.036	0.113	1.64754	1.11356e-07	1.40945e-07	NPR1	XM_025145121.1	XP_015705380.1|0.0e+00|PREDICTED: atrial natriuretic peptide receptor 1-like [Coturnix japonica]
421369	17.196	53.716	1.64612	0	0	ATF3	XM_015283877.2,XM_025149332.1,XM_025149331.1,XM_015283879.1,BGI_novel_T002107,XM_015283878.2,BGI_novel_T002106,XM_015283874.2,XM_025149330.1	XP_003203904.1|4.1e-95|PREDICTED: cyclic AMP-dependent transcription factor ATF-3 [Meleagris gallopavo]
395852	1.03	3.193	1.64464	5.44644e-16	4.83089e-16	ID2	NM_205002.1	NP_990333.1|2.6e-68|DNA-binding protein inhibitor ID-2 [Gallus gallus]
428231	0.743	2.316	1.6441	2.44257e-20	1.90604e-20	MYCL	XM_425790.6	XP_425790.2|1.8e-202|PREDICTED: protein L-Myc [Gallus gallus]
772291	0.183	0.58	1.64233	5.45496e-06	7.65624e-06	SRD5A2	XM_001235446.4	XP_001235447.1|2.8e-152|PREDICTED: 3-oxo-5-alpha-steroid 4-dehydrogenase 2 [Gallus gallus]
420732	4.456	13.89	1.642	1.92656e-160	4.1289e-161	SFRP4	XM_015281688.2,XM_015281689.2	XP_015137175.1|1.4e-224|PREDICTED: secreted frizzled-related protein 4 isoform X2 [Gallus gallus]
421998	0.156	0.526	1.64073	7.22407e-10	8.14806e-10	PTK2B	XM_004935841.3,XM_015285224.2,XM_025149124.1,XM_015285220.2,XM_015285221.2,XM_003641070.4,XM_015285223.2,XM_015285226.2,XM_015285225.2,XM_015285222.2	XP_021246291.1|0.0e+00|protein-tyrosine kinase 2-beta isoform X1 [Numida meleagris]
100858060	32.56	99.66	1.63586	0	0	CLCF1	XM_025151324.1,XM_015272640.2,XM_015272641.2	XP_015128127.1|6.2e-151|PREDICTED: cardiotrophin-like cytokine factor 1 isoform X2 [Gallus gallus]
418178	31.27	96.263	1.63392	0	0	MGST1	XM_025148905.1,XM_015290135.2,XM_015290146.2,XM_025148906.1,XM_025148902.1,XM_025148908.1,NM_001135550.1,XM_025148903.1	XP_015145621.1|1.6e-80|PREDICTED: microsomal glutathione S-transferase 1 isoform X1 [Gallus gallus]
421634	0.093	0.283	1.63278	3.37191e-11	3.5796e-11	AKAP12	XM_004935623.3,XM_025149031.1,XM_004935624.3,XM_004935622.2	XP_004935679.1|0.0e+00|PREDICTED: A-kinase anchor protein 12 isoform X2 [Gallus gallus]
420606	0.813	2.536	1.63259	5.26126e-49	2.47276e-49	ABCB5	XM_418707.6,XM_015281859.2,BGI_novel_T001344,XM_015281858.2,XM_025147417.1,XM_025147418.1	XP_418707.5|0.0e+00|PREDICTED: ATP-binding cassette sub-family B member 5 [Gallus gallus]
769163	3.9	11.936	1.62777	4.22149e-154	9.3105e-155	FILIP1L	XM_004938245.3,XM_025143870.1,BGI_novel_T000587,XM_025143882.1,XM_015296824.1,XM_004938244.3,XM_003640468.4,XM_004938243.3,XM_025143898.1	XP_004938300.1|0.0e+00|PREDICTED: filamin A-interacting protein 1-like isoform X1 [Gallus gallus]
395470	7.226	22.246	1.62587	0	0	ITGB8	XM_015281860.2,XM_025147416.1,XM_003640686.4,XM_025147414.1,XM_015281861.2,BGI_novel_T001343,XM_025147415.1,XM_015281863.2	XP_015137349.1|0.0e+00|PREDICTED: integrin beta-8 isoform X4 [Gallus gallus]
431645	0.156	0.49	1.62386	9.03349e-12	9.3439e-12	MOB3B	XM_025144887.1,XM_025144885.1,XM_025144873.1,XM_025144880.1,XM_025144884.1,XM_025144881.1,XM_004949585.3,XM_025144871.1,XM_025144882.1,XM_025144877.1,XM_025144872.1,XM_025144883.1,XM_004949588.3,XM_025144878.1,XM_015280718.2,XM_004949591.3,XM_025144879.1,XM_025144874.1,XM_004949590.3,XM_025144876.1,XM_025144875.1	XP_004949642.1|8.3e-140|PREDICTED: MOB kinase activator 3B isoform X1 [Gallus gallus]
429762	4.26	12.863	1.62163	4.72501e-38	2.61262e-38	NAT8	XM_015301333.1,BGI_novel_T003241,XM_015301332.2,XM_015301331.2,BGI_novel_T003240	XP_015156817.1|3.8e-117|PREDICTED: putative N-acetyltransferase 8B [Gallus gallus]
100858223	5.443	16.306	1.62039	2.43723e-48	1.15967e-48	THEM4	XM_015280017.2,XM_015280018.2	XP_015135504.1|2.5e-106|PREDICTED: acyl-coenzyme A thioesterase THEM4 isoform X2 [Gallus gallus]
107054985	0.046	0.146	1.62039	0.000623371	0.00104506	ADD2	XM_015297487.2	XP_015152973.1|0.0e+00|PREDICTED: beta-adducin [Gallus gallus]
416246	0.616	1.916	1.61721	3.21451e-56	1.37583e-56	CYFIP2	XM_025154983.1,XM_025154979.1,XM_414567.6,XM_025154985.1,XM_025154982.1,XM_025154981.1,XM_025154980.1,XM_025154984.1	XP_021144642.1|0.0e+00|cytoplasmic FMR1-interacting protein 2 isoform X2 [Columba livia]
415521	2.026	6.263	1.61622	6.17185e-269	8.80099e-270	CHSY1	XM_015292258.2	XP_015147744.1|0.0e+00|PREDICTED: chondroitin sulfate synthase 1 [Gallus gallus]
776037	0.36	1.083	1.61272	1.17583e-07	1.49022e-07	EVI2A	NM_001080893.1	NP_001074362.1|2.5e-145|protein EVI2A precursor [Gallus gallus]
427113	0.116	0.353	1.61041	2.11433e-07	2.71395e-07	MCTP1	XM_004949394.3,XM_015280543.2,XM_004949389.3,XM_025145171.1,XM_025145168.1,XM_025145169.1,XM_025145166.1,XM_025145170.1,XM_025145167.1	XP_004949449.1|0.0e+00|PREDICTED: multiple C2 and transmembrane domain-containing protein 1 isoform X4 [Gallus gallus]
427583	37.523	114.906	1.60968	0	0	FBLN2	XM_015293441.2,XM_015293442.2,XM_015293445.2,XM_015293447.2,XM_015293440.2,XM_015293443.2,XM_015293444.2	XP_015148926.1|0.0e+00|PREDICTED: fibulin-2 [Gallus gallus]
423695	1.466	4.403	1.6079	5.44003e-09	6.388e-09	SRGN	XM_421576.6	XP_421576.1|3.7e-75|PREDICTED: serglycin [Gallus gallus]
428328	0.243	0.74	1.60234	5.52481e-30	3.48552e-30	ATP8B3	XM_025144339.1,XM_025144340.1,XM_025144335.1,BGI_novel_T009072,XM_025144337.1,BGI_novel_T009070,BGI_novel_T009069,XM_025144334.1,XM_025144338.1,XM_025144336.1,XM_015299876.2,BGI_novel_T009073,BGI_novel_T009071	XP_015155362.1|0.0e+00|PREDICTED: phospholipid-transporting ATPase IK isoform X1 [Gallus gallus]
418167	5.3	16.013	1.60077	3.02742e-159	6.53224e-160	USP18	XM_416398.5,XM_004937958.3	XP_004938015.1|2.6e-254|PREDICTED: ubl carboxyl-terminal hydrolase 18 isoform X1 [Gallus gallus]
101748931	30.953	93.136	1.59672	0	0	GDF15	BGI_novel_T009153,XM_025144363.1	XP_015155568.1|2.9e-226|PREDICTED: growth/differentiation factor 15 [Gallus gallus]
415986	9.993	30.013	1.5907	0	0	NINJ1	NM_001277877.1	NP_001264806.1|1.7e-76|ninjurin-1 [Gallus gallus]
419170	0.736	2.24	1.59069	2.43765e-43	1.24601e-43	PPP1R16B	XM_015296355.2,NM_001030851.1,XM_015296357.2	XP_021272131.1|0.0e+00|protein phosphatase 1 regulatory inhibitor subunit 16B isoform X1 [Numida meleagris]
418863	14.473	43.55	1.58737	0	0	FNDC3A	XM_015275595.2,XM_025150385.1,XM_015275611.2,NM_001012826.2,XM_015275605.2,XM_015275608.2,BGI_novel_T000972	Q5ZJP5.2|0.0e+00|RecName: Full=Fibronectin type-III domain-containing protein 3a
107049625	2.056	6.166	1.58606	7.06721e-74	2.50328e-74	LGI3	XM_025142872.1,BGI_novel_T008128	XP_011573465.1|1.4e-265|PREDICTED: leucine-rich repeat LGI family member 3 [Aquila chrysaetos canadensis]
112532338	0.136	0.476	1.58513	8.10302e-07	1.07935e-06	LOC112532338	XM_025150146.1,XM_025150147.1,BGI_novel_T002598	XP_021261797.1|3.4e-150|atherin-like isoform X2 [Numida meleagris]
395560	17.446	52.376	1.58349	0	0	NRP1	NM_204782.1,BGI_novel_T001267,BGI_novel_T001266,XM_015281290.2	XP_015136776.1|0.0e+00|PREDICTED: neuropilin-1 isoform X1 [Gallus gallus]
419849	0.236	0.703	1.58314	1.0398e-06	1.39326e-06	C26H1orf116	XM_015299056.2,XM_015299054.2,XM_417978.6	XP_417978.3|8.5e-290|PREDICTED: specifically androgen-regulated gene protein isoform X1 [Gallus gallus]
423760	0.816	2.453	1.582	6.40262e-26	4.38136e-26	PSD	XM_015288463.2,XM_015288464.2,XM_421634.6,BGI_novel_T004094	XP_421634.4|0.0e+00|PREDICTED: PH and SEC7 domain-containing protein 1 isoform X2 [Gallus gallus]
422138	0.106	0.313	1.5791	0.00052816	0.000879077	SASH3	NM_001031110.1	XP_015715542.1|4.7e-222|PREDICTED: SAM and SH3 domain-containing protein 3 isoform X1 [Coturnix japonica]
772006	0.02	0.056	1.5791	0.00052816	0.000879077	FOXE3	XM_004936919.3	XP_004936976.2|2.4e-224|PREDICTED: forkhead box protein E3 [Gallus gallus]
424312	17.77	52.823	1.5764	0	0	RND3	XM_422158.6	XP_002198752.1|1.8e-136|PREDICTED: rho-related GTP-binding protein RhoE [Taeniopygia guttata]
101748258	1.82	5.4	1.57552	9.69244e-33	5.78037e-33	HPDL	XM_015291281.2	XP_015146767.1|9.2e-226|PREDICTED: 4-hydroxyphenylpyruvate dioxygenase-like protein [Gallus gallus]
100859599	1.156	3.41	1.57372	6.0277e-13	5.95666e-13	RHOG	XM_015280950.2	XP_003213913.2|1.4e-107|PREDICTED: rho-related GTP-binding protein RhoG [Meleagris gallopavo]
396126	0.96	2.65	1.57364	2.05466e-53	9.08875e-54	INHBB	XM_015289788.2,NM_205206.1,XM_025152149.1	XP_015145274.1|2.5e-231|PREDICTED: inhibin beta B chain isoform X1 [Gallus gallus]
107049248	4.49	13.376	1.56977	5.34968e-149	1.20545e-149	INPP1	XM_015272579.2,XM_015272578.2,XM_015272577.2	XP_015128063.1|3.0e-217|PREDICTED: inositol polyphosphate 1-phosphatase [Gallus gallus]
395820	0.446	1.323	1.56694	2.52049e-17	2.14184e-17	DLL1	XM_025148541.1,NM_204973.2,XM_025148540.1,XM_025148539.1	NP_990304.2|0.0e+00|delta-like protein 1 precursor [Gallus gallus]
BGI_novel_G000131	1.503	4.45	1.56363	6.2278e-47	3.0306e-47	BGI_novel_G000131	BGI_novel_T005421
420996	0.35	0.993	1.56078	3.37381e-21	2.57312e-21	NR4A3	XM_015282405.2,XM_015282406.2,XM_015282407.2,XM_419081.6	OPJ68449.1|0.0e+00|nuclear receptor subfamily 4 group A member 3 [Patagioenas fasciata monilis]
769118	29.1	85.34	1.55467	0	0	GABARAPL1	XM_001231887.5	BAE39576.1|4.5e-62|unnamed protein product [Mus musculus]
395925	2.8	7.98	1.55076	1.66459e-55	7.18681e-56	KCNJ5	XM_015298110.2,XM_004947965.3,XM_417864.5,BGI_novel_T008434,XM_025143341.1	XP_417864.2|4.8e-249|PREDICTED: G protein-activated inward rectifier potassium channel 4 isoform X1 [Gallus gallus]
107055405	0.66	1.92	1.54742	4.73308e-21	3.62456e-21	LOC107055405	XM_025145499.1,XM_015300315.2	XP_015155801.1|4.2e-133|PREDICTED: transmembrane protein 198-like [Gallus gallus]
429033	0.106	0.353	1.54644	7.83925e-12	8.08254e-12	SPEG	XM_015290102.2,XM_015290098.2,XM_015290109.2,XM_015290099.2,XM_015290103.2,XM_015290105.2,XM_015290108.2,XM_015290106.2,XM_015290107.2,XM_015290101.2,XM_015290100.2,XM_003641642.4	XP_003641690.3|0.0e+00|PREDICTED: striated muscle preferentially expressed protein kinase isoform X3 [Gallus gallus]
416041	74.073	216.12	1.53814	0	0	SLC6A6	XM_015293093.2,XM_025154478.1,XM_025154479.1,XM_025154476.1,XM_015293097.2,XM_025154475.1,XM_015293092.2,XM_015293090.2,XM_025154474.1,NM_001030600.3,XM_025154472.1,XM_015293094.2,XM_015293091.2,XM_025154473.1	XP_015730481.1|0.0e+00|PREDICTED: sodium- and chloride-dependent taurine transporter isoform X2 [Coturnix japonica]
414837	103.016	296.12	1.53706	0	0	THBS2	XM_015284051.2,XM_015284053.1,NM_001001755.1	XP_010003635.1|0.0e+00|PREDICTED: thrombospondin-2 [Chaetura pelagica]
421134	3.45	10.173	1.53506	2.05852e-124	5.26324e-125	FAM110B	XM_025147971.1,XM_015282684.2,XM_025147972.1,XM_004939866.3,BGI_novel_T001741,XM_015282680.2,XM_004939868.3,XM_015282683.2,XM_015282681.2,XM_015282682.2,XM_004939867.3,XM_015282686.2	XP_004939923.1|8.0e-208|PREDICTED: protein FAM110B [Gallus gallus]
423952	1.756	5.073	1.53485	1.24488e-49	5.78097e-50	CHST15	XM_421811.6	XP_009932898.1|0.0e+00|PREDICTED: carbohydrate sulfotransferase 15 [Opisthocomus hoazin]
770126	22.566	65.01	1.53317	1.19415e-235	1.90391e-236	LOC770126	XM_015298669.2,XM_015298668.2,XM_004948302.3	XP_004948359.2|1.8e-47|PREDICTED: uncharacterized protein LOC770126 isoform X3 [Gallus gallus]
396488	0.53	1.56	1.53186	4.41195e-10	4.92398e-10	CNTF	XM_015286770.2,NM_205492.1	NP_990823.1|4.3e-102|ciliary neurotrophic factor [Gallus gallus]
424243	4.323	12.486	1.52783	9.18953e-75	3.22829e-75	EAF2	NM_001006525.1,XM_015289822.2	NP_001006525.1|1.3e-137|ELL-associated factor 2 [Gallus gallus]
769832	1.04	2.983	1.52753	1.93831e-42	1.00125e-42	CCDC3	XM_003640333.3	XP_003640381.1|2.7e-159|PREDICTED: coiled-coil domain-containing protein 3 [Gallus gallus]
419690	1.92	5.553	1.52708	7.18742e-219	1.22661e-219	MYOM3	BGI_novel_T008392,XM_025143143.1,BGI_novel_T008393,XM_025143142.1,XM_025143141.1,XM_015297915.2,XM_025143144.1	XP_010721814.1|0.0e+00|PREDICTED: myomesin-3 [Meleagris gallopavo]
770104	0.236	0.673	1.52491	2.95803e-07	3.82644e-07	NLGN3	NM_001173521.1	XP_014818608.1|0.0e+00|PREDICTED: neuroligin-3 isoform X3 [Calidris pugnax]
107055878	0.17	0.49	1.52491	7.72642e-06	1.0968e-05	LOC107055878	XM_025147385.1	XP_015156454.1|5.4e-286|PREDICTED: acid-sensing ion channel 1-like [Gallus gallus]
100858743	1.493	4.246	1.52246	4.9547e-14	4.69753e-14	NXPH4	XM_025145527.1	XP_003643608.3|5.1e-149|PREDICTED: neurexophilin-4-like [Gallus gallus]
112531785	0.09	0.263	1.52044	5.34907e-05	8.09361e-05	LOC112531785	XM_025147694.1	XP_014193578.1|2.6e-10|PREDICTED: ribosome-binding protein 1 isoform X1 [Haplochromis burtoni]
418345	0.42	1.15	1.51984	1.67038e-22	1.23021e-22	UPK1B	XM_015294684.2,XM_015294699.2,BGI_novel_T000547,BGI_novel_T000546,XM_015294692.2	XP_015150170.1|2.4e-154|PREDICTED: uroplakin-1b [Gallus gallus]
770646	4.386	12.556	1.51957	6.39563e-202	1.16992e-202	CREG2	XM_001233981.5	XP_001233982.3|1.2e-158|PREDICTED: protein CREG2 [Gallus gallus]
396451	427.623	1218.42	1.51671	0	0	PTGS2	NM_001167718.1,NM_001167719.1	XP_009820589.1|0.0e+00|PREDICTED: prostaglandin G/H synthase 2 isoform X1 [Gavia stellata]
112531607	0.036	0.116	1.51076	5.8849e-06	8.27192e-06	LOC112531607	XM_025146948.1	XP_020515475.1|1.1e-21|dynein heavy chain-like, partial [Labrus bergylta]
417721	0.116	0.323	1.5106	9.60624e-05	0.000149005	FBXL13	XM_015275766.2,XM_415966.5	XP_415966.4|0.0e+00|PREDICTED: F-box/LRR-repeat protein 13 isoform X1 [Gallus gallus]
429145	15.41	43.686	1.50931	0	0	FAM43A	XM_426700.5	XP_426700.2|1.5e-207|PREDICTED: protein FAM43A [Gallus gallus]
101750739	0.25	0.706	1.50884	2.49595e-05	3.67646e-05	LOC101750739	NM_001318426.1	NP_001305355.1|2.1e-307|poliovirus receptor-related protein 4-like precursor [Gallus gallus]
101748210	1.956	5.516	1.50846	1.05277e-61	4.19298e-62	LOC101748210	XM_004938767.3	XP_004938824.1|6.0e-197|PREDICTED: uncharacterized protein LOC101748210 [Gallus gallus]
100857693	1.073	3.093	1.50754	7.75197e-19	6.32798e-19	PAOX	XM_015278694.2,XM_025152046.1	XP_015134180.1|1.4e-265|PREDICTED: LOW QUALITY PROTEIN: peroxisomal N(1)-acetyl-spermine/spermidine oxidase [Gallus gallus]
769943	0.78	2.2	1.50657	1.69234e-06	2.30175e-06	TTC32	XM_025148990.1,XM_025148989.1,XM_025148988.1	XP_004935842.1|7.7e-71|PREDICTED: tetratricopeptide repeat protein 32 isoform X1 [Gallus gallus]
421993	11.173	30.816	1.50481	0	0	ASXL2	XM_025148791.1,BGI_novel_T002502,XM_025148790.1,XM_025148792.1,NM_001031096.1,XM_015285098.2,XM_015285099.2,XM_015285100.2	XP_015140586.1|0.0e+00|PREDICTED: putative Polycomb group protein ASXL2 isoform X3 [Gallus gallus]
419173	19.893	56.236	1.50416	0	0	MAFB	NM_001030852.1	XP_005235943.1|7.7e-182|PREDICTED: transcription factor MafB [Falco peregrinus]
422849	1.163	3.28	1.50233	1.97792e-13	1.91761e-13	CYTL1	XM_420795.4	XP_420795.1|1.3e-66|PREDICTED: cytokine-like protein 1 [Gallus gallus]
418105	0.08	0.173	1.50074	1.76619e-06	2.40549e-06	SVOPL	XM_416339.6,XM_004937855.3	XP_004937912.1|9.1e-289|PREDICTED: putative transporter SVOPL isoform X1 [Gallus gallus]
428809	0.246	0.74	1.49938	1.45004e-08	1.74221e-08	CYP26B1	XM_015286068.2,XM_015286069.2	XP_015141554.1|1.4e-279|PREDICTED: cytochrome P450 26B1 isoform X1 [Gallus gallus]
770612	0.77	2.156	1.49938	3.03204e-06	4.19193e-06	IFITM3	NM_001350061.1	NP_001336990.1|1.4e-72|interferon-induced transmembrane protein 3 [Gallus gallus]
BGI_novel_G000259	0.476	1.336	1.49938	4.49251e-05	6.74432e-05	BGI_novel_G000259	BGI_novel_T009763
107050884	2.256	6.31	1.49188	3.40518e-38	1.87789e-38	LOC107050884	XM_025152885.1	XP_015130064.1|2.2e-297|PREDICTED: LOW QUALITY PROTEIN: C-Jun-amino-terminal kinase-interacting protein 2-like, partial [Gallus gallus]
419860	347.786	965.476	1.49042	0	0	G0S2	NM_001190924.3	OXB54600.1|3.2e-47|hypothetical protein ASZ78_004040 [Callipepla squamata]
374103	0.203	0.566	1.49033	2.0914e-05	3.06187e-05	ZIC1	NM_204254.1	NP_989585.1|6.8e-271|zinc finger protein ZIC 1 [Gallus gallus]
770691	1.663	4.64	1.48785	2.33902e-22	1.73335e-22	C8G	XM_025141428.1	XP_021269358.1|6.8e-121|complement component C8 gamma chain isoform X2 [Numida meleagris]
424831	0.436	1.193	1.48769	2.48252e-13	2.41352e-13	ITM2C	NM_001277418.2,XM_025153349.1	XP_015726720.1|7.7e-127|PREDICTED: integral membrane protein 2C [Coturnix japonica]
107050595	7.46	20.24	1.48746	5.84754e-16	5.19468e-16	LOC107050595	XM_015274314.2	XP_015129800.1|1.1e-34|PREDICTED: basic proline-rich protein-like [Gallus gallus]
414798	22.233	62.1	1.48745	5.07081e-298	6.67226e-299	CYB5A	NM_001001748.2	NP_001001748.1|1.1e-73|cytochrome b5 [Gallus gallus]
423788	1.76	4.903	1.48507	5.22922e-23	3.81428e-23	CH25H	NM_001277354.1	NP_001264283.1|5.6e-168|cholesterol 25-hydroxylase [Gallus gallus]
100858798	0.613	1.696	1.48123	3.12695e-07	4.05079e-07	NMRK2	XM_015299836.2	XP_015155322.1|8.3e-119|PREDICTED: nicotinamide riboside kinase 2 [Gallus gallus]
417815	0.066	0.26	1.48123	3.12695e-07	4.05079e-07	SLC16A7	XM_015281459.2,XM_015281443.2,NM_001199604.1,XM_025147871.1	NP_001186533.1|1.8e-235|monocarboxylate transporter 2 [Gallus gallus]
422810	121.463	337.99	1.48112	0	0	SOD3	XM_015285700.2,BGI_novel_T003136	XP_021250995.1|1.4e-141|extracellular superoxide dismutase [Cu-Zn] [Numida meleagris]
769237	0.07	0.183	1.48027	3.75852e-05	5.60649e-05	ABI3BP	XM_015296943.2,XM_015297007.1,XM_015297064.2,XM_015296959.2,XM_015296923.2,XM_015296941.2,XM_015297034.1,XM_015296932.2,XM_015297057.2,XM_015296978.2,XM_015297037.2,XM_015296995.2,XM_015297002.2,XM_015297091.2,XM_025144007.1,XM_015297025.2,XM_015296937.2,XM_025143986.1,XM_015297043.2,XM_025143975.1,XM_015297073.2,XM_015296952.2,XM_015297088.2,XM_015297083.2,XM_015297017.1,XM_015296948.2,XM_015296…	XP_015152534.1|0.0e+00|PREDICTED: target of Nesh-SH3 isoform X21 [Gallus gallus]
419748	4.183	11.53	1.47977	5.46192e-259	8.09518e-260	UBASH3B	BGI_novel_T008484,XM_015298175.2	XP_015153661.1|0.0e+00|PREDICTED: ubiquitin-associated and SH3 domain-containing protein B [Gallus gallus]
417644	11.866	32.963	1.47754	3.7359e-304	4.81481e-305	PPM1D	XM_415890.5	XP_415890.4|0.0e+00|PREDICTED: protein phosphatase 1D [Gallus gallus]
421752	8.11	22.79	1.47588	3.80131e-245	5.90264e-246	TRAF3IP2	BGI_novel_T002363,XM_025148965.1,XM_004940302.3,XM_025148964.1,XM_025148963.1,XM_419782.5,BGI_novel_T002364	XP_419782.1|0.0e+00|PREDICTED: adapter protein CIKS isoform X1 [Gallus gallus]
415906	0.313	0.84	1.47338	1.74536e-05	2.54474e-05	PFKFB4	NM_001361249.1,BGI_novel_T010068,BGI_novel_T010069,XM_025146276.1	XP_007422260.1|1.7e-228|PREDICTED: 6-phosphofructo-2-kinase/fructose-2,6-bisphosphatase 1 isoform X4 [Python bivittatus]
424310	0.163	0.436	1.47199	7.43649e-05	0.000113834	LYPD6B	XM_004943028.3,XM_015289874.2,XM_422156.5	XP_021255420.1|2.2e-100|ly6/PLAUR domain-containing protein 6B isoform X3 [Numida meleagris]
419388	0.44	1.24	1.46794	2.74962e-33	1.62324e-33	PRDM16	XM_004947378.3,XM_025142615.1,XM_025142614.1,BGI_novel_T007973,XM_417551.6	XP_417551.3|0.0e+00|PREDICTED: PR domain zinc finger protein 16 isoform X2 [Gallus gallus]
101751402	5.386	14.85	1.46747	9.46792e-89	3.00135e-89	PPP1R3G	XM_004939704.3	XP_004939761.2|1.2e-157|PREDICTED: protein phosphatase 1 regulatory subunit 3G [Gallus gallus]
770620	8.633	23.763	1.46692	1.10997e-169	2.28653e-170	NPDC1	XM_025141402.1,XM_025141404.1,XM_025141403.1	XP_015135073.1|5.8e-175|PREDICTED: neural proliferation differentiation and control protein 1 [Gallus gallus]
107053650	140.84	386.356	1.46477	0	0	DDIT4	XM_015288240.1	XP_015143726.1|3.3e-102|PREDICTED: DNA damage-inducible transcript 4 protein [Gallus gallus]
101747308	0.183	0.51	1.46285	3.13941e-05	4.65101e-05	INA	XM_015288732.2	XP_015144218.1|2.0e-231|PREDICTED: alpha-internexin [Gallus gallus]
770435	3.936	10.803	1.46025	1.87475e-208	3.34756e-209	DUSP8	XM_004941446.3,XM_015286687.2,XM_001232892.4,XM_015286688.2	XP_001232893.1|0.0e+00|PREDICTED: dual specificity protein phosphatase 8 isoform X1 [Gallus gallus]
420190	0.163	0.46	1.45938	2.18277e-07	2.80588e-07	JPH1	XM_015282877.2,XM_015282876.2,XM_015282874.2,XM_015282875.2,XM_025148000.1	XP_015138360.1|0.0e+00|PREDICTED: junctophilin-1 [Gallus gallus]
429941	0.246	0.673	1.45938	2.18277e-07	2.80588e-07	ISLR2	NM_001044667.1	NP_001038132.1|0.0e+00|immunoglobulin superfamily containing leucine-rich repeat protein 2 precursor [Gallus gallus]
417225	0.226	0.676	1.45767	2.6721e-08	3.26549e-08	SH2D3C	XM_015279707.2,BGI_novel_T007108,XM_415508.6,XM_004945815.3	XP_010719140.1|0.0e+00|PREDICTED: SH2 domain-containing protein 3C isoform X2 [Meleagris gallopavo]
421561	1.246	3.41	1.45518	6.59846e-43	3.39065e-43	DACT2	XM_015284364.2	XP_015139850.1|0.0e+00|PREDICTED: dapper homolog 2 [Gallus gallus]
429091	0.213	0.423	1.45288	1.52031e-13	1.46479e-13	MCOLN3	XM_025152977.1,XM_025152975.1,XM_025152976.1,XM_015290867.2,XM_015290866.2	XP_015146352.1|0.0e+00|PREDICTED: mucolipin-3 isoform X1 [Gallus gallus]
428413	8.266	22.146	1.45043	1.11428e-69	4.09283e-70	BAMBI	NM_001195401.2,XM_025147325.1	NP_001182330.1|1.5e-146|BMP and activin membrane-bound inhibitor homolog precursor [Gallus gallus]
417253	0.203	0.613	1.44999	3.16663e-06	4.38393e-06	GSL	XM_015279681.2,XM_015279682.1,BGI_novel_T007089,XM_004945792.2,XM_003642252.4,BGI_novel_T007090	XP_021269727.1|4.4e-230|glutamine synthetase isoform X1 [Numida meleagris]
417619	17.536	47.5	1.4453	0	0	NXN	XM_015296116.2,XM_025141989.1	XP_021093873.1|6.1e-205|nucleoredoxin isoform X1 [Heterocephalus glaber]
419844	0.936	2.52	1.44253	2.24568e-30	1.4079e-30	RASSF5	BGI_novel_T008769,XM_015298927.2,NM_001008452.1,XM_015298925.2,XM_015298926.2	XP_015154412.1|1.5e-204|PREDICTED: ras association domain-containing protein 5 isoform X2 [Gallus gallus]
768509	0.09	0.246	1.44189	0.00021643	0.000347092	EDN3	XM_015296552.1,XM_015296553.1,XM_025142359.1	XP_015152038.1|1.1e-106|PREDICTED: endothelin-3 isoform X1 [Gallus gallus]
395666	39.803	107.843	1.44128	0	0	CD44	XM_015286973.2,BGI_novel_T003518,BGI_novel_T003512,XM_025150581.1,XM_015286974.2,BGI_novel_T003513,XM_015286967.2,XM_015286968.2,BGI_novel_T003519,XM_025150572.1,BGI_novel_T003516,XM_025150577.1,XM_025150574.1,BGI_novel_T003511,BGI_novel_T003517,XM_015286965.2,XM_025150582.1,NM_204860.3,XM_025150571.1,XM_025150578.1,XM_025150576.1,XM_025150580.1,XM_025150583.1,BGI_novel_T003514,BGI_novel_T003515,…	XP_015142451.1|0.0e+00|PREDICTED: CD44 antigen isoform X22 [Gallus gallus]
416689	5.36	15.12	1.44126	0	0	FAM208B	XM_025153130.1,BGI_novel_T000050,BGI_novel_T000051,BGI_novel_T000049,XM_025153139.1,XM_025153141.1,XM_414985.6	XP_414985.4|0.0e+00|PREDICTED: protein FAM208B isoform X1 [Gallus gallus]
416438	0.596	1.606	1.43722	5.47969e-16	4.86381e-16	NPTX2	XM_414750.6	XP_414750.3|4.0e-253|PREDICTED: neuronal pentraxin-2 [Gallus gallus]
373894	0.896	2.393	1.43687	1.35963e-99	4.01329e-100	SDK1	NM_204105.3,BGI_novel_T006431,XM_015294105.2,XM_015294102.2,XM_015294104.2,XM_015294103.2	NP_989436.2|0.0e+00|protein sidekick-1 [Gallus gallus]
419965	0.17	0.456	1.4351	1.54507e-08	1.86088e-08	FMNL1	XM_015299283.2	XP_015154769.1|0.0e+00|PREDICTED: formin-like protein 1 isoform X5 [Gallus gallus]
404304	3.56	9.613	1.43472	2.23553e-170	4.59124e-171	PLA2R1	NM_206983.1	NP_996866.1|0.0e+00|secretory phospholipase A2 receptor precursor [Gallus gallus]
386574	7.996	21.523	1.43288	7.37158e-227	1.2182e-227	NFKB2	NM_204413.1,BGI_novel_T004093,BGI_novel_T004091,BGI_novel_T004092	XP_010712732.2|0.0e+00|PREDICTED: nuclear factor NF-kappa-B p100 subunit isoform X1 [Meleagris gallopavo]
418854	1.15	3.01	1.43193	2.58487e-28	1.67696e-28	RUBCNL	XM_025146804.1,XM_025146803.1	XP_417049.3|0.0e+00|PREDICTED: uncharacterized protein KIAA0226-like homolog isoform X1 [Gallus gallus]
422661	4.806	12.843	1.43068	3.37469e-38	1.86037e-38	SULT1B	NM_001312678.1	NP_001299607.1|8.9e-176|sulfotransferase family, cytosolic, 1B [Gallus gallus]
101749626	2.503	6.74	1.42994	1.9519e-36	1.10524e-36	CWF19L1	XM_004941985.3	XP_004942042.1|0.0e+00|PREDICTED: CWF19-like protein 1 [Gallus gallus]
420611	14.563	39.093	1.42947	0	0	FAM126A	XM_015281437.2,XM_015281438.2,XM_015281439.2,NM_001030983.2,XM_015281434.1,XM_025147193.1,XM_015281431.2,XM_025147194.1,BGI_novel_T001347,XM_015281436.2,XM_015281440.2	XP_015136926.1|3.8e-231|PREDICTED: hyccin isoform X4 [Gallus gallus]
396119	10.726	29.323	1.42889	1.25313e-175	2.5137e-176	FST	NM_205200.1,XM_015277250.2	NP_990531.1|1.0e-196|follistatin precursor [Gallus gallus]
770592	3.123	7.956	1.42829	0.000846449	0.00143928	MT3	NM_001097538.1	NP_001091007.1|3.2e-37|metallothionein-3 [Gallus gallus]
107051871	1.86	4.976	1.42754	4.47388e-70	1.63677e-70	KCTD12	XM_015277167.2	XP_021272874.1|5.1e-183|BTB/POZ domain-containing protein KCTD12 [Numida meleagris]
424803	5.763	15.38	1.4269	0	0	DOCK10	BGI_novel_T005180,XM_015277025.2,BGI_novel_T005179,BGI_novel_T005185,XM_015277023.2,XM_015277026.2,BGI_novel_T005183,XM_015277010.2,XM_015277016.2,XM_015277022.2,XM_015277012.2,XM_015277006.2,BGI_novel_T005181,XM_015277014.2,BGI_novel_T005184,XM_015277020.2,XM_015277007.2,XM_015277009.2,XM_015277024.2,XM_015277013.2,XM_025153516.1,XM_015277021.2,BGI_novel_T005182,XM_015277018.2,XM_015277015.2,XM_…	XP_015132497.1|0.0e+00|PREDICTED: dedicator of cytokinesis protein 10 isoform X5 [Gallus gallus]
428065	0.126	0.313	1.42137	8.35016e-05	0.000128549	PCDH8	NM_001098609.1,XM_015275767.2	XP_015131253.1|0.0e+00|PREDICTED: protocadherin-8 isoform X1 [Gallus gallus]
416281	66.966	177.006	1.41807	0	0	RNF130	XM_015293933.2,XM_414601.6	XP_414601.3|3.2e-265|PREDICTED: E3 ubiquitin-protein ligase RNF130 isoform X3 [Gallus gallus]
427839	1.203	2.583	1.4156	6.81532e-58	2.86315e-58	KSR1	BGI_novel_T007703,BGI_novel_T007701,XM_004946782.3,BGI_novel_T007702,BGI_novel_T007705,BGI_novel_T007700,XM_004946780.3,XM_425413.6,XM_004946781.3,BGI_novel_T007704	XP_004946838.1|0.0e+00|PREDICTED: kinase suppressor of Ras 1 isoform X4 [Gallus gallus]
101750407	0.496	1.296	1.41526	2.70692e-12	2.74479e-12	PLEKHS1	XM_025151840.1,XM_025151839.1,XM_025151838.1,XM_025151841.1,BGI_novel_T004219	XP_015722806.1|3.4e-197|PREDICTED: pleckstrin homology domain-containing family S member 1 isoform X1 [Coturnix japonica]
417257	0.32	0.813	1.41329	1.92577e-08	2.33421e-08	TOR4A	XM_015279674.2,XM_015279671.2,XM_004945789.3,XM_415532.6,XM_015279672.2,XM_015279673.2	XP_415532.3|8.2e-306|PREDICTED: torsin-4A [Gallus gallus]
771930	4.52	11.88	1.40715	4.20798e-55	1.82378e-55	HSD11B1a	XM_015299048.2,XM_001235137.5,XM_025143927.1	XP_001235138.2|4.9e-155|PREDICTED: corticosteroid 11-beta-dehydrogenase isozyme 1 isoform X1 [Gallus gallus]
429200	3.12	8.523	1.40697	4.07537e-69	1.50284e-69	SLC38A3	XM_015293495.2,XM_025154626.1	XP_010716681.2|2.9e-275|PREDICTED: sodium-coupled neutral amino acid transporter 3 isoform X1 [Meleagris gallopavo]
395267	2.356	6.223	1.40491	2.34185e-36	1.32848e-36	FMO3	NM_204579.1	NP_989910.1|0.0e+00|flavin containing monooxygenase 3 [Gallus gallus]
100859891	1.486	4.01	1.39605	6.30864e-29	4.0456e-29	GPR153	XM_015297062.2,XM_015297063.2	XP_015152548.1|0.0e+00|PREDICTED: probable G-protein coupled receptor 153 [Gallus gallus]
422599	4.876	13.826	1.3928	3.29208e-166	6.85694e-167	TMEM150C	XM_015276483.2,XM_015276482.2,XM_025149990.1,XM_025149989.1,BGI_novel_T002919,XM_025149988.1,XM_015276488.2,XM_025149987.1,BGI_novel_T002920,XM_025149991.1,XM_015276485.2,BGI_novel_T002921,BGI_novel_T002922,XM_015276481.2	XP_021252820.1|3.1e-166|transmembrane protein 150C isoform X1 [Numida meleagris]
417963	4.31	11.313	1.39246	1.07007e-138	2.52465e-139	FAM234B	NM_001012812.1,BGI_novel_T000250	NP_001012830.1|0.0e+00|protein FAM234B [Gallus gallus]
427549	0.87	2.266	1.391	1.06839e-07	1.35095e-07	CEBPA	NM_001031459.1	NP_001026630.1|1.3e-190|CCAAT/enhancer-binding protein alpha [Gallus gallus]
BGI_novel_G000039	0.326	0.86	1.38997	8.50995e-16	7.59947e-16	BGI_novel_G000039	BGI_novel_T001074
424366	77.983	204.006	1.38984	0	0	OLFML2B	XM_422209.6	XP_422209.5|0.0e+00|PREDICTED: olfactomedin-like protein 2B [Gallus gallus]
770775	0.266	0.74	1.38919	4.87165e-07	6.40513e-07	IRX5	XM_025154323.1,XM_015292371.2	OXB76117.1|1.8e-278|hypothetical protein H355_000216 [Colinus virginianus]
426894	1.733	4.523	1.38633	8.27146e-34	4.84352e-34	AQP3	XM_424500.6	XP_424500.3|1.7e-167|PREDICTED: aquaporin-3 [Gallus gallus]
112533475	1.58	4.1	1.385	5.14944e-21	3.95197e-21	LOC112533475	XM_025155390.1	XP_015149621.1|1.7e-168|PREDICTED: deoxyribonuclease-1 isoform X1 [Gallus gallus]
396330	2.946	7.643	1.3847	4.10289e-46	2.01106e-46	IRF7	NM_205372.1	NP_990703.1|8.0e-293|interferon regulatory factor 3 [Gallus gallus]
422445	2.003	5.276	1.38199	1.62521e-98	4.82764e-99	MAML3	XM_015276690.2,BGI_novel_T002786,XM_015276692.2,XM_015276691.2	XP_015132176.1|0.0e+00|PREDICTED: mastermind-like protein 3 isoform X1 [Gallus gallus]
415470	0.806	1.926	1.38042	2.153e-32	1.29385e-32	TMC3	BGI_novel_T005542,BGI_novel_T005540,BGI_novel_T005541,XM_025153837.1,NM_001005820.1	NP_001005820.1|0.0e+00|transmembrane channel-like protein 3 [Gallus gallus]
776013	4.173	10.86	1.37845	2.32144e-211	4.0921e-212	PELI2	XM_025151069.1,XM_001234987.5	XP_001234988.1|4.3e-255|PREDICTED: E3 ubiquitin-protein ligase pellino homolog 2 [Gallus gallus]
418004	19.753	50.883	1.37006	2.57312e-216	4.45015e-217	SLC25A17	XM_416242.6	XP_416242.1|7.1e-185|PREDICTED: peroxisomal membrane protein PMP34 [Gallus gallus]
418005	17.253	44.956	1.36851	0	0	MKL1	XM_416243.6,XM_004937714.2,XM_025155225.1,XM_004937713.3	XP_004937770.1|0.0e+00|PREDICTED: MKL/myocardin-like protein 1 isoform X1 [Gallus gallus]
396399	51.803	131.803	1.36382	0	0	TGFBR2	XM_015281322.2,XM_015281321.2,BGI_novel_T001382,NM_205428.1	NP_990759.1|0.0e+00|TGF-beta receptor type-2 precursor [Gallus gallus]
418185	3.166	8.11	1.36304	2.2119e-257	3.30127e-258	PDE3A	XM_025141952.1,XM_025141954.1,XM_025141947.1,XM_015291850.2,XM_015291846.2	XP_015147332.1|0.0e+00|PREDICTED: cGMP-inhibited 3',5'-cyclic phosphodiesterase A isoform X1 [Gallus gallus]
100859840	28.873	73.696	1.36274	3.02724e-241	4.75101e-242	CYBA	XM_015292663.2	XP_015148149.1|3.0e-101|PREDICTED: cytochrome b-245 light chain [Gallus gallus]
396500	19.753	50.616	1.3608	0	0	REL	XM_015283288.2,NM_001167726.1	NP_001161198.1|0.0e+00|proto-oncogene c-Rel [Gallus gallus]
395328	0.286	0.71	1.35997	0.000181621	0.000288927	HOXD11	XM_015289379.2,NM_204620.1	NP_989951.1|1.2e-164|homeobox protein Hox-D11 [Gallus gallus]
107055390	1.54	3.933	1.35971	4.26464e-21	3.26317e-21	LOC107055390	XM_015300220.2	XP_015155706.1|3.8e-161|PREDICTED: tristetraprolin-like [Gallus gallus]
419155	2.1	5.46	1.35404	8.59712e-42	4.48915e-42	CBFA2T2	BGI_novel_T007772,NM_001011689.1	NP_001011689.1|0.0e+00|protein CBFA2T2 [Gallus gallus]
417561	144.876	367.213	1.35294	0	0	SERPINF1	XM_025141957.1,NM_001257289.1,XM_015295746.2	NP_001244218.1|3.1e-232|pigment epithelium-derived factor precursor [Gallus gallus]
769420	0.616	2.31	1.35232	3.18979e-41	1.67954e-41	PRKAR2B	XM_015275787.2,XM_015275788.2	XP_015131274.1|9.9e-200|PREDICTED: cAMP-dependent protein kinase type II-beta regulatory subunit isoform X2 [Gallus gallus]
415732	0.323	0.826	1.3498	2.77495e-16	2.43711e-16	ADCY7	XM_015292403.2,XM_015292402.2,BGI_novel_T005722,BGI_novel_T005719,BGI_novel_T005718,BGI_novel_T005720,XM_015292405.2,BGI_novel_T005721,XM_015292406.2,XM_015292407.2,XM_015292404.2,XM_025154320.1,XM_025154319.1,XM_015292401.2	XP_015147887.1|0.0e+00|PREDICTED: adenylate cyclase type 7 isoform X1 [Gallus gallus]
395752	4.513	11.436	1.34866	1.56407e-56	6.65527e-57	NKX6-1	XM_025150295.1	XP_015716953.1|5.3e-176|PREDICTED: LOW QUALITY PROTEIN: homeobox protein Nkx-6.1 [Coturnix japonica]
100858414	21.39	54.076	1.34724	6.01224e-260	8.89832e-261	SPOCK2	XM_015288242.2,XM_015288241.2	XP_015143727.1|3.5e-252|PREDICTED: testican-2 isoform X1 [Gallus gallus]
421541	0.386	0.986	1.34457	4.47695e-33	2.656e-33	PGBD5	XM_015284385.2	XP_015139871.1|0.0e+00|PREDICTED: piggyBac transposable element-derived protein 5 [Gallus gallus]
396529	0.346	0.883	1.34373	1.84472e-06	2.51321e-06	ATP1B1	NM_205520.4	NP_990851.1|1.3e-181|sodium/potassium-transporting ATPase subunit beta-1 [Gallus gallus]
395669	2.186	5.533	1.34214	8.44275e-42	4.4068e-42	PLEK	NM_204863.1,BGI_novel_T002019	NP_990194.1|9.2e-205|pleckstrin [Gallus gallus]
100858042	0.84	2.12	1.34074	1.48204e-10	1.62538e-10	YPEL4	XM_003641331.4	XP_003641379.2|1.2e-91|PREDICTED: protein yippee-like 4 [Gallus gallus]
776038	0.256	0.623	1.3396	1.18766e-10	1.29735e-10	SGIP1	XM_015291103.2,XM_015291099.1,XM_015291100.2,XM_015291102.2,XM_015291104.2,XM_015291112.2,XM_015291107.2,XM_015291106.2,XM_025153145.1,XM_015291111.2,XM_015291108.2,XM_015291098.2,XM_015291105.2,XM_015291110.2	XP_015146596.1|0.0e+00|PREDICTED: SH3-containing GRB2-like protein 3-interacting protein 1 isoform X10 [Gallus gallus]
107050634	3.816	9.456	1.33673	1.81109e-11	1.89948e-11	CACNG7	XM_025145521.1	XP_015129833.1|5.3e-70|PREDICTED: voltage-dependent calcium channel gamma-7 subunit [Gallus gallus]
396348	1.596	3.913	1.32394	4.67703e-05	7.03616e-05	BGLAP	NM_205387.2	NP_990718.2|1.5e-47|osteocalcin preproprotein [Gallus gallus]
420094	0.783	1.953	1.32381	4.90373e-32	2.9622e-32	ATCAY	BGI_novel_T009052,XM_015299835.2,XM_015299834.2,XM_004948741.3	XP_004948798.2|2.2e-209|PREDICTED: caytaxin isoform X2 [Gallus gallus]
770109	28.636	71.816	1.32344	2.58433e-263	3.77117e-264	CTSH	BGI_novel_T005627,NM_001318407.1	XP_021262917.1|3.9e-193|pro-cathepsin H [Numida meleagris]
107052956	0.9	2.246	1.31765	9.55706e-15	8.83056e-15	HLX	XM_015283902.2,XM_015283901.2	XP_015139387.1|9.8e-252|PREDICTED: H2.0-like homeobox protein isoform X1 [Gallus gallus]
101747811	0.896	2.216	1.317	3.30442e-07	4.28688e-07	APLN	XM_015278386.2	XP_015715548.1|1.3e-70|PREDICTED: apelin [Coturnix japonica]
107055369	0.166	0.413	1.31566	8.35745e-05	0.000128695	LRRC25	XM_015300147.2	XP_021234558.1|5.2e-88|leucine-rich repeat-containing protein 25 isoform X1 [Numida meleagris]
416086	0.033	0.073	1.31508	0.000832383	0.00141381	MCT2L	XM_025154567.1,XM_015293262.2,XM_025154569.1,BGI_novel_T006109,XM_015293261.2,XM_015293260.2,XM_414421.5,XM_015293259.2,XM_025154570.1	XP_414421.2|4.2e-253|PREDICTED: monocarboxylate transporter 2-like isoform X2 [Gallus gallus]
395386	2.153	5.336	1.31382	1.10581e-33	6.49598e-34	CLEC3B	NM_204666.1	NP_989997.1|3.1e-112|tetranectin precursor [Gallus gallus]
429683	2.536	6.283	1.31321	3.32826e-102	9.65816e-103	SMAD7	XM_004949014.3,BGI_novel_T009283,XM_427238.6	XP_427238.2|1.5e-235|PREDICTED: mothers against decapentaplegic homolog 7 isoform X1 [Gallus gallus]
426324	1.233	3.093	1.31034	1.54142e-48	7.29584e-49	MCTP2	XM_004943864.3,XM_004943863.3,XM_015292280.2,BGI_novel_T005564,XM_003641820.4	XP_004943920.2|0.0e+00|PREDICTED: multiple C2 and transmembrane domain-containing protein 2 isoform X1 [Gallus gallus]
374148	0.833	2.06	1.3099	1.39787e-10	1.53133e-10	SOX9	NM_204281.1	NP_001310162.1|1.3e-296|transcription factor SOX-9 [Coturnix japonica]
416477	0.936	2.276	1.3089	1.13726e-14	1.05318e-14	CYP3A4	XM_015294357.2,NM_001329508.1	XP_015732450.1|2.0e-283|PREDICTED: cytochrome P450 3A12-like [Coturnix japonica]
112529985	0.09	0.223	1.30673	2.63387e-05	3.88837e-05	LOC112529985	XM_025141429.1
419060	0.56	1.363	1.30673	1.01085e-05	1.44735e-05	DNAJB13	BGI_novel_T001115,XM_025152503.1,BGI_novel_T001114,XM_417251.6,XM_025152496.1,XM_025152495.1	XP_417251.3|5.2e-116|PREDICTED: dnaJ homolog subfamily B member 13 [Gallus gallus]
420262	50.353	124.203	1.30495	0	0	CTHRC1	XM_418373.6	KFV97027.1|2.5e-10|Collagen alpha-1(II) chain, partial [Eurypyga helias]
769506	3.206	7.9	1.30031	0	0	DGKH	XM_001232790.4,BGI_novel_T000957,XM_004938670.3,XM_004938671.3,BGI_novel_T000958,XM_004938672.2	XP_004938727.1|0.0e+00|PREDICTED: diacylglycerol kinase eta isoform X1 [Gallus gallus]
395480	0.673	1.763	1.29982	3.36654e-07	4.36958e-07	RGN	XM_015277687.2,XM_025155401.1,NM_204729.1,XM_015277686.2,XM_025155382.1	XP_015133172.1|6.2e-173|PREDICTED: regucalcin isoform X1 [Gallus gallus]
396002	6.393	15.553	1.29954	1.43737e-32	8.61101e-33	AK1	XM_025156030.1,BGI_novel_T007103,XM_025156031.1,XM_015279336.1,NM_205109.2	XP_015134822.1|1.2e-111|PREDICTED: adenylate kinase isoenzyme 1 isoform X1 [Gallus gallus]
417892	1362.09	3415.19	1.29781	0	0	DCN	BGI_novel_T000216,NM_001030747.2	NP_001025918.1|9.6e-204|decorin precursor [Gallus gallus]
417617	4.143	10.133	1.29757	4.60848e-65	1.77415e-65	SLC47A1	XM_015295777.2,NM_001030720.3	XP_015151263.1|2.0e-280|PREDICTED: multidrug and toxin extrusion protein 1 isoform X1 [Gallus gallus]
421726	16.703	40.993	1.29744	0	0	MAN1A1	XM_419762.6	XP_419762.5|0.0e+00|PREDICTED: mannosyl-oligosaccharide 1,2-alpha-mannosidase IA [Gallus gallus]
107050975	4.793	11.696	1.29719	9.34e-28	6.13516e-28	LOC107050975	XM_025145719.1	XP_005533669.1|3.9e-101|PREDICTED: LOW QUALITY PROTEIN: voltage-dependent P/Q-type calcium channel subunit alpha-1A [Pseudopodoces humilis]
374012	13.73	33.66	1.29686	0	0	BIRC2	NM_001007822.1	NP_001007823.1|0.0e+00|inhibitor of apoptosis protein [Gallus gallus]
423867	18.416	45.14	1.29652	0	0	WBP1L	XM_015288740.1,BGI_novel_T004194,XM_015288742.2,BGI_novel_T004193,XM_025151875.1,XM_025151878.1,XM_015288736.2,XM_025151877.1,XM_004942244.3,XM_025151876.1,XM_421732.6	XP_421732.1|4.6e-209|PREDICTED: WW domain binding protein 1-like isoform X4 [Gallus gallus]
418647	0.583	1.413	1.29584	0.000386702	0.000635675	TMEM243	XM_015299511.2	XP_015154997.1|6.6e-62|PREDICTED: transmembrane protein 243 [Gallus gallus]
107050411	10.673	26.093	1.29562	1.09833e-254	1.64612e-255	LOC107050411	XM_025142856.1	XP_014118028.1|1.7e-288|PREDICTED: ras-interacting protein 1 [Pseudopodoces humilis]
426086	9.906	24.123	1.29187	3.55306e-90	1.11377e-90	LPAR2	NM_001115081.2	NP_001108553.2|1.7e-207|lysophosphatidic acid receptor 2 [Gallus gallus]
395083	1.166	2.88	1.291	2.78157e-31	1.70513e-31	TNFRSF1B	NM_204439.3,XM_015296812.2	XP_015152298.1|2.6e-272|PREDICTED: tumor necrosis factor receptor superfamily member 1B isoform X1 [Gallus gallus]
417690	19.31	46.813	1.28812	0	0	CPNE8	XM_025147249.1,NM_001199460.1	NP_001186389.1|0.0e+00|copine-8 [Gallus gallus]
419386	0.58	1.416	1.28809	2.2165e-13	2.15259e-13	ARHGEF16	XM_004947372.3,XM_004947371.3,XM_025142619.1,XM_417549.6	XP_417549.5|0.0e+00|PREDICTED: rho guanine nucleotide exchange factor 16 isoform X1 [Gallus gallus]
100858681	0.983	2.366	1.28587	2.38994e-06	3.27837e-06	HIST1H3H	NM_001281509.2	XP_008959404.1|2.5e-70|PREDICTED: hereditary hemochromatosis protein [Pan paniscus]
427638	232.72	562.996	1.28514	0	0	GPX3	NM_001163232.2	NP_001156704.1|9.8e-125|glutathione peroxidase 3 precursor [Gallus gallus]
395391	7.44	17.996	1.28322	4.93262e-58	2.06914e-58	SNCB	NM_204671.1,XM_015293731.2	NP_990002.1|4.9e-65|beta-synuclein [Gallus gallus]
417550	2.156	5.233	1.28291	4.35563e-47	2.11684e-47	LRRC75A	XM_015296029.2,XM_015296030.2,XM_415798.5	XP_415798.2|5.5e-205|PREDICTED: leucine-rich repeat-containing protein 75A isoform X1 [Gallus gallus]
100858920	1.606	3.88	1.28275	7.91283e-12	8.16006e-12	SYPL2	XM_015298773.2	XP_015154259.1|2.2e-148|PREDICTED: synaptophysin-like protein 2 isoform X1 [Gallus gallus]
424919	2.906	7.01	1.2736	8.30942e-66	3.17992e-66	LOC424919	XM_422729.6,BGI_novel_T005268,BGI_novel_T005269	XP_021250745.1|2.2e-309|deoxyribodipyrimidine photo-lyase-like [Numida meleagris]
421423	0.383	0.923	1.27337	2.9027e-11	3.07062e-11	KCNK17	XM_419477.4	XP_419477.3|2.7e-183|PREDICTED: potassium channel subfamily K member 17 [Gallus gallus]
427309	0.733	1.75	1.27306	3.01544e-22	2.23963e-22	TMEM246	XM_004949500.3,XM_004949499.3	XP_004949556.1|2.2e-234|PREDICTED: transmembrane protein 246 [Gallus gallus]
BGI_novel_G000185	1.296	3.056	1.27197	0.000685487	0.00115376	BGI_novel_G000185	BGI_novel_T007444
768642	0.453	1.33	1.26969	2.02043e-17	1.71271e-17	CCDC113	BGI_novel_T005650,XM_025154243.1,BGI_novel_T005652,XM_025154242.1,XM_025154244.1,XM_025154241.1,BGI_novel_T005651,XM_025154240.1	XP_015147795.1|3.4e-172|PREDICTED: coiled-coil domain-containing protein 113 [Gallus gallus]
769343	0.22	0.356	1.26654	6.68316e-05	0.000101997	AP3B2	XM_025153930.1,XM_025153932.1,XM_025153931.1,XM_025153928.1,XM_025153929.1,XM_025153926.1,XM_025153927.1	XP_009896742.1|0.0e+00|PREDICTED: AP-3 complex subunit beta-2 [Picoides pubescens]
425372	0.57	1.373	1.26491	2.15561e-39	1.16368e-39	FREM3	XM_003642983.4	XP_003643031.2|0.0e+00|PREDICTED: chondroitin sulfate proteoglycan 4-like [Gallus gallus]
374001	0.303	0.73	1.26188	6.64247e-07	8.80656e-07	CHRNA7	NM_204181.2	NP_989512.2|1.1e-300|neuronal acetylcholine receptor subunit alpha-7 precursor [Gallus gallus]
422194	10.24	24.266	1.26012	6.86278e-46	3.37383e-46	TMEM35A	XM_003643318.4	XP_003643366.1|1.4e-86|PREDICTED: transmembrane protein 35 [Gallus gallus]
373908	73.243	174.713	1.25651	0	0	EDNRA	NM_204119.1	NP_989450.1|3.8e-246|endothelin-1 receptor precursor [Gallus gallus]
771559	0.37	0.87	1.25426	4.63778e-09	5.43438e-09	SCARF1	XM_015296038.2,XM_015296037.2	XP_010720028.1|0.0e+00|PREDICTED: scavenger receptor class F member 1 [Meleagris gallopavo]
100859020	1.64	3.853	1.25221	6.00686e-40	3.21277e-40	LOC100859020	XM_015290036.2,XM_004942903.3,XM_015290034.2,BGI_novel_T004572,BGI_novel_T004571,XM_015290037.2,BGI_novel_T004570	XP_015145520.1|2.6e-279|PREDICTED: leucine-zipper-like transcriptional regulator 1 isoform X1 [Gallus gallus]
425989	0.2	0.493	1.2494	1.15886e-05	1.66481e-05	PRMT8	XM_025142595.1,XM_025142602.1,XM_025142609.1,XM_004938079.3,XM_004938080.3,XM_423669.6,XM_015292530.2	XP_015476907.1|1.4e-220|PREDICTED: protein arginine N-methyltransferase 8 isoform X1 [Parus major]
769087	48.866	115.586	1.24777	0	0	ANGPTL4	XM_001232283.5	XP_001232284.3|6.6e-280|PREDICTED: angiopoietin-related protein 4 [Gallus gallus]
768450	0.14	0.316	1.24661	0.000374139	0.000613857	FAM131B	XM_025143097.1,XM_015293980.2,XM_015293940.2,BGI_novel_T000511,XM_015294002.2,XM_015293959.2,BGI_novel_T000515,BGI_novel_T000513,BGI_novel_T000517,XM_015293946.2,BGI_novel_T000510,XM_015293969.2,XM_025143088.1,XM_015293976.2,XM_015293948.2,XM_015294008.2,XM_025143102.1,BGI_novel_T000518,BGI_novel_T000514,XM_015293985.2,BGI_novel_T000512,XM_015293965.2,BGI_novel_T000516	XP_015149451.1|2.2e-224|PREDICTED: protein FAM131B isoform X5 [Gallus gallus]
BGI_novel_G000009	0.483	1.14	1.2458	2.99648e-06	4.14073e-06	BGI_novel_G000009	BGI_novel_T000398
420078	10.74	24.913	1.24446	0	0	DOT1L	BGI_novel_T009063,XM_015299865.2,XM_015299864.2,XM_015299868.2,XM_025144332.1,XM_015299866.2,XM_015299869.2	XP_015155355.1|0.0e+00|PREDICTED: histone-lysine N-methyltransferase, H3 lysine-79 specific isoform X4 [Gallus gallus]
420830	18.15	42.53	1.24354	1.29053e-77	4.44512e-78	TPMT	XM_418921.6	XP_418921.1|1.3e-137|PREDICTED: thiopurine S-methyltransferase [Gallus gallus]
107049469	1.256	2.853	1.2349	1.36792e-07	1.73908e-07	LOC107049469	BGI_novel_T009978,XM_015273074.2	XP_015128560.1|1.4e-113|PREDICTED: uncharacterized protein LOC107049469 [Gallus gallus]
422893	0.193	0.456	1.23177	5.44371e-11	5.83671e-11	NAT8L	XM_015286010.2	XP_015141496.1|1.3e-187|PREDICTED: N-acetylaspartate synthetase [Gallus gallus]
396191	14.1	33.046	1.23094	8.58101e-296	1.13802e-296	TFRC	NM_205256.2,BGI_novel_T005262,XM_015291382.2	XP_015146868.1|0.0e+00|PREDICTED: transferrin receptor protein 1 isoform X1 [Gallus gallus]
416303	0.786	1.786	1.23019	9.95036e-13	9.93651e-13	KLHL3	XM_025155018.1,XM_015293956.2,XM_015293960.2,BGI_novel_T006326,XM_015293957.2	XP_005018740.1|0.0e+00|kelch-like protein 3 isoform X1 [Anas platyrhynchos]
424845	1.08	2.54	1.23008	1.62208e-31	9.89751e-32	PASK	XM_015277086.1,BGI_novel_T005146,XM_015277085.1,XM_015277087.1,XM_015277088.2	XP_015132571.1|0.0e+00|PREDICTED: PAS domain-containing serine/threonine-protein kinase isoform X1 [Gallus gallus]
422468	0.08	0.193	1.22873	0.000806448	0.00136691	TTC29	XM_004940975.3,XM_015276681.2	XP_004941032.1|3.3e-279|PREDICTED: tetratricopeptide repeat protein 29 isoform X1 [Gallus gallus]
427409	0.513	1.203	1.2277	1.65901e-09	1.90223e-09	DNAJB5	XM_015277459.2,XM_004937117.3,XM_004937118.3,XM_004937116.3,XM_015277458.2	XP_004937173.1|8.1e-212|PREDICTED: dnaJ homolog subfamily B member 5 isoform X1 [Gallus gallus]
419726	0.303	0.696	1.22184	0.000657866	0.00110467	TMEM45BL	XM_004947972.3	XP_004948029.1|1.1e-166|PREDICTED: transmembrane protein 45B-like [Gallus gallus]
420102	0.24	0.556	1.22184	5.08069e-08	6.29872e-08	ARHGAP45	XM_015299929.2,XM_025144268.1,XM_015299927.2,XM_025144267.1,XM_015299924.2,XM_015299928.2,XM_015299926.2,XM_015299930.2,NM_001030937.1,XM_015299925.2	XP_015155411.1|0.0e+00|PREDICTED: minor histocompatibility protein HA-1 isoform X2 [Gallus gallus]
776376	0.383	0.913	1.22184	0.000167095	0.000264813	LOC776376	BGI_novel_T008701,NM_001313720.1	NP_001300649.1|6.1e-184|C-reactive protein, pentraxin-related precursor [Gallus gallus]
421479	27.753	64.606	1.21858	0	0	QPCT	XM_025149300.1,XM_419527.6,XM_025149301.1	XP_419527.3|5.1e-257|PREDICTED: glutaminyl-peptide cyclotransferase [Gallus gallus]
112532971	1.896	4.386	1.21819	2.44212e-22	1.81076e-22	LOC112532971	XM_025153335.1	XP_021240347.1|2.4e-233|C-Jun-amino-terminal kinase-interacting protein 2 [Numida meleagris]
425664	13.34	30.916	1.21489	5.27462e-146	1.20608e-146	SELENBP1	XM_025143405.1,NM_001277810.1,BGI_novel_T008606,XM_015280010.2,XM_015280011.2	NP_001264739.1|1.4e-289|selenium-binding protein 1 [Gallus gallus]
417529	5.47	12.78	1.21362	6.16409e-109	1.70929e-109	RFFL	XM_025141950.1,NM_001030711.1,XM_015295722.2,XM_015295725.2,XM_025141948.1,XM_025141949.1,BGI_novel_T007578,XM_015295723.2	NP_001025882.1|5.0e-213|E3 ubiquitin-protein ligase rififylin [Gallus gallus]
421426	10.41	24.043	1.21349	7.6902e-111	2.1101e-111	SAYSD1	XM_015283796.2	XP_015139282.1|4.2e-97|PREDICTED: SAYSvFN domain-containing protein 1 [Gallus gallus]
420074	8.126	18.736	1.21241	7.74813e-83	2.57214e-83	MFSD12	XM_004948703.3,XM_418193.6	XP_418193.3|5.0e-289|PREDICTED: major facilitator superfamily domain-containing protein 12 isoform X2 [Gallus gallus]
424682	0.67	1.52	1.21009	4.76934e-32	2.88003e-32	PATJ	XM_025153272.1,BGI_novel_T005005,XM_025153269.1,XM_004936852.3,XM_025153268.1,XM_004936853.3,BGI_novel_T005004,XM_025153267.1,XM_025153273.1,XM_025153274.1,BGI_novel_T005001,BGI_novel_T005002,BGI_novel_T005003,XM_025153271.1,XM_025153270.1,BGI_novel_T005000	XP_004936911.1|0.0e+00|PREDICTED: inaD-like protein isoform X8 [Gallus gallus]
418963	2.953	6.856	1.20698	6.00858e-142	1.40013e-142	ZC3H12C	XM_015279485.2,XM_015279471.2,XM_004938821.3,BGI_novel_T001033,XM_015279477.2	XP_013817667.1|0.0e+00|PREDICTED: probable ribonuclease ZC3H12C isoform X1 [Apteryx australis mantelli]
414143	12.096	28.516	1.20059	8.46851e-209	1.51038e-209	P3H2	NM_001001530.1,XM_015291384.2,XM_015291385.2,BGI_novel_T005259	NP_001001530.1|0.0e+00|prolyl 3-hydroxylase 2 precursor [Gallus gallus]
107050437	0.026	0.06	1.19982	0.000290725	0.000472284	LOC107050437	XM_025147759.1	XP_015129594.1|0.0e+00|PREDICTED: LOW QUALITY PROTEIN: epiplakin [Gallus gallus]
428168	1.203	2.75	1.19841	4.11514e-19	3.325e-19	FAM210B	NM_001031493.1,XM_015296417.2,XM_015296418.2,BGI_novel_T007920	XP_015151904.1|4.2e-80|PREDICTED: protein FAM210B isoform X2 [Gallus gallus]
373905	266.83	608.603	1.19683	0	0	BASP1	NM_204116.3,XM_025146990.1,XM_025146988.1,XM_025146989.1	OXB63942.1|1.6e-130|hypothetical protein ASZ78_003559 [Callipepla squamata]
416585	10.57	24.153	1.19444	1.04438e-225	1.73676e-226	IL4R	XM_015294507.2,XM_015294506.2,XM_414885.6	XP_414885.4|0.0e+00|PREDICTED: interleukin-4 receptor subunit alpha isoform X2 [Gallus gallus]
769876	0.463	1.09	1.18654	2.56195e-15	2.3198e-15	PDZD3	BGI_novel_T008494,BGI_novel_T008499,BGI_novel_T008493,XM_025143256.1,BGI_novel_T008496,BGI_novel_T008498,BGI_novel_T008495,BGI_novel_T008492,XM_015298209.2,BGI_novel_T008497	XP_015153695.1|1.8e-243|PREDICTED: Na(+)/H(+) exchange regulatory cofactor NHE-RF4 [Gallus gallus]
396283	0.4	0.91	1.18387	3.83715e-06	5.34571e-06	PNAT10	NM_205340.1	OXB80018.1|2.4e-170|hypothetical protein H355_014062 [Colinus virginianus]
107057564	5.343	12.06	1.18292	2.6479e-55	1.14432e-55	LOC107057564	XM_025143998.1,BGI_novel_T008941	XP_015154961.1|2.1e-293|PREDICTED: suppressor of cytokine signaling 7 [Gallus gallus]
425055	4.203	10.553	1.1819	8.17193e-59	3.3889e-59	CYP8B1	NM_001005571.1,XM_418499.6,XM_025147312.1	XP_003206928.1|6.6e-282|PREDICTED: 7-alpha-hydroxycholest-4-en-3-one 12-alpha-hydroxylase [Meleagris gallopavo]
395667	2.063	4.653	1.18082	1.32602e-38	7.25762e-39	ANPEP	NM_204861.1,BGI_novel_T005628	XP_010715973.1|0.0e+00|PREDICTED: aminopeptidase N [Meleagris gallopavo]
100858447	0.49	0.98	1.17867	1.48411e-05	2.15057e-05	OTOS	NM_001277706.1,BGI_novel_T005153	NP_001264635.1|4.1e-42|otospiralin precursor [Gallus gallus]
417707	15.756	35.806	1.17764	5.05134e-299	6.62564e-300	NAMPT	NM_001030728.1,XM_015275716.2	XP_021240255.1|0.0e+00|nicotinamide phosphoribosyltransferase isoform X1 [Numida meleagris]
431250	0.09	0.203	1.17717	9.8106e-05	0.000152318	LOC431250	XM_025146750.1	XP_015130348.1|1.9e-202|PREDICTED: G-protein coupled receptor 183-like [Gallus gallus]
415809	3.356	7.576	1.17632	2.58693e-35	1.48364e-35	PNAT3	XM_025154183.1,BGI_novel_T005785,BGI_novel_T005784,XM_015292528.2,XM_015292529.2,XM_025154182.1,NM_001004373.1	NP_001004373.1|4.5e-168|arylamine N-acetyltransferase, pineal gland isozyme NAT-3 [Gallus gallus]
419755	5.173	11.636	1.17594	5.92625e-92	1.83552e-92	NLRX1	XM_004948038.3,XM_003642592.4,XM_015298202.2,XM_015298203.1	XP_004948095.1|0.0e+00|PREDICTED: NLR family member X1 isoform X1 [Gallus gallus]
770936	1.226	2.62	1.17516	3.0016e-18	2.48516e-18	LOC770936	BGI_novel_T006064,XM_025154711.1	XP_010716876.1|9.3e-211|PREDICTED: SRSF protein kinase 3-like isoform X1 [Meleagris gallopavo]
415666	0.196	0.43	1.17326	4.94689e-10	5.53436e-10	RLTPR	XM_015279170.2,BGI_novel_T005676,BGI_novel_T005674,XM_015279171.2,XM_414033.6,BGI_novel_T005675,BGI_novel_T005673	XP_414033.4|0.0e+00|PREDICTED: leucine-rich repeat-containing protein 16C isoform X1 [Gallus gallus]
416534	0.453	1	1.17288	6.02011e-10	6.76507e-10	MSLN	XM_025155219.1,BGI_novel_T006464,XM_015294432.2,XM_025155218.1,XM_015294436.2,XM_004945223.3	XP_414835.3|0.0e+00|PREDICTED: mesothelin [Gallus gallus]
427107	21.593	48.566	1.17194	0	0	ARRDC3	BGI_novel_T009585,XM_015280550.2,XM_424699.5,BGI_novel_T009586	XP_424699.2|9.1e-243|PREDICTED: arrestin domain-containing protein 3 isoform X1 [Gallus gallus]
101749230	0.796	1.793	1.17157	2.26461e-39	1.22346e-39	C14orf132	XM_004941906.3	XP_004941963.1|2.2e-148|PREDICTED: uncharacterized protein C14orf132 homolog [Gallus gallus]
417393	1.973	4.433	1.17136	3.06404e-61	1.22544e-61	STXBP4	BGI_novel_T007368,XM_415648.6,XM_004946157.3	XP_004946214.1|0.0e+00|PREDICTED: syntaxin-binding protein 4 isoform X1 [Gallus gallus]
416419	0.066	0.313	1.16923	4.69948e-05	7.0736e-05	SHISA9	XM_015294311.2,XM_015294307.2	XP_015149793.1|3.0e-277|PREDICTED: protein shisa-9 isoform X3 [Gallus gallus]
428744	0.096	0.21	1.1684	0.000335835	0.000548638	ARHGEF38	XM_025150027.1,XM_426302.6	XP_426302.3|0.0e+00|PREDICTED: rho guanine nucleotide exchange factor 38 [Gallus gallus]
418106	5.343	12.483	1.1684	2.25683e-106	6.36605e-107	TRIM24	XM_015287551.2,XM_015287546.2	XP_015143032.1|0.0e+00|PREDICTED: transcription intermediary factor 1-alpha isoform X1 [Gallus gallus]
417828	22.486	50.366	1.16642	0	0	RASSF3	XM_015281595.2,NM_001007851.1,XM_015281591.1,XM_015281587.2	XP_015137073.1|1.5e-187|PREDICTED: ras association domain-containing protein 3 isoform X1 [Gallus gallus]
107049603	0.233	0.516	1.16483	6.04365e-08	7.51892e-08	LOC107049603	XM_025144513.1,XM_015273318.2	XP_015128804.1|9.0e-182|PREDICTED: LOW QUALITY PROTEIN: protein fosB-like [Gallus gallus]
418115	1.626	3.626	1.16303	1.55037e-35	8.86904e-36	DENND2A	BGI_novel_T000348,XM_004937866.3,XM_025156008.1,XM_025156009.1,XM_025156011.1,XM_025156010.1,BGI_novel_T000347	XP_004937923.2|0.0e+00|PREDICTED: DENN domain-containing protein 2A isoform X1 [Gallus gallus]
769542	1.326	2.95	1.15889	2.21621e-08	2.69592e-08	GNMT	XM_015283547.2,XM_015283546.2	XP_015139032.1|1.6e-170|PREDICTED: glycine N-methyltransferase isoform X1 [Gallus gallus]
107054196	23.413	52.12	1.15808	0	0	MEX3B	XM_015292033.2,BGI_novel_T005538,BGI_novel_T005539	XP_015147519.1|0.0e+00|PREDICTED: RNA-binding protein MEX3B [Gallus gallus]
776432	1.126	2.57	1.15604	1.06271e-10	1.15732e-10	RDH16	XM_015300397.2,BGI_novel_T009801	XP_015155883.1|8.9e-246|PREDICTED: retinol dehydrogenase 16-like [Gallus gallus]
107050017	2.566	5.683	1.15401	5.0701e-21	3.89003e-21	LOC107050017	XM_015273822.2	XP_015129308.1|8.2e-123|PREDICTED: transcription factor jun-D-like [Gallus gallus]
416745	40.123	88.903	1.15051	0	0	COQ8A	XM_015283507.2,NM_001199413.1	NP_001186342.1|0.0e+00|atypical kinase ADCK3, mitochondrial [Gallus gallus]
112530066	1.35	2.966	1.15006	1.80851e-13	1.7496e-13	LOC112530066	XM_025142047.1
100858585	0.636	1.406	1.14627	2.63747e-07	3.4019e-07	OTX1	XM_015278112.2	XP_015133598.1|1.4e-198|PREDICTED: homeobox protein OTX1 [Gallus gallus]
431663	6.396	14.116	1.14578	2.8239e-297	3.72748e-298	NPR3	XM_004937171.3,XM_015277504.2,XM_004937173.3,XM_004937172.3,XM_003642974.4	XP_003643022.1|2.1e-303|PREDICTED: atrial natriuretic peptide receptor 3 isoform X1 [Gallus gallus]
100857276	2.353	5.113	1.14504	2.9343e-52	1.31628e-52	KIAA1644	BGI_novel_T000429,XM_015291144.2,XM_015291097.2	XP_004938094.1|2.9e-121|PREDICTED: uncharacterized protein KIAA1644 homolog isoform X1 [Gallus gallus]
420853	17.253	37.55	1.14377	1.01128e-97	3.02499e-98	TBC1D7	XM_025147648.1,XM_004939651.3,XM_015275976.2,BGI_novel_T001529,XM_015275977.2,XM_418942.6	XP_418942.3|5.0e-168|PREDICTED: TBC1 domain family member 7 isoform X1 [Gallus gallus]
395603	3.613	7.87	1.14026	3.59965e-51	1.63944e-51	FGFR4	BGI_novel_T006252,XM_025154976.1,XM_015293863.2,XM_015293864.2	XP_021266592.1|0.0e+00|fibroblast growth factor receptor 4 isoform X3 [Numida meleagris]
423330	1.28	3.283	1.13916	1.50434e-15	1.35528e-15	SLC25A21	XM_025150919.1,XM_025150917.1,XM_025150921.1,XM_025150923.1,XM_025150918.1,XM_015287659.2,XM_025150922.1,XM_025150920.1	XP_015143145.1|1.9e-138|PREDICTED: mitochondrial 2-oxodicarboxylate carrier isoform X3 [Gallus gallus]
112531450	1.236	2.67	1.13879	7.96831e-12	8.21892e-12	LOC112531450	BGI_novel_T010118,XM_025146553.1	XP_001346314.3|1.1e-88|large neutral amino acids transporter small subunit 2 [Danio rerio]
107050564	0.556	1.16	1.13745	1.59006e-05	2.30873e-05	LOC107050564	XM_025155581.1,XM_025155580.1,XM_015274291.2	XP_015129777.1|1.2e-140|PREDICTED: fibroblast growth factor 11-like [Gallus gallus]
112533254	1.436	3.146	1.13618	1.25197e-09	1.4285e-09	PDF	XM_025154248.1	OXB78364.1|4.0e-117|hypothetical protein H355_009135 [Colinus virginianus]
421178	0.22	0.483	1.13446	3.00218e-11	3.17836e-11	KIF21B	XM_004934814.3,XM_015298720.2	XP_015154206.1|0.0e+00|PREDICTED: kinesin-like protein KIF21B isoform X2 [Gallus gallus]
414741	0.856	1.883	1.13409	3.67169e-07	4.78091e-07	CD74	NM_001001613.1,XM_015293754.2	XP_015149240.1|1.2e-120|PREDICTED: HLA class II histocompatibility antigen gamma chain isoform X1 [Gallus gallus]
396537	0.486	1.06	1.13325	0.000208152	0.000333082	NAT	NM_205526.2	NP_990857.2|2.0e-172|arylamine N-acetyltransferase, liver isozyme [Gallus gallus]
771069	0.346	0.9	1.13325	0.000208152	0.000333082	LOC771069	XM_004947408.3,XM_001233573.5	XP_001233574.1|5.6e-139|PREDICTED: C-factor-like isoform X1 [Gallus gallus]
417645	8.31	18.18	1.13268	6.82899e-119	1.79714e-119	APPBP2	NM_001030723.1	NP_001025894.1|0.0e+00|amyloid protein-binding protein 2 [Gallus gallus]
428527	4.863	10.8	1.13258	3.50073e-126	8.88517e-127	DSC1	XM_015282597.2,XM_004939816.3,XM_426081.5,XM_015282598.2	XP_015138084.1|0.0e+00|PREDICTED: desmocollin-2 isoform X4 [Gallus gallus]
423962	0.106	0.256	1.13248	0.000139733	0.000220083	PTPRE	XM_004942358.3,XM_015289044.2,BGI_novel_T004276,XM_004942357.3,BGI_novel_T004277,XM_015289042.2,BGI_novel_T004274,XM_025151670.1,XM_015289041.2,BGI_novel_T004275	XP_021254916.1|0.0e+00|receptor-type tyrosine-protein phosphatase epsilon isoform X1 [Numida meleagris]
100859884	2.27	5.033	1.13207	2.21119e-34	1.28378e-34	SYVN1	BGI_novel_T009778,XM_025145472.1,XM_025145471.1,BGI_novel_T009779,XM_025145470.1	XP_015128719.1|3.4e-254|PREDICTED: E3 ubiquitin-protein ligase synoviolin-like, partial [Gallus gallus]
769107	5.86	12.83	1.13121	1.79536e-84	5.88538e-85	HTR1D	XM_015297583.1,BGI_novel_T008262,BGI_novel_T008261	XP_015153069.1|3.7e-215|PREDICTED: 5-hydroxytryptamine receptor 1D [Gallus gallus]
419210	7.23	15.79	1.13101	3.89874e-302	5.04899e-303	PREX1	XM_015296691.2,XM_015296692.2	XP_015152178.1|0.0e+00|PREDICTED: phosphatidylinositol 3,4,5-trisphosphate-dependent Rac exchanger 1 protein isoform X2 [Gallus gallus]
395847	1.223	2.66	1.13063	1.68491e-10	1.85068e-10	MLLT11	XM_025143615.1,XM_003642685.4,XM_004948350.3,BGI_novel_T008594	BAA05378.1|1.4e-86|unnamed protein product, partial [Gallus gallus]
101748150	4.803	10.413	1.12852	1.23147e-21	9.28719e-22	NUDT8	BGI_novel_T003302,XM_025151025.1	XP_015141791.1|2.5e-106|PREDICTED: nucleoside diphosphate-linked moiety X motif 8 [Gallus gallus]
373997	208.913	454.07	1.12821	0	0	LDHB	NM_204177.2	XP_015724692.1|2.7e-191|PREDICTED: L-lactate dehydrogenase B chain [Coturnix japonica]
101747820	0.86	1.86	1.12767	1.73985e-09	1.9971e-09	LOC101747820	XM_025150444.1	XP_004949921.2|0.0e+00|PREDICTED: protein FAM196B-like [Gallus gallus]
373990	1.59	3.453	1.12698	1.80268e-25	1.24446e-25	TBX2	XM_001235320.5	XP_001235321.3|0.0e+00|PREDICTED: T-box transcription factor TBX2 [Gallus gallus]
417287	7.126	15.423	1.12561	8.59664e-144	1.98891e-144	TRAF2	XM_015279618.2,XM_015279622.2,XM_015279619.2,BGI_novel_T007064,XM_015279623.2,BGI_novel_T007065,XM_025141427.1,XM_015279621.2	XP_015135107.1|0.0e+00|PREDICTED: TNF receptor-associated factor 2 isoform X3 [Gallus gallus]
396068	1.246	2.71	1.12477	3.93653e-19	3.17741e-19	KCNAB2	XM_015297067.1,XM_025142685.1,BGI_novel_T007963,XM_015297065.2,XM_025142687.1,XM_015297066.2,XM_025142686.1,XM_001232953.5	XP_001232954.1|3.8e-226|PREDICTED: voltage-gated potassium channel subunit beta-2 isoform X2 [Gallus gallus]
112533563	0.366	0.8	1.12466	5.79342e-05	8.79003e-05	LOC112533563	XM_025155957.1	ADT65169.1|5.0e-101|leukocyte receptor cluster member 9-like protein [Meleagris gallopavo]
416817	5.483	11.926	1.12316	1.34836e-81	4.50697e-82	CCDC92	XM_415108.5,XM_004945530.3,XM_004945529.3,XM_025155654.1,XM_025155655.1	XP_415108.2|3.4e-173|PREDICTED: coiled-coil domain-containing protein 92 [Gallus gallus]
107050574	0.253	0.546	1.12181	5.09258e-07	6.70196e-07	LOC107050574	XM_025143441.1,BGI_novel_T008614	XP_010563905.1|2.3e-218|PREDICTED: integrin alpha-10 [Haliaeetus leucocephalus]
420610	73.416	134.003	1.11924	8.61078e-275	1.20283e-275	TOMM7	BGI_novel_T001346,NM_001199617.1	XP_010575914.1|2.6e-29|PREDICTED: mitochondrial import receptor subunit TOM7 homolog [Haliaeetus leucocephalus]
425667	0.32	0.693	1.1191	1.80706e-05	2.6362e-05	TDRKH	XM_015280019.2,BGI_novel_T008609,XM_025143429.1	XP_015135505.1|3.0e-302|PREDICTED: tudor and KH domain-containing protein [Gallus gallus]
771557	4.973	10.756	1.11681	7.30399e-57	3.10033e-57	ENG	NM_001080887.1,BGI_novel_T007104	NP_001074356.1|0.0e+00|endoglin precursor [Gallus gallus]
770610	0.67	1.453	1.11537	3.6141e-25	2.51598e-25	ABCA7	XM_015299986.2,XM_025144353.1,XM_025144354.1	XP_019465591.1|0.0e+00|PREDICTED: LOW QUALITY PROTEIN: ATP-binding cassette sub-family A member 7 [Meleagris gallopavo]
BGI_novel_G000299	2.823	6.14	1.11475	3.35321e-42	1.737e-42	BGI_novel_G000299	BGI_novel_T010085
424371	1.79	4.07	1.1143	2.1539e-27	1.43006e-27	NOS1AP	XM_004943150.3,BGI_novel_T004706,XM_004943151.3	XP_004943208.1|7.4e-283|PREDICTED: carboxyl-terminal PDZ ligand of neuronal nitric oxide synthase protein isoform X2 [Gallus gallus]
101752124	0.363	0.786	1.11417	3.45333e-20	2.7077e-20	MUC4	BGI_novel_T005265,XM_015291448.2,XM_015291449.2,XM_015291450.2,XM_025153622.1	XP_015146934.1|0.0e+00|PREDICTED: mucin-4 isoform X1 [Gallus gallus]
427417	23.7	51.083	1.11156	4.07799e-289	5.51847e-290	CREB3	XM_424990.6	XP_424990.1|7.6e-254|PREDICTED: cyclic AMP-responsive element-binding protein 3 [Gallus gallus]
395813	10.346	22.086	1.11144	2.25572e-28	1.46108e-28	HAND2	NM_204966.2	NP_990297.2|1.2e-123|heart- and neural crest derivatives-expressed protein 2 [Gallus gallus]
428932	3.726	8.023	1.11099	3.29772e-68	1.23184e-68	GPR137C	XM_015276773.2	XP_015132259.1|1.5e-226|PREDICTED: integral membrane protein GPR137C [Gallus gallus]
423077	1.116	2.36	1.11093	1.87726e-21	1.42159e-21	SERGEF	XM_015286659.2,XM_015286660.2,BGI_novel_T003426,XM_004941419.3	XP_004941476.1|3.4e-239|PREDICTED: secretion-regulating guanine nucleotide exchange factor isoform X3 [Gallus gallus]
415479	1.306	2.69	1.11	1.39758e-19	1.11761e-19	ABHD17C	XM_025153838.1,NM_001007826.1	NP_001007827.1|1.9e-182|protein ABHD17C [Gallus gallus]
BGI_novel_G000218	0.37	0.786	1.10819	0.000236322	0.000380467	BGI_novel_G000218	BGI_novel_T008937
107053339	1.93	4.123	1.10767	4.48073e-10	5.0026e-10	TMEM109	XM_015286129.2	XP_015141615.1|8.4e-116|PREDICTED: transmembrane protein 109 [Gallus gallus]
419365	3.156	6.566	1.10713	2.56996e-30	1.61281e-30	TNFRSF9	XM_015297003.2,BGI_novel_T007954,BGI_novel_T007955	XP_015152489.1|3.6e-159|PREDICTED: tumor necrosis factor receptor superfamily member 9 [Gallus gallus]
395107	6.343	14.123	1.1054	1.36558e-140	3.19347e-141	FGFRL1	XM_025149472.1,XM_025149470.1,XM_025149471.1,NM_204456.1	NP_989787.1|2.0e-291|fibroblast growth factor receptor-like 1 precursor [Gallus gallus]
419734	1.463	2.956	1.10485	1.0716e-39	5.75149e-40	SNX19	BGI_novel_T008461,XM_015298131.2,XM_004947993.3,XM_003642598.4,BGI_novel_T008460,XM_025143365.1,XM_025143364.1,XM_015298133.2,XM_004947994.3	XP_004948051.1|0.0e+00|PREDICTED: sorting nexin-19 isoform X4 [Gallus gallus]
426411	285.13	610.846	1.10324	0	0	LOXL1	XM_424060.6	XP_424060.5|0.0e+00|PREDICTED: lysyl oxidase homolog 1 [Gallus gallus]
420050	1.836	3.973	1.10245	1.08442e-26	7.30807e-27	CERS4	XM_004948648.2,XM_025144428.1,XM_418172.6,XM_025144429.1,XM_025144427.1,XM_004948647.3	XP_004948704.1|2.8e-257|PREDICTED: ceramide synthase 4 isoform X1 [Gallus gallus]
395569	0.226	0.48	1.10183	2.51014e-05	3.69845e-05	GDNF	XM_004937198.3,XM_015277532.2,XM_425018.6,XM_015277531.2	XP_021236894.1|9.3e-138|glial cell line-derived neurotrophic factor isoform X1 [Numida meleagris]
418229	1.33	2.87	1.10176	5.95946e-24	4.26764e-24	MPPED1	XM_015291255.2,XM_025142204.1,XM_015291240.2,XM_015291253.2,XM_015291244.2,XM_416454.6,XM_015291238.2	XP_010408568.1|2.7e-185|metallophosphoesterase domain-containing protein 1 isoform X2 [Corvus cornix cornix]
425184	5.523	11.673	1.09942	4.16961e-14	3.94452e-14	FAM195A	XM_422971.6	OXB57831.1|6.6e-81|hypothetical protein H355_003483 [Colinus virginianus]
422616	0.343	0.763	1.09539	3.05624e-13	2.98274e-13	ADGRL3	XM_004941151.3,XM_015276451.2,XM_015276457.2,XM_025149811.1,XM_015276456.2,XM_015276458.2,XM_004941148.3,XM_420575.6,XM_015276462.2,XM_015276460.2,XM_025149809.1,XM_015276449.2,XM_025149810.1,XM_015276453.2,XM_015276459.2,XM_025149808.1,XM_015276452.2,XM_015276455.2,XM_015276454.2,XM_015276461.2,XM_015276450.2,XM_025149807.1	XP_015717200.1|0.0e+00|PREDICTED: adhesion G protein-coupled receptor L3 isoform X1 [Coturnix japonica]
100857847	11.686	24.626	1.09511	2.08312e-25	1.44022e-25	CISD3	XM_003642801.3	XP_003642849.1|1.1e-56|PREDICTED: CDGSH iron-sulfur domain-containing protein 3, mitochondrial [Gallus gallus]
769770	5.9	12.533	1.09487	6.28322e-26	4.29705e-26	ATP6V0E2	NM_001277388.1,NM_001277387.1	XP_021254764.1|2.7e-56|V-type proton ATPase subunit e 2 [Numida meleagris]
374242	1.856	4.1	1.09382	1.03572e-95	3.13039e-96	DCX	XM_015278178.2,NM_001305674.2,BGI_novel_T002691,NM_204335.3,XM_015278174.2,XM_015278176.2,XM_015278175.2,XM_015278173.2,XM_015278179.2,BGI_novel_T002690,XM_015278177.2,BGI_novel_T002692	XP_021124988.1|3.7e-212|neuronal migration protein doublecortin isoform X2 [Anas platyrhynchos]
418373	1.016	2.156	1.09071	1.41749e-21	1.07077e-21	SFT2D2	XM_416592.6	XP_416592.1|1.7e-85|PREDICTED: vesicle transport protein SFT2B [Gallus gallus]
769912	2.886	6.143	1.09006	6.2906e-57	2.66887e-57	PITPNM1	XM_015286292.2	XP_015141778.1|0.0e+00|PREDICTED: membrane-associated phosphatidylinositol transfer protein 1 isoform X2 [Gallus gallus]
100857843	2.033	4.303	1.08927	1.7094e-14	1.59438e-14	LOC100857843	XM_003641915.4,XM_015279192.2	XP_015134678.1|8.1e-92|PREDICTED: RNA-binding Raly-like protein isoform X2 [Gallus gallus]
420277	6.38	13.42	1.08812	6.24699e-85	2.03225e-85	SYBU	BGI_novel_T001833,XM_015283014.2,XM_025148138.1,BGI_novel_T001835,XM_015283015.2,BGI_novel_T001834,XM_025148137.1,XM_015283016.2	XP_015138502.1|0.0e+00|PREDICTED: syntabulin isoform X3 [Gallus gallus]
770750	14.28	27.133	1.08592	1.79298e-41	9.39965e-42	PHPT1	XM_015279535.2,BGI_novel_T007066,NM_001277693.1,NM_001277692.1	NP_001264621.1|3.9e-67|14 kDa phosphohistidine phosphatase isoform 1 [Gallus gallus]
771574	0.216	0.443	1.08434	0.000177423	0.000281807	PLA2G4EL2	XM_004941646.3,XM_001234837.4	XP_001234838.2|0.0e+00|PREDICTED: cytosolic phospholipase A2 epsilon isoform X1 [Gallus gallus]
BGI_novel_G000069	0.403	0.856	1.08434	8.98196e-07	1.1996e-06	BGI_novel_G000069	BGI_novel_T002185
422107	1.343	2.756	1.08295	1.40835e-06	1.90437e-06	CD300LG	NM_001039295.1,XM_015295393.2	XP_015150879.1|4.4e-178|PREDICTED: CMRF35-like molecule 8 isoform X1 [Gallus gallus]
418770	0.95	2.006	1.08245	8.85932e-35	5.11225e-35	NALCN	XM_015274991.2,XM_015274986.2	XP_015130472.1|0.0e+00|PREDICTED: sodium leak channel non-selective protein isoform X1 [Gallus gallus]
420603	7.456	15.693	1.08234	7.1732e-33	4.27049e-33	TWISTNB	NM_001199615.1	NP_001186544.1|2.3e-185|DNA-directed RNA polymerase I subunit RPA43 [Gallus gallus]
101747829	0.206	0.433	1.08042	0.000125055	0.000196211	BTBD18	BGI_novel_T003490,XM_025151172.1,XM_025151170.1,XM_025151171.1,BGI_novel_T003491	XP_021259270.1|3.2e-126|BTB/POZ domain-containing protein 18 [Numida meleagris]
107049980	0.563	1.06	1.07916	0.000719329	0.00121311	LOC107049980	BGI_novel_T006940,XM_025155998.1	XP_015128921.1|1.1e-43|PREDICTED: uncharacterized protein LOC100859910 [Gallus gallus]
395114	20.583	42.92	1.07909	6.17669e-49	2.90815e-49	RHOQ	NM_204461.1	NP_989792.1|2.6e-120|rho-related GTP-binding protein RhoQ [Gallus gallus]
422931	9.71	20.436	1.07807	1.23325e-80	4.14528e-81	RPIA	NM_001031170.1	XP_015718371.1|1.6e-152|PREDICTED: ribose-5-phosphate isomerase [Coturnix japonica]
414745	58.82	123.453	1.07669	0	0	CDH2	NM_001001615.1,XM_025147080.1,BGI_novel_T001706	XP_005517260.1|0.0e+00|PREDICTED: cadherin-2 [Pseudopodoces humilis]
422329	21.993	46.223	1.07409	0	0	ZDHHC15	XM_025150053.1,BGI_novel_T002676,BGI_novel_T002680,BGI_novel_T002678,XM_420303.5,BGI_novel_T002679,BGI_novel_T002681,BGI_novel_T002677,BGI_novel_T002682,XM_004940794.3,XM_025150054.1	XP_004940851.2|1.6e-202|PREDICTED: palmitoyltransferase ZDHHC15 isoform X1 [Gallus gallus]
396317	2.05	4.29	1.07278	1.35906e-17	1.14641e-17	ALPL	BGI_novel_T008108,NM_205360.1	NP_990691.1|9.3e-304|alkaline phosphatase, tissue-nonspecific isozyme precursor [Gallus gallus]
419067	3.196	10.073	1.07198	3.76391e-51	1.71503e-51	RELT	XM_025152482.1,XM_025152485.1,XM_015281000.2,XM_025152486.1	XP_015136486.1|3.5e-199|PREDICTED: tumor necrosis factor receptor superfamily member 19L [Gallus gallus]
421817	374.08	782.463	1.07172	0	0	PNRC1	NM_001012291.1	XP_010705939.1|1.1e-189|PREDICTED: proline-rich nuclear receptor coactivator 1 [Meleagris gallopavo]
422055	15.876	62.6	1.07152	5.99211e-33	3.56361e-33	ENPP4	XM_025148805.1,BGI_novel_T002520,XM_015285142.2,BGI_novel_T002521,BGI_novel_T002519,NM_001006422.2	NP_001006422.2|5.9e-271|ectonucleotide pyrophosphatase/phosphodiesterase family member 4 precursor [Gallus gallus]
768655	35.043	73.496	1.07122	0	0	PIM3	XM_003640342.4	XP_003640390.1|3.9e-187|PREDICTED: serine/threonine-protein kinase pim-3 [Gallus gallus]
421286	5.896	12.166	1.07116	1.4945e-66	5.6727e-67	B3GNT2	NM_001008457.1,XM_015278058.2,XM_015278054.2,XM_015278056.1,XM_015278060.2,XM_015278061.2,XM_025148645.1,XM_015278059.2,XM_015278055.2,XM_025148646.1,XM_025148647.1,XM_015278053.2,BGI_novel_T002009	NP_001008457.1|1.2e-233|N-acetyllactosaminide beta-1,3-N-acetylglucosaminyltransferase 2 [Gallus gallus]
101748318	0.473	0.996	1.07079	7.97013e-11	8.62174e-11	CCDC177	XM_015287583.1	XP_015143069.1|0.0e+00|PREDICTED: coiled-coil domain-containing protein 177 [Gallus gallus]
423003	4.21	8.786	1.06998	1.12882e-18	9.25919e-19	GCHFR	NM_001199522.1	NP_001186451.1|1.6e-42|GTP cyclohydrolase 1 feedback regulatory protein [Gallus gallus]
421352	20.786	43.49	1.06938	0	0	TGFB2	NM_001031045.3	NP_001026216.2|1.0e-242|transforming growth factor beta-2 precursor [Gallus gallus]
101748192	6.88	14.403	1.06898	6.064e-73	2.16306e-73	ZNF629L	BGI_novel_T009979,XM_025146032.1	XP_010568991.1|3.6e-181|PREDICTED: zinc finger protein 2 homolog [Haliaeetus leucocephalus]
107051159	1.336	2.786	1.0681	6.63074e-13	6.57878e-13	LOC107051159	XM_025145508.1	XP_014969371.1|2.8e-86|PREDICTED: neurexin-2-beta isoform X22 [Macaca mulatta]
430755	0.39	0.816	1.06619	5.86126e-05	8.89662e-05	SERINC4	XM_025153940.1,XM_015292177.2	XP_015147663.1|0.0e+00|PREDICTED: serine incorporator 4 isoform X3 [Gallus gallus]
422150	10.906	22.71	1.066	8.37864e-81	2.81279e-81	LOC422150	XM_025150161.1,XM_420151.5	XP_420151.1|1.3e-127|PREDICTED: lysophosphatidic acid receptor 4 [Gallus gallus]
395891	4.15	8.793	1.06576	2.20794e-216	3.80941e-217	CACNA1C	XM_015286524.2,XM_015286607.2,XM_015286547.2,BGI_novel_T000375,XM_015286558.2,XM_015286657.2,XM_015286441.2,XM_015286516.2,XM_015286498.2,XM_015286536.2,XM_015286450.2,XM_015286473.2,XM_015286652.2,BGI_novel_T000376,XM_015286569.2,XM_015286510.2,XM_015286478.2,BGI_novel_T000377,BGI_novel_T000378,XM_015286578.2,XM_015286598.2,XM_015286628.2,BGI_novel_T000374,XM_015286581.2,XM_015286520.2,XM_015286…	XP_015141950.1|0.0e+00|PREDICTED: voltage-dependent L-type calcium channel subunit alpha-1C isoform X4 [Gallus gallus]
420308	0.64	1.28	1.06572	2.00205e-24	1.41621e-24	SLC45A4	XM_418418.6,XM_015283236.2,BGI_novel_T001898,XM_015283237.2,XM_015283238.2	XP_418418.5|0.0e+00|PREDICTED: solute carrier family 45 member 4 [Gallus gallus]
395203	0.743	1.54	1.06523	8.80461e-05	0.000135875	SH3GL2	NM_204530.1	NP_989861.1|1.8e-201|endophilin-A1 [Gallus gallus]
430150	3.883	8.123	1.0643	6.94572e-89	2.19748e-89	CACNA2D2	XM_015292785.2,XM_015292788.2,XM_015292786.2,BGI_novel_T005908,XM_015292787.2	XP_015148273.1|0.0e+00|PREDICTED: voltage-dependent calcium channel subunit alpha-2/delta-2 isoform X3 [Gallus gallus]
396501	2.216	4.806	1.064	1.98545e-22	1.46555e-22	GJC1	XM_015299213.2,XM_025143958.1,XM_015299219.2,NM_205503.1,XM_015299220.2,XM_025143956.1,BGI_novel_T008853,XM_025143959.1,XM_015299221.2,XM_025143957.1,XM_015299222.2	NP_990834.1|2.5e-231|gap junction gamma-1 protein [Gallus gallus]
100858941	2.9	13.036	1.06395	1.06072e-128	2.65032e-129	LOC100858941	XM_025145249.1,XM_025145250.1,BGI_novel_T009433,XM_004949075.3,BGI_novel_T009434,XM_015280212.2,XM_004949076.3	XP_004949133.1|4.9e-158|PREDICTED: uncharacterized protein LOC100858941 isoform X4 [Gallus gallus]
107051305	0.566	1.183	1.06328	4.07847e-13	4.00412e-13	LOC107051305	XM_025146448.1	XP_021410575.1|2.8e-81|sodium channel subunit beta-1 [Lonchura striata domestica]
427627	10.603	21.963	1.0625	3.26981e-40	1.74274e-40	RAB24	NM_001277713.1	NP_001264642.1|3.6e-113|ras-related protein Rab-24 [Gallus gallus]
100857442	1.823	3.776	1.06138	1.64747e-09	1.88866e-09	LYSMD1	XM_003642688.4	XP_003642736.2|9.7e-134|PREDICTED: lysM and putative peptidoglycan-binding domain-containing protein 1 [Gallus gallus]
BGI_novel_G000179	0.353	0.746	1.06006	8.88731e-06	1.26584e-05	BGI_novel_G000179	BGI_novel_T006964
101748321	2.806	5.836	1.05736	7.63886e-119	2.01186e-119	MYO9A	XM_025154115.1,XM_015279073.2,XM_015279071.2,XM_015279072.2,BGI_novel_T005407,XM_015279074.2,XM_015279067.2,BGI_novel_T005406,XM_025154116.1,BGI_novel_T005405,XM_015279075.2,XM_015279068.2,XM_015279070.2	XP_015134556.1|0.0e+00|PREDICTED: unconventional myosin-IXa isoform X2 [Gallus gallus]
430761	0.323	0.693	1.05593	1.03384e-05	1.48069e-05	KIF20AL	XM_025147966.1,XM_025147964.1,BGI_novel_T001737,XM_015282689.2,BGI_novel_T001738,BGI_novel_T001735,BGI_novel_T001736,XM_025147969.1,XM_025147968.1,BGI_novel_T001734,XM_025147967.1,XM_003640837.4	XP_003640885.3|0.0e+00|PREDICTED: kinesin-like protein KIF20A isoform X1 [Gallus gallus]
417544	146.54	301.24	1.05451	0	0	CHCHD2	XM_015295733.2,NM_001006218.1	XP_015151219.1|2.0e-77|PREDICTED: coiled-coil-helix-coiled-coil-helix domain-containing protein 2 isoform X1 [Gallus gallus]
427626	0.513	1.063	1.05422	1.67141e-11	1.75108e-11	NEURL1B	BGI_novel_T006229,XM_015293831.2,BGI_novel_T006228,BGI_novel_T006227,XM_015293832.2,XM_015293830.2,XM_425198.6,XM_004944869.3	XP_004944926.1|0.0e+00|PREDICTED: E3 ubiquitin-protein ligase NEURL1B isoform X3 [Gallus gallus]
418226	66.52	136.786	1.05056	1.76644e-262	2.59603e-263	TSPO	XM_015290498.1,XM_025149058.1,XM_015290491.2,NM_001278057.1	NP_001264986.1|5.8e-96|translocator protein [Gallus gallus]
419229	0.91	1.923	1.04927	4.51469e-20	3.5526e-20	CABLES2	XM_015296656.2,BGI_novel_T007843,XM_015296655.2	XP_015152141.1|0.0e+00|PREDICTED: CDK5 and ABL1 enzyme substrate 2 isoform X1 [Gallus gallus]
420403	41.233	84.6	1.04795	3.41023e-191	6.51465e-192	TNFRSF14	XM_418509.6,BGI_novel_T001200	XP_418509.4|7.7e-161|PREDICTED: tumor necrosis factor receptor superfamily member 16-like [Gallus gallus]
416764	42.086	86.683	1.04653	1.03703e-300	1.34729e-301	SLC25A1	XM_415059.6,XM_025155588.1	XP_415059.2|9.9e-161|PREDICTED: tricarboxylate transport protein, mitochondrial [Gallus gallus]
416069	2.08	4.336	1.04481	1.68121e-10	1.84626e-10	FAM3D	XM_015293314.2,XM_025154631.1,XM_414407.6	XP_414407.3|1.2e-126|PREDICTED: protein FAM3D [Gallus gallus]
107051310	16.713	34.326	1.04345	2.89829e-119	7.59111e-120	LOC107051310	XM_025144524.1	XP_017358684.1|3.1e-214|PREDICTED: latent-transforming growth factor beta-binding protein 4 isoform X3 [Cebus capucinus imitator]
427539	10.573	21.763	1.04301	2.36335e-154	5.19273e-155	B3GNT9	XM_003641907.4	XP_003641955.1|3.3e-244|PREDICTED: UDP-GlcNAc:betaGal beta-1,3-N-acetylglucosaminyltransferase 9 [Gallus gallus]
374064	1.023	2.053	1.04159	1.71367e-12	1.72517e-12	PFKM	NM_204223.2,XM_015273040.2,BGI_novel_T009837	NP_989554.3|0.0e+00|ATP-dependent 6-phosphofructokinase, muscle type [Gallus gallus]
771980	0.126	0.263	1.03703	0.000506893	0.000841785	FAM78A	XM_001233856.5	OXB69092.1|8.8e-160|hypothetical protein ASZ78_009568 [Callipepla squamata]
771763	0.743	1.526	1.03674	1.415e-10	1.55069e-10	ANGPT4	XM_001235002.5,XM_025142329.1	XP_001235003.2|3.9e-278|PREDICTED: angiopoietin-4 [Gallus gallus]
423764	6.336	12.973	1.03668	8.53177e-135	2.05371e-135	SEC31B	XM_004942109.3,XM_001232875.5,XM_015288455.2,BGI_novel_T004110,XM_015288456.1	XP_004942166.1|0.0e+00|PREDICTED: protein transport protein Sec31B isoform X1 [Gallus gallus]
396309	0.916	1.906	1.03624	3.26767e-30	2.05609e-30	ANK3	XM_025151500.1,NM_001277097.1,XM_025151497.1,BGI_novel_T004001,XM_025151491.1,XM_025151493.1,XM_025151499.1,XM_025151492.1,XM_025151498.1,XM_025151502.1,XM_025151501.1,XM_025151495.1,XM_015288072.1,XM_025151494.1,BGI_novel_T004002,XM_025151496.1,XM_015288066.2	XP_015143552.1|0.0e+00|PREDICTED: ankyrin-3 isoform X1 [Gallus gallus]
112532887	6.133	12.43	1.03608	1.87183e-19	1.50114e-19	ADM2	XM_025153017.1	XP_015708205.1|3.1e-68|PREDICTED: ADM2 [Coturnix japonica]
425462	0.42	0.876	1.03459	3.15533e-06	4.36632e-06	LOC425462	XM_015286720.2,XM_423220.6	XP_423220.3|0.0e+00|PREDICTED: malignant fibrous histiocytoma-amplified sequence 1 homolog isoform X1 [Gallus gallus]
107055275	1.063	2.173	1.03397	1.39024e-09	1.58973e-09	CDK5R1	XM_015299298.2	XP_015154784.1|6.6e-170|PREDICTED: cyclin-dependent kinase 5 activator 1 [Gallus gallus]
417813	3.633	7.403	1.03334	9.98011e-61	4.03296e-61	LRIG3	XM_015281429.2,NM_001199555.1,XM_025147862.1,XM_015281419.2	XP_021240710.1|0.0e+00|leucine-rich repeats and immunoglobulin-like domains protein 3 isoform X1 [Numida meleagris]
421999	19.57	39.876	1.03298	4.03174e-132	9.89769e-133	EPHX2	NM_001033645.1	NP_001028817.1|0.0e+00|bifunctional epoxide hydrolase 2 [Gallus gallus]
430669	6.233	12.676	1.03187	1.55088e-26	1.04967e-26	EFHD2	XM_428222.6	XP_010721245.1|1.2e-120|PREDICTED: EF-hand domain-containing protein D2 [Meleagris gallopavo]
419479	0.783	1.6	1.0309	7.10095e-06	1.00506e-05	AADACL4L3	XM_003642532.4	XP_003642580.3|8.5e-239|PREDICTED: arylacetamide deacetylase-like 4 [Gallus gallus]
422394	2.076	4.473	1.02939	2.73917e-104	7.84052e-105	AFF2	XM_025150468.1,BGI_novel_T002745,XM_025150467.1,XM_025150466.1,XM_025150464.1,XM_025150465.1,XM_015278653.2	XP_013039143.1|0.0e+00|PREDICTED: AF4/FMR2 family member 2 isoform X2 [Anser cygnoides domesticus]
418291	0.57	1.163	1.0292	0.000109488	0.000170785	LRRC23	XM_416514.6,XM_015293907.2	XP_015149393.1|1.4e-178|PREDICTED: leucine-rich repeat-containing protein 23 isoform X1 [Gallus gallus]
107049937	0.51	1.04	1.02776	0.000134261	0.000211131	LOC107049937	XM_025145961.1	XP_014118131.1|5.3e-162|PREDICTED: solute carrier family 2, facilitated glucose transporter member 4, partial [Pseudopodoces humilis]
424581	7.19	14.45	1.02425	6.27131e-38	3.47284e-38	TMEM53	NM_001277580.1,XM_015291003.2,XM_015291002.2,BGI_novel_T004911	NP_001264509.1|1.1e-142|transmembrane protein 53 [Gallus gallus]
107050762	5.42	10.99	1.02331	4.7499e-92	1.47018e-92	LOC107050762	XM_025144465.1	ELK33680.1|5.2e-300|Latent-transforming growth factor beta-binding protein 4 [Myotis davidii]
427225	0.496	1.116	1.02294	3.50323e-06	4.86521e-06	PDCD1LG2	XM_424812.6,XM_015280143.2,XM_004949068.3,XM_004949069.3,XM_004949067.3,BGI_novel_T009425,XM_025145071.1	XP_424812.4|2.7e-187|PREDICTED: programmed cell death 1 ligand 2 isoform X1 [Gallus gallus]
417032	7.606	15.406	1.02254	1.71071e-84	5.60434e-85	SLC8B1	XM_015294863.2,XM_015294864.2,XM_004934499.3,BGI_novel_T006914,BGI_novel_T006913,XM_015294862.2,XM_004934497.3	XP_004934554.1|0.0e+00|PREDICTED: sodium/potassium/calcium exchanger 6, mitochondrial isoform X1 [Gallus gallus]
417199	1.523	3.056	1.02043	5.84362e-13	5.77232e-13	DOLK	BGI_novel_T007129,NM_001277659.1,XM_015279486.2	XP_015134972.1|6.1e-296|PREDICTED: dolichol kinase isoform X1 [Gallus gallus]
420354	0.883	1.79	1.01924	7.07732e-12	7.28814e-12	MTBP	XM_025148146.1	XP_015138561.1|0.0e+00|PREDICTED: mdm2-binding protein [Gallus gallus]
396135	1.533	3.103	1.01805	3.60136e-14	3.39572e-14	MST1	BGI_novel_T005931,NM_205213.1	NP_990544.1|0.0e+00|hepatocyte growth factor-like protein precursor [Gallus gallus]
424286	11.966	23.79	1.01644	0	0	MGAT5	XM_015289924.2,XM_025152308.1,XM_015289923.2	XP_015145409.1|0.0e+00|PREDICTED: alpha-1,6-mannosylglycoprotein 6-beta-N-acetylglucosaminyltransferase A [Gallus gallus]
427908	2.353	4.75	1.0163	8.21762e-35	4.74025e-35	C1QTNF6	XM_004937751.3,XM_004937750.3,BGI_novel_T000306,XM_425481.5	XP_006637666.1|4.1e-16|PREDICTED: otolin-1 [Lepisosteus oculatus]
396160	0.56	1.123	1.01463	1.44594e-05	2.09406e-05	WNT1	XM_015273182.2	XP_015128668.1|4.6e-224|PREDICTED: protein Wnt-1 [Gallus gallus]
107049672	1.63	3.283	1.01395	3.07404e-17	2.62054e-17	LOC107049672	XM_025143513.1,XM_025143512.1	XP_015128913.1|0.0e+00|PREDICTED: LOW QUALITY PROTEIN: protein FAM189B-like [Gallus gallus]
415786	0.28	0.556	1.01244	0.000346175	0.000566393	CES1L1	XM_015292452.2,BGI_novel_T005761	XP_015147938.1|0.0e+00|PREDICTED: fatty acyl-CoA hydrolase precursor, medium chain isoform X1 [Gallus gallus]
424772	1.796	3.5	1.01199	4.93723e-22	3.68956e-22	SLC9A9	XM_015276870.2,XM_025153339.1,XM_015276871.2,BGI_novel_T005223,NM_001031305.2	NP_001026476.1|0.0e+00|sodium/hydrogen exchanger 9 [Gallus gallus]
415821	12.936	25.653	1.01198	1.66241e-148	3.7563e-149	ZDHHC7	XM_025154279.1,BGI_novel_T005798	XP_013050497.1|9.4e-184|PREDICTED: palmitoyltransferase ZDHHC7 isoform X1 [Anser cygnoides domesticus]
420873	7.616	15.296	1.01186	5.16706e-31	3.1943e-31	NRN1	NM_001198731.1	NP_001185660.1|3.4e-78|neuritin precursor [Gallus gallus]
395856	1.06	2.136	1.01109	4.22115e-09	4.93829e-09	FOXC1	NM_205006.1	NP_990337.1|0.0e+00|forkhead box protein C1 [Gallus gallus]
107049862	2.083	4.153	1.01034	5.16337e-09	6.05883e-09	LOC107049862	XM_015273657.2	XP_015129143.1|3.7e-127|PREDICTED: uncharacterized protein LOC107049862 [Gallus gallus]
395828	6.646	13.146	1.00732	2.14687e-84	7.04659e-85	CHRD	XM_015291373.2,XM_015291372.2,NM_204980.2,XM_025153315.1,XM_015291374.2,BGI_novel_T005305	XP_015146860.1|0.0e+00|PREDICTED: chordin isoform X3 [Gallus gallus]
395688	13.056	26.143	1.00643	2.33856e-195	4.3945e-196	PTPN1	XM_015296330.2,XM_025142161.1,XM_025142162.1,NM_204875.1,XM_015296333.2,XM_015296332.2	XP_015151818.1|2.4e-250|PREDICTED: tyrosine-protein phosphatase non-receptor type 1 isoform X3 [Gallus gallus]
426962	89.066	177.623	1.00409	0	0	GFPT2	XM_424573.6,XM_025154916.1,XM_015293945.2	XP_015149431.1|0.0e+00|PREDICTED: glutamine--fructose-6-phosphate aminotransferase [isomerizing] 2 isoform X1 [Gallus gallus]
424486	2.083	3.6	1.00347	6.53754e-21	5.03087e-21	SLC44A3	XM_015290727.2,XM_015290729.2,BGI_novel_T004839,XM_422327.6,XM_004936581.3,XM_015290730.2	XP_015146214.1|0.0e+00|PREDICTED: choline transporter-like protein 3 isoform X3 [Gallus gallus]
422580	31.543	63.053	1.00262	0	0	ANTXR2	XM_015276523.2	XP_015132009.1|1.5e-278|PREDICTED: anthrax toxin receptor 2 [Gallus gallus]
426231	77.766	155.42	1.00243	0	0	NPEPPS	XM_015299474.2	XP_015154960.1|0.0e+00|PREDICTED: puromycin-sensitive aminopeptidase [Gallus gallus]
417557	22.84	45.283	1.00241	0	0	SLC43A2	XM_415803.6,XM_015296034.2,BGI_novel_T007593	XP_010720190.1|1.6e-296|PREDICTED: large neutral amino acids transporter small subunit 4 [Meleagris gallopavo]
770690	2.323	4.65	1.00098	4.82071e-56	2.06629e-56	PODXL2	XM_001234025.5	XP_015730760.1|0.0e+00|PREDICTED: podocalyxin-like protein 2 isoform X1 [Coturnix japonica]
771523	8.03	3.996	-1.00215	2.90083e-28	1.88557e-28	OSR2	NM_001170344.1,XM_015282958.2,XM_015282955.2,XM_015282956.2,BGI_novel_T001804,BGI_novel_T001805,XM_015282957.2,BGI_novel_T001803	KFW81079.1|1.2e-152|Protein odd-skipped-related 2 [Manacus vitellinus]
776014	25.143	12.526	-1.00262	0	0	BAHCC1	BGI_novel_T007415,XM_025141667.1,BGI_novel_T007414	XP_021270552.1|0.0e+00|BAH and coiled-coil domain-containing protein 1 isoform X2 [Numida meleagris]
422380	28.23	14.096	-1.00282	0	0	NRK	NM_001031126.2,BGI_novel_T002729,BGI_novel_T002731,XM_025149574.1,BGI_novel_T002732,BGI_novel_T002730,BGI_novel_T002733,XM_015278302.2,BGI_novel_T002734	XP_015133788.1|0.0e+00|PREDICTED: nik-related protein kinase isoform X1 [Gallus gallus]
427385	2.69	1.34	-1.00323	4.75315e-64	1.84368e-64	DMXL1	XM_015280681.2,BGI_novel_T009630,XM_015280680.2,XM_015280679.2,XM_015280678.2,XM_015280682.2	XP_021237084.1|0.0e+00|dmX-like protein 1 isoform X1 [Numida meleagris]
396331	0.556	0.273	-1.00364	4.36048e-07	5.7127e-07	SEMA4D	XM_015280267.2,BGI_novel_T009506,XM_015280259.2,XM_015280261.2,NM_001293102.1,BGI_novel_T009502,XM_015280265.2,BGI_novel_T009505,XM_015280258.2,BGI_novel_T009504,BGI_novel_T009507,XM_015280262.2,BGI_novel_T009509,XM_015280263.2,XM_015280266.2,BGI_novel_T009501,BGI_novel_T009503,BGI_novel_T009508,XM_015280264.2	XP_015135744.1|0.0e+00|PREDICTED: semaphorin-4D isoform X1 [Gallus gallus]
431604	5.586	2.81	-1.00366	1.39414e-62	5.50909e-63	BNC2	XM_015280204.2,XM_025145272.1,XM_015280200.2,XM_025145270.1,BGI_novel_T009448,XM_015280203.2,XM_015280201.1,XM_015280205.2	XP_015135691.1|0.0e+00|PREDICTED: zinc finger protein basonuclin-2 isoform X4 [Gallus gallus]
395487	4.81	2.316	-1.00387	1.29074e-51	5.83566e-52	MYO6	BGI_novel_T002426,XM_025148523.1,XM_025148520.1,NM_204735.1,XM_025148522.1,XM_025148521.1	XP_015140224.1|0.0e+00|PREDICTED: unconventional myosin-VI isoform X1 [Gallus gallus]
420919	37.856	19.203	-1.00404	0	0	TRIO	BGI_novel_T001568,XM_015282226.2,XM_025147706.1,BGI_novel_T001567	XP_021241104.1|0.0e+00|triple functional domain protein isoform X4 [Numida meleagris]
415462	0.696	0.343	-1.00435	0.000118679	0.000185912	TM6SF1	XM_025153834.1,NM_001277461.1,XM_025153835.1,XM_015291995.2,BGI_novel_T005534	XP_015147481.1|7.5e-196|PREDICTED: transmembrane 6 superfamily member 1 isoform X1 [Gallus gallus]
422806	0.566	0.28	-1.00539	0.000220774	0.000354426	ZCCHC4	XM_420756.6	XP_420756.4|7.7e-310|PREDICTED: zinc finger CCHC domain-containing protein 4 [Gallus gallus]
100859173	7.886	3.913	-1.00642	1.05114e-112	2.86016e-113	LOC100859173	XM_003641130.4,BGI_novel_T002539,XM_015285253.2,XM_015285252.2,XM_015285251.2,XM_025150287.1,BGI_novel_T002540	XP_021262041.1|2.9e-225|probable G-protein coupled receptor 83 [Numida meleagris]
422591	9.34	4.71	-1.00651	1.71479e-140	4.01366e-141	PTPN13	XM_015276503.2,XM_015276502.2,XM_015276501.2,BGI_novel_T002916,XM_015276498.2,XM_015276500.2,XM_015276499.2,XM_015276497.2	XP_021250853.1|0.0e+00|tyrosine-protein phosphatase non-receptor type 13 isoform X6 [Numida meleagris]
112530485	3.206	1.586	-1.00831	2.88668e-09	3.35011e-09	LOC112530485	XM_025144590.1	XP_005030708.2|2.4e-163|ras GTPase-activating protein 1, partial [Anas platyrhynchos]
421002	19.956	9.91	-1.00892	1.74202e-194	3.29162e-195	CARMIL1	BGI_novel_T001621,NM_001159370.2	XP_009562513.1|0.0e+00|PREDICTED: leucine-rich repeat-containing protein 16A [Cuculus canorus]
421564	7.92	3.943	-1.00914	2.29582e-152	5.09685e-153	AFDN	XM_015284350.2,XM_015284347.2,XM_015284360.2,XM_015284356.2,XM_015284349.2,XM_015284357.2,XM_015284344.2,XM_015284355.2,BGI_novel_T002246,XM_015284359.2,BGI_novel_T002245,XM_015284358.2,XM_015284346.2,XM_015284348.2,XM_015284354.2,XM_015284352.2,XM_015284351.2,XM_015284345.2,XM_015284353.2	XP_015139839.1|0.0e+00|PREDICTED: afadin isoform X10 [Gallus gallus]
378792	3.87	1.956	-1.0095	3.85905e-16	3.40526e-16	RHBG	NM_204367.2,XM_015298410.2	XP_015153896.1|2.4e-229|PREDICTED: ammonium transporter Rh type B isoform X1 [Gallus gallus]
424043	39.73	19.663	-1.00967	0	0	GLS	NM_001031248.1,XM_015289390.2,BGI_novel_T004398,XM_015289391.2	XP_015144877.1|0.0e+00|PREDICTED: glutaminase kidney isoform, mitochondrial isoform X2 [Gallus gallus]
423637	49.383	24.45	-1.01005	2.60128e-217	4.461e-218	ANXA11	NM_001012903.3	NP_001012921.2|7.6e-293|annexin A11 [Gallus gallus]
424699	107.463	53.286	-1.01055	0	0	LEPROT	XM_015291028.2,NM_001007958.1	NP_001007959.1|2.4e-69|leptin receptor gene-related protein [Gallus gallus]
416718	3.656	1.736	-1.01057	2.03524e-11	2.13945e-11	SNX5	XM_015283465.2,NM_001006178.1	OXB68383.1|3.5e-212|hypothetical protein ASZ78_015323 [Callipepla squamata]
418432	1.693	0.87	-1.01104	1.5966e-12	1.60566e-12	NSUN3	XM_004938314.3,XM_015297960.2,XM_416643.6	XP_416643.3|6.5e-208|PREDICTED: putative methyltransferase NSUN3 isoform X1 [Gallus gallus]
417833	38.416	19.023	-1.0111	7.58616e-207	1.3609e-207	MSRB3	XM_015281636.2,XM_015281645.2,XM_015281622.2,XM_015281611.2,NM_001199578.1,XM_015281618.2,XM_015281639.2	XP_015137097.1|8.7e-119|PREDICTED: methionine-R-sulfoxide reductase B3 isoform X1 [Gallus gallus]
BGI_novel_G000301	16.54	8.113	-1.01131	1.39078e-18	1.14369e-18	BGI_novel_G000301	BGI_novel_T010091
418939	0.116	0.056	-1.01188	0.000732767	0.00123707	AMER2	XM_004938794.3	XP_004938851.1|0.0e+00|PREDICTED: APC membrane recruitment protein 2 [Gallus gallus]
423206	23.206	11.493	-1.01197	5.12919e-151	1.14191e-151	SPINT1	XM_421130.6,XM_015287143.2,XM_004941613.3	XP_004941670.1|1.0e-310|PREDICTED: kunitz-type protease inhibitor 1 isoform X1 [Gallus gallus]
415388	15.506	7.703	-1.01391	5.68628e-201	1.04489e-201	TJP1	XM_015278976.2,XM_015278977.2,XM_015278975.2,XM_015278981.2,BGI_novel_T005471,XM_015278979.2,XM_015278980.2,BGI_novel_T005472,BGI_novel_T005470	XP_015134466.1|0.0e+00|PREDICTED: tight junction protein ZO-1 isoform X6 [Gallus gallus]
415993	1.783	0.876	-1.01526	4.87278e-13	4.80219e-13	CHDH	XM_414335.6,XM_025154540.1,BGI_novel_T006005	XP_414335.4|0.0e+00|PREDICTED: choline dehydrogenase, mitochondrial isoform X1 [Gallus gallus]
424050	3.88	1.916	-1.01548	7.59277e-109	2.10862e-109	HECW2	XM_015289489.2,XM_015289488.2	XP_015144974.1|0.0e+00|PREDICTED: E3 ubiquitin-protein ligase HECW2 [Gallus gallus]
107056693	1.7	0.836	-1.01784	5.85234e-19	4.75419e-19	LOC107056693	XM_004936638.3,XM_015290645.2,XM_025153259.1	XP_004936695.1|0.0e+00|PREDICTED: volume-regulated anion channel subunit LRRC8B [Gallus gallus]
418225	1.12	0.55	-1.01791	4.52514e-20	3.56221e-20	TTLL1	BGI_novel_T000427,XM_004938021.3,XM_015291324.2,XM_416450.6,XM_015291310.2	XP_004938078.1|8.3e-265|PREDICTED: probable tubulin polyglutamylase TTLL1 isoform X1 [Gallus gallus]
395545	13.083	6.44	-1.01863	2.46264e-48	1.17227e-48	FRZB	NM_204772.2	NP_990103.1|3.9e-186|secreted frizzled-related protein 3 precursor [Gallus gallus]
427263	50.453	24.84	-1.01947	8.34827e-257	1.24772e-257	PSAT1	XM_424846.6	XP_424846.3|9.1e-210|PREDICTED: phosphoserine aminotransferase [Gallus gallus]
416421	5.32	2.623	-1.02016	7.38004e-85	2.40545e-85	MKL2	XM_025155316.1,XM_004945071.3,BGI_novel_T006390,XM_015294270.2,XM_004945072.3,XM_015294275.2,XM_015294271.2,XM_025155315.1,XM_414735.6,XM_004945069.3,XM_015294274.2,XM_015294276.2,BGI_novel_T006389	XP_015149762.1|0.0e+00|PREDICTED: MKL/myocardin-like protein 2 isoform X6 [Gallus gallus]
430729	2.38	1.26	-1.02101	5.09825e-28	3.33193e-28	C26H1orf106	XM_015298790.2,BGI_novel_T008735,BGI_novel_T008736,XM_015298789.2,XM_015298791.2	XP_015154277.1|1.9e-307|PREDICTED: uncharacterized protein C1orf106 homolog isoform X2 [Gallus gallus]
423309	2.386	1.15	-1.02186	2.04269e-07	2.62071e-07	AP4S1	XM_015287638.2,BGI_novel_T003708,XM_421226.6,BGI_novel_T003706,XM_015287637.2,BGI_novel_T003707,XM_015287640.2,XM_015287641.2	XP_015143126.1|6.1e-69|PREDICTED: AP-4 complex subunit sigma-1 isoform X2 [Gallus gallus]
100858938	8.746	4.23	-1.02283	8.53213e-18	7.1475e-18	ARHGDIG	XM_003642163.4,XM_015294615.2	XP_015150101.1|2.1e-174|PREDICTED: rho GDP-dissociation inhibitor 3 isoform X2 [Gallus gallus]
396526	5205.36	2554.92	-1.02293	0	0	ACTB	NM_205518.1	OPJ87354.1|5.5e-221|actin, cytoplasmic 1 [Patagioenas fasciata monilis]
418154	6.546	3.89	-1.02301	3.17018e-30	1.99409e-30	WNT5B	NM_001037269.1,XM_015285801.2	XP_015141287.1|1.2e-232|PREDICTED: protein Wnt-5b isoform X1 [Gallus gallus]
396465	143.896	70.8	-1.02373	0	0	MYH10	BGI_novel_T007299,BGI_novel_T007298,XM_015295127.1,XM_015295126.2,NM_205474.1,XM_015295125.2,XM_015295124.1	NP_990805.1|0.0e+00|myosin-10 [Gallus gallus]
417547	3.216	1.523	-1.0263	2.06971e-18	1.70802e-18	KCTD7	BGI_novel_T007585,NM_001039269.1	NP_001034358.1|1.6e-169|BTB/POZ domain-containing protein KCTD7 [Gallus gallus]
419041	6.143	3.003	-1.0269	7.02227e-23	5.13676e-23	C1H12ORF4	XM_001231609.5	XP_001231610.1|0.0e+00|PREDICTED: protein C12orf4 homolog [Gallus gallus]
416911	0.38	0.186	-1.02702	3.20674e-08	3.93618e-08	MN1	XM_003642206.4	XP_003642254.3|0.0e+00|PREDICTED: LOW QUALITY PROTEIN: probable tumor suppressor protein MN1 [Gallus gallus]
424640	1.15	0.56	-1.02814	1.15198e-07	1.45904e-07	ORC1	NM_001031286.1	XP_015146506.1|0.0e+00|PREDICTED: origin recognition complex subunit 1 isoform X1 [Gallus gallus]
417870	23.256	11.4	-1.02919	9.3039e-262	1.36927e-262	PAWR	XM_015283263.2	XP_015138738.1|3.7e-184|PREDICTED: PRKC apoptosis WT1 regulator protein [Gallus gallus]
426885	52.99	26.046	-1.03049	0	0	HDAC7	XM_025145303.1,XM_025145305.1,XM_025145297.1,XM_025145296.1,XM_015300236.1,XM_025145299.1,NM_001031402.1,XM_025145298.1,BGI_novel_T009719,BGI_novel_T009722,BGI_novel_T009728,XM_025145307.1,XM_025145310.1,BGI_novel_T009721,XM_025145311.1,BGI_novel_T009726,BGI_novel_T009720,BGI_novel_T009723,BGI_novel_T009718,BGI_novel_T009727,BGI_novel_T009725,XM_025145302.1,BGI_novel_T009716,XM_025145301.1,XM_025…	XP_015155723.1|0.0e+00|PREDICTED: histone deacetylase 7 isoform X2 [Gallus gallus]
428731	8.046	3.943	-1.03056	2.28687e-79	7.73907e-80	SLC7A11	XM_426289.5,BGI_novel_T002783,XM_025150077.1	XP_006037039.1|9.6e-184|PREDICTED: cystine/glutamate transporter [Alligator sinensis]
418636	2.713	1.31	-1.03114	1.62832e-09	1.86637e-09	TCEANC	BGI_novel_T000770,BGI_novel_T000769,XM_015273603.2,XM_416834.5,BGI_novel_T000771,XM_015273607.2,XM_015273601.1,XM_015273596.1	XP_416834.1|2.6e-208|PREDICTED: transcription elongation factor A N-terminal and central domain-containing protein [Gallus gallus]
419497	0.206	0.08	-1.03114	0.000471799	0.000781837	DISP3	XM_015296924.2,XM_015296921.2,XM_015296928.2,XM_015296926.2,XM_015296927.2,NM_001199176.1,XM_015296922.2,XM_015296920.2,XM_015296925.2	XP_015152406.1|0.0e+00|PREDICTED: patched domain-containing protein 2 isoform X1 [Gallus gallus]
418136	3.563	1.666	-1.03184	1.06365e-40	5.62926e-41	KIAA1551	XM_015287164.1,XM_416367.6,BGI_novel_T000356,XM_015287145.2,XM_015287153.2,BGI_novel_T000357	XP_416367.3|0.0e+00|PREDICTED: uncharacterized protein KIAA1551 homolog isoform X1 [Gallus gallus]
396548	1247.69	619.016	-1.03264	0	0	COL6A3	XM_015289147.2,BGI_novel_T004342,BGI_novel_T004343,BGI_novel_T004344,XM_015289149.2,XM_015289143.2,XM_015289151.2,BGI_novel_T004345,NM_205534.2,XM_015289145.2,XM_015289150.2,XM_015289153.2,XM_015289152.2,XM_015289155.2,XM_015289144.2,XM_015289148.2,XM_015289146.2,XM_015289154.2	XP_015144640.1|0.0e+00|PREDICTED: collagen alpha-3(VI) chain isoform X12 [Gallus gallus]
422614	5.11	2.523	-1.03299	1.0474e-60	4.2347e-61	PPM1K	BGI_novel_T002931,XM_420574.6	OXB84084.1|5.3e-223|hypothetical protein H355_012202, partial [Colinus virginianus]
423770	3.863	1.88	-1.03299	3.28122e-31	2.01483e-31	43532	XM_025151577.1,XM_015288382.2,NM_001286368.1,XM_015288384.2,XM_015288379.2,XM_025151583.1,XM_025151581.1,XM_025151584.1,XM_025151578.1,XM_015288380.2,NM_001286369.1,XM_015288381.2,XM_025151579.1,XM_025151582.1,XM_025151580.1	XP_015143869.1|0.0e+00|PREDICTED: E3 ubiquitin-protein ligase MARCH8 isoform X2 [Gallus gallus]
420533	35.87	17.503	-1.0337	3.677e-182	7.22301e-183	CROT	XM_003640663.4,XM_418635.6,XM_004939264.3	XP_021243186.1|0.0e+00|peroxisomal carnitine O-octanoyltransferase isoform X1 [Numida meleagris]
423439	7	3.17	-1.03424	2.63557e-213	4.62391e-214	SYNE3	BGI_novel_T003780,XM_025151393.1,BGI_novel_T003775,XM_025151395.1,XM_025151396.1,XM_025151404.1,XM_025151399.1,BGI_novel_T003776,BGI_novel_T003781,XM_025151402.1,BGI_novel_T003778,XM_025151394.1,BGI_novel_T003779,BGI_novel_T003783,XM_004941905.3,BGI_novel_T003777,XM_025151398.1,XM_004941903.3,XM_025151392.1,XM_025151400.1,XM_025151403.1,BGI_novel_T003782,XM_025151401.1,XM_421348.6,XM_025151397.1	XP_004941960.1|0.0e+00|PREDICTED: nesprin-3 [Gallus gallus]
378919	22.543	10.986	-1.03474	4.41019e-136	1.05517e-136	TRIB2	NM_204401.2	NP_989732.2|2.2e-199|tribbles homolog 2 [Gallus gallus]
770488	50.196	24.483	-1.03514	0	0	PDGFRB	XM_025155041.1	XP_015149412.1|0.0e+00|PREDICTED: platelet-derived growth factor receptor beta isoform X1 [Gallus gallus]
421878	2.953	1.433	-1.03569	9.18427e-20	7.29289e-20	PRIM2	XM_015284827.2,NM_001012880.1	NP_001012898.1|1.4e-296|DNA primase large subunit [Gallus gallus]
106182184	0.85	0.413	-1.03675	4.53878e-05	6.82039e-05	DMB1	BGI_novel_T007034,BGI_novel_T007035,XM_015294945.2,NM_001312902.1	NP_001299831.1|1.6e-186|MHC class II M beta chain 1 [Gallus gallus]
426534	4.166	2.026	-1.03707	8.17091e-19	6.67166e-19	AK3	XM_025144780.1,BGI_novel_T009423,XM_015280190.2,BGI_novel_T009424,XM_025144779.1	XP_015135677.1|1.0e-116|PREDICTED: GTP:AMP phosphotransferase AK3, mitochondrial isoform X2 [Gallus gallus]
420249	1.776	0.866	-1.0382	2.17809e-13	2.11438e-13	SPAG1	XM_025148061.1	XP_015138450.1|0.0e+00|PREDICTED: sperm-associated antigen 1 isoform X1 [Gallus gallus]
769322	6.72	3.266	-1.03977	1.86493e-61	7.44703e-62	STARD4	BGI_novel_T009529,NM_001079742.1,XM_015280436.1	NP_001073210.1|7.2e-95|stAR-related lipid transfer protein 4 [Gallus gallus]
417089	0.53	0.203	-1.03998	5.7689e-12	5.91197e-12	RALGPS1	XM_025141449.1,BGI_novel_T007274,XM_015279862.2,BGI_novel_T007275,XM_015279857.2,XM_015279858.2,BGI_novel_T007269,XM_015279855.2,XM_025141446.1,XM_025141448.1,BGI_novel_T007272,BGI_novel_T007273,XM_025141445.1,BGI_novel_T007270,XM_015279859.2,XM_003642301.4,XM_015279856.2,XM_015279854.2,XM_015279860.2,BGI_novel_T007271	XP_015135340.1|0.0e+00|PREDICTED: ras-specific guanine nucleotide-releasing factor RalGPS1 isoform X1 [Gallus gallus]
770629	1.85	0.826	-1.04178	1.33687e-38	7.31978e-39	RANBP3L	XM_015277517.2,XM_015277518.2,BGI_novel_T009325,BGI_novel_T009326	XP_015133004.1|4.6e-294|PREDICTED: ran-binding protein 3-like isoform X2 [Gallus gallus]
769203	192.033	92.98	-1.04181	0	0	PYCR1	NM_001292071.1	NP_001279000.1|2.9e-173|pyrroline-5-carboxylate reductase 2 [Gallus gallus]
768904	7.996	3.873	-1.04242	2.4266e-67	9.1249e-68	DPT	XM_001231675.5	XP_001231676.3|5.8e-123|PREDICTED: dermatopontin [Gallus gallus]
416260	6.83	3.313	-1.0427	7.89112e-102	2.29974e-102	GALNT10	BGI_novel_T006281,XM_025154881.1	XP_004944993.1|0.0e+00|PREDICTED: polypeptide N-acetylgalactosaminyltransferase 10 [Gallus gallus]
373991	9.58	4.446	-1.04285	1.88655e-146	4.29804e-147	CLOCK	NM_204174.3,NM_001289834.1,BGI_novel_T003068,XM_015285393.2,XM_015285396.2,XM_015285398.2,XM_015285400.2,BGI_novel_T003069,XM_015285399.2,XM_025149457.1,XM_015285394.2,XM_015285392.2	XP_015140878.1|0.0e+00|PREDICTED: circadian locomoter output cycles protein kaput isoform X1 [Gallus gallus]
424998	2.59	1.25	-1.04293	4.01648e-53	1.78336e-53	MEGF6L	BGI_novel_T005348,XM_025153575.1,XM_025153569.1,XM_025153570.1,XM_025153568.1,XM_025153577.1,XM_025153584.1,XM_025153564.1,XM_025153581.1,XM_025153582.1,XM_025153567.1,XM_025153571.1,XM_025153573.1,XM_025153580.1,XM_025153574.1,XM_015291737.2,XM_025153579.1,XM_025153578.1,XM_025153565.1,XM_025153583.1,XM_015291748.2,XM_025153572.1	XP_015147219.1|0.0e+00|PREDICTED: multiple epidermal growth factor-like domains protein 6 isoform X1 [Gallus gallus]
427467	4.853	2.24	-1.04323	2.19266e-68	8.16774e-69	CZH9ORF3	XM_004949225.3,BGI_novel_T009482,XM_025145255.1,XM_025145256.1,XM_025145257.1,XM_025145254.1,XM_004949224.3	XP_004949281.1|0.0e+00|PREDICTED: aminopeptidase O isoform X1 [Gallus gallus]
771739	18.733	9.05	-1.04432	2.25705e-174	4.55567e-175	FMNL2	XM_015290213.2,XM_015290211.2,XM_015290212.2,XM_015290210.2	XP_015145696.1|0.0e+00|PREDICTED: formin-like protein 2 isoform X1 [Gallus gallus]
112530490	0.223	0.106	-1.04494	0.000262801	0.000424791	LOC112530490	XM_025144597.1	XP_015137850.1|3.7e-283|PREDICTED: endogenous retrovirus group K member 18 Pol protein-like [Gallus gallus]
396414	128.72	62.366	-1.0462	0	0	RRBP1	XM_015283455.2,XM_025148587.1,BGI_novel_T002055,NM_001257346.1,XM_015283452.2	NP_001244275.1|0.0e+00|ribosome-binding protein 1 [Gallus gallus]
419752	38.856	18.313	-1.04624	0	0	ARHGEF12	BGI_novel_T008488,XM_015298183.2,XM_417890.6,BGI_novel_T008489,BGI_novel_T008487	XP_417890.4|0.0e+00|PREDICTED: rho guanine nucleotide exchange factor 12 isoform X1 [Gallus gallus]
423162	1.963	0.946	-1.04796	1.6178e-29	1.02838e-29	PRR5L	XM_015287209.2,BGI_novel_T003522,XM_003641383.4,XM_004941549.3	XP_003641431.1|2.2e-204|PREDICTED: proline-rich protein 5-like [Gallus gallus]
418210	12.766	6.143	-1.04858	5.79501e-172	1.18052e-172	RASSF8	XM_416437.6,XM_025142102.1,XM_015291496.2	XP_416437.2|6.1e-236|PREDICTED: ras association domain-containing protein 8 [Gallus gallus]
419316	2.936	1.42	-1.04979	7.27739e-25	5.10402e-25	APCDD1L	XM_015296543.2	XP_015152029.1|8.1e-300|PREDICTED: protein APCDD1-like [Gallus gallus]
429054	3.226	1.553	-1.05247	4.14148e-20	3.25588e-20	LOC429054	XM_015290337.1	XP_015145823.1|1.2e-122|PREDICTED: protein FAM102B-like [Gallus gallus]
416285	3.72	1.686	-1.05398	3.89628e-43	1.99888e-43	MGAT4B	XM_015293929.2,XM_015293931.2,BGI_novel_T006297,XM_025154918.1,XM_015293930.2,XM_025154919.1	XP_015149415.1|0.0e+00|PREDICTED: alpha-1,3-mannosyl-glycoprotein 4-beta-N-acetylglucosaminyltransferase B isoform X1 [Gallus gallus]
428372	11.076	5.31	-1.05444	6.94917e-90	2.18556e-90	PDP1	NM_001199910.1,XM_015282931.2,XM_015282932.2	NP_001186839.1|0.0e+00|pyruvate dehyrogenase phosphatase catalytic subunit 1 [Gallus gallus]
420842	4.62	2.23	-1.05532	2.16971e-17	1.8406e-17	GMPR	XM_015275876.2,NM_001030998.1	NP_001026169.1|8.2e-196|GMP reductase 1 [Gallus gallus]
418612	5.836	2.796	-1.05593	3.27021e-67	1.23108e-67	PHKA2	XM_416811.6,XM_004934687.3,XM_015272814.2	XP_004934744.1|0.0e+00|PREDICTED: phosphorylase b kinase regulatory subunit alpha, liver isoform isoform X1 [Gallus gallus]
415833	25.913	12.446	-1.057	2.58239e-220	4.36956e-221	CA5A	XM_414195.6,XM_004944283.3	XP_004944340.1|2.8e-189|PREDICTED: carbonic anhydrase 5A, mitochondrial isoform X1 [Gallus gallus]
768612	5.286	2.45	-1.05886	1.11004e-11	1.15164e-11	TCF4Z	XM_015277384.2,XM_015277385.2,XM_015277380.2,XM_015277381.2,XM_015277382.2,BGI_novel_T009268,XM_015277383.2	XP_015132869.1|1.3e-169|PREDICTED: transcription factor 4 isoform X3 [Gallus gallus]
418613	0.526	0.256	-1.05903	1.7291e-07	2.20976e-07	SCML2	XM_004934692.3,XM_025146584.1,XM_025146586.1,XM_025146583.1,XM_025146585.1,XM_025146588.1,XM_025146589.1,XM_025146587.1,XM_004934691.3,XM_025146590.1	XP_004934750.1|0.0e+00|PREDICTED: sex comb on midleg-like protein 2 isoform X3 [Gallus gallus]
771776	0.426	0.206	-1.06071	3.46946e-06	4.81399e-06	REEP1	XM_015285981.2	XP_015141467.1|1.4e-161|PREDICTED: receptor expression-enhancing protein 1 isoform X3 [Gallus gallus]
374090	35.693	17.26	-1.06079	0	0	SEMA3C	XM_015300792.2,BGI_novel_T000081,NM_204243.1	XP_015156278.1|0.0e+00|PREDICTED: semaphorin-3C isoform X1 [Gallus gallus]
723789	31.4	15.553	-1.06109	1.35657e-291	1.82166e-292	DACT1	NM_001044692.1,BGI_novel_T003872	NP_001038157.1|0.0e+00|dapper homolog 1 [Gallus gallus]
427231	4.183	1.996	-1.06274	2.03759e-36	1.15461e-36	KDM4C	XM_003642992.4,XM_025144835.1,XM_004949080.3,BGI_novel_T009440,BGI_novel_T009439,XM_015280207.2,XM_015280209.2	XP_003643040.1|0.0e+00|PREDICTED: lysine-specific demethylase 4C isoform X1 [Gallus gallus]
424192	15.986	7.316	-1.06302	4.60586e-239	7.28597e-240	LY75	NM_001037836.1,BGI_novel_T004525,BGI_novel_T004523,BGI_novel_T004524	NP_001032925.1|0.0e+00|lymphocyte antigen 75 precursor [Gallus gallus]
421229	16.476	7.86	-1.06312	3.59646e-81	1.20513e-81	FBLN7	NM_001326496.1	NP_001313425.1|1.7e-271|fibulin 7 precursor [Gallus gallus]
422166	12.563	5.99	-1.0638	1.74142e-39	9.38636e-40	EDA2R	NM_001083360.1	NP_001076829.1|1.3e-296|tumor necrosis factor receptor superfamily member 27 [Gallus gallus]
374182	15.626	7.47	-1.06404	1.23562e-206	2.22174e-207	ROCK2	XM_015276085.2,XM_025149412.1,XM_015276086.2,XM_015276087.2	XP_009093535.1|0.0e+00|PREDICTED: rho-associated protein kinase 2 isoform X3 [Serinus canaria]
422452	3.656	1.796	-1.06514	4.58171e-42	2.37719e-42	TBC1D9	BGI_novel_T002788,XM_015276688.2,XM_015276687.2,XM_004940948.3	XP_004941005.1|0.0e+00|PREDICTED: TBC1 domain family member 9 isoform X1 [Gallus gallus]
420758	4.023	1.953	-1.06524	1.27015e-64	4.91088e-65	GOLGA4	BGI_novel_T001447,XM_015281659.2,XM_015281656.2,XM_015281660.2,XM_015281657.2,XM_015281658.2,BGI_novel_T001446	XP_010711364.1|0.0e+00|PREDICTED: LOW QUALITY PROTEIN: golgin subfamily A member 4 [Meleagris gallopavo]
422734	1.71	0.82	-1.06535	6.06994e-32	3.67677e-32	ZDHHC2	XM_420689.6	XP_015717828.1|2.4e-232|PREDICTED: palmitoyltransferase ZDHHC2 isoform X1 [Coturnix japonica]
422487	1.57	0.706	-1.06568	8.2166e-29	5.27597e-29	SH2D4A	XM_420452.6,BGI_novel_T002832	XP_420452.1|1.9e-262|PREDICTED: SH2 domain-containing protein 4A [Gallus gallus]
420388	8.1	3.866	-1.06678	2.03435e-109	5.62853e-110	NKTR	XM_004939074.3,XM_025148246.1,XM_025148245.1,XM_004939076.3,XM_418494.6,BGI_novel_T001170,XM_004939075.3,XM_015281146.2,BGI_novel_T001171,XM_015281144.2,XM_004939078.3	XP_017199164.1|1.1e-81|PREDICTED: NK-tumor recognition protein isoform X6 [Oryctolagus cuniculus]
424228	21.686	10.303	-1.06747	5.89126e-270	8.37638e-271	BIN1	XM_015289813.2,XM_015289806.2,XM_025152200.1,XM_015289810.2,XM_015289814.2,XM_015289816.2,XM_015289809.2,XM_015289805.2,XM_015289807.2,XM_015289818.2,XM_015289808.2,XM_015289804.2,NM_001006524.2,XM_015289815.2,XM_015289803.2,XM_015289817.2,XM_015289812.2,XM_015289811.2,XM_015289819.2,XM_015289802.2	XP_015145288.1|0.0e+00|PREDICTED: myc box-dependent-interacting protein 1 isoform X1 [Gallus gallus]
424770	2.976	1.42	-1.06903	4.40553e-25	3.07518e-25	GPC1	NM_001305060.2	XP_021252871.1|0.0e+00|glypican-1 isoform X1 [Numida meleagris]
419955	1.68	0.806	-1.06947	3.44907e-05	5.12625e-05	LIMD2	XM_015299318.2,XM_015299317.2,NM_001006330.2,XM_015299320.2,XM_015299316.2,XM_015299321.2,XM_025143969.1	XP_021233473.1|8.8e-54|LIM domain-containing protein 2 [Numida meleagris]
768787	64.26	30.593	-1.06952	0	0	C3H1ORF198	XM_015284384.2	XP_015139870.1|5.8e-190|PREDICTED: uncharacterized protein C1orf198 homolog [Gallus gallus]
424170	1.806	0.746	-1.0703	8.51637e-16	7.60697e-16	ABCB11	XM_025152623.1,XM_004942758.3,XM_015289675.2,XM_015289673.2,XM_025152622.1,XM_003641637.4,XM_015289676.2,XM_004942757.3	XP_015145159.1|0.0e+00|PREDICTED: bile salt export pump isoform X1 [Gallus gallus]
423216	0.266	0.13	-1.07038	2.23892e-06	3.06515e-06	LTK	XM_004941624.3	XP_004941681.1|0.0e+00|PREDICTED: leukocyte tyrosine kinase receptor [Gallus gallus]
395080	14.856	7.036	-1.07083	1.82433e-48	8.65768e-49	NT5C3A	XM_015281273.2,XM_015281270.2,BGI_novel_T001444,XM_015281269.2,XM_015281271.2,XM_015281267.2,XM_015281268.2,XM_025147008.1,NM_204436.2	XP_015136757.1|1.0e-160|PREDICTED: cytosolic 5'-nucleotidase 3A isoform X3 [Gallus gallus]
427496	81.296	38.696	-1.07176	0	0	CCPG1	XM_025153869.1,XM_025153868.1,BGI_novel_T005484,XM_025153867.1,NM_001031455.1,XM_015291885.2	XP_015147371.1|0.0e+00|PREDICTED: cell cycle progression protein 1 isoform X1 [Gallus gallus]
448833	1.17	0.65	-1.07178	9.41078e-05	0.000145895	BTC	XM_015276319.2,XM_015276318.2,BGI_novel_T002850,NM_001004769.1,BGI_novel_T002849,XM_015276320.2	XP_015716730.1|5.7e-116|PREDICTED: probetacellulin [Coturnix japonica]
428528	18.083	8.53	-1.07235	1.15706e-268	1.65717e-269	DSG4	BGI_novel_T001710,BGI_novel_T001707,XM_015282599.2,BGI_novel_T001708,BGI_novel_T001709	XP_010285911.1|0.0e+00|PREDICTED: desmoglein-1-like [Phaethon lepturus]
422428	76.063	35.65	-1.07314	0	0	PALLD	XM_025149832.1,XM_025149828.1,BGI_novel_T002775,XM_025149829.1,XM_025149827.1,XM_025149830.1,XM_015285389.2	XP_015140874.1|0.0e+00|PREDICTED: palladin isoform X1 [Gallus gallus]
374062	44.583	21.113	-1.07476	3.58616e-205	6.47056e-206	FZD1	NM_001030337.1	NP_001025508.1|0.0e+00|frizzled-1 precursor [Gallus gallus]
422780	5.243	2.476	-1.07483	2.77187e-62	1.09879e-62	LIMCH1	BGI_novel_T003092,XM_015285468.2,XM_015285469.2,XM_025149839.1,BGI_novel_T003091,XM_025149841.1,XM_015285463.2,XM_015285465.1,XM_015285462.2,XM_015285464.1,XM_015285466.2,XM_025149840.1,XM_004936081.2,XM_015285467.1	XP_015140953.1|0.0e+00|PREDICTED: LIM and calponin homology domains-containing protein 1 isoform X7 [Gallus gallus]
100858906	1.566	0.77	-1.07514	1.30658e-08	1.5655e-08	PCBP3	BGI_novel_T004362,XM_025152414.1,XM_004942527.3,XM_004942530.3,XM_004942536.3,XM_004942518.3,BGI_novel_T004369,XM_004942525.3,BGI_novel_T004374,XM_004942521.3,BGI_novel_T004365,XM_025152412.1,BGI_novel_T004373,XM_004942531.3,XM_025152417.1,BGI_novel_T004380,BGI_novel_T004379,BGI_novel_T004377,XM_004942539.3,BGI_novel_T004372,BGI_novel_T004360,BGI_novel_T004367,XM_004942537.3,XM_025152413.1,BGI_no…	XP_021131493.1|1.5e-157|poly(rC)-binding protein 3 isoform X24 [Anas platyrhynchos]
423632	17.236	8.15	-1.0759	1.34142e-139	3.15091e-140	CSGALNACT2	BGI_novel_T003960,XM_015288048.2	XP_421516.2|0.0e+00|PREDICTED: chondroitin sulfate N-acetylgalactosaminyltransferase 2 [Gallus gallus]
386583	2701.18	1277.44	-1.07697	0	0	MMP2	NM_204420.2,BGI_novel_T005708	NP_989751.1|0.0e+00|72 kDa type IV collagenase preproprotein [Gallus gallus]
426869	6.083	2.91	-1.07743	2.20562e-128	5.52471e-129	SCN8A	XM_424477.5,BGI_novel_T009670,BGI_novel_T009668,XM_003643112.4,XM_015300258.2,XM_015300257.2,BGI_novel_T009671,XM_015300259.2,BGI_novel_T009669	XP_010564835.1|0.0e+00|PREDICTED: sodium channel protein type 8 subunit alpha [Haliaeetus leucocephalus]
395879	1.573	0.723	-1.0788	4.05444e-08	4.99779e-08	SPI1	NM_205023.1,BGI_novel_T003559,XM_015286975.2,BGI_novel_T003560,XM_025150593.1	XP_005030065.1|2.3e-103|transcription factor PU.1 isoform X1 [Anas platyrhynchos]
423369	30.593	14.47	-1.07964	0	0	VASH1	XM_015287715.2	XP_015143201.1|3.3e-204|PREDICTED: vasohibin-1 [Gallus gallus]
421574	2.88	1.416	-1.07966	1.44707e-48	6.84628e-49	PDE10A	XM_015284335.2,XM_025149418.1,XM_004935554.3,XM_004935552.3,XM_025149419.1,XM_025149420.1,XM_004935551.3	XP_004935608.1|0.0e+00|PREDICTED: cAMP and cAMP-inhibited cGMP 3',5'-cyclic phosphodiesterase 10A isoform X1 [Gallus gallus]
374189	92.6	43.646	-1.08005	0	0	ME1	NM_204303.1	XP_017933559.1|2.8e-311|PREDICTED: NADP-dependent malic enzyme [Manacus vitellinus]
422149	3.156	1.496	-1.08041	1.17674e-18	9.6572e-19	LPAR4	XM_015278221.2,XM_025149545.1,NM_001278049.1,BGI_novel_T002563,XM_015278219.2	NP_001264978.1|5.2e-199|lysophosphatidic acid receptor 4 [Gallus gallus]
414849	298.373	142.986	-1.08074	0	0	CDH13	NM_001001760.1,XM_015292523.2,XM_015292521.2,XM_015292522.2,XM_015292524.2	XP_015148010.1|0.0e+00|PREDICTED: cadherin-13 isoform X4 [Gallus gallus]
421221	1.586	0.75	-1.08108	1.86661e-11	1.95869e-11	CHAC2	NM_001031032.3	NP_001026203.2|4.3e-104|putative glutathione-specific gamma-glutamylcyclotransferase 2 [Gallus gallus]
418053	6.116	4.056	-1.08349	7.39798e-58	3.10947e-58	IFT27	NM_001277381.2,XM_015285377.2,XM_025148675.1,NM_001277380.1	NP_001264309.1|3.0e-111|intraflagellar transport protein 27 homolog isoform 1 [Gallus gallus]
419345	3.26	1.536	-1.085	5.73025e-52	2.57884e-52	ATP9A	XM_015296519.2,BGI_novel_T007925,XM_025142313.1,XM_015296518.2	XP_015152004.1|0.0e+00|PREDICTED: probable phospholipid-transporting ATPase IIA isoform X1 [Gallus gallus]
395153	3.13	1.446	-1.08518	6.62648e-38	3.67089e-38	PTPRU	NM_204492.1,BGI_novel_T008315	OPJ71854.1|0.0e+00|receptor-type tyrosine-protein phosphatase U [Patagioenas fasciata monilis]
423878	13.216	6.25	-1.08583	8.24731e-241	1.29606e-241	SLK	XM_004942266.3,XM_015288717.2,BGI_novel_T004203,XM_004942265.3,XM_421743.6	XP_421743.3|0.0e+00|PREDICTED: STE20-like serine/threonine-protein kinase isoform X2 [Gallus gallus]
420667	1.823	0.86	-1.08646	6.24016e-22	4.68009e-22	CMTM6	XM_025148025.1	XP_418766.4|1.9e-110|PREDICTED: CKLF-like MARVEL transmembrane domain-containing protein 6 [Gallus gallus]
427790	1.856	0.886	-1.0885	5.23195e-17	4.49491e-17	MYOCD	XM_015295167.2,NM_001080715.1,XM_015295173.2,XM_025141617.1,XM_015295168.2,XM_015295171.2,XM_015295170.2,XM_015295169.1,XM_015295172.1	XP_015150653.1|0.0e+00|PREDICTED: myocardin isoform X1 [Gallus gallus]
431583	11.16	5.243	-1.0887	2.41092e-178	4.78105e-179	ERBIN	XM_015277608.2,XM_015277610.2,BGI_novel_T009382,BGI_novel_T009383,BGI_novel_T009381,XM_015277607.2,XM_015277606.2,XM_015277611.2,XM_015277609.2,XM_025144777.1	XP_004937348.1|0.0e+00|PREDICTED: protein LAP2 isoform X1 [Gallus gallus]
431602	2.236	1.04	-1.09007	3.32262e-58	1.38894e-58	PTPRD	XM_025145227.1,XM_025145223.1,XM_015280165.2,XM_025145218.1,XM_025145222.1,BGI_novel_T009443,XM_015280152.2,XM_025145229.1,XM_015280180.2,XM_025145220.1,XM_015280154.2,XM_025145219.1,XM_015280178.2,XM_015280179.2,XM_025145221.1,XM_025145217.1,XM_015280169.2,XM_025145231.1,XM_025145224.1,XM_015280167.2,XM_025145228.1,XM_015280182.2,XM_015280175.2,XM_025145230.1,XM_025145226.1,XM_015280168.2,XM_015…	XP_015135663.1|0.0e+00|PREDICTED: receptor-type tyrosine-protein phosphatase delta isoform X25 [Gallus gallus]
423984	10.753	5.046	-1.09107	1.14454e-110	3.14761e-111	SLC40A1	XM_015289163.2,NM_001012913.1	NP_001012931.1|0.0e+00|solute carrier family 40 member 1 [Gallus gallus]
430723	0.193	0.093	-1.09151	1.06589e-06	1.42977e-06	BSN	XM_025154571.1,XM_025154573.1,XM_025154572.1	XP_015148373.1|0.0e+00|PREDICTED: protein bassoon isoform X2 [Gallus gallus]
422173	150.39	70.443	-1.09259	0	0	MSN	NM_001031112.1,BGI_novel_T002535	NP_001026283.1|3.4e-132|uncharacterized protein LOC422173 [Gallus gallus]
395087	3.796	1.866	-1.09386	2.88901e-25	2.0064e-25	TSPAN32	BGI_novel_T003448,BGI_novel_T003446,XM_015286683.2,BGI_novel_T003447,XM_004941440.3	XP_004941497.1|1.5e-132|PREDICTED: tetraspanin-32 isoform X1 [Gallus gallus]
428323	0.976	0.466	-1.094	5.18364e-07	6.82288e-07	C19orf35	BGI_novel_T009060,XM_425883.6,XM_004948764.3	XP_004948821.1|0.0e+00|PREDICTED: putative uncharacterized protein C19orf35 homolog isoform X1 [Gallus gallus]
BGI_novel_G000023	5.97	2.76	-1.097	1.0005e-11	1.03633e-11	BGI_novel_G000023	BGI_novel_T000661
769757	1.54	0.62	-1.09786	1.40749e-06	1.90291e-06	MPP4	XM_001233046.4,BGI_novel_T004441	XP_001233047.2|0.0e+00|PREDICTED: MAGUK p55 subfamily member 4 isoform X1 [Gallus gallus]
395574	0.643	0.303	-1.09911	2.90678e-07	3.75832e-07	PAX2	XM_015288365.2,BGI_novel_T004097,NM_204793.1,BGI_novel_T004104,XM_025151478.1,XM_025151472.1,BGI_novel_T004105,BGI_novel_T004098,BGI_novel_T004103,XM_025151477.1,XM_025151473.1,XM_025151475.1,XM_025151480.1,XM_025151474.1,XM_025151481.1,BGI_novel_T004108,XM_025151476.1,XM_015288364.2,XM_025151471.1,XM_015288366.2,BGI_novel_T004101,XM_015288368.2,BGI_novel_T004100,BGI_novel_T004106,BGI_novel_T0041…	XP_015143847.1|5.4e-285|PREDICTED: paired box protein Pax-2 isoform X5 [Gallus gallus]
418197	8.993	4.07	-1.0997	1.46434e-100	4.28888e-101	C2CD5	XM_015291638.2,BGI_novel_T000405,XM_015291670.2,XM_015291625.2,XM_025142013.1,XM_015291650.2,XM_025142015.1,BGI_novel_T000404,XM_025142022.1,XM_015291624.2,XM_015291690.2,XM_025142009.1,XM_015291720.2,XM_025142027.1,XM_015291710.2,XM_015291647.2,XM_015291657.2,XM_015291664.2,XM_025142003.1,XM_004937985.3,XM_015291685.2,XM_015291675.2,XM_015291702.2	XP_015147188.1|0.0e+00|PREDICTED: C2 domain-containing protein 5 isoform X16 [Gallus gallus]
421057	6.346	2.956	-1.10254	1.32826e-91	4.12226e-92	SMCHD1	XM_015277951.2,XM_015277952.2	XP_015133438.1|0.0e+00|PREDICTED: structural maintenance of chromosomes flexible hinge domain-containing protein 1 isoform X2 [Gallus gallus]
427546	21.603	10.04	-1.10335	5.71238e-110	1.57691e-110	PLEKHF1	XM_004944209.3,XM_004944207.3,XM_004944210.3,XM_004944208.3,XM_015292426.2,XM_015292427.2	XP_004944264.1|1.3e-159|PREDICTED: pleckstrin homology domain-containing family F member 1 [Gallus gallus]
404746	2.023	0.953	-1.10517	1.10179e-37	6.12422e-38	ST6GALNAC3	XM_025153111.1,BGI_novel_T004898	XP_015146325.1|1.6e-177|PREDICTED: alpha-N-acetylgalactosaminide alpha-2,6-sialyltransferase 3 [Gallus gallus]
423649	0.683	0.316	-1.1066	9.02688e-07	1.20579e-06	LRRTM3	NM_001199545.1,XM_015288097.1	XP_015143583.1|0.0e+00|PREDICTED: leucine-rich repeat transmembrane neuronal protein 3 isoform X1 [Gallus gallus]
427097	2.683	1.283	-1.10765	6.05158e-15	5.54123e-15	FAM105B	XM_025147699.1,XM_025147697.1,XM_015282230.2,XM_004935105.3,XM_025147704.1,XM_025147700.1,XM_015282228.2,BGI_novel_T001563,XM_015282239.2,XM_025147702.1,BGI_novel_T001564,XM_004935104.3,XM_015282238.2,XM_025147698.1,XM_025147701.1,XM_015282229.2,XM_025147705.1,XM_025147703.1	XP_004935161.2|1.1e-158|PREDICTED: ubiquitin thioesterase otulin isoform X1 [Gallus gallus]
423988	50.743	23.503	-1.10855	0	0	GULP1	BGI_novel_T004300,XM_004942412.3,XM_004942416.3,XM_004942414.3,XM_421848.6,XM_025152274.1,XM_004942415.3	XP_015723327.1|1.8e-220|PREDICTED: PTB domain-containing engulfment adapter protein 1 isoform X2 [Coturnix japonica]
424447	10.63	5.153	-1.10916	3.31795e-135	7.97296e-136	COLGALT2	BGI_novel_T004790,XM_015290549.2,BGI_novel_T004789,XM_422290.4	XP_009907440.1|0.0e+00|PREDICTED: procollagen galactosyltransferase 2 [Picoides pubescens]
395484	1.03	0.473	-1.11026	2.45864e-12	2.48997e-12	OTOR	NM_204732.1,XM_025148519.1,BGI_novel_T001978	NP_990063.1|7.0e-71|otoraplin precursor [Gallus gallus]
420883	80.206	36.936	-1.11065	9.06963e-269	1.29709e-269	TUBB2B	NM_001004400.2	XP_015507719.1|2.5e-263|PREDICTED: tubulin beta-1 chain-like [Parus major]
420885	1.886	1.343	-1.11265	5.28033e-18	4.40037e-18	BPHL	XM_015276019.2,XM_025147673.1,XM_015276018.2,XM_025147675.1,XM_025147674.1	XP_015131504.1|3.7e-164|PREDICTED: valacyclovir hydrolase isoform X3 [Gallus gallus]
770954	0.696	0.326	-1.1136	1.18916e-06	1.60155e-06	KCNK2	XM_001234269.4,XM_004935320.3	XP_004935377.1|2.5e-239|PREDICTED: potassium channel subfamily K member 2 isoform X1 [Gallus gallus]
395904	7.35	3.39	-1.11386	5.47323e-235	8.76045e-236	ZFHX4	XM_004939917.3,BGI_novel_T001761,XM_015282869.2,XM_015282868.2,XM_425925.6,XM_004939918.3,XM_004939919.3	XP_004939976.1|0.0e+00|PREDICTED: zinc finger homeobox protein 4 isoform X4 [Gallus gallus]
428958	4.78	2.123	-1.11434	2.56866e-16	2.25272e-16	LIPML5	BGI_novel_T004125,XM_426515.6	XP_426515.4|3.8e-243|PREDICTED: lysosomal acid lipase/cholesteryl ester hydrolase-like [Gallus gallus]
428253	10.773	4.966	-1.11497	6.12833e-145	1.40638e-145	NCAM1	XM_025143209.1,XM_015298048.2,XM_015298040.2,BGI_novel_T008552,XM_015298033.2,XM_025143210.1,NM_001128828.2,NM_001242604.1,XM_015298043.2,XM_015298032.2,XM_015298047.2,XM_025143211.1,XM_015298035.2,XM_015298045.2,XM_015298036.2,XM_015298038.2,XM_015298037.2,XM_015298041.2,XM_015298044.2,XM_015298034.2,XM_015298046.2	XP_015153532.1|0.0e+00|PREDICTED: neural cell adhesion molecule 1 isoform X14 [Gallus gallus]
429030	15.316	7.09	-1.11558	4.01873e-268	5.78078e-269	MYO10L	XM_025152430.1,XM_015289711.2	XP_015724395.1|0.0e+00|PREDICTED: unconventional myosin-X-like isoform X1 [Coturnix japonica]
100858895	6.353	2.916	-1.1176	4.83089e-146	1.10361e-146	BPTF	BGI_novel_T007391,XM_015279971.2,XM_015279968.2,BGI_novel_T007389,XM_015279964.2,XM_015279961.2,XM_015279962.2,XM_003642329.4,XM_015279970.2,XM_004946205.3,XM_015279963.2,XM_015279967.2,XM_015279969.2,XM_015279960.2,XM_015279965.2,BGI_novel_T007390	XP_015135451.1|0.0e+00|PREDICTED: nucleosome-remodeling factor subunit BPTF isoform X6 [Gallus gallus]
419963	71.01	32.39	-1.12145	0	0	MYO1D	BGI_novel_T008867,XM_418085.6,XM_004948504.3,XM_025144142.1,XM_025144141.1,BGI_novel_T008868,XM_015299284.2,XM_004948503.3,XM_004948505.3	XP_009565579.1|0.0e+00|PREDICTED: unconventional myosin-Id [Cuculus canorus]
418752	3.82	1.82	-1.12147	5.3814e-54	2.36479e-54	COL4A2	NM_001162390.1,XM_015277858.2,XM_015277856.2,XM_015277857.2,XM_015277855.2	NP_001155862.1|0.0e+00|collagen, type IV, alpha 2 precursor [Gallus gallus]
771599	0.42	0.193	-1.12211	0.000334233	0.000545881	LRRN1	NM_001097539.1	XP_009868251.1|0.0e+00|PREDICTED: leucine-rich repeat neuronal protein 1 [Apaloderma vittatum]
418368	10.76	4.926	-1.12234	1.63559e-146	3.72289e-147	SLC35A5	XM_015296666.2,XM_015296653.2,XM_025143798.1,XM_015296649.2,XM_025143795.1,XM_015296658.2	XP_015152135.1|1.4e-248|PREDICTED: probable UDP-sugar transporter protein SLC35A5 [Gallus gallus]
420205	1.126	0.483	-1.12262	4.49838e-11	4.79695e-11	LRRCC1	XM_025148021.1,XM_015282848.2,BGI_novel_T001778,XM_015282849.2	XP_015138335.1|0.0e+00|PREDICTED: leucine-rich repeat and coiled-coil domain-containing protein 1 isoform X2 [Gallus gallus]
418123	87.196	40.03	-1.12324	0	0	CREB3L2	XM_004937877.3,XM_416356.6	XP_416356.4|2.2e-296|PREDICTED: cyclic AMP-responsive element-binding protein 3-like protein 2 isoform X1 [Gallus gallus]
428095	2.13	0.976	-1.12331	8.31849e-30	5.26012e-30	RAB38	XM_015280353.2	XP_003203571.1|9.4e-119|PREDICTED: ras-related protein Rab-38 [Meleagris gallopavo]
396039	2.293	1.05	-1.12377	2.14556e-10	2.37047e-10	FOXC2	NM_205138.1	NP_990469.1|3.0e-278|forkhead box protein C2 [Gallus gallus]
417131	0.516	0.236	-1.12551	1.23388e-11	1.28346e-11	CEP350L	XM_015279813.2,XM_015279814.2	XP_015135300.1|0.0e+00|PREDICTED: centrosome-associated protein 350-like isoform X2 [Gallus gallus]
419138	1.32	0.606	-1.1279	2.52205e-24	1.78772e-24	CEP250	XM_004946950.2,XM_004946947.3,XM_015296253.2,XM_004946945.3,XM_025142331.1	XP_004947002.1|0.0e+00|PREDICTED: centrosome-associated protein CEP250 isoform X2 [Gallus gallus]
396282	1.043	0.473	-1.12821	4.91185e-08	6.07919e-08	BCL2	NM_205339.2	NP_990670.2|5.8e-135|apoptosis regulator Bcl-2 [Gallus gallus]
418043	0.416	0.193	-1.12865	0.000804928	0.00136333	CYTH4	NM_001012815.1,XM_025148643.1	NP_001012833.1|1.8e-233|cytohesin-4 [Gallus gallus]
428190	0.406	0.19	-1.13067	0.000184649	0.000294129	CLCNKB	XM_015297030.2,XM_025142660.1,XM_425749.6	XP_015152516.1|0.0e+00|PREDICTED: chloride channel protein ClC-Ka isoform X1 [Gallus gallus]
421900	4.493	2.03	-1.13179	7.21812e-79	2.45621e-79	ARHGEF10	XM_015284923.2,XM_025148842.1,BGI_novel_T002458,XM_001235642.5,XM_015284924.2,XM_015284922.2,XM_015284925.2	XP_015140411.1|0.0e+00|PREDICTED: rho guanine nucleotide exchange factor 10 isoform X4 [Gallus gallus]
395619	1.243	0.563	-1.13397	2.29867e-22	1.70249e-22	RGS12	XM_420820.6,XM_015285854.2,XM_015285852.2,XM_015285853.2,XM_015285850.1,BGI_novel_T003161,XM_015285851.2	XP_015141337.1|0.0e+00|PREDICTED: regulator of G-protein signaling 12 isoform X2 [Gallus gallus]
424149	27.296	12.72	-1.13423	0	0	MAP3K20	BGI_novel_T004491,XM_015289606.2,BGI_novel_T004492,XM_015289605.2,BGI_novel_T004490,XM_015289608.2,BGI_novel_T004493,XM_015289604.2,XM_015289603.2,XM_421996.6	XP_421996.4|0.0e+00|PREDICTED: mitogen-activated protein kinase kinase kinase MLT isoform X1 [Gallus gallus]
424121	14.05	6.4	-1.13487	0	0	ITGA4	XM_421974.6	XP_015723808.1|0.0e+00|PREDICTED: integrin alpha-4 [Coturnix japonica]
418609	0.316	0.143	-1.13538	4.94074e-05	7.45317e-05	MAP3K15	XM_025146579.1,XM_003640489.4	XP_015741770.1|0.0e+00|PREDICTED: mitogen-activated protein kinase kinase kinase 15 isoform X3 [Coturnix japonica]
427190	10.653	4.843	-1.13568	9.44124e-139	2.22553e-139	OXCT1	NM_001006578.2	NP_001006578.2|2.4e-297|succinyl-CoA:3-ketoacid coenzyme A transferase 1, mitochondrial [Gallus gallus]
428194	2.853	1.276	-1.1366	2.64286e-16	2.31945e-16	LRRC38	XM_004947497.3,BGI_novel_T008071,BGI_novel_T008070	XP_015737824.1|3.3e-173|PREDICTED: leucine-rich repeat-containing protein 38 isoform X1 [Coturnix japonica]
100857832	94.013	42.32	-1.13762	2.77823e-148	6.28333e-149	DDIT3	XM_015273173.2	XP_015128659.1|1.9e-83|PREDICTED: uncharacterized protein DDIT3 [Gallus gallus]
395225	42.046	19.053	-1.13779	7.17603e-166	1.49765e-166	TOB1	NM_001001467.1	OXB59409.1|9.0e-190|hypothetical protein ASZ78_009709 [Callipepla squamata]
107054798	0.843	0.37	-1.13805	6.39348e-07	8.46582e-07	LOC107054798	XM_015296048.2,XM_015296047.2	XP_015151533.1|1.2e-158|PREDICTED: translation initiation factor IF-2-like isoform X1 [Gallus gallus]
421945	8.38	3.783	-1.13983	7.92545e-122	2.04945e-122	LPIN1	XM_015276091.2,XM_015276092.2,XM_015276093.2,XM_015276089.2,XM_004935774.3,XM_004935771.3,XM_004935772.3,XM_419957.6,XM_015276090.2,XM_004935773.3,BGI_novel_T002468	XP_004935830.1|0.0e+00|PREDICTED: phosphatidate phosphatase LPIN1 isoform X5 [Gallus gallus]
415932	2.55	1.156	-1.14087	1.96231e-24	1.38769e-24	SEMA3DL	XM_414276.6,BGI_novel_T005937,XM_025154708.1,XM_004944449.3,XM_015292885.2,XM_015292884.2,BGI_novel_T005938	XP_015148370.1|0.0e+00|PREDICTED: semaphorin-3D-like isoform X1 [Gallus gallus]
768922	8.96	4.053	-1.14179	4.48018e-74	1.5832e-74	FAM102B	XM_001232082.5,BGI_novel_T004678,XM_015290368.2,XM_015290369.2	XP_015145855.1|2.1e-198|PREDICTED: protein FAM102B isoform X3 [Gallus gallus]
424039	3.163	1.463	-1.14367	7.78151e-86	2.51852e-86	PCNT	XM_015289209.2,XM_025152462.1,XM_025152463.1,XM_025152457.1,XM_025152458.1,XM_025152466.1,XM_025152468.1,XM_025152464.1,BGI_novel_T004391,BGI_novel_T004392,XM_025152460.1,XM_025152465.1,XM_015289223.2,XM_015289222.2,XM_025152467.1,XM_004942560.3,XM_025152469.1,XM_025152459.1,XM_025152461.1	XP_015144700.1|0.0e+00|PREDICTED: pericentrin isoform X5 [Gallus gallus]
395814	20.31	9.163	-1.14376	1.94949e-118	5.15062e-119	FMOD	NM_204967.1	OXB71611.1|8.3e-221|hypothetical protein H355_006146 [Colinus virginianus]
BGI_novel_G000091	0.453	0.203	-1.14467	4.13415e-08	5.09862e-08	BGI_novel_G000091	BGI_novel_T003067
769077	69.456	31.3	-1.14549	2.632e-300	3.42493e-301	PDGFRL	XM_001231867.5,XM_004935998.3,XM_004935999.3,XM_025149825.1	XP_004936056.1|2.6e-214|PREDICTED: platelet-derived growth factor receptor-like protein isoform X2 [Gallus gallus]
431400	0.35	0.156	-1.14627	1.4922e-09	1.7088e-09	NRARP	XM_025141493.1	XP_021269735.1|7.1e-55|notch-regulated ankyrin repeat-containing protein [Numida meleagris]
428457	0.186	0.086	-1.14699	0.000507985	0.000843704	CCR4	XM_025147519.1	XP_015137209.1|4.7e-208|PREDICTED: C-C chemokine receptor type 4 [Gallus gallus]
771487	14.063	6.266	-1.14797	0	0	MAPKBP1	XM_015287118.2,BGI_novel_T003602,XM_015287120.2,XM_015287119.2,BGI_novel_T003603,BGI_novel_T003604	XP_015142605.1|0.0e+00|PREDICTED: mitogen-activated protein kinase-binding protein 1 isoform X2 [Gallus gallus]
425900	1.553	0.7	-1.14855	1.32793e-30	8.27556e-31	ANKRD12	XM_015282496.2	XP_015137982.1|0.0e+00|PREDICTED: ankyrin repeat domain-containing protein 12 isoform X1 [Gallus gallus]
423506	0.72	0.326	-1.14897	1.30391e-11	1.3582e-11	AKAP5	XM_025151017.1,XM_015287881.2	XP_430060.3|0.0e+00|PREDICTED: A-kinase anchor protein 5 [Gallus gallus]
416099	25.776	11.626	-1.14939	2.56582e-233	4.14952e-234	PDZRN3	XM_015293224.2,XM_414432.6	XP_414432.2|0.0e+00|PREDICTED: E3 ubiquitin-protein ligase PDZRN3 isoform X1 [Gallus gallus]
424269	2.723	1.233	-1.15188	6.92131e-27	4.64855e-27	PARP9	XM_015289954.2,BGI_novel_T004594,XM_015289952.2,XM_015289953.2	XP_015145438.1|0.0e+00|PREDICTED: poly [ADP-ribose] polymerase 9 isoform X1 [Gallus gallus]
416893	90.873	41.493	-1.15201	0	0	CORO1C	NM_001277869.1,XM_025155467.1,NM_001277868.1,XM_025155468.1,XM_025155469.1	OXB62159.1|8.6e-281|hypothetical protein ASZ78_015341 [Callipepla squamata]
416730	1.846	0.856	-1.15368	1.77879e-25	1.22759e-25	PLCB4	XM_025148602.1,XM_015283487.2,XM_015283481.2,XM_015283491.2,XM_015283488.2,XM_025148601.1,XM_025148603.1,BGI_novel_T002047,XM_015283485.2,XM_025148599.1,BGI_novel_T002046,XM_015283486.2,NM_001199435.1,XM_025148598.1,XM_015283484.2,XM_025148600.1,XM_015283483.2	XP_015138967.1|0.0e+00|PREDICTED: 1-phosphatidylinositol 4,5-bisphosphate phosphodiesterase beta-4 isoform X1 [Gallus gallus]
BGI_novel_G000248	1.876	0.843	-1.15379	1.44298e-47	6.96491e-48	BGI_novel_G000248	BGI_novel_T009566
771945	0.403	0.18	-1.15382	8.42708e-06	1.19889e-05	TRPV3	XM_025141987.1,XM_025141986.1	XP_001235155.1|0.0e+00|PREDICTED: transient receptor potential cation channel subfamily V member 3 isoform X1 [Gallus gallus]
425002	55.166	24.67	-1.15396	4.17225e-227	6.87758e-228	SERPINI1	XM_025153381.1,XM_015291666.2,NM_001004411.1,XM_015291667.2	XP_015147152.1|8.0e-235|PREDICTED: neuroserpin isoform X1 [Gallus gallus]
395234	4.86	2.17	-1.15501	1.87677e-54	8.20431e-55	INVS	NM_204551.1,XM_015282368.2,XM_025147027.1,BGI_novel_T001620,XM_015282369.2	XP_015137855.1|0.0e+00|PREDICTED: inversin isoform X2 [Gallus gallus]
416746	36.67	16.466	-1.15509	0	0	CDC42BPA	XM_015283520.2,BGI_novel_T002022,XM_015283518.2,XM_015283516.2,BGI_novel_T002021,XM_015283511.2,XM_015283510.2,XM_015283514.2,XM_015283508.2,XM_015283513.2,XM_015283509.2,BGI_novel_T002020,XM_015283515.2,XM_015283517.2,NM_001199443.1,XM_015283512.2	XP_015138998.1|0.0e+00|PREDICTED: serine/threonine-protein kinase MRCK alpha isoform X5 [Gallus gallus]
427236	3.396	1.53	-1.15554	1.06798e-85	3.46099e-86	DENND4C	XM_025144802.1,XM_004949126.3,BGI_novel_T009451,XM_025144806.1,XM_025144803.1,BGI_novel_T009452,XM_025144800.1,XM_015280196.2,XM_025144805.1,XM_025144804.1	XP_004949183.1|0.0e+00|PREDICTED: DENN domain-containing protein 4C isoform X1 [Gallus gallus]
428523	5.633	2.526	-1.156	1.33737e-72	4.7927e-73	ANKRD29	XM_015277978.2,XM_426077.6	XP_426077.3|4.3e-163|PREDICTED: ankyrin repeat domain-containing protein 29 isoform X2 [Gallus gallus]
418824	1.69	0.81	-1.15729	2.82138e-30	1.77293e-30	DIAPH3	XM_015276853.2,XM_025146783.1	OPJ67047.1|0.0e+00|diaphanous-like protein 3 isoform B [Patagioenas fasciata monilis]
395798	9.376	4.21	-1.15785	6.8157e-153	1.51171e-153	ACAN	XM_015291978.2,BGI_novel_T005556,XM_015291977.2,NM_204955.2,XM_015291979.2	XP_015147465.1|0.0e+00|PREDICTED: aggrecan core protein isoform X2 [Gallus gallus]
421419	54.416	24.353	-1.15929	0	0	LOC421419	NM_001326499.1,BGI_novel_T002165,BGI_novel_T002164,NM_001326498.1,XM_015283813.2	XP_010574823.1|3.9e-153|PREDICTED: uncharacterized protein LOC104837412 isoform X1 [Haliaeetus leucocephalus]
422573	5.716	2.55	-1.15971	3.13269e-29	2.00111e-29	VEGFC	XM_420532.5	XP_420532.3|0.0e+00|PREDICTED: vascular endothelial growth factor C [Gallus gallus]
415607	3.446	1.536	-1.16214	7.90229e-116	2.11419e-116	APC	XM_004949286.3,XM_004949281.3,XM_015280450.2,BGI_novel_T009524,BGI_novel_T009522,XM_004949285.3,BGI_novel_T009516,BGI_novel_T009523,XM_015280448.2,XM_015280446.2,XM_025144933.1,BGI_novel_T009517,BGI_novel_T009525,BGI_novel_T009519,XM_004949280.3,BGI_novel_T009520,BGI_novel_T009518,BGI_novel_T009521,XM_015280443.2,XM_015280444.2,XM_004949283.3,XM_004949282.3,XM_015280445.1,XM_001233410.5	XP_004949339.1|0.0e+00|PREDICTED: adenomatous polyposis coli protein isoform X3 [Gallus gallus]
421086	1.593	0.7	-1.16304	8.3012e-17	7.1732e-17	TAF4B	XM_025147906.1,BGI_novel_T001705,XM_025147907.1,XM_419170.6,XM_015277993.2	XP_015133479.1|0.0e+00|PREDICTED: transcription initiation factor TFIID subunit 4B isoform X1 [Gallus gallus]
418516	2.016	0.893	-1.16495	9.18807e-48	4.41384e-48	HLCS	XM_416725.6,XM_015301496.2,XM_025145233.1,XM_025145239.1,XM_025145235.1	XP_416725.1|0.0e+00|PREDICTED: biotin--protein ligase isoform X1 [Gallus gallus]
373987	287.273	127.69	-1.16907	0	0	THBS1	NM_001199453.1	XP_011580633.1|0.0e+00|PREDICTED: thrombospondin-1 [Aquila chrysaetos canadensis]
421059	6.793	2.95	-1.17159	2.4639e-82	8.20499e-83	LPIN2	XM_015277940.2,XM_015277938.2,XM_015277939.2,XM_015277941.2,NM_001006386.3	NP_001006386.2|0.0e+00|phosphatidate phosphatase LPIN2 [Gallus gallus]
418150	12.856	5.726	-1.17182	2.27345e-203	4.1351e-204	B4GALNT3	BGI_novel_T000370,XM_025141582.1,XM_416381.6	XP_416381.4|0.0e+00|PREDICTED: beta-1,4-N-acetylgalactosaminyltransferase 3 [Gallus gallus]
395734	14.576	6.44	-1.17195	7.51179e-79	2.55926e-79	RHOB	NM_204909.1	OWK63298.1|7.8e-130|Rho-related GTP-binding protein RhoB [Lonchura striata domestica]
427391	24.56	10.85	-1.17338	1.23577e-74	4.34896e-75	CDO1	XM_424964.4	XP_424964.2|3.1e-118|PREDICTED: cysteine dioxygenase type 1 [Gallus gallus]
420456	14.303	6.3	-1.17362	3.19762e-273	4.48666e-274	DIP2C	XM_015282142.2,BGI_novel_T001245	XP_018534390.1|0.0e+00|PREDICTED: disco-interacting protein 2 homolog C isoform X1 [Lates calcarifer]
772263	25.483	11.3	-1.17658	3.98322e-224	6.67361e-225	SCARF2	XM_015275362.2,XM_015275361.2,XM_015275360.2	XP_015733814.1|0.0e+00|PREDICTED: scavenger receptor class F member 2 isoform X1 [Coturnix japonica]
415773	0.666	0.23	-1.17889	5.79821e-13	5.72626e-13	LRP3	XM_015292474.2,XM_004944227.3,XM_414135.6	XP_414135.2|0.0e+00|PREDICTED: low-density lipoprotein receptor-related protein 3 isoform X2 [Gallus gallus]
416835	9.616	4.24	-1.17999	8.54098e-106	2.41279e-106	VPS37B	XM_415126.6	XP_415126.1|3.5e-158|PREDICTED: vacuolar protein sorting-associated protein 37B [Gallus gallus]
418211	23.62	10.396	-1.18222	1.1303e-186	2.18744e-187	SSPN	XM_416438.6	XP_416438.1|3.4e-142|PREDICTED: sarcospan [Gallus gallus]
417896	12.77	5.59	-1.18302	0	0	EEA1	XM_015284181.2,BGI_novel_T000219,XM_416138.6,BGI_novel_T000218,XM_025154712.1,BGI_novel_T000217,XM_004937623.3	XP_010707396.2|0.0e+00|PREDICTED: early endosome antigen 1 isoform X1 [Meleagris gallopavo]
428217	0.943	0.396	-1.18307	1.54213e-16	1.34156e-16	TMEM200B	XM_004947729.3,XM_025143131.1,XM_015297749.2,XM_425776.6	XP_015738969.1|1.2e-244|PREDICTED: transmembrane protein 200B isoform X1 [Coturnix japonica]
428946	7.476	3.146	-1.18312	4.05813e-100	1.19364e-100	SAMD8	XM_426501.6,XM_015288296.2	XP_426501.3|1.9e-251|PREDICTED: sphingomyelin synthase-related protein 1 [Gallus gallus]
416470	9.25	4.07	-1.1859	6.98527e-163	1.48107e-163	TTYH3	XM_015294354.2,XM_015294355.2,XM_015294353.2	XP_019368513.1|1.1e-294|PREDICTED: protein tweety homolog 3 isoform X1 [Gavialis gangeticus]
416030	70.946	31.243	-1.18761	0	0	PLXNA1	XM_004944597.3,XM_414370.6,BGI_novel_T006054,XM_015293366.2	XP_021264843.1|0.0e+00|plexin-A1 isoform X1 [Numida meleagris]
416329	4.983	2.2	-1.18774	3.11617e-56	1.33309e-56	RAD50	XM_015294074.2,XM_004945015.3,XM_414645.5,BGI_novel_T006352	XP_021266212.1|0.0e+00|DNA repair protein RAD50 [Numida meleagris]
428401	0.843	0.39	-1.18836	2.86045e-10	3.17101e-10	ALS2CL	XM_004939096.3,XM_015281135.2,XM_004939095.3,XM_004939094.3,XM_015281134.2,XM_015281136.2	XP_015708452.1|0.0e+00|PREDICTED: ALS2 C-terminal-like protein isoform X1 [Coturnix japonica]
428592	11.71	5.136	-1.18868	3.57893e-62	1.41946e-62	MPC1	NM_001031524.1,BGI_novel_T002248	NP_001026695.1|3.4e-55|mitochondrial pyruvate carrier 1 [Gallus gallus]
419736	46.223	20.23	-1.1899	0	0	JAM3	XM_004948004.3,XM_025143367.1,XM_417876.5,XM_025143366.1	XP_004948061.2|4.4e-164|PREDICTED: junctional adhesion molecule C isoform X2 [Gallus gallus]
429129	2.713	1.186	-1.18995	3.92193e-15	3.5708e-15	SPSB4	XM_025153621.1	XP_426685.2|1.8e-160|PREDICTED: SPRY domain-containing SOCS box protein 4 [Gallus gallus]
112529975	0.446	0.193	-1.1913	0.000878751	0.00149622	LOC112529975	XM_025141351.1
420449	0.2	0.083	-1.19319	1.8859e-05	2.75396e-05	PTPRN2	XM_025148315.1,XM_025148316.1	XP_021243300.1|0.0e+00|receptor-type tyrosine-protein phosphatase N2 [Numida meleagris]
416830	2.893	1.266	-1.19356	2.02389e-59	8.29213e-60	PITPNM2	BGI_novel_T006744,XM_025155651.1,XM_004945543.3,XM_004945544.3,XM_004945545.3,BGI_novel_T006742,BGI_novel_T006743,XM_004945542.3,XM_415122.6,XM_015275601.2,XM_015275602.2,BGI_novel_T006745,XM_025155652.1,XM_004945546.3,XM_004945547.3	XP_004945604.1|0.0e+00|PREDICTED: membrane-associated phosphatidylinositol transfer protein 2 isoform X6 [Gallus gallus]
420336	25.513	11.323	-1.19376	2.45635e-295	3.26274e-296	MTSS1	XM_015283101.2,XM_015283095.2,XM_025147131.1,XM_015283102.2,NM_001030954.1,XM_015283094.2,XM_015283097.2,XM_015283103.2,XM_015283099.2,XM_015283091.2,BGI_novel_T001862,XM_015283100.2,BGI_novel_T001870,BGI_novel_T001863,BGI_novel_T001871,BGI_novel_T001857,BGI_novel_T001864,XM_015283098.2,BGI_novel_T001860,XM_015283092.2,BGI_novel_T001868,BGI_novel_T001856,BGI_novel_T001865,XM_015283105.2,BGI_novel…	XP_015138579.1|0.0e+00|PREDICTED: metastasis suppressor protein 1 isoform X3 [Gallus gallus]
428577	11.876	5.15	-1.19418	1.98698e-63	7.77331e-64	CDC42EP3	XM_015283758.2,XM_015283755.2,XM_015283757.2,XM_426134.6,XM_015283753.2	XP_426134.1|3.6e-140|PREDICTED: cdc42 effector protein 3 [Gallus gallus]
424125	36.33	15.826	-1.19668	4.17722e-239	6.59922e-240	SESTD1	BGI_novel_T004465,XM_015289563.2,XM_015289564.2,XM_015289562.2	XP_015145048.1|0.0e+00|PREDICTED: SEC14 domain and spectrin repeat-containing protein 1 isoform X1 [Gallus gallus]
395155	58.523	26.11	-1.1987	0	0	DPYSL2	XM_015297298.2,XM_015297296.2,XM_015297297.2,NM_204494.1	XP_006264110.1|0.0e+00|PREDICTED: dihydropyrimidinase-related protein 2 isoform X1 [Alligator mississippiensis]
421906	17.543	7.686	-1.20024	3.82877e-97	1.15165e-97	FBXO25	XM_004940489.3,XM_003641046.4,XM_025148886.1,XM_004940488.3	XP_004940546.1|3.1e-224|PREDICTED: F-box only protein 25 isoform X1 [Gallus gallus]
423030	16.033	6.936	-1.20114	2.21492e-55	9.56745e-56	PARVA	XM_025151217.1,XM_015286436.2,XM_004941362.3	XP_004941419.1|4.6e-188|PREDICTED: alpha-parvin isoform X3 [Gallus gallus]
424257	4.096	1.776	-1.20346	9.31724e-115	2.50425e-115	HEG1	XM_015289963.2	XP_015145449.1|0.0e+00|PREDICTED: protein HEG homolog 1 isoform X1 [Gallus gallus]
426284	17.573	7.543	-1.20709	2.56669e-306	3.29194e-307	TBL1XR1	XM_015291426.2,NM_001031369.1,XM_025153398.1,XM_025153406.1,XM_025153402.1,XM_025153399.1,XM_025153396.1,XM_025153397.1,BGI_novel_T005321,XM_025153404.1,XM_015291427.2,XM_025153400.1,XM_025153405.1,XM_025153401.1,XM_025153403.1	XP_009286304.1|6.5e-308|PREDICTED: F-box-like/WD repeat-containing protein TBL1XR1 isoform X1 [Aptenodytes forsteri]
423195	1.316	0.543	-1.21001	1.31549e-08	1.57672e-08	CHRM4	XM_015287038.2,XM_015287035.2,XM_015287037.2,XM_015287036.2,NM_001031191.1	NP_001026362.1|5.6e-283|muscarinic acetylcholine receptor M4 [Gallus gallus]
BGI_novel_G000098	8.253	3.56	-1.21059	1.96759e-181	3.87326e-182	BGI_novel_G000098	BGI_novel_T003556
395494	1.466	0.633	-1.21112	1.61161e-17	1.36246e-17	BMP7	XM_417496.6	XP_417496.5|1.6e-277|PREDICTED: bone morphogenetic protein 7 [Gallus gallus]
423734	3.686	1.583	-1.21496	2.46853e-65	9.48272e-66	KAT6B	BGI_novel_T004058,XM_015288302.2,XM_025151779.1,XM_015288301.2,XM_004942070.3,BGI_novel_T004057,XM_015288300.2,XM_421609.6,XM_015288303.2	XP_015143789.1|0.0e+00|PREDICTED: histone acetyltransferase KAT6B isoform X3 [Gallus gallus]
422438	30.17	12.983	-1.21639	0	0	PCDH18	XM_004940935.3,XM_420404.6	XP_015716538.1|0.0e+00|PREDICTED: protocadherin-18 isoform X2 [Coturnix japonica]
395802	0.183	0.076	-1.21822	2.80128e-05	4.14249e-05	PROX1	NM_001005616.1,XM_015283622.2,XM_015283620.2,XM_015283621.2	XP_015139106.1|0.0e+00|PREDICTED: prospero homeobox protein 1 isoform X1 [Gallus gallus]
424107	11.616	5.513	-1.21838	0	0	RAPH1	BGI_novel_T004457,XM_025152399.1,BGI_novel_T004455,BGI_novel_T004456	XP_015145013.1|0.0e+00|PREDICTED: ras-associated and pleckstrin homology domains-containing protein 1 isoform X2 [Gallus gallus]
417673	5.023	2.436	-1.21986	1.36638e-65	5.23468e-66	SGSM2	XM_025142092.1,XM_004946793.3,XM_025142095.1,XM_025142096.1,XM_015295859.2,BGI_novel_T007706,XM_025142093.1,XM_025142094.1	XP_004946849.1|0.0e+00|PREDICTED: small G protein signaling modulator 2 isoform X4 [Gallus gallus]
425052	34.92	14.553	-1.22306	4.94033e-303	6.37734e-304	TCP11L2	XM_015285929.2,XM_015285915.2,XM_015285922.2,XM_025150870.1,BGI_novel_T000321,NM_001001897.1	NP_001001897.1|1.7e-288|T-complex protein 11-like protein 2 [Gallus gallus]
100857927	1.143	0.49	-1.22355	7.99936e-45	3.99744e-45	SLITRK2	XM_420364.6	XP_420364.1|0.0e+00|PREDICTED: SLIT and NTRK-like protein 2 [Gallus gallus]
395825	0.32	0.136	-1.22378	0.000344286	0.000563158	SEMA3A	XM_015295177.2,NM_204977.1	KQL59788.1|0.0e+00|semaphorin-3A [Amazona aestiva]
426796	6.643	2.84	-1.22482	1.31327e-57	5.52806e-58	SNCAIP	XM_015280823.2,BGI_novel_T009647,XM_004949702.3,XM_424409.6	XP_424409.3|0.0e+00|PREDICTED: synphilin-1 isoform X1 [Gallus gallus]
396104	1.956	0.83	-1.226	6.04475e-11	6.49497e-11	SOX11	NM_205187.1	NP_990518.1|1.3e-231|transcription factor SOX-11 [Gallus gallus]
423509	4.213	1.813	-1.22745	1.51513e-238	2.40307e-239	SYNE2	XM_015287888.2,BGI_novel_T003855,XM_015287885.2,XM_015287884.2,XM_015287886.2,XM_015287882.2,BGI_novel_T003854,XM_015287887.2,XM_015287883.2	XP_015143368.1|0.0e+00|PREDICTED: nesprin-2 isoform X1 [Gallus gallus]
422636	1.57	0.683	-1.22858	6.48912e-30	4.09929e-30	SHROOM3	XM_015276433.2,XM_015276436.2,XM_004941167.3,XM_004941164.3,XM_420592.6,BGI_novel_T002939,XM_004941166.3,XM_004941163.3	XP_004941220.1|0.0e+00|PREDICTED: protein Shroom3 isoform X2 [Gallus gallus]
423782	14.206	6.056	-1.23314	9.19736e-124	2.35732e-124	VSTM4	XM_421654.5	XP_421654.3|1.7e-181|PREDICTED: V-set and transmembrane domain-containing protein 4 [Gallus gallus]
418235	32.033	13.616	-1.2332	0	0	PARVB	XM_004938030.3,XM_416459.4	XP_014795627.1|3.5e-204|PREDICTED: beta-parvin isoform X1 [Calidris pugnax]
414344	1.433	0.593	-1.23374	4.35705e-11	4.64443e-11	TRH	XM_025154454.1,NM_001030383.2,XM_015293042.2	NP_001025554.1|5.0e-151|thyrotropin releasing hormone preproprotein [Gallus gallus]
420476	3.136	1.303	-1.23378	3.29395e-49	1.54197e-49	KIAA1462	XM_025148360.1,BGI_novel_T001277,XM_025148359.1,XM_418578.6,BGI_novel_T001276,XM_025148358.1	XP_418578.4|0.0e+00|PREDICTED: junctional protein associated with coronary artery disease [Gallus gallus]
418127	0.356	0.153	-1.23393	1.35602e-11	1.41418e-11	SLC13A4	XM_416360.5,XM_025156071.1	XP_017936352.1|0.0e+00|PREDICTED: solute carrier family 13 member 4 isoform X2 [Manacus vitellinus]
417093	8.843	3.806	-1.23699	7.16583e-63	2.82421e-63	PBX3	XM_025156040.1,XM_025156039.1,BGI_novel_T007267,NM_001030678.1,XM_025156038.1	XP_004849428.2|3.0e-211|pre-B-cell leukemia transcription factor 3 isoform X1 [Heterocephalus glaber]
427253	0.46	0.193	-1.23759	0.000392335	0.000645424	GDA	XM_424835.6	XP_015704614.1|1.9e-250|PREDICTED: guanine deaminase [Coturnix japonica]
415569	8.353	3.54	-1.23787	1.74515e-132	4.26974e-133	UACA	BGI_novel_T005622,XM_015292200.2	XP_015147686.1|0.0e+00|PREDICTED: uveal autoantigen with coiled-coil domains and ankyrin repeats isoform X1 [Gallus gallus]
423976	212.823	90.056	-1.23807	0	0	ALDH18A1	XM_025151994.1,XM_025151991.1,XM_025151986.1,BGI_novel_T004288,XM_025151989.1,XM_025151987.1,XM_025151984.1,XM_025151988.1,XM_025151985.1,XM_025151993.1,XM_025151990.1,XM_025151996.1,BGI_novel_T004289,XM_025151992.1,XM_025151995.1	XP_015144484.1|0.0e+00|PREDICTED: delta-1-pyrroline-5-carboxylate synthase isoform X1 [Gallus gallus]
430019	0.39	0.186	-1.24028	1.29152e-11	1.34476e-11	HTR6	XM_025142550.1,XM_025142553.1,BGI_novel_T008061,NM_001173440.1,BGI_novel_T008060,XM_025142551.1,BGI_novel_T008062,BGI_novel_T008059,XM_025142552.1	NP_001166911.1|5.4e-247|5-hydroxytryptamine receptor 6 [Gallus gallus]
424267	1.596	0.676	-1.24044	1.59833e-14	1.48879e-14	DTX3L	XM_422114.6,XM_015289955.2	XP_015145441.1|0.0e+00|PREDICTED: E3 ubiquitin-protein ligase DTX3L isoform X2 [Gallus gallus]
424055	3.523	1.49	-1.24245	3.97892e-62	1.58058e-62	ANKRD44	BGI_novel_T004405,BGI_novel_T004407,XM_025152166.1,BGI_novel_T004408,XM_015289404.2,BGI_novel_T004406,XM_015289402.2,XM_015289400.2,NM_001012915.1,XM_025152168.1,XM_025152167.1,XM_015289403.2	XP_015144889.1|0.0e+00|PREDICTED: serine/threonine-protein phosphatase 6 regulatory ankyrin repeat subunit B isoform X4 [Gallus gallus]
396181	0.773	0.336	-1.24264	6.03198e-09	7.10944e-09	ITGB2	XM_015289134.2,XM_015289136.2,XM_015289135.2,NM_205251.1	NP_990582.1|0.0e+00|integrin beta-2 precursor [Gallus gallus]
396422	89.933	38.193	-1.24312	0	0	VCL	NM_205441.1,XM_015288203.1,BGI_novel_T004059,XM_015288202.2,XM_015288200.2,XM_015288201.2	XP_010566081.1|0.0e+00|PREDICTED: vinculin isoform X4 [Haliaeetus leucocephalus]
424477	0.626	0.27	-1.24631	6.9752e-06	9.86825e-06	PLPPR5	XM_015290744.2,XM_422320.5,XM_015290743.2,BGI_novel_T004828,XM_015290742.2,BGI_novel_T004829,XM_025152941.1	XP_422320.2|6.8e-174|PREDICTED: lipid phosphate phosphatase-related protein type 5 isoform X1 [Gallus gallus]
373928	12.643	5.65	-1.24744	2.37739e-84	7.80817e-85	PPARG	XM_025154399.1,XM_025154400.1,NM_001001460.1,XM_015292933.2,XM_015292931.2	XP_010716734.1|1.8e-278|PREDICTED: peroxisome proliferator-activated receptor gamma isoform X2 [Meleagris gallopavo]
424488	10.616	4.453	-1.24883	1.38766e-143	3.21625e-144	ARHGAP29	XM_015290631.2,XM_015290633.2,BGI_novel_T004840,XM_025152833.1,BGI_novel_T004842,XM_015290632.2,BGI_novel_T004841,NM_001244882.1,XM_015290634.2	XP_015146117.1|0.0e+00|PREDICTED: rho GTPase-activating protein 29 isoform X1 [Gallus gallus]
428453	16.78	7.056	-1.24988	0	0	FYCO1	XM_015281581.2,NM_001045839.2,XM_015281580.2,XM_015281577.2,XM_025147331.1,XM_025147332.1,XM_015281578.2,BGI_novel_T001409,XM_015281579.2	NP_001039304.2|0.0e+00|FYVE and coiled-coil domain-containing protein 1 [Gallus gallus]
419207	9.62	3.993	-1.25038	1.09533e-196	2.04234e-197	ZMYND8	XM_004947066.3,BGI_novel_T007830,XM_004947063.3,XM_015296702.2,XM_004947065.3,XM_025142395.1,XM_015296705.2,XM_015296712.2,XM_004947064.3,XM_004947062.3,XM_015296708.2,XM_025142397.1,XM_015296703.2,XM_015296714.2,BGI_novel_T007829,XM_004947068.3,XM_015296701.2,XM_004947067.3	XP_004947124.2|0.0e+00|PREDICTED: protein kinase C-binding protein 1 isoform X9 [Gallus gallus]
422768	0.376	0.173	-1.25126	4.15155e-07	5.42557e-07	ATP10D	XM_004936057.3,XM_420722.6,XM_015285487.2,XM_025150048.1	XP_420722.4|0.0e+00|PREDICTED: probable phospholipid-transporting ATPase VD isoform X1 [Gallus gallus]
112531842	1.096	0.456	-1.25291	1.61873e-16	1.40954e-16	LOC112531842	XM_025147913.1	XP_005009553.1|8.0e-74|transthyretin-like [Anas platyrhynchos]
417925	26.716	11.61	-1.25301	1.98957e-149	4.47072e-150	IKBIP	XM_001232182.5,XM_416166.6	XP_416166.1|7.1e-204|PREDICTED: inhibitor of nuclear factor kappa-B kinase-interacting protein isoform X1 [Gallus gallus]
417762	7.11	2.993	-1.25313	9.07544e-38	5.04076e-38	ING3	XM_025147569.1,XM_015280996.2,XM_025147568.1,XM_015280985.2,BGI_novel_T000146,NM_001030733.2	NP_001025904.2|4.9e-240|inhibitor of growth protein 3 [Gallus gallus]
418515	2.146	0.9	-1.25394	2.49181e-44	1.25142e-44	SIM2	XM_004934541.3	XP_004934598.1|0.0e+00|PREDICTED: single-minded homolog 2 [Gallus gallus]
426932	5.06	2.116	-1.25414	2.10709e-42	1.08887e-42	BBOX1	BGI_novel_T003335,XM_424543.5,XM_015286233.2,XM_004941332.3	XP_004941389.1|9.4e-264|PREDICTED: gamma-butyrobetaine dioxygenase isoform X1 [Gallus gallus]
415852	0.913	0.386	-1.25446	0.000816831	0.00138519	SULT2B1L1	XM_414212.6	XP_414212.3|1.7e-169|PREDICTED: sulfotransferase family cytosolic 2B member 1-like [Gallus gallus]
396550	42.026	19.7	-1.25476	0	0	SCP2	NM_001305200.1,BGI_novel_T004962	Q07598.1|0.0e+00|RecName: Full=Non-specific lipid-transfer protein; Short=NSL-TP; AltName: Full=Propanoyl-CoA C-acyltransferase; AltName: Full=SCP-chi; AltName: Full=SCPX; AltName: Full=Sterol carrier protein 2; Short=SCP-2; AltName: Full=Sterol carrier protein X; Short=SCP-X
422142	18.706	7.776	-1.25647	6.518e-153	1.44432e-153	ENOX2	XM_015278218.2,XM_015278216.2,XM_015278212.2,NM_001006427.2,BGI_novel_T002564,XM_015278213.2,XM_015278215.2,XM_015278217.2	XP_015133703.1|0.0e+00|PREDICTED: ecto-NOX disulfide-thiol exchanger 2 isoform X5 [Gallus gallus]
112530700	1.326	0.556	-1.25652	1.73998e-29	1.10713e-29	SLC5A3	XM_025145165.1,XM_025145172.1	XP_015737457.1|0.0e+00|PREDICTED: sodium/myo-inositol cotransporter [Coturnix japonica]
373932	16.89	7.036	-1.25709	7.93029e-79	2.70349e-79	NKX3-2	NM_204137.1	NP_989468.1|4.2e-155|homeobox protein Nkx-3.2 [Gallus gallus]
428187	4.163	1.73	-1.26004	1.28146e-28	8.25767e-29	CA6	XM_425745.6	XP_010721064.1|0.0e+00|PREDICTED: carbonic anhydrase 6 isoform X1 [Meleagris gallopavo]
421950	3.65	1.523	-1.26024	2.11727e-38	1.16323e-38	SMC6	NM_001321614.1	XP_013028116.1|0.0e+00|PREDICTED: structural maintenance of chromosomes protein 6 isoform X1 [Anser cygnoides domesticus]
425224	0.96	0.4	-1.26162	2.05507e-30	1.28711e-30	PLCE1	XM_015288858.2	XP_015144344.1|0.0e+00|PREDICTED: LOW QUALITY PROTEIN: 1-phosphatidylinositol 4,5-bisphosphate phosphodiesterase epsilon-1 [Gallus gallus]
423178	19.316	8.506	-1.2623	1.59354e-262	2.33862e-263	FUT8	BGI_novel_T003535,BGI_novel_T003539,NM_001004766.1,BGI_novel_T003540,BGI_novel_T003537,BGI_novel_T003538,BGI_novel_T003536	NP_001004766.1|0.0e+00|alpha-(1,6)-fucosyltransferase [Gallus gallus]
427773	11.706	4.86	-1.26307	1.60092e-95	4.84866e-96	ENTPD2L	XM_015279677.2,XM_015279676.2,XM_004945791.3,XM_015279678.2,XM_004945790.3,BGI_novel_T007088	XP_004945847.1|3.1e-291|PREDICTED: ectonucleoside triphosphate diphosphohydrolase 2-like isoform X1 [Gallus gallus]
396366	929.903	388.706	-1.26335	0	0	TPM1	XM_015278784.2,XM_015278789.2,XM_015278785.2,XM_015278791.2,XM_015278792.2,XM_015278790.2,XM_015278781.2,XM_015278793.2,XM_015278787.2,NM_205401.1,XM_015278788.2,XM_015278782.2,XM_015278786.2,XM_015278779.2,XM_015278783.2,XM_015278777.2,XM_015278778.2,XM_015278780.2,XM_015278774.2	XP_015134260.1|1.5e-148|PREDICTED: tropomyosin alpha-1 chain isoform X1 [Gallus gallus]
419209	16.203	6.753	-1.2637	1.76057e-247	2.70818e-248	SULF2	XM_025142399.1,XM_004947050.3,BGI_novel_T007836,BGI_novel_T007834,XM_025142398.1,XM_015296716.2,XM_417386.6,BGI_novel_T007835,XM_015296715.2	XP_417386.2|0.0e+00|PREDICTED: extracellular sulfatase Sulf-2 isoform X1 [Gallus gallus]
420202	3.336	1.383	-1.26388	7.82013e-25	5.48793e-25	SNX16	XM_015282795.2,NM_001199488.2,XM_015282792.2,XM_015282793.2,XM_015282794.2	NP_001186417.1|2.4e-198|sorting nexin-16 [Gallus gallus]
423816	1.596	0.666	-1.26642	7.99324e-31	4.95808e-31	CPEB3	XM_015288841.2,XM_015288837.2,XM_015288843.2,XM_015288840.2,BGI_novel_T004146,XM_015288844.2,XM_015288838.2,XM_015288842.2,XM_421688.6,XM_025151886.1,XM_015288839.2,XM_004942160.3	XP_021254936.1|0.0e+00|cytoplasmic polyadenylation element-binding protein 3 isoform X1 [Numida meleagris]
417411	0.143	0.06	-1.26806	0.000486321	0.000806509	RHBDL3	XM_015279919.2,XM_015279916.2,XM_015279918.2,XM_025141779.1,XM_015279917.2	XP_015135403.1|6.0e-231|PREDICTED: rhomboid-related protein 3 isoform X2 [Gallus gallus]
417395	12.47	5.17	-1.26892	2.05881e-159	4.43371e-160	HLF	XM_415649.6	XP_415649.4|9.6e-167|PREDICTED: hepatic leukemia factor [Gallus gallus]
421978	0.7	0.28	-1.27068	6.37564e-05	9.70653e-05	FAM228	XM_025149106.1,XM_015285041.2,XM_015285042.2	XP_015140527.1|7.5e-157|PREDICTED: protein FAM228B [Gallus gallus]
395074	285.15	117.976	-1.27134	0	0	CCDC80	NM_204431.1	NP_989762.1|0.0e+00|coiled-coil domain-containing protein 80 precursor [Gallus gallus]
395147	7.873	3.256	-1.27209	2.71308e-65	1.04334e-65	EIF2AK2	XM_015283612.2,BGI_novel_T002203,BGI_novel_T002204,NM_204487.1,XM_015283611.2,XM_015283610.2	XP_015139096.1|0.0e+00|PREDICTED: interferon-induced, double-stranded RNA-activated protein kinase isoform X1 [Gallus gallus]
107055041	0.44	0.183	-1.27474	4.72904e-11	5.04882e-11	TMEM218	BGI_novel_T008416,XM_015298094.2	XP_015153580.1|3.9e-199|PREDICTED: transmembrane protein 218 [Gallus gallus]
417398	4.583	1.883	-1.27528	3.5173e-20	2.76079e-20	TMEM100	XM_415651.5,XM_025141691.1	XP_015735621.1|9.3e-76|PREDICTED: transmembrane protein 100 isoform X1 [Coturnix japonica]
395507	2.67	1.12	-1.27784	1.05777e-34	6.1104e-35	P2RX5	NM_204748.1,XM_025141893.1,XM_015295667.2,BGI_novel_T007636,XM_025141896.1,XM_025141892.1,XM_025141897.1,XM_025141898.1,XM_025141894.1,XM_025141895.1	XP_015151153.1|1.6e-218|PREDICTED: P2X purinoceptor 5 isoform X1 [Gallus gallus]
374146	55.743	23.49	-1.27813	0	0	ERG	NM_204280.1,BGI_novel_T000712,XM_025150666.1,XM_015300252.2,BGI_novel_T000711,XM_015300250.2,BGI_novel_T000709,BGI_novel_T000710,XM_015300256.2,XM_015300260.2	XP_015155746.1|3.2e-272|PREDICTED: transcriptional regulator Erg isoform X3 [Gallus gallus]
420571	1.276	0.513	-1.27823	1.95682e-06	2.67244e-06	DYNC1I1	XM_015281907.2,XM_015281912.2,XM_015281914.1,XM_015281911.2,XM_015281917.1,XM_015281908.1,XM_015281910.1,XM_025148449.1,BGI_novel_T001330,XM_015281918.1,XM_015281915.2,XM_025148447.1,XM_015281913.2,XM_015281909.2	XP_005299914.1|0.0e+00|PREDICTED: cytoplasmic dynein 1 intermediate chain 1 isoform X1 [Chrysemys picta bellii]
408252	35.82	14.81	-1.28006	0	0	CTDSPL	XM_015281052.2,XM_025147078.1,XM_025147079.1,NM_001001316.1	OPJ85238.1|3.5e-157|CTD small phosphatase-like protein isoform A [Patagioenas fasciata monilis]
396361	21.663	8.616	-1.28133	2.82681e-289	3.81946e-290	INHBA	NM_205396.1,XM_015281320.2	XP_010711404.1|1.0e-273|PREDICTED: inhibin beta A chain [Meleagris gallopavo]
395683	5.45	2.23	-1.28278	4.29477e-38	2.37294e-38	MMP13	NM_001293090.1	NP_001280019.1|3.2e-286|collagenase 3 precursor [Gallus gallus]
419003	2.823	1.156	-1.2828	1.32978e-47	6.41024e-48	CEP295	XM_004938870.3,XM_015280441.2,XM_004938871.3,BGI_novel_T001066	XP_004938927.1|0.0e+00|PREDICTED: centrosomal protein of 295 kDa isoform X1 [Gallus gallus]
424176	2.963	1.29	-1.28327	1.79824e-40	9.56183e-41	TTC21B	XM_422022.6,BGI_novel_T004515,XM_015289741.2	XP_015724085.1|0.0e+00|PREDICTED: tetratricopeptide repeat protein 21B isoform X1 [Coturnix japonica]
428524	1.586	0.656	-1.28408	5.90878e-49	2.77955e-49	LAMA3	XM_426078.6,XM_015277980.2,XM_004939788.3	XP_004939845.2|0.0e+00|PREDICTED: laminin subunit alpha-3 isoform X3 [Gallus gallus]
769198	29.743	12.15	-1.28415	0	0	PLEKHO2	XM_025153995.1,XM_003641823.4	XP_003641871.1|0.0e+00|PREDICTED: pleckstrin homology domain-containing family O member 2 [Gallus gallus]
421246	18.596	7.656	-1.2844	3.11731e-222	5.24877e-223	RIN2	XM_015283395.2,BGI_novel_T001963,XM_025149378.1,XM_015283399.2,XM_025149382.1,XM_004940160.3,XM_025149379.1,XM_025149381.1,XM_025149380.1,XM_015283396.2,XM_004940159.3	XP_004940217.1|0.0e+00|PREDICTED: ras and Rab interactor 2 isoform X2 [Gallus gallus]
422832	1.78	0.74	-1.2844	1.11007e-53	4.90343e-54	CPEB2	XM_015285804.2,XM_015285803.2	XP_015141289.1|0.0e+00|PREDICTED: cytoplasmic polyadenylation element-binding protein 2 isoform X1 [Gallus gallus]
374034	32.816	13.416	-1.28443	0	0	AFAP1	NM_204205.1,BGI_novel_T003157,NM_001134648.1	NP_001128120.1|0.0e+00|actin filament-associated protein 1 isoform b [Gallus gallus]
396359	0.956	0.396	-1.28489	2.58218e-08	3.15345e-08	SYNPR	XM_015293016.2,XM_015293015.1,NM_205394.1	NP_990725.1|5.1e-154|synaptoporin precursor [Gallus gallus]
420728	3.76	1.52	-1.28508	9.21115e-107	2.5887e-107	TRANK1	XM_015281695.2,XM_004939508.3,XM_004939507.3	XP_004939564.2|0.0e+00|PREDICTED: TPR and ankyrin repeat-containing protein 1 isoform X1 [Gallus gallus]
420304	3.063	1.113	-1.28603	3.89871e-30	2.45559e-30	TSNARE1	XM_015283229.2,BGI_novel_T001901,XM_025148189.1,XM_025148190.1,XM_015283230.2,BGI_novel_T001900	XP_015138715.1|1.0e-153|PREDICTED: t-SNARE domain-containing protein 1 [Gallus gallus]
423825	0.34	0.136	-1.28692	4.64552e-08	5.74281e-08	ADGRA1L	XM_025151896.1	XP_421695.4|0.0e+00|PREDICTED: adhesion G protein-coupled receptor A3 [Gallus gallus]
770534	2.99	1.216	-1.28763	6.90914e-16	6.15413e-16	C5H15ORF62	XM_001232487.5	XP_001232488.1|5.3e-97|PREDICTED: uncharacterized protein C15orf62 homolog, mitochondrial [Gallus gallus]
768784	1.82	0.743	-1.28822	1.77301e-09	2.03627e-09	C1QTNF1	XM_001231906.4	XP_006036981.1|2.5e-106|PREDICTED: complement C1q tumor necrosis factor-related protein 1 [Alligator sinensis]
417421	0.53	0.213	-1.28912	0.000108674	0.000169426	C18H17orf58	XM_015279975.2	XP_015135461.1|4.8e-222|PREDICTED: UPF0450 protein C17orf58 homolog isoform X1 [Gallus gallus]
416352	1.883	0.673	-1.28917	4.94189e-38	2.73459e-38	JAKMIP2	BGI_novel_T006372,BGI_novel_T006371,XM_015294048.2,BGI_novel_T006369,XM_015294044.2,XM_004945054.3,XM_025155033.1,XM_015294047.2,XM_414668.6,BGI_novel_T006370,XM_004945058.3	XP_010717515.1|0.0e+00|PREDICTED: janus kinase and microtubule-interacting protein 2 isoform X2 [Meleagris gallopavo]
768390	63.383	25.896	-1.29055	0	0	PDPN	XM_015297203.2,XM_004947496.3,XM_004947495.3,XM_001231315.5	XP_001231316.1|7.4e-74|PREDICTED: podoplanin isoform X2 [Gallus gallus]
428948	175.903	71.376	-1.29368	0	0	PDLIM1	XM_004942091.3,XM_025151869.1,XM_426503.6	XP_426503.4|7.5e-189|PREDICTED: PDZ and LIM domain protein 1 isoform X4 [Gallus gallus]
693248	0.75	0.3	-1.29383	1.14032e-06	1.53458e-06	MAF	XM_015292515.2,NM_001044671.1,XM_015292514.2	NP_001038136.1|7.2e-216|transcription factor Maf [Gallus gallus]
771715	19.08	7.566	-1.29397	1.0355e-157	2.24291e-158	CD2AP	XM_025148820.1,BGI_novel_T002527,BGI_novel_T002526,XM_015285165.1,XM_015285164.2,XM_015285163.2,NM_001318403.1,BGI_novel_T002525	NP_001305332.1|0.0e+00|CD2-associated protein [Gallus gallus]
424474	16.563	6.746	-1.29455	2.48974e-294	3.31227e-295	AGL	XM_015290745.2,XM_015290747.2,BGI_novel_T004825,BGI_novel_T004824,XM_015290750.2,BGI_novel_T004826,XM_015290748.2	XP_015146231.1|0.0e+00|PREDICTED: glycogen debranching enzyme isoform X1 [Gallus gallus]
395565	136.226	55.71	-1.2951	0	0	VCAN	XM_015280584.2,XM_015280585.2,XM_015280586.2,NM_204787.1,BGI_novel_T009588	NP_990118.1|0.0e+00|versican core protein precursor [Gallus gallus]
395759	12	4.893	-1.29543	0	0	SLC8A3	XM_025150589.1,NM_001293097.1,XM_025150590.1,XM_025150587.1,XM_015287282.2,BGI_novel_T003655,XM_025150588.1	XP_021396417.1|0.0e+00|sodium/calcium exchanger 3 isoform X2 [Lonchura striata domestica]
419951	0.593	0.243	-1.29675	5.84342e-20	4.61697e-20	TANC2	XM_015299380.2,XM_015299384.2,XM_025144209.1,XM_004948527.3,XM_015299383.2,XM_015299387.2,XM_015299382.2,BGI_novel_T008886,XM_004948524.3,XM_015299378.2,XM_004948525.3,XM_015299381.2,BGI_novel_T008884,XM_004948528.3,XM_025144210.1,BGI_novel_T008885,XM_015299386.2,XM_015299379.2,XM_015299385.2	XP_015154871.1|0.0e+00|PREDICTED: protein TANC2 isoform X9 [Gallus gallus]
422945	93.503	39.366	-1.2982	0	0	C4H20ORF194	XM_015286046.2,XM_015286047.2,BGI_novel_T003212,XM_420883.6	XP_420883.4|0.0e+00|PREDICTED: uncharacterized protein C20orf194 homolog isoform X1 [Gallus gallus]
395956	10.02	4.066	-1.29992	1.86405e-207	3.3362e-208	GLI2	NM_001271902.1,XM_015289786.2,NM_001271901.1,XM_015289787.2,XM_025152142.1,BGI_novel_T004573	NP_001258830.1|0.0e+00|zinc finger protein GLI2 isoform 1 [Gallus gallus]
416778	58.966	23.786	-1.30063	0	0	43713	XM_025155436.1,XM_015275241.2,XM_025155434.1,NM_001030654.2,XM_025155435.1,XM_025155437.1	KQK74998.1|8.3e-206|septin-5 [Amazona aestiva]
419449	39.503	15.883	-1.30136	0	0	KIF1B	XM_015297163.2,XM_025142650.1,XM_015297160.2,XM_015297165.2,XM_015297162.2,XM_004947461.3,BGI_novel_T008025,XM_417608.6,XM_025142651.1,XM_015297159.2,XM_025142654.1,XM_025142652.1	XP_015737868.1|0.0e+00|PREDICTED: kinesin-like protein KIF1B isoform X8 [Coturnix japonica]
BGI_novel_G000010	0.876	0.356	-1.30172	1.46692e-20	1.13922e-20	BGI_novel_G000010	BGI_novel_T000447
427351	0.853	0.356	-1.30382	4.49447e-23	3.2746e-23	RFX3	XM_004949060.3,XM_015280206.2,XM_003642990.4	XP_003643038.1|0.0e+00|PREDICTED: transcription factor RFX3 isoform X1 [Gallus gallus]
425792	0.523	0.21	-1.30393	3.26742e-21	2.4913e-21	MAP3K9	XM_015287580.2	XP_015143066.1|0.0e+00|PREDICTED: mitogen-activated protein kinase kinase kinase 9 [Gallus gallus]
378897	808.833	325.503	-1.3057	0	0	THY1	NM_204381.2	OXB65740.1|1.0e-87|hypothetical protein ASZ78_004416 [Callipepla squamata]
421639	0.57	0.233	-1.30612	5.4597e-07	7.19645e-07	CCDC170	XM_419678.6,XM_004935629.3,XM_025149276.1	OPJ72912.1|2.6e-259|coiled-coil domain-containing protein 170 isoform A [Patagioenas fasciata monilis]
420361	214.896	86.846	-1.30677	0	0	ENPP2	XM_015283028.2,XM_025147139.1,XM_015283024.2,BGI_novel_T001842,XM_015283034.2,XM_015283033.2,NM_001198662.1,XM_015283027.2,XM_015283025.2,XM_015283031.2,XM_015283030.2,XM_025147137.1,XM_015283026.2,XM_015283029.2	XP_015138515.1|0.0e+00|PREDICTED: ectonucleotide pyrophosphatase/phosphodiesterase family member 2 isoform X6 [Gallus gallus]
416774	18.886	7.62	-1.30783	3.3017e-268	4.7425e-269	YPEL1	XM_415068.6,XM_015275692.2	XP_018102066.1|1.6e-92|PREDICTED: yippee like 1 L homeolog isoform X1 [Xenopus laevis]
427421	0.14	0.056	-1.30798	2.8226e-06	3.89299e-06	PDZD2	XM_015277501.2,XM_424994.5,XM_004937164.2,XM_015277500.1,XM_015277499.1,XM_015277498.2,XM_004937167.3,XM_004937168.3,XM_015277502.2,XM_004937166.2	XP_004937223.1|0.0e+00|PREDICTED: PDZ domain-containing protein 2 isoform X3 [Gallus gallus]
396407	0.91	0.37	-1.30899	6.15669e-10	6.92111e-10	TEC	XM_025149535.1,XM_015285422.2,BGI_novel_T003087,XM_015285421.2,NM_001030372.1,XM_015285420.1,XM_015285423.2	XP_015140905.1|0.0e+00|PREDICTED: tyrosine-protein kinase Tec isoform X1 [Gallus gallus]
417217	21.69	8.476	-1.31161	8.67491e-269	1.23884e-269	DNM1	XM_015279552.2,XM_004945829.3,XM_015279550.2,XM_004945825.3,XM_025141433.1,XM_015279546.2,XM_004945831.3,XM_015279547.2,XM_003642258.4,XM_015279549.2,XM_025141434.1,XM_001233249.5,BGI_novel_T007110,XM_015279551.2,XM_015279548.2	XP_015135034.1|0.0e+00|PREDICTED: dynamin-1 isoform X5 [Gallus gallus]
396133	6820.72	2740.52	-1.31336	0	0	FN1	XM_015289128.2,BGI_novel_T004335,XM_015289133.2,XM_015289131.2,BGI_novel_T004336,XM_015289129.2,BGI_novel_T004334,XM_015289132.2,BGI_novel_T004332,BGI_novel_T004333,NM_001198712.1	XP_021254877.1|0.0e+00|fibronectin isoform X1 [Numida meleagris]
423881	33.37	13.326	-1.3152	1.15795e-97	3.46611e-98	GSTO1	XM_015288649.2,NM_001277375.1	NP_001264304.1|5.0e-135|glutathione S-transferase omega-1 [Gallus gallus]
420174	2.193	0.99	-1.31571	3.29608e-60	1.34017e-60	SLCO5A1	BGI_novel_T001756,XM_015282904.2,BGI_novel_T001757	XP_015138390.1|0.0e+00|PREDICTED: solute carrier organic anion transporter family member 5A1 [Gallus gallus]
424062	14.306	5.743	-1.31735	3.23376e-251	4.90707e-252	RFTN2	NM_001277422.2,XM_015289408.2,XM_015289409.2,XM_025152169.1	NP_001264351.1|3.9e-271|raftlin-2 [Gallus gallus]
770854	8.913	3.56	-1.31737	1.08515e-45	5.35279e-46	CAMKV	XM_015292846.2	XP_014725056.1|9.0e-206|PREDICTED: caM kinase-like vesicle-associated protein [Sturnus vulgaris]
416955	70.576	28.203	-1.31855	0	0	YWHAH	NM_001007839.1	NP_001007840.1|6.5e-135|14-3-3 protein eta [Gallus gallus]
417540	56.36	22.96	-1.3186	1.5643e-138	3.69395e-139	PSPH	NM_001252272.1,XM_015295730.2,XM_015295731.2,XM_025141953.1	XP_015151216.1|4.5e-129|PREDICTED: phosphoserine phosphatase isoform X1 [Gallus gallus]
417247	47.113	18.736	-1.32107	9.96637e-183	1.95155e-183	TNFSF15	NM_001024578.1	NP_001019749.1|8.3e-130|tumor necrosis factor ligand superfamily member 15 [Gallus gallus]
421519	27.17	10.866	-1.32153	0	0	KCNK1	XM_419561.6	XP_419561.1|2.3e-190|PREDICTED: potassium channel subfamily K member 1 [Gallus gallus]
770295	0.84	0.333	-1.32165	0.000138614	0.000218178	LOC770295	XM_025150463.1	XP_015141353.1|1.9e-128|PREDICTED: uncharacterized protein LOC770295 [Gallus gallus]
101747378	3.07	1.226	-1.3226	2.0811e-61	8.31453e-62	PARP14	XM_025152692.1,XM_025152693.1,XM_025152691.1,XM_015289950.2,XM_015289949.2,XM_015289948.2,BGI_novel_T004593	XP_015145434.1|0.0e+00|PREDICTED: poly [ADP-ribose] polymerase 14 [Gallus gallus]
395357	0.65	0.263	-1.32284	8.57001e-19	7.00466e-19	CENPF	XM_015283614.2,XM_015283615.2,XM_015283613.1,XM_015283616.1,XM_025148495.1,NM_204645.2	NP_989976.2|0.0e+00|centromere protein F [Gallus gallus]
771419	1.356	0.45	-1.32375	2.02465e-09	2.33201e-09	ANKRD22	XM_015288400.2,NM_001277405.1	NP_001264334.1|1.5e-103|ankyrin repeat domain-containing protein 22 [Gallus gallus]
395790	5.02	2	-1.32578	4.1421e-40	2.21023e-40	LFNG	NM_204948.1	NP_990279.1|1.9e-212|beta-1,3-N-acetylglucosaminyltransferase lunatic fringe precursor [Gallus gallus]
417231	8.766	3.396	-1.32659	3.40381e-232	5.52597e-233	COL27A1	XM_015279699.2,XM_025141345.1,BGI_novel_T007099,BGI_novel_T007098,BGI_novel_T007101,XM_025141346.1,XM_025141347.1,BGI_novel_T007100,XM_025141348.1	XP_015135184.1|0.0e+00|PREDICTED: collagen alpha-1(XXVII) chain isoform X1 [Gallus gallus]
418736	8.27	3.293	-1.32731	2.15465e-105	6.11365e-106	RASA3	NM_001012825.1	NP_001012843.1|0.0e+00|ras GTPase-activating protein 3 [Gallus gallus]
770238	12.55	4.996	-1.32892	5.82561e-154	1.28605e-154	KLF9	XM_003643019.4	XP_003643067.1|6.7e-135|PREDICTED: Krueppel-like factor 9 [Gallus gallus]
427301	15.35	6.1	-1.32987	2.04988e-263	2.98702e-264	SLC44A1	BGI_novel_T009562,XM_015280512.2,XM_003643040.4	XP_003643088.1|0.0e+00|PREDICTED: choline transporter-like protein 1 isoform X1 [Gallus gallus]
BGI_novel_G000127	0.61	0.243	-1.33041	2.61906e-08	3.20012e-08	BGI_novel_G000127	BGI_novel_T005417
424026	38.723	15.23	-1.33042	0	0	ARL4C	BGI_novel_T004350,XM_001237034.5	AAH49804.1|4.6e-105|Arl4c protein, partial [Mus musculus]
422427	0.163	0.066	-1.3307	8.65144e-05	0.00013335	DDX60	BGI_novel_T002774,XM_015285390.2,XM_004940918.3	XP_004940975.1|0.0e+00|PREDICTED: probable ATP-dependent RNA helicase DDX60 [Gallus gallus]
431643	3.733	1.43	-1.33144	6.32356e-75	2.21621e-75	GLIS3	XM_004949062.2,XM_003642989.4	XP_004949119.1|0.0e+00|PREDICTED: zinc finger protein GLIS3 [Gallus gallus]
421718	10.87	4.3	-1.3317	2.83239e-83	9.3732e-84	HEY2	XM_015284442.2,BGI_novel_T002342	XP_015139928.1|1.1e-188|PREDICTED: hairy/enhancer-of-split related with YRPW motif protein 2 [Gallus gallus]
428184	0.153	0.066	-1.33211	4.20295e-05	6.29564e-05	SCNN1D	XM_425742.6,XM_004947418.3,XM_015297121.2	XP_425742.3|0.0e+00|PREDICTED: amiloride-sensitive sodium channel subunit delta [Gallus gallus]
395090	1.58	0.696	-1.33245	2.78432e-17	2.36778e-17	TNFRSF8	NM_204444.2,XM_015296814.2,XM_015296815.2,XM_015296813.2,XM_015296816.2,XM_015296818.2,XM_015296817.2	XP_015152303.1|1.0e-245|PREDICTED: tumor necrosis factor receptor superfamily member 8 isoform X2 [Gallus gallus]
427305	2.576	1.093	-1.33804	3.56058e-24	2.53793e-24	TMEM38B	XM_004949357.3,XM_015280517.2,XM_015280518.2,XM_424887.5	XP_424887.1|4.0e-161|PREDICTED: trimeric intracellular cation channel type B isoform X1 [Gallus gallus]
428648	0.15	0.06	-1.33887	5.3893e-05	8.15895e-05	KBTBD11	XM_025148844.1,XM_025148843.1,XM_426206.6	XP_426206.1|0.0e+00|PREDICTED: kelch repeat and BTB domain-containing protein 11 [Gallus gallus]
374251	31.37	12.383	-1.33969	4.9841e-299	6.52708e-300	TGFBR3	NM_204339.1	NP_989670.1|0.0e+00|transforming growth factor beta receptor type 3 precursor [Gallus gallus]
420872	16.366	6.426	-1.34068	1.82504e-51	8.2703e-52	LY86	NM_001004399.1	NP_001004399.1|4.0e-87|lymphocyte antigen 86 precursor [Gallus gallus]
416346	0.186	0.076	-1.34193	0.000455636	0.000753822	SH3RF2	XM_414662.6,XM_015294060.2,XM_004945041.3	XP_414662.3|0.0e+00|PREDICTED: putative E3 ubiquitin-protein ligase SH3RF2 isoform X1 [Gallus gallus]
395186	3.613	1.41	-1.34248	1.05062e-48	4.96188e-49	IL17RD	NM_204515.1,XM_025154412.1,XM_025154411.1	CAD48485.1|0.0e+00|sef protein, partial [Gallus gallus]
378908	39.846	15.57	-1.34329	7.56471e-211	1.33503e-211	SLA	XM_025147006.1,XM_015283077.2,XM_015283079.2,NM_204391.1	NP_989722.1|1.5e-163|src-like-adapter [Gallus gallus]
424350	34.22	13.456	-1.34387	0	0	NEK7	XM_025152803.1,NM_001031264.1,XM_015290270.2,XM_015290271.1	XP_015145757.1|2.4e-153|PREDICTED: serine/threonine-protein kinase Nek7 isoform X2 [Gallus gallus]
427386	0.466	0.183	-1.34565	3.05583e-07	3.95485e-07	DTWD2	NM_001031442.1	NP_001026613.1|6.4e-151|DTW domain-containing protein 2 [Gallus gallus]
112530328	3.236	1.27	-1.3459	1.44992e-15	1.30474e-15	LOC112530328	XM_025143831.1	XP_013440342.1|6.2e-06|hypothetical protein, conserved [Eimeria necatrix]
417173	18.266	7.19	-1.348	0	0	RAPGEF1	XM_015279748.2,BGI_novel_T007161,XM_015279745.2,XM_015279749.2,XM_015279743.2,XM_015279751.2,BGI_novel_T007160,XM_015279742.2,XM_015279747.2,XM_015279750.2,XM_015279741.2,XM_015279752.2,BGI_novel_T007159,XM_015279744.2,XM_015279746.2	XP_015135232.1|0.0e+00|PREDICTED: rap guanine nucleotide exchange factor 1 isoform X6 [Gallus gallus]
425587	19.343	7.546	-1.35068	1.36853e-74	4.81902e-75	FEZ1	XM_025143261.1	XP_015153562.1|1.1e-224|PREDICTED: fasciculation and elongation protein zeta-1 [Gallus gallus]
395862	9.71	3.76	-1.35354	4.73107e-46	2.32094e-46	PITX2	XM_025149515.1,XM_025149516.1,NM_205010.1	NP_990341.1|1.2e-191|pituitary homeobox 2 [Gallus gallus]
396332	28.99	11.353	-1.35365	3.17289e-270	4.49812e-271	SEMA3D	XM_025146913.1,XM_015295302.2,XM_015295369.2,NM_205373.1,BGI_novel_T000080	XP_011570190.1|0.0e+00|PREDICTED: semaphorin-3D isoform X1 [Aquila chrysaetos canadensis]
421506	0.336	0.136	-1.35868	0.000179205	0.000284825	LOC421506	XM_015283958.2,XM_025149184.1,XM_015283959.2,XM_015283960.2,XM_015283957.2,XM_015283961.2,XM_025149183.1,BGI_novel_T002220,XM_025149186.1,XM_025149185.1,XM_015283962.2	XP_015139443.1|3.3e-184|PREDICTED: uncharacterized protein LOC421506 [Gallus gallus]
374008	0.096	0.036	-1.35927	1.30297e-05	1.87915e-05	EPHA6	XM_015297990.2,XM_015297996.2,XM_015297999.2,XM_015298018.2,XM_025144482.1,XM_416644.5,XM_015298005.2	XP_015153491.1|0.0e+00|PREDICTED: ephrin type-A receptor 6 isoform X4 [Gallus gallus]
417719	0.413	0.16	-1.36045	0.000175382	0.000278457	NAPEPLD	NM_001030730.1,XM_015275729.2,XM_015275728.2	XP_015131214.1|2.6e-242|PREDICTED: N-acyl-phosphatidylethanolamine-hydrolyzing phospholipase D isoform X1 [Gallus gallus]
416083	8.23	3.176	-1.36125	1.1851e-165	2.47578e-166	MAGI1	XM_025154749.1,BGI_novel_T006102,BGI_novel_T006103,XM_025154746.1,XM_015293282.2,BGI_novel_T006108,XM_025154738.1,XM_025154740.1,XM_025154735.1,XM_025154741.1,XM_015293284.2,XM_015293264.2,XM_015293265.2,XM_025154739.1,XM_025154742.1,XM_025154745.1,XM_015293286.2,XM_015293283.2,XM_025154744.1,XM_015293268.2,BGI_novel_T006106,XM_025154737.1,XM_015293281.2,XM_015293269.2,BGI_novel_T006104,XM_015293…	XP_015148751.1|0.0e+00|PREDICTED: membrane-associated guanylate kinase, WW and PDZ domain-containing protein 1 isoform X2 [Gallus gallus]
422699	87.203	33.766	-1.36198	0	0	PDLIM5	XM_015276304.2,XM_015276310.2,BGI_novel_T003039,BGI_novel_T003032,XM_025149669.1,XM_015276294.2,XM_025149678.1,XM_025149670.1,XM_025149671.1,XM_025149666.1,XM_025149668.1,BGI_novel_T003038,XM_025149673.1,XM_015276311.2,BGI_novel_T003035,XM_025149679.1,BGI_novel_T003037,XM_015276313.2,XM_015276314.2,XM_015276312.2,BGI_novel_T003036,BGI_novel_T003034,NM_001031149.1,XM_025149677.1,BGI_novel_T003031,…	XP_010708316.1|0.0e+00|PREDICTED: PDZ and LIM domain protein 5 isoform X3 [Meleagris gallopavo]
423635	3.116	1.22	-1.36282	1.86939e-27	1.23844e-27	SRRL	BGI_novel_T003963,XM_004941975.3,XM_004941971.2,XM_025151655.1,XM_025151653.1,XM_025151652.1,XM_025151651.1,XM_025151650.1,XM_025151654.1,XM_015288053.1,BGI_novel_T003962	XP_015143539.1|0.0e+00|PREDICTED: putative threonine dehydratase isoform X2 [Gallus gallus]
424426	8.703	3.38	-1.36367	3.49904e-82	1.16666e-82	TOR3A	XM_422270.5	XP_422270.1|1.2e-237|PREDICTED: torsin-3A [Gallus gallus]
407778	0.33	0.133	-1.36632	0.000512261	0.000851125	ST6GALNAC5	NM_001277494.1,XM_025152776.1,XM_025152774.1,XM_025152775.1,XM_025152777.1,XM_025152773.1	XP_015146291.1|1.4e-157|PREDICTED: alpha-N-acetylgalactosaminide alpha-2,6-sialyltransferase 5 isoform X1 [Gallus gallus]
395695	9.053	3.506	-1.36656	0	0	AKAP9	NM_207179.2	NP_997062.2|0.0e+00|A-kinase anchor protein 9 [Gallus gallus]
428790	1.606	0.603	-1.36674	2.68545e-42	1.38998e-42	ARAP2	XM_426346.6,XM_015285685.2,XM_004936122.3	XP_004936179.2|0.0e+00|PREDICTED: arf-GAP with Rho-GAP domain, ANK repeat and PH domain-containing protein 2 isoform X2 [Gallus gallus]
395441	1.906	0.843	-1.36712	5.57963e-23	4.07219e-23	TLL1	XM_015285274.2,NM_204703.2,BGI_novel_T002773,XM_015285275.2	XP_015140761.1|1.5e-256|PREDICTED: tolloid-like protein 1 isoform X2 [Gallus gallus]
418625	2.95	1.18	-1.36736	1.23157e-23	8.88854e-24	ASB9	XM_025149757.1,BGI_novel_T000766,XM_015273223.2,NM_001006262.1,XM_015273215.2	XP_015128701.1|1.3e-170|PREDICTED: ankyrin repeat and SOCS box protein 9 isoform X1 [Gallus gallus]
428579	76.43	29.4	-1.36901	0	0	ADSS	XM_015283953.1,NM_001031521.1	XP_010560894.1|1.3e-256|PREDICTED: adenylosuccinate synthetase isozyme 2 [Haliaeetus leucocephalus]
424120	1.96	0.77	-1.37367	1.18765e-21	8.95425e-22	CERKL	XM_421973.5,XM_025152409.1,XM_015289554.2,XM_015289553.2	XP_421973.4|0.0e+00|PREDICTED: ceramide kinase-like protein isoform X1 [Gallus gallus]
419589	5.513	2.113	-1.37466	1.6804e-69	6.18619e-70	LDLRAP1	XM_015297732.2	XP_021231334.1|1.2e-186|low density lipoprotein receptor adapter protein 1 isoform X2 [Numida meleagris]
419933	509.613	196.06	-1.37647	0	0	PRELP	XM_418054.6	OXB54852.1|1.4e-219|hypothetical protein ASZ78_000291, partial [Callipepla squamata]
427333	0.796	0.306	-1.37748	9.10019e-20	7.22424e-20	PTBP3	BGI_novel_T009611,XM_015280703.2,XM_015280702.1,XM_004949517.3,XM_004949515.3,XM_015280701.1,XM_424912.6,BGI_novel_T009609,BGI_novel_T009610,BGI_novel_T009608,XM_015280704.2,XM_025144918.1	XP_004949574.1|1.8e-284|PREDICTED: polypyrimidine tract-binding protein 3 isoform X2 [Gallus gallus]
107049018	0.71	0.27	-1.3783	9.66336e-06	1.3806e-05	LOC107049018	BGI_novel_T007977,XM_015297099.2	XP_015152585.1|4.1e-180|PREDICTED: uncharacterized protein LOC107049018 [Gallus gallus]
BGI_novel_G000025	1.713	0.656	-1.3792	1.91664e-38	1.05221e-38	BGI_novel_G000025	BGI_novel_T000698
423789	27.766	10.66	-1.37932	1.80873e-241	2.8349e-242	LIPA	XM_421661.6	XP_421661.3|9.2e-237|PREDICTED: lysosomal acid lipase/cholesteryl ester hydrolase [Gallus gallus]
430336	2.776	1.023	-1.38	1.72468e-54	7.53585e-55	SMARCD3	XM_015281036.2,XM_004939024.3,XM_015281041.2,XM_015281035.2,XM_004939026.3,BGI_novel_T001140,XM_015281038.2,BGI_novel_T001139,XM_025148186.1,XM_015281037.2	XP_005040475.1|4.4e-267|PREDICTED: SWI/SNF-related matrix-associated actin-dependent regulator of chromatin subfamily D member 3 isoform X3 [Ficedula albicollis]
395398	2.92	1.143	-1.38155	1.34148e-38	7.34779e-39	NRXN1	XM_015278017.2,XM_015278033.2,XM_025148511.1,BGI_novel_T001987,XM_015278020.2,XM_025148507.1,BGI_novel_T001979,XM_015278036.2,XM_015278018.2,BGI_novel_T001984,XM_025148506.1,BGI_novel_T001986,XM_015278034.2,BGI_novel_T001985,XM_025148501.1,XM_025148497.1,XM_025148498.1,XM_025148514.1,XM_015278027.2,BGI_novel_T001988,XM_025148510.1,XM_015278021.2,XM_015278023.2,XM_025148505.1,NM_001198976.1,BGI_no…	XP_008499365.1|0.0e+00|PREDICTED: neurexin-1-beta isoform X1 [Calypte anna]
421104	0.746	0.286	-1.38164	6.22633e-15	5.70513e-15	DTNA	XM_025147927.1,XM_025147951.1,XM_025147934.1,XM_015282622.2,XM_025147948.1,XM_025147946.1,XM_025147950.1,XM_025147938.1,XM_025147933.1,XM_025147929.1,XM_025147944.1,XM_025147937.1,XM_025147940.1,XM_025147943.1,XM_025147932.1,XM_025147930.1,XM_025147931.1,XM_025147949.1,XM_025147942.1,XM_025147947.1,XM_025147945.1,XM_025147935.1,XM_025147939.1,XM_025147925.1,BGI_novel_T001715,XM_025147924.1,XM_025…	XP_015138107.1|0.0e+00|PREDICTED: dystrobrevin alpha isoform X1 [Gallus gallus]
396536	248.72	94.433	-1.3825	0	0	APOA1	XM_015297971.2,NM_205525.4	NP_990856.1|2.9e-142|apolipoprotein A-I preproprotein [Gallus gallus]
424910	1.403	0.533	-1.38327	2.59958e-12	2.63433e-12	CLDN1	NM_001013611.2	NP_001013629.1|1.1e-116|claudin-1 [Gallus gallus]
428899	0.21	0.076	-1.38381	1.18005e-11	1.22599e-11	CEP128	XM_004941843.3,XM_025151095.1,XM_025151096.1	XP_019471359.1|0.0e+00|PREDICTED: centrosomal protein of 128 kDa isoform X6 [Meleagris gallopavo]
417151	21.42	8.303	-1.38542	1.55405e-219	2.63601e-220	CACFD1	NM_001277657.1,BGI_novel_T007177,XM_025156059.1,XM_025156058.1	XP_004945998.2|2.6e-92|PREDICTED: A disintegrin and metalloproteinase with thrombospondin motifs 13 isoform X1 [Gallus gallus]
373978	47.643	18.22	-1.38592	0	0	COL18A1	NM_204164.1,XM_025152068.1	XP_021255968.1|0.0e+00|collagen alpha-1(XVIII) chain isoform X1 [Numida meleagris]
421466	1.3	0.496	-1.3886	3.88853e-21	2.97377e-21	CYP1B1	XM_015283751.2	XP_021248147.1|0.0e+00|cytochrome P450 1B1 isoform X1 [Numida meleagris]
428221	30.17	11.48	-1.38939	0	0	COL8A2	XM_425780.6	XP_425780.3|0.0e+00|PREDICTED: collagen alpha-2(VIII) chain [Gallus gallus]
419101	1.99	0.756	-1.39034	1.38441e-27	9.13692e-28	PROSER2	XM_015297326.2,BGI_novel_T000070	XP_015152812.1|1.5e-256|PREDICTED: proline and serine-rich protein 2 isoform X1 [Gallus gallus]
395760	4.076	1.55	-1.39062	1.95893e-86	6.31166e-87	SLC8A1	XM_015283436.2,XM_015283442.2,BGI_novel_T002062,XM_015283441.2,XM_015283439.2,BGI_novel_T002063,XM_015283443.2,XM_015283449.2,XM_015283448.2,NM_001079473.1,XM_015283444.2,XM_015283437.2,XM_015283446.2,XM_015283445.2,XM_015283438.2,XM_015283451.2,XM_015283447.2,BGI_novel_T002064,XM_015283450.2	XP_014820002.1|0.0e+00|PREDICTED: sodium/calcium exchanger 1 isoform X7 [Calidris pugnax]
420676	2.12	0.806	-1.39271	5.84754e-16	5.19517e-16	GGCT	XM_418776.5	XP_418776.4|4.1e-192|PREDICTED: gamma-glutamylcyclotransferase [Gallus gallus]
770406	60.703	23.016	-1.39428	0	0	FXYD6	XM_015298059.2,BGI_novel_T008521,NM_001080879.1,XM_015298061.2	XP_015739617.1|2.1e-45|PREDICTED: FXYD domain-containing ion transport regulator 6 isoform X2 [Coturnix japonica]
428181	13.356	5.17	-1.39628	2.10387e-304	2.70708e-305	SKI	XM_015296936.2,NM_001039318.1,XM_015296939.2,XM_025142546.1,XM_025142547.1	XP_015152424.1|0.0e+00|PREDICTED: ski oncogene isoform X2 [Gallus gallus]
395076	28.38	10.736	-1.39734	5.57459e-161	1.19008e-161	CDKN2B	NM_204433.1	NP_989764.1|9.4e-73|cyclin-dependent kinase 4 inhibitor B [Gallus gallus]
396010	8.476	3.216	-1.39811	6.88521e-102	2.00515e-102	LIMK2	XM_015275222.2,XM_015275223.2,XM_015275218.2,BGI_novel_T006838,NM_205115.1,BGI_novel_T006837,XM_015275217.2,XM_015275220.2,XM_015275221.2	XP_015130707.1|0.0e+00|PREDICTED: LIM domain kinase 2 isoform X4 [Gallus gallus]
423034	1.823	0.666	-1.39826	3.87885e-14	3.66543e-14	GALNT18	XM_015286373.2,NM_001199584.1,XM_025150668.1,XM_025150669.1,XM_015286372.2	OPJ73917.1|0.0e+00|polypeptide N-acetylgalactosaminyltransferase 18 [Patagioenas fasciata monilis]
421160	6.813	2.583	-1.39887	2.62972e-49	1.22939e-49	LAD1	BGI_novel_T008729,XM_015298866.2,XM_025143836.1	XP_015154352.1|4.7e-225|PREDICTED: ladinin-1 [Gallus gallus]
107053378	1.053	0.396	-1.40109	0.000353895	0.000579244	ASCL3	XM_015286479.2	XP_015141965.1|6.5e-101|PREDICTED: achaete-scute homolog 3 [Gallus gallus]
420317	23.943	9.07	-1.40185	1.13549e-141	2.64831e-142	KHDRBS3	XM_004940056.3,XM_001231271.5,XM_418427.6	XP_418427.1|8.2e-224|PREDICTED: KH domain-containing, RNA-binding, signal transduction-associated protein 3 isoform X1 [Gallus gallus]
424185	2.53	0.953	-1.40641	8.58943e-32	5.21897e-32	IFIH1	NM_001193638.1	AEM00325.1|0.0e+00|interferon-induced helicase C domain-containing protein 1 [Gallus gallus]
771760	0.11	0.04	-1.40849	0.000821352	0.00139371	PPM1H	XM_004937558.3,XM_015282711.2,XM_003640351.4	XP_003640399.3|5.3e-298|PREDICTED: protein phosphatase 1H isoform X1 [Gallus gallus]
418151	66.846	25.04	-1.4104	0	0	NINJ2	XM_015286843.2	XP_015142329.1|4.7e-86|PREDICTED: ninjurin-2 [Gallus gallus]
418784	27.45	10.14	-1.41273	0	0	MBNL2	XM_025150239.1,XM_015274443.2,XM_015274431.2,XM_015274436.2,NM_001163376.1,XM_015274420.2,NM_001163372.1,XM_015274440.2,NM_001163373.1,BGI_novel_T000898,XM_015274411.2,BGI_novel_T000895,XM_015274401.2,BGI_novel_T000899,NM_001163374.1,BGI_novel_T000896,XM_015274425.2,NM_001163375.1,NM_001163371.1,XM_015274385.2,NM_001081700.2,XM_025150245.1,BGI_novel_T000900,XM_025150237.1,XM_015274392.2,BGI_novel…	XP_015129868.1|4.7e-236|PREDICTED: muscleblind-like protein 2 isoform X1 [Gallus gallus]
418397	1.523	0.51	-1.41678	1.28048e-08	1.53342e-08	TRMT10C	XM_015297190.2,XM_015297198.2,XM_015297202.2	XP_015152676.1|1.3e-239|PREDICTED: mitochondrial ribonuclease P protein 1 [Gallus gallus]
422557	4.876	1.826	-1.41754	7.88791e-171	1.6167e-171	TENM3	BGI_novel_T002897,BGI_novel_T002900,BGI_novel_T002898,BGI_novel_T002899,NM_001198537.2,BGI_novel_T002896	XP_016863874.1|0.0e+00|PREDICTED: teneurin-3 isoform X1 [Homo sapiens]
769490	0.613	0.23	-1.4178	1.60178e-09	1.83529e-09	HS3ST3B1	XM_015295254.2	XP_015150740.1|1.4e-230|PREDICTED: heparan sulfate glucosamine 3-O-sulfotransferase 3A1 [Gallus gallus]
BGI_novel_G000097	3.306	1.24	-1.41785	1.59317e-118	4.20258e-119	BGI_novel_G000097	BGI_novel_T003334
424568	0.6	0.216	-1.41938	1.21716e-29	7.72699e-30	PTPRF	XM_025153101.1,XM_025153098.1,XM_025153105.1,BGI_novel_T004906,XM_025153102.1,XM_025153103.1,XM_015291316.2,XM_015291317.2,XM_025153099.1,XM_025153104.1,BGI_novel_T004905,XM_015291315.2,XM_025153095.1,XM_015291314.2,BGI_novel_T004904,XM_025153096.1,XM_015291308.2,XM_025153097.1,XM_025153100.1	XP_021383808.1|0.0e+00|receptor-type tyrosine-protein phosphatase F isoform X14 [Lonchura striata domestica]
107055169	0.473	0.18	-1.41955	1.73318e-12	1.7459e-12	LOC107055169	XM_015298966.2	XP_015154452.1|2.1e-189|PREDICTED: uncharacterized protein LOC107055169 [Gallus gallus]
417513	5.276	2.023	-1.42113	1.20129e-52	5.35632e-53	RASA4	XM_025141941.1,BGI_novel_T007570,NM_001291781.1,BGI_novel_T007569	NP_001278710.1|0.0e+00|ras GTPase-activating protein 4 [Gallus gallus]
100857260	36.616	13.696	-1.42253	0	0	PEAK1	XM_015278736.2,BGI_novel_T005434,XM_015278735.2,XM_015278737.2,NM_001257259.1,BGI_novel_T005431,XM_015278742.2,XM_015278738.2,BGI_novel_T005432,XM_015278740.2,XM_015278734.2,XM_015278739.2,BGI_novel_T005433	XP_015134220.1|0.0e+00|PREDICTED: pseudopodium-enriched atypical kinase 1 isoform X1 [Gallus gallus]
107055527	0.573	0.213	-1.42376	1.76723e-09	2.0289e-09	LOC107055527	XM_025146876.1,XM_025146875.1,XM_025146878.1	XP_015156199.1|2.4e-233|PREDICTED: serine/arginine repetitive matrix protein 1-like isoform X4 [Gallus gallus]
420989	9.996	3.693	-1.42411	1.90513e-296	2.51868e-297	AHRR	XM_015282378.2,XM_025147282.1,NM_001201387.1	NP_001188316.1|0.0e+00|aryl hydrocarbon receptor repressor [Gallus gallus]
429052	0.54	0.2	-1.42756	1.68678e-06	2.29382e-06	CYTIP	XM_025152505.1,XM_426609.5	XP_426609.3|1.1e-234|PREDICTED: cytohesin-interacting protein isoform X1 [Gallus gallus]
769665	254.163	94.186	-1.42793	0	0	CHAD	XM_001232035.5,XM_004946334.3	XP_001232036.1|3.7e-208|PREDICTED: chondroadherin [Gallus gallus]
422234	280.703	104.216	-1.42948	0	0	GPC4	XM_015278449.2	XP_015133935.1|0.0e+00|PREDICTED: glypican-4 [Gallus gallus]
100857874	0.113	0.043	-1.43023	0.000393472	0.000647704	RNF43	XM_003642379.4,XM_025142103.1	XP_003642427.3|0.0e+00|PREDICTED: E3 ubiquitin-protein ligase RNF43 [Gallus gallus]
428616	0.21	0.076	-1.43023	5.58089e-08	6.93044e-08	CLVS2	XM_426173.6	XP_426173.3|2.5e-187|PREDICTED: clavesin-2 [Gallus gallus]
420687	0.796	0.313	-1.43023	1.05166e-06	1.4098e-06	CPNE4	XM_025147494.1,XM_418786.6,XM_015281755.2,XM_025147493.1	XP_013913950.1|0.0e+00|PREDICTED: copine-4 isoform X1 [Thamnophis sirtalis]
771333	0.136	0.05	-1.43023	1.05166e-06	1.4098e-06	SAMD7	XM_015291732.2,XM_025153600.1	XP_015147218.1|0.0e+00|PREDICTED: sterile alpha motif domain-containing protein 7 [Gallus gallus]
423905	5.61	2.09	-1.43088	7.96221e-123	2.04736e-123	CCDC186	XM_015288957.2,XM_004942290.3,XM_015288955.2,XM_015288956.2,XM_015288958.2,XM_015288959.2	XP_004942347.1|0.0e+00|PREDICTED: coiled-coil domain-containing protein 186 [Gallus gallus]
770263	13.52	4.973	-1.43181	1.9636e-52	8.77983e-53	SLC10A4	XM_001233593.5	XP_001233594.2|8.2e-206|PREDICTED: sodium/bile acid cotransporter 4 [Gallus gallus]
427211	18.9	6.963	-1.43462	0	0	IQGAP2	XM_015277324.2,BGI_novel_T009394,BGI_novel_T009395,NM_001277778.1,XM_015277323.2,BGI_novel_T009393,XM_015277322.2,XM_015277326.2,XM_015277320.2,BGI_novel_T009391,XM_015277321.2,BGI_novel_T009392,BGI_novel_T009396,XM_015277325.2	XP_015132811.1|0.0e+00|PREDICTED: ras GTPase-activating-like protein IQGAP2 isoform X6 [Gallus gallus]
395133	30.103	11.106	-1.43479	8.04667e-226	1.33311e-226	SGK1	XM_025148494.1,NM_204476.1,XM_015284007.2,XM_015284008.2	XP_009279767.2|3.0e-246|PREDICTED: LOW QUALITY PROTEIN: serine/threonine-protein kinase Sgk1 [Aptenodytes forsteri]
769120	0.393	0.146	-1.43504	0.000243097	0.000392133	GCNT7	XM_001231952.4,XM_015296534.2,XM_015296535.2	XP_004947283.1|7.1e-261|PREDICTED: beta-1,3-galactosyl-O-glycosyl-glycoprotein beta-1,6-N-acetylglucosaminyltransferase 7 [Gallus gallus]
421703	32.43	12.02	-1.43726	0	0	EPB41L2	BGI_novel_T002321,XM_025148931.1	XP_015139636.1|0.0e+00|PREDICTED: band 4.1-like protein 2 isoform X7 [Gallus gallus]
419346	2.95	1.093	-1.4403	2.25418e-76	7.81584e-77	NFATC2	XM_004947256.3,XM_004947259.3,XM_015296517.2,XM_025142327.1,BGI_novel_T007927,XM_417509.5,BGI_novel_T007926,XM_004947255.3	XP_015737567.1|0.0e+00|PREDICTED: nuclear factor of activated T-cells, cytoplasmic 2 [Coturnix japonica]
101752246	0.356	0.13	-1.4405	1.10855e-10	1.20817e-10	CBX7	XM_004937742.3,XM_015288700.2,XM_015288698.2	XP_015144184.1|1.0e-136|PREDICTED: chromobox protein homolog 7 isoform X2 [Gallus gallus]
395682	6.11	2.23	-1.44491	1.34829e-286	1.83857e-287	ZFHX3	XM_025154147.1,XM_015292547.2,NM_001293088.1,XM_025154148.1,XM_025154150.1,BGI_novel_T005843,XM_025154149.1	NP_001280017.1|0.0e+00|zinc finger homeobox protein 3 [Gallus gallus]
100857251	5.986	2.19	-1.44749	1.65623e-56	7.05089e-57	MTMR11	BGI_novel_T008620,XM_025143529.1	XP_015153837.1|0.0e+00|PREDICTED: myotubularin-related protein 11 isoform X1 [Gallus gallus]
421570	1.386	0.473	-1.45099	1.35703e-14	1.26092e-14	RPS6KA2	XM_025149054.1,XM_419611.5,BGI_novel_T002247	XP_010705389.1|0.0e+00|PREDICTED: ribosomal protein S6 kinase alpha-2 [Meleagris gallopavo]
428797	0.33	0.12	-1.45233	7.09399e-17	6.11971e-17	SORCS2	XM_025150307.1	XP_015141352.1|0.0e+00|PREDICTED: VPS10 domain-containing receptor SorCS2 [Gallus gallus]
422555	10.803	3.936	-1.45379	2.78657e-215	4.83669e-216	WWC2	XM_025149946.1,XM_015276544.2	XP_015132030.1|0.0e+00|PREDICTED: protein WWC2 [Gallus gallus]
423037	1.4	0.526	-1.45902	3.73725e-26	2.54422e-26	MRVI1	BGI_novel_T003395,BGI_novel_T003388,BGI_novel_T003398,BGI_novel_T003393,BGI_novel_T003400,BGI_novel_T003389,XM_015286444.2,XM_015286454.2,XM_025151228.1,XM_015286455.2,XM_015286456.2,XM_015286449.2,XM_015286451.2,BGI_novel_T003392,XM_004941372.3,XM_025151229.1,XM_015286458.2,XM_004941368.3,XM_015286446.2,XM_004941375.3,BGI_novel_T003399,BGI_novel_T003394,XM_015286442.2,XM_015286448.2,XM_015286439…	XP_004941425.1|0.0e+00|PREDICTED: protein MRVI1 isoform X1 [Gallus gallus]
421502	2.313	0.836	-1.4591	1.60435e-19	1.2843e-19	LOC421502	XM_429858.5,XM_015283966.2,XM_004935456.3,XM_004935457.3	XP_004935513.1|2.6e-216|PREDICTED: uncharacterized protein LOC421502 isoform X1 [Gallus gallus]
420383	3.773	1.383	-1.45971	1.19717e-87	3.81745e-88	FAM188B	BGI_novel_T001168,XM_418488.6	XP_418488.4|0.0e+00|PREDICTED: protein FAM188B isoform X1 [Gallus gallus]
416101	1.316	0.456	-1.46266	4.48884e-31	2.76756e-31	CNTN3	XM_414433.5,BGI_novel_T006124,XM_015293227.1,BGI_novel_T006123,XM_015293226.2,XM_015293225.2	XP_010122543.1|0.0e+00|PREDICTED: contactin-3-like, partial [Chlamydotis macqueenii]
421216	43.57	15.773	-1.46436	0	0	SPTBN1	XM_015283350.2,NM_001199425.1,XM_015283351.2,XM_015283353.1	XP_009981168.1|0.0e+00|PREDICTED: spectrin beta chain, non-erythrocytic 1 isoform X2 [Tauraco erythrolophus]
395209	12.616	4.546	-1.46526	1.56462e-46	7.65286e-47	RARRES1	NM_204534.4	NP_989865.1|1.8e-162|ovocalyxin-32 precursor [Gallus gallus]
424987	35.006	12.646	-1.46886	0	0	TNIK	XM_025153741.1,XM_015291719.2,XM_015291716.2,BGI_novel_T005327,BGI_novel_T005328,XM_025153743.1,XM_015291718.2,XM_025153742.1,XM_025153740.1,XM_025153737.1,XM_025153744.1,XM_025153739.1,XM_025153738.1	XP_015147205.1|0.0e+00|PREDICTED: TRAF2 and NCK-interacting protein kinase isoform X5 [Gallus gallus]
422321	2.916	1.05	-1.47261	5.77138e-32	3.49232e-32	RASL11AL	XM_420297.6	XP_420297.1|4.8e-138|PREDICTED: ras-like protein family member 11A-like [Gallus gallus]
428431	1.036	0.37	-1.47716	8.16212e-14	7.78937e-14	GPNMB	XM_425991.5	XP_425991.2|0.0e+00|PREDICTED: transmembrane glycoprotein NMB [Gallus gallus]
424054	2.23	0.81	-1.47965	4.66884e-47	2.27003e-47	PGAP1	XM_015289490.2,XM_025152511.1	XP_015144976.1|0.0e+00|PREDICTED: GPI inositol-deacylase [Gallus gallus]
101751647	0.45	0.23	-1.48017	3.62913e-05	5.40637e-05	GIMAP7L5	XM_025147399.1,XM_015281191.2,XM_015281194.2,XM_015281192.1,XM_025147398.1,XM_015281196.2,XM_418486.6,XM_004939037.3	XP_004939094.1|1.8e-182|PREDICTED: GTPase IMAP family member 7-like isoform X1 [Gallus gallus]
419530	15.94	5.706	-1.4818	3.1501e-194	5.95879e-195	SLC25A37	XM_417682.5	XP_417682.2|1.3e-195|PREDICTED: mitoferrin-1 isoform X1 [Gallus gallus]
419231	7.033	2.576	-1.48273	8.59271e-114	2.32023e-114	SLCO4A1	BGI_novel_T007844,NM_001278151.1,XM_015296380.2	XP_015151866.1|0.0e+00|PREDICTED: solute carrier organic anion transporter family member 4A1 isoform X1 [Gallus gallus]
431608	1.84	0.656	-1.48365	3.07695e-24	2.18873e-24	SMC5	NM_001039335.2	XP_015135804.1|0.0e+00|PREDICTED: structural maintenance of chromosomes protein 5 isoform X1 [Gallus gallus]
420963	0.396	0.143	-1.4845	1.43399e-13	1.38013e-13	PTPN3	XM_419047.6,XM_015282340.2,BGI_novel_T001591,XM_025147768.1,BGI_novel_T001589,XM_015282343.2,BGI_novel_T001590,XM_015282341.2,XM_015282342.2	XP_015137826.1|0.0e+00|PREDICTED: tyrosine-protein phosphatase non-receptor type 3 isoform X1 [Gallus gallus]
423069	0.376	0.07	-1.48762	4.87682e-10	5.45496e-10	PLEKHA7	XM_015286639.2,XM_015286636.2,XM_025151076.1,XM_025151079.1,XM_025151080.1,XM_025151077.1,XM_025151078.1,XM_015286638.2,XM_015286637.2,XM_015286632.2,XM_015286640.2,BGI_novel_T003424,BGI_novel_T003423,XM_025151075.1	XP_015142118.1|0.0e+00|PREDICTED: pleckstrin homology domain-containing family A member 7 isoform X1 [Gallus gallus]
BGI_novel_G000298	2.666	0.95	-1.49001	4.61107e-29	2.95123e-29	BGI_novel_G000298	BGI_novel_T010084
BGI_novel_G000089	7.183	2.553	-1.49153	4.17863e-246	6.47117e-247	BGI_novel_G000089	BGI_novel_T002980
426454	11.693	4.16	-1.49292	1.35712e-177	2.70257e-178	GPR155	XM_004942730.3,BGI_novel_T004485,XM_015289601.2,BGI_novel_T004484,XM_015289600.2,XM_004942729.3,BGI_novel_T004482,XM_015289598.2,XM_015289599.2,BGI_novel_T004483,XM_025152306.1,XM_424099.6	XP_424099.4|0.0e+00|PREDICTED: integral membrane protein GPR155 isoform X1 [Gallus gallus]
420453	5.486	2	-1.49411	3.05771e-61	1.22227e-61	VIPR2	BGI_novel_T001244,NM_001014970.1,BGI_novel_T001243	NP_001014970.1|3.6e-262|vasoactive intestinal polypeptide receptor 2 precursor [Gallus gallus]
428001	1.2	0.43	-1.49595	2.79585e-43	1.43201e-43	CDKL5	XM_025146581.1,XM_015272927.2,XM_015272906.2,XM_015272909.2,XM_015272901.2,XM_025146582.1,XM_015272933.2,XM_015272914.2,XM_015272919.2,XM_015272943.2	XP_015128429.1|0.0e+00|PREDICTED: cyclin-dependent kinase-like 5 isoform X4 [Gallus gallus]
100858888	0.726	0.26	-1.50062	2.63043e-14	2.46984e-14	CLDN22	XM_015276546.2	XP_015132032.1|9.7e-125|PREDICTED: claudin-22-like [Gallus gallus]
374007	0.4	0.14	-1.50062	1.67608e-05	2.44095e-05	CDH7	NM_204187.2	XP_017509509.1|0.0e+00|PREDICTED: cadherin-7 isoform X1 [Manis javanica]
395201	4.406	1.523	-1.50062	2.67472e-25	1.85479e-25	SH3GL3	NM_204528.1,XM_015291974.2	XP_010715758.1|7.8e-191|PREDICTED: endophilin-A3 [Meleagris gallopavo]
423428	0.106	0.036	-1.50062	0.000183208	0.000291666	ASB2	XM_025151074.1,XM_015287760.2,XM_015287761.2	XP_421337.1|0.0e+00|PREDICTED: ankyrin repeat and SOCS box protein 2 [Gallus gallus]
424872	3.2	1.14	-1.50062	2.03786e-32	1.22381e-32	DZIP1L	XM_422684.6,XM_004936987.3,XM_015277142.2	XP_422684.3|7.0e-265|PREDICTED: zinc finger protein DZIP1L isoform X1 [Gallus gallus]
421862	8.7	3.066	-1.50518	0	0	CD109	XM_419879.6	XP_419879.4|0.0e+00|PREDICTED: CD109 antigen [Gallus gallus]
416074	0.073	0.026	-1.50585	0.000298596	0.00048563	FEZF2	XM_414411.5	ADK13096.1|1.6e-97|Fez family zinc finger protein [Branchiostoma lanceolatum]
771022	83.19	28.953	-1.51001	3.17825e-223	5.33155e-224	SVIP	NM_001302192.1	NP_001289121.1|1.0e-37|small VCP/p97-interacting protein [Gallus gallus]
BGI_novel_G000110	2.063	0.72	-1.51106	2.53321e-08	3.09207e-08	BGI_novel_G000110	BGI_novel_T004018
426315	4.023	1.5	-1.51197	1.9001e-45	9.43593e-46	ZC3HAV1	BGI_novel_T000435,XM_015290625.2,BGI_novel_T000438,XM_015290630.2,XM_015290611.2,XM_025150957.1,BGI_novel_T000436,XM_015290600.2,XM_015290617.2,XM_015290605.2,XM_025150955.1,BGI_novel_T000437,NM_001012938.1	NP_001012956.1|0.0e+00|zinc finger CCCH-type antiviral protein 1 [Gallus gallus]
417327	24.363	8.51	-1.51376	9.0955e-161	1.94362e-161	PMP22	NM_001277071.1,NM_001277072.1	NP_001264001.1|4.2e-84|peripheral myelin protein 22 [Gallus gallus]
101750125	0.383	0.136	-1.51625	1.19692e-33	7.03615e-34	LOC101750125	XM_025149280.1	XP_015139265.1|1.6e-201|PREDICTED: uncharacterized protein LOC101750125 [Gallus gallus]
373917	27.146	9.17	-1.5176	8.68264e-108	2.43115e-108	LGALS3	BGI_novel_T003885,BGI_novel_T003884,NM_001302800.1,BGI_novel_T003883,XM_015287256.2	XP_015142742.1|3.6e-138|PREDICTED: galectin-3 isoform X1 [Gallus gallus]
107049800	4.35	1.513	-1.51818	5.13034e-53	2.28219e-53	LOC107049800	XM_025142804.1,BGI_novel_T008133	XP_015129085.1|3.1e-244|PREDICTED: actin filament-associated protein 1-like 2, partial [Gallus gallus]
423901	1.94	0.69	-1.51973	1.89081e-17	1.60087e-17	CASP7	XM_025151846.1,XM_421764.5,XM_025151842.1,XM_025151843.1,XM_025151845.1,XM_025151844.1	XP_013156098.1|8.1e-159|PREDICTED: caspase-7 isoform X2 [Falco peregrinus]
420978	2.83	0.983	-1.521	3.20693e-36	1.82189e-36	GALNT12	XM_015282397.2,XM_015282396.2	XP_015137882.1|0.0e+00|PREDICTED: polypeptide N-acetylgalactosaminyltransferase 12 isoform X1 [Gallus gallus]
415464	2.11	0.736	-1.52427	2.6239e-27	1.74374e-27	LMINA	XM_015292031.2,XM_015292030.2	XP_015147516.1|0.0e+00|PREDICTED: lamin-L(III)-like isoform X1 [Gallus gallus]
419724	1.58	0.55	-1.53084	1.33477e-55	5.75448e-56	ARHGAP32	XM_004947963.3,BGI_novel_T008439,BGI_novel_T008435,XM_025143332.1,BGI_novel_T008441,XM_025143334.1,BGI_novel_T008437,BGI_novel_T008440,XM_025143335.1,BGI_novel_T008438,XM_025143340.1,XM_025143331.1,XM_025143333.1,XM_025143338.1,XM_025143330.1,XM_025143337.1,BGI_novel_T008436,XM_025143339.1	XP_004948020.2|0.0e+00|PREDICTED: LOW QUALITY PROTEIN: rho GTPase-activating protein 32 [Gallus gallus]
424819	13.566	4.696	-1.53135	0	0	CLSTN2	BGI_novel_T005166,XM_015277049.2	XP_015132535.1|0.0e+00|PREDICTED: calsyntenin-2 isoform X1 [Gallus gallus]
424807	0.793	0.29	-1.53233	7.70053e-05	0.000118084	AP1S3	XM_015276903.2,XM_015276905.2,NM_001030008.1,XM_015276902.2,XM_015276904.2	XP_015132390.1|2.9e-92|PREDICTED: AP-1 complex subunit sigma-3 isoform X3 [Gallus gallus]
BGI_novel_G000136	0.21	0.07	-1.53418	4.24382e-08	5.23564e-08	BGI_novel_G000136	BGI_novel_T005577
417761	0.33	0.103	-1.53457	1.07916e-07	1.36479e-07	CPED1	XM_004937531.3,XM_416005.5,XM_025154021.1,XM_025154020.1	XP_416005.3|0.0e+00|PREDICTED: cadherin-like and PC-esterase domain-containing protein 1 isoform X1 [Gallus gallus]
395762	32.266	11.176	-1.53484	0	0	PPP1R9B	BGI_novel_T004496,NM_204923.3,BGI_novel_T004495	NP_990254.3|0.0e+00|protein phosphatase 1, regulatory (inhibitor) subunit 9B [Gallus gallus]
771624	97.533	35.453	-1.53701	0	0	C12orf75	NM_001145200.1,XM_015286075.2,XM_025151721.1,XM_015286078.2	XP_015141564.1|2.2e-39|PREDICTED: overexpressed in colon carcinoma 1 protein homolog isoform X3 [Gallus gallus]
420640	20.54	6.983	-1.53753	0	0	ANKRD28	XM_004939388.3,XM_015281816.2	XP_015137302.1|0.0e+00|PREDICTED: serine/threonine-protein phosphatase 6 regulatory ankyrin repeat subunit A isoform X2 [Gallus gallus]
417766	0.706	0.243	-1.54015	9.93935e-15	9.19411e-15	CTTNBP2	NM_001098539.1	XP_015709012.1|0.0e+00|PREDICTED: LOW QUALITY PROTEIN: cortactin-binding protein 2 [Coturnix japonica]
418395	1.293	0.46	-1.54015	1.68833e-09	1.93621e-09	FAM172BP	XM_003640459.4,XM_015297212.2,XM_003640460.3	XP_003640507.1|7.8e-218|PREDICTED: putative protein FAM172B [Gallus gallus]
424779	2.683	0.92	-1.54089	9.30245e-25	6.54171e-25	GK5	NM_001031306.1	NP_001026477.1|2.5e-307|putative glycerol kinase 5 [Gallus gallus]
100859853	63.703	21.753	-1.54092	8.07606e-222	1.36148e-222	GADD45B	XM_015299957.2	XP_015155443.1|1.3e-82|PREDICTED: growth arrest and DNA damage-inducible protein GADD45 beta [Gallus gallus]
419011	7.18	2.463	-1.5417	1.14131e-89	3.59188e-90	FOLH1	XM_417205.6	OXB55449.1|0.0e+00|hypothetical protein ASZ78_014894 [Callipepla squamata]
422875	2.876	0.986	-1.5421	1.42466e-36	8.04326e-37	DOK7	XM_420818.6,XM_004936196.3	XP_004936253.2|0.0e+00|PREDICTED: protein Dok-7 isoform X1 [Gallus gallus]
427050	3.903	1.333	-1.54227	2.61638e-161	5.5692e-162	VPS13A	XM_015280270.2,NM_001277836.1,XM_015280272.2,XM_015280271.2	NP_001264765.1|0.0e+00|vacuolar protein sorting-associated protein 13A [Gallus gallus]
428385	12.41	4.246	-1.54366	6.23196e-288	8.47217e-289	ASAP1	XM_025148173.1,XM_015283133.2,BGI_novel_T001880,XM_025148174.1,XM_425945.6,XM_015283134.2,XM_025148172.1,XM_015283135.2,XM_025148176.1,XM_025148171.1,XM_025148175.1,XM_025148177.1,XM_025148178.1	XP_021242211.1|0.0e+00|arf-GAP with SH3 domain, ANK repeat and PH domain-containing protein 1 isoform X3 [Numida meleagris]
100859181	0.326	0.113	-1.54369	0.000525824	0.000874753	PRKACA	XM_015285019.2,XM_015285017.2,XM_025149111.1,XM_025149113.1	XP_015715117.1|0.0e+00|PREDICTED: cGMP-dependent protein kinase 1-like [Coturnix japonica]
396424	18.81	6.45	-1.54399	6.65991e-157	1.44946e-157	PLAU	NM_205443.2	NP_990774.2|7.9e-271|urokinase-type plasminogen activator preproprotein [Gallus gallus]
395527	13.02	4.42	-1.54502	9.69503e-37	5.45543e-37	CD9	NM_204762.1	NP_990093.1|1.3e-125|CD9 antigen [Gallus gallus]
417886	2.3	0.75	-1.54611	7.81844e-55	3.39996e-55	C1H12orf29	XM_025154623.1,XM_025154625.1,XM_025154616.1	XP_416129.2|2.6e-194|PREDICTED: uncharacterized protein C12orf29 homolog isoform X1 [Gallus gallus]
404536	32.5	11.073	-1.54644	3.22773e-201	5.91776e-202	ADIPOQ	XM_015276846.2,NM_206991.1	XP_006123489.1|3.6e-47|PREDICTED: otolin-1 isoform X1 [Pelodiscus sinensis]
396491	4379.82	1472.4	-1.54653	0	0	LGALS1	NM_205495.1	NP_990826.1|4.5e-75|beta-galactoside-binding lectin [Gallus gallus]
396244	0.546	0.186	-1.55038	7.70337e-06	1.09321e-05	MYB	NM_205306.1	NP_990637.1|0.0e+00|transcriptional activator Myb [Gallus gallus]
448832	4.243	1.446	-1.55083	4.47678e-37	2.50607e-37	MCAM	BGI_novel_T008491,NM_001004768.1	NP_001004768.1|0.0e+00|cell surface glycoprotein MUC18 precursor [Gallus gallus]
395816	14.53	4.956	-1.55155	3.75827e-135	9.03886e-136	PLA2G7	XM_015285090.2,BGI_novel_T002522,NM_204969.1,BGI_novel_T002523	XP_021248715.1|1.1e-254|platelet-activating factor acetylhydrolase isoform X1 [Numida meleagris]
424027	26.416	9.003	-1.55234	0	0	SH3BP4	XM_421882.6,XM_004942501.3,BGI_novel_T004351	XP_003207410.2|0.0e+00|PREDICTED: SH3 domain-binding protein 4 [Meleagris gallopavo]
373967	0.98	0.336	-1.55258	7.12634e-24	5.11363e-24	SLIT2	BGI_novel_T003142,XM_025149451.1,BGI_novel_T003143,XM_025149454.1,XM_015285716.2,XM_025149452.1,XM_025149450.1,XM_025149453.1,XM_025149455.1,NM_001267075.1,BGI_novel_T003144	NP_001254004.1|0.0e+00|slit homolog 2 protein precursor [Gallus gallus]
421537	2.696	0.913	-1.55633	4.93876e-30	3.11272e-30	ABCB10	XM_015284389.2	XP_021245732.1|0.0e+00|ATP-binding cassette sub-family B member 10, mitochondrial [Numida meleagris]
416855	1.036	0.353	-1.5585	1.87009e-14	1.7462e-14	WDR66	XM_025155681.1	XP_415147.4|0.0e+00|PREDICTED: WD repeat-containing protein 66 [Gallus gallus]
396497	750.55	251.776	-1.56103	0	0	CST3	NM_205500.2	NP_990831.2|8.2e-79|cystatin precursor [Gallus gallus]
422264	16.1	5.45	-1.56368	0	0	PCDH11X	BGI_novel_T002646,XM_015278496.2,XM_004940702.3,XM_420249.6,XM_015278495.2	XP_019473711.1|0.0e+00|PREDICTED: protocadherin-11 X-linked isoform X3 [Meleagris gallopavo]
418180	3.613	1.22	-1.56625	9.24086e-62	3.67852e-62	RERGL	XM_416411.6,BGI_novel_T000394	XP_416411.1|3.6e-110|PREDICTED: ras-related and estrogen-regulated growth inhibitor-like protein [Gallus gallus]
417940	1.95	0.656	-1.56643	4.96178e-13	4.89402e-13	TMEM140	XM_416181.6	XP_416181.2|1.4e-120|PREDICTED: transmembrane protein 140 [Gallus gallus]
395748	15.69	5.383	-1.56675	5.7306e-242	8.95798e-243	ETV1	NM_204917.1,XM_015281296.2,XM_025147041.1,XM_025147039.1,XM_015281294.2,XM_025147040.1	XP_009929643.1|1.1e-281|PREDICTED: ETS translocation variant 1 isoform X2 [Opisthocomus hoazin]
431253	24.7	8.533	-1.56841	0	0	TACC1	XM_025142926.1,BGI_novel_T008177,XM_025142929.1,BGI_novel_T008178,XM_025142927.1,XM_025142925.1,XM_025142924.1,BGI_novel_T008176,XM_025142928.1,XM_025142930.1,BGI_novel_T008179	XP_015738627.1|1.4e-214|PREDICTED: transforming acidic coiled-coil-containing protein 1 isoform X5 [Coturnix japonica]
418078	11.806	3.97	-1.5691	2.07158e-209	3.6775e-210	ALDH1L2	XM_015287780.2,XM_416314.6	XP_010564628.1|0.0e+00|PREDICTED: mitochondrial 10-formyltetrahydrofolate dehydrogenase [Haliaeetus leucocephalus]
395736	10.396	3.51	-1.57134	4.24567e-176	8.49895e-177	NEDD9	XM_004939656.3,XM_418946.6	XP_418946.4|0.0e+00|PREDICTED: enhancer of filamentation 1 isoform X1 [Gallus gallus]
771243	6.826	2.393	-1.57215	1.86643e-80	6.27743e-81	PECAM1	XM_015279911.2,XM_025141757.1,XM_025141755.1,XM_025141756.1,XM_025141758.1,BGI_novel_T007386,XM_004946194.3,XM_025141754.1,XM_004946188.3,XM_004946198.3,XM_025141753.1,BGI_novel_T007383,XM_025141759.1,XM_015279912.2,XM_004946203.3,XM_004946193.3,BGI_novel_T007381,XM_004946199.3,BGI_novel_T007382	XP_004946256.1|0.0e+00|PREDICTED: platelet endothelial cell adhesion molecule isoform X8 [Gallus gallus]
421979	7.9	2.66	-1.57217	5.32211e-195	1.00121e-195	ITSN2	BGI_novel_T002483,BGI_novel_T002481,XM_015285035.2,XM_419989.6,XM_025149103.1,XM_015285036.2,BGI_novel_T002482,XM_015285037.2	XP_015140521.1|0.0e+00|PREDICTED: intersectin-2 isoform X1 [Gallus gallus]
424986	12.956	4.356	-1.57231	0	0	PLD1	XM_015291714.2,XM_025153470.1,XM_422793.6,XM_015291711.2,XM_015291712.1	XP_015147197.1|0.0e+00|PREDICTED: phospholipase D1 isoform X1 [Gallus gallus]
418476	0.536	0.18	-1.57277	0.000134576	0.000211654	JAM2	NM_001006257.1,XM_015299112.2,XM_025149444.1,BGI_novel_T000662	XP_015154607.1|1.2e-156|PREDICTED: junctional adhesion molecule B isoform X2 [Gallus gallus]
415846	5.73	1.906	-1.57473	7.00343e-105	1.99591e-105	CBFA2T3	XM_025154190.1,NM_001030580.1,XM_025154189.1,XM_025154192.1,XM_025154193.1,XM_025154191.1	XP_021264408.1|0.0e+00|protein CBFA2T3 isoform X2 [Numida meleagris]
425485	1.873	0.63	-1.57476	4.74046e-83	1.57171e-83	SFMBT2	BGI_novel_T000064,XM_025153318.1	XP_015145946.1|0.0e+00|PREDICTED: scm-like with four MBT domains protein 2 isoform X1 [Gallus gallus]
418219	182.573	61.093	-1.57815	0	0	PPFIBP1	XM_025149012.1,XM_025148998.1,XM_015290341.1,XM_025148981.1,BGI_novel_T000418,XM_015290335.1,XM_025148997.1,XM_025148994.1,XM_015290406.1,XM_025149006.1,XM_015290333.1,BGI_novel_T000417,XM_025148991.1,NM_001030771.1,XM_025148984.1,BGI_novel_T000416,XM_015290411.2,XM_015290398.1,XM_025148974.1,XM_025148995.1,XM_025149025.1,XM_015290421.2,XM_025148986.1,XM_025148992.1,XM_015290418.2	XP_015145904.1|0.0e+00|PREDICTED: liprin-beta-1 isoform X18 [Gallus gallus]
423315	0.143	0.043	-1.57863	0.000217344	0.000348604	NPAS3	XM_015287648.1,XM_015287645.2,XM_015287647.2,XM_015287646.2,XM_025151281.1	AGQ45473.1|0.0e+00|neuronal PAS domain protein 3 isoform 2 [Gallus gallus]
415587	1.536	0.503	-1.5804	4.65678e-35	2.67944e-35	PPIP5K1	XM_015292148.2,BGI_novel_T005637,XM_015292152.2,XM_015292150.2,XM_004943988.3,XM_015292149.2,XM_015292155.2,XM_015292144.2,XM_015292154.2,BGI_novel_T005638,XM_015292147.2,XM_015292145.2,BGI_novel_T005639,XM_004943989.3,XM_015292151.2,XM_015292153.2	XP_015147639.1|0.0e+00|PREDICTED: inositol hexakisphosphate and diphosphoinositol-pentakisphosphate kinase 1 isoform X7 [Gallus gallus]
415953	62.17	20.776	-1.58054	0	0	ECM2	XM_015293485.2,XM_414297.6,BGI_novel_T005963,BGI_novel_T005962	XP_414297.2|0.0e+00|PREDICTED: extracellular matrix protein 2 [Gallus gallus]
424996	2.473	0.783	-1.58137	1.33999e-47	6.46222e-48	LRRC34	XM_025153603.1,XM_025153606.1,BGI_novel_T005334,BGI_novel_T005335,XM_025153604.1,BGI_novel_T005331,XM_025153602.1,XM_025153605.1,BGI_novel_T005333,XM_025153607.1,XM_004943483.3,XM_025153601.1,BGI_novel_T005332	XP_004943539.1|2.8e-236|PREDICTED: leucine-rich repeat-containing protein 34 isoform X1 [Gallus gallus]
427171	0.97	0.353	-1.58192	4.29776e-23	3.13039e-23	PIK3R1	XM_015277626.2,XM_424759.6,XM_004937312.3,XM_004937311.3,XM_004937313.3	XP_010578804.1|5.7e-257|PREDICTED: phosphatidylinositol 3-kinase regulatory subunit alpha isoform X4 [Haliaeetus leucocephalus]
107051859	222.213	73.713	-1.58268	0	0	PTTG1IP	XM_015277077.2,XM_015277078.2	XP_015132564.1|8.4e-99|PREDICTED: pituitary tumor-transforming gene 1 protein-interacting protein isoform X2 [Gallus gallus]
427493	15.036	5.01	-1.58284	0	0	KLF13	XM_425065.6	XP_425065.1|7.2e-160|PREDICTED: Krueppel-like factor 13 [Gallus gallus]
421092	10.286	3.42	-1.58671	1.71886e-184	3.3479e-185	B4GALT6	NM_001031016.1	XP_015710942.1|8.0e-230|PREDICTED: beta-1,4-galactosyltransferase 6 [Coturnix japonica]
776127	28.136	9.43	-1.58782	0	0	ADSSL1	XM_001235679.5,BGI_novel_T003839	XP_001235680.4|1.2e-268|PREDICTED: adenylosuccinate synthetase isozyme 1 [Gallus gallus]
426120	9.726	3.236	-1.58836	5.67508e-294	7.56174e-295	PARD3B	XM_015289524.2	XP_015145010.1|0.0e+00|PREDICTED: partitioning defective 3 homolog B [Gallus gallus]
417504	0.36	0.116	-1.59082	5.49083e-09	6.45108e-09	COL26A1	XM_015295990.2,XM_015295988.2,XM_004946472.3,XM_015295989.2,XM_015295987.2,XM_015295993.2,XM_015295986.2,XM_015295991.2	KFP88846.1|4.3e-46|Collagen alpha-1(V) chain, partial [Apaloderma vittatum]
414838	0.553	0.18	-1.59373	3.48594e-05	5.18395e-05	CYP11A1	NM_001001756.1	NP_001001756.1|4.4e-298|cholesterol side-chain cleavage enzyme, mitochondrial [Gallus gallus]
418173	25.98	8.626	-1.59441	0	0	RERG	XM_015292067.2,XM_416404.6,XM_004937961.3	XP_009678095.1|3.9e-110|PREDICTED: ras-related and estrogen-regulated growth inhibitor [Struthio camelus australis]
426929	37.883	12.526	-1.59544	0	0	ENPP1	XM_004940218.3	XP_004940275.2|0.0e+00|PREDICTED: ectonucleotide pyrophosphatase/phosphodiesterase family member 1 [Gallus gallus]
100857777	0.433	0.143	-1.59638	7.00379e-18	5.85263e-18	PMFBP1	BGI_novel_T005845,BGI_novel_T005850,XM_025154341.1,BGI_novel_T005844,BGI_novel_T005849,XM_015292695.2,XM_025154339.1,XM_025154337.1,BGI_novel_T005851,XM_025154345.1,BGI_novel_T005847,XM_015292697.2,BGI_novel_T005848,XM_025154336.1,XM_003641952.4,XM_025154338.1,XM_015292696.2,BGI_novel_T005846,XM_025154343.1,BGI_novel_T005852,XM_025154340.1,XM_025154344.1,XM_025154346.1,XM_004944343.2,XM_015292698…	XP_015148180.1|0.0e+00|PREDICTED: polyamine-modulated factor 1-binding protein 1 isoform X1 [Gallus gallus]
423735	27.17	8.996	-1.59751	6.19727e-218	1.0615e-218	ADK	XM_015288216.2,XM_025151570.1,XM_025151571.1,NM_001006501.1	XP_015722016.1|1.6e-206|PREDICTED: adenosine kinase isoform X1 [Coturnix japonica]
396441	92.92	30.543	-1.59777	0	0	ELN	XM_025141925.1,BGI_novel_T007542,XM_025141915.1,XM_025141916.1,BGI_novel_T007535,XM_025141917.1,XM_025141913.1,XM_025141923.1,XM_025141909.1,BGI_novel_T007537,XM_025141907.1,XM_025141922.1,XM_025141905.1,XM_025141910.1,XM_025141914.1,BGI_novel_T007539,XM_025141904.1,BGI_novel_T007540,XM_025141908.1,BGI_novel_T007536,XM_025141921.1,XM_025141924.1,XM_025141906.1,BGI_novel_T007541,XM_025141912.1,XM_…	NP_001280036.1|0.0e+00|elastin precursor [Gallus gallus]
417417	0.773	0.26	-1.59847	3.47664e-06	4.8254e-06	MILR1	XM_004946186.3,BGI_novel_T007385,BGI_novel_T007384,XM_025141780.1,XM_015279920.2,XM_004946185.3	XP_004946242.2|2.1e-186|PREDICTED: allergin-1 isoform X2 [Gallus gallus]
419399	1.44	0.416	-1.60012	1.1307e-19	9.00434e-20	PRKCZ	XM_004947394.3,XM_015297105.2,XM_417561.6,XM_025142631.1,XM_025142632.1	XP_417561.3|6.8e-288|PREDICTED: protein kinase C zeta type isoform X1 [Gallus gallus]
420386	0.11	0.036	-1.60016	5.60446e-05	8.49169e-05	ADCYAP1R1	XM_015281074.2,XM_015281075.2,XM_015281071.2,XM_015281076.2,XM_025147147.1,XM_015281079.2,XM_015281073.2,XM_015281068.2,XM_015281077.2,XM_015281069.2,XM_015281070.2,NM_001098606.1,XM_015281080.2,XM_015281067.2,XM_015281078.2	XP_014427745.1|5.1e-260|PREDICTED: pituitary adenylate cyclase-activating polypeptide type I receptor isoform X1 [Pelodiscus sinensis]
395687	8.376	2.753	-1.60225	2.6054e-189	5.00424e-190	LSAMP	XM_025143690.1,BGI_novel_T000548,XM_025143740.1,BGI_novel_T000549,XM_025143807.1,NM_204874.1,XM_025143710.1,XM_025143780.1,XM_025143669.1	CAB08114.1|2.0e-170|chLAMP, g11-isoform [Gallus gallus]
396189	10.496	3.506	-1.6027	1.17168e-83	3.86524e-84	VSNL1	XM_025148558.1,XM_015284955.2,XM_015284952.2,XM_025148559.1,XM_015284956.2,XM_025148561.1,XM_025148556.1,NM_205255.1,XM_025148560.1,XM_015284954.2,XM_025148557.1,XM_015284953.2	KFO22232.1|1.2e-107|Visinin-like protein 1 [Fukomys damarensis]
419667	2.633	0.796	-1.60633	1.77128e-15	1.59761e-15	FNDC5	NM_001318986.1,BGI_novel_T008368,XM_015297864.2	XP_015153350.1|1.3e-104|PREDICTED: fibronectin type III domain-containing protein 5 isoform X2 [Gallus gallus]
424468	4.343	1.42	-1.60701	3.87391e-49	1.81427e-49	RTCA	XM_422311.4,BGI_novel_T004816	XP_422311.1|6.5e-205|PREDICTED: RNA 3'-terminal phosphate cyclase [Gallus gallus]
395581	0.286	0.146	-1.60754	9.00418e-05	0.000139273	HTR2B	XM_025153310.1,NM_001290547.1	NP_001277476.1|8.9e-266|5-hydroxytryptamine receptor 2B [Gallus gallus]
429710	115.43	37.77	-1.60813	0	0	JUP	NM_001267553.1	NP_001254482.1|0.0e+00|junction plakoglobin [Gallus gallus]
423494	4.163	1.36	-1.60993	1.49152e-238	2.36252e-239	CEP170B	XM_015287864.2,XM_015287869.2,XM_015287858.2,BGI_novel_T003843,XM_015287861.2,XM_015287870.2,BGI_novel_T003846,XM_015287862.2,XM_015287868.2,XM_015287867.2,XM_015287860.2,XM_015287865.2,XM_015287863.2,BGI_novel_T003844,BGI_novel_T003842,XM_015287866.2,BGI_novel_T003845,XM_015287859.2	XP_015143345.1|0.0e+00|PREDICTED: centrosomal protein of 170 kDa protein B isoform X2 [Gallus gallus]
396246	44.366	14.35	-1.6107	5.37189e-102	1.5622e-102	FABP7	NM_205308.2	XP_015714234.1|3.6e-70|PREDICTED: fatty acid-binding protein, brain [Coturnix japonica]
107049066	1.483	0.483	-1.61428	1.24027e-16	1.07457e-16	LOC107049066	XM_015280944.2,XM_015280945.2	OXB53146.1|6.6e-181|hypothetical protein ASZ78_004407 [Callipepla squamata]
769726	37.39	12.166	-1.61528	0	0	LOC769726	XM_001231916.5	XP_001231917.1|1.2e-178|PREDICTED: kazal-type serine protease inhibitor domain-containing protein 1-like [Gallus gallus]
771503	1.813	0.59	-1.61536	2.99228e-38	1.64831e-38	CERS6	XM_025152632.1,XM_025152631.1	XP_001233814.3|1.0e-249|PREDICTED: ceramide synthase 6 [Gallus gallus]
419012	3.496	1.14	-1.61547	2.04547e-173	4.14138e-174	NOX4	XM_015280045.2,BGI_novel_T001069,BGI_novel_T001070,XM_015280040.2,NM_001101829.1	NP_001095299.1|0.0e+00|NADPH oxidase 4 [Gallus gallus]
395167	0.043	0.013	-1.6161	0.000144977	0.000228736	FAT3	XM_015279849.2,XM_015279865.2,XM_015279861.2,XM_015279835.2,XM_015279853.2,XM_015279842.2,XM_015279827.2,XM_025152834.1,NM_001111323.1	NP_001104793.1|0.0e+00|protocadherin Fat 3 precursor [Gallus gallus]
395646	0.446	0.13	-1.6161	0.000144977	0.000228736	RGS20	XM_015282661.1,XM_025147032.1,NM_204842.2	XP_015138147.1|1.8e-125|PREDICTED: regulator of G-protein signaling 20 isoform X1 [Gallus gallus]
421473	0.796	0.266	-1.6161	1.76691e-13	1.70716e-13	SULT6B1	XM_025149302.1,XM_025149303.1	XP_015139234.1|1.9e-156|PREDICTED: sulfotransferase 6B1 isoform X2 [Gallus gallus]
424116	0.16	0.056	-1.6161	1.44391e-05	2.09021e-05	PDE1A	XM_015289542.2,XM_004942683.3,XM_004942686.3,XM_015289543.2,XM_004942685.3,XM_015289545.2,XM_421969.6,XM_015289547.2,XM_015289544.2,XM_025152401.1,XM_004942684.3	XP_004942741.1|0.0e+00|PREDICTED: calcium/calmodulin-dependent 3',5'-cyclic nucleotide phosphodiesterase 1A isoform X4 [Gallus gallus]
768688	83.306	27.086	-1.61828	0	0	SMOC1	XM_025151059.1,BGI_novel_T003656,XM_004941688.3,XM_015287582.2,BGI_novel_T003657,XM_025151058.1,XM_001231760.5	XP_001231761.2|7.0e-282|PREDICTED: SPARC-related modular calcium-binding protein 1 isoform X1 [Gallus gallus]
416567	7.43	2.443	-1.62265	3.31839e-98	9.90545e-99	PRKCB	XM_015294480.2,XM_015294481.1	XP_015149967.1|0.0e+00|PREDICTED: protein kinase C beta type isoform X2 [Gallus gallus]
422197	40.19	13.026	-1.62321	0	0	MPP1	NM_001007917.2	NP_001007918.1|1.7e-269|55 kDa erythrocyte membrane protein [Gallus gallus]
428566	0.22	0.063	-1.62348	3.94938e-09	4.61378e-09	SYT14	XM_004935338.3,XM_015283857.2,XM_004935339.3,XM_015283858.2,XM_015283860.2,XM_015283854.2,XM_015283855.2,XM_015283859.2	XP_015139345.1|0.0e+00|PREDICTED: synaptotagmin-14 isoform X7 [Gallus gallus]
415326	0.563	0.18	-1.62461	3.8486e-08	4.74165e-08	CPEB1	XM_004943630.3,XM_025153817.1,NM_001293219.1,XM_025153816.1,XM_025153815.1,XM_004943633.3	XP_010160270.1|5.8e-309|PREDICTED: cytoplasmic polyadenylation element-binding protein 1 isoform X1 [Eurypyga helias]
416895	0.14	0.043	-1.62615	0.000233808	0.000376226	SVOP	XM_015275518.2	XP_010718511.2|0.0e+00|PREDICTED: synaptic vesicle 2-related protein [Meleagris gallopavo]
395610	8.136	2.63	-1.63056	4.24526e-86	1.37046e-86	ANGPT2	XM_015284814.2,XM_015284813.2,NM_204817.1	NP_990148.1|6.9e-236|angiopoietin-2 [Gallus gallus]
395530	5.083	1.666	-1.63362	2.43345e-146	5.54907e-147	COL4A1	XM_015277823.2,XM_025156021.1,NM_001162399.2,XM_015277824.2	XP_015133310.1|0.0e+00|PREDICTED: collagen alpha-1(IV) chain isoform X2 [Gallus gallus]
395241	6.283	1.946	-1.63532	2.71675e-29	1.73373e-29	HOPX	XM_025149490.1,XM_015276108.2,NM_204556.1,XM_025149489.1,XM_025149491.1,XM_015276109.2,XM_025149488.1	XP_015480554.1|6.3e-41|PREDICTED: homeodomain-only protein [Parus major]
374065	11.543	3.703	-1.63754	0	0	KCNMA1	XM_015288177.2,XM_015288172.2,XM_015288170.2,XM_025151436.1,XM_025151439.1,XM_015288147.2,XM_015288169.2,XM_015288173.1,XM_015288186.2,XM_015288178.2,XM_015288181.2,XM_015288166.2,XM_025151434.1,BGI_novel_T004053,XM_015288163.2,NM_204224.1,XM_015288159.2,XM_025151440.1,XM_015288151.2,XM_015288161.2,XM_015288160.2,XM_015288150.2,XM_015288155.2,XM_015288157.2,XM_015288189.2,XM_015288171.2,XM_015288…	XP_015143648.1|0.0e+00|PREDICTED: calcium-activated potassium channel subunit alpha-1 isoform X16 [Gallus gallus]
417121	3.59	1.086	-1.63972	1.20851e-102	3.4994e-103	CNTRL	BGI_novel_T007230,BGI_novel_T007231,XM_015279432.2,XM_015279435.2,BGI_novel_T007229,XM_025156053.1,XM_015279434.2,NM_001305680.1,XM_015279433.2,BGI_novel_T007232	XP_010719338.1|0.0e+00|PREDICTED: LOW QUALITY PROTEIN: centriolin [Meleagris gallopavo]
428743	0.533	0.13	-1.64003	1.57445e-07	2.00754e-07	ETNPPL	XM_015276581.2,XM_015276582.2,XM_015276580.2	XP_015132066.1|8.8e-296|PREDICTED: ethanolamine-phosphate phospho-lyase isoform X1 [Gallus gallus]
423255	32.513	10.436	-1.64138	0	0	SIPA1L1	NM_001199690.1,BGI_novel_T003644	NP_001186619.1|0.0e+00|signal-induced proliferation-associated 1-like protein 1 [Gallus gallus]
107051576	1.776	0.556	-1.64149	6.00431e-05	9.12124e-05	GP1BB	XM_015275359.1	XP_015130845.1|1.0e-110|PREDICTED: platelet glycoprotein Ib beta chain [Gallus gallus]
112530488	0.273	0.086	-1.64232	3.16618e-05	4.69198e-05	LOC112530488	XM_025144595.1	XP_015157782.1|2.5e-52|PREDICTED: collagen alpha-2(I) chain-like [Gallus gallus]
395346	0.7	0.226	-1.64358	6.91946e-10	7.79441e-10	BCO1	NM_204635.1,XM_015292519.2	NP_989966.1|0.0e+00|beta,beta-carotene 15,15'-monooxygenase [Gallus gallus]
374024	134.103	43.883	-1.64459	0	0	TWSG1	BGI_novel_T001680,NM_204198.1,XM_025146996.1	XP_015710742.1|3.6e-140|PREDICTED: twisted gastrulation protein homolog 1 isoform X1 [Coturnix japonica]
418108	3.623	1.153	-1.64605	1.08688e-18	8.91069e-19	LOC418108	XM_416342.6	XP_416342.1|4.6e-180|PREDICTED: poly [ADP-ribose] polymerase 12 isoform X1 [Gallus gallus]
101748033	0.106	0.033	-1.65263	9.62476e-05	0.000149334	LOC101748033	XM_015277379.1	XP_015132865.1|5.5e-177|PREDICTED: translation initiation factor IF-2-like [Gallus gallus]
396102	5.573	1.786	-1.65263	2.84206e-120	7.37294e-121	LRP8	BGI_novel_T004965,NM_205186.2	NP_990517.1|0.0e+00|low-density lipoprotein receptor-related protein 8 precursor [Gallus gallus]
415726	0.503	0.156	-1.65263	9.62476e-05	0.000149334	SNX20	XM_025154161.1,XM_025154160.1,NM_001293321.1	NP_001280250.1|4.2e-184|sorting nexin 20 [Gallus gallus]
418936	0.063	0.02	-1.65263	0.000610901	0.00102302	ATP8A2	XM_025146849.1,XM_025146850.1,XM_004938791.3	XP_009684842.1|0.0e+00|PREDICTED: phospholipid-transporting ATPase IB [Struthio camelus australis]
768372	0.17	0.056	-1.65263	0.000610901	0.00102302	MYO1H	XM_025155693.1,XM_025155694.1,XM_015275508.2,XM_015275507.2,XM_015275509.2,XM_003642184.4,XM_015275506.2	XP_011588416.1|0.0e+00|PREDICTED: unconventional myosin-Ih [Aquila chrysaetos canadensis]
417862	74.416	23.523	-1.65295	0	0	GLIPR1L	NM_001030743.2	NP_001025914.2|3.6e-161|glioma pathogenesis-related protein 1-like precursor [Gallus gallus]
100858912	6.226	1.973	-1.65417	5.58418e-93	1.71564e-93	CTNNAL1	XM_003640772.4,XM_025147785.1	XP_003640820.1|0.0e+00|PREDICTED: alpha-catulin [Gallus gallus]
422222	202.623	63.663	-1.65422	0	0	PLS3	XM_015278235.2,BGI_novel_T002613,BGI_novel_T002616,XM_025149553.1,XM_015278236.2,XM_025149554.1,XM_015278234.2,BGI_novel_T002615,NM_001006431.1,BGI_novel_T002612,XM_015278233.2,XM_025149552.1,XM_015278238.2,BGI_novel_T002611,BGI_novel_T002614	XP_015133724.1|0.0e+00|PREDICTED: plastin-3 isoform X2 [Gallus gallus]
395712	5.76	1.836	-1.65506	3.70181e-103	1.06729e-103	ABCB1	XM_015281293.2,NM_204894.1,XM_025147035.1,BGI_novel_T001315,XM_025147034.1,XM_025147036.1,XM_025147037.1,XM_015281292.2,BGI_novel_T001316,XM_025147033.1,XM_025147038.1	XP_015136778.1|0.0e+00|PREDICTED: multidrug resistance protein 1 isoform X1 [Gallus gallus]
395779	2.39	0.756	-1.65889	6.69745e-32	4.05966e-32	COCH	XM_015287284.2,NM_204937.1	XP_015142770.1|0.0e+00|PREDICTED: cochlin isoform X1 [Gallus gallus]
395886	9.093	2.943	-1.66027	4.03264e-165	8.46649e-166	MITF	XM_015292970.2,XM_015292971.2,XM_015292968.2,XM_015292973.2,BGI_novel_T006113,NM_205029.1,XM_015292972.2,XM_015292967.2,XM_015292974.2,XM_015292966.2,XM_015292969.2	XP_015148455.1|2.0e-284|PREDICTED: microphthalmia-associated transcription factor isoform X4 [Gallus gallus]
421579	3.05	0.966	-1.66213	1.48097e-65	5.67675e-66	MAP3K4	XM_015284325.2,XM_015284322.1,BGI_novel_T002251,XM_015284320.1,XM_015284321.2,XM_015284323.1,BGI_novel_T002250,BGI_novel_T002253,XM_015284324.2,BGI_novel_T002252,XM_025148975.1,XM_015284319.1,XM_015284326.1	XP_015139812.1|0.0e+00|PREDICTED: mitogen-activated protein kinase kinase kinase 4 isoform X7 [Gallus gallus]
419032	2.703	0.856	-1.66573	8.80133e-223	1.47826e-223	NOBOX	XM_015292292.2,XM_015292279.2,XM_015292286.2,XM_417224.6,BGI_novel_T000452,XM_015292281.2	XP_015147767.1|0.0e+00|PREDICTED: homeobox protein NOBOX isoform X2 [Gallus gallus]
422729	5.463	1.74	-1.66738	5.31363e-69	1.96388e-69	MTUS1	XM_420684.6,XM_025149823.1,XM_004935996.3,XM_015285555.2,XM_004935997.3,XM_015285556.2,XM_025149822.1,XM_015285554.2,BGI_novel_T003057,XM_004935995.3	XP_004936052.1|0.0e+00|PREDICTED: microtubule-associated tumor suppressor 1 isoform X1 [Gallus gallus]
395694	1.996	0.626	-1.66902	2.2528e-20	1.75702e-20	ITPKA	NM_204881.1	NP_990212.1|1.2e-266|inositol-trisphosphate 3-kinase A [Gallus gallus]
419080	0.853	0.27	-1.6695	2.60724e-15	2.36135e-15	LOC419080	XM_015280946.2,XM_004949811.2	XP_021239729.1|1.9e-171|olfactory receptor 51E2-like [Numida meleagris]
100857413	0.626	0.196	-1.67217	2.15398e-19	1.73055e-19	NLRC5	NM_001318435.1	NP_001305364.1|0.0e+00|protein NLRC5 [Gallus gallus]
395503	5.66	1.766	-1.67363	1.89594e-113	5.12736e-114	RUNX1T1	NM_204744.2,XM_015282774.2,NM_001303464.1,XM_015282777.2,XM_015282772.2,XM_015282773.2,XM_015282771.2,XM_015282770.2,XM_015282776.2	XP_013161079.1|0.0e+00|PREDICTED: protein CBFA2T1 isoform X2 [Falco peregrinus]
772026	1.57	0.38	-1.67646	1.11875e-22	8.2138e-23	RPH3AL	XM_001235227.4,BGI_novel_T007653,XM_015296119.2,XM_025142001.1,XM_004946702.3,XM_004946707.3,XM_004946704.3,XM_004946703.3,XM_004946706.3,XM_004946705.3,XM_025142000.1	XP_004946759.1|3.3e-171|PREDICTED: rab effector Noc2 isoform X1 [Gallus gallus]
415560	273.353	85.316	-1.67788	0	0	ITGA11	XM_015292217.2,XM_015292219.2,BGI_novel_T005606,XM_413930.6,XM_015292220.1,XM_015292216.1,XM_015292218.2	XP_413930.2|0.0e+00|PREDICTED: integrin alpha-11 isoform X1 [Gallus gallus]
418146	1.373	0.403	-1.68003	2.56921e-41	1.35064e-41	IQSEC3	XM_004937918.3,XM_004937914.3,XM_004937919.3,XM_025141476.1,XM_416377.6,XM_015286921.2	XP_015142407.1|0.0e+00|PREDICTED: IQ motif and SEC7 domain-containing protein 3 isoform X1 [Gallus gallus]
768337	42.66	13.26	-1.68293	0	0	TUBB2A	XM_001231209.5	XP_015507719.1|8.9e-263|PREDICTED: tubulin beta-1 chain-like [Parus major]
769500	13.213	4.096	-1.68304	2.23266e-64	8.64626e-65	C6H10orf54	XM_001231980.4	XP_001231981.2|8.2e-182|PREDICTED: platelet receptor Gi24 [Gallus gallus]
374141	10.7	3.343	-1.68422	4.8247e-147	1.09718e-147	TLR2A	NM_204278.1,BGI_novel_T002751,XM_025149465.1,XM_025149466.1,XM_025149463.1,XM_025149464.1,XM_025149467.1,XM_025149461.1,XM_025149462.1	NP_989609.1|0.0e+00|toll-like receptor 2 type-1 precursor [Gallus gallus]
418692	3.856	1.213	-1.68534	3.92964e-91	1.22202e-91	MGAT4A	BGI_novel_T000811,XM_015277715.2,NM_001012824.1,XM_015277716.2	XP_015133202.1|3.6e-306|PREDICTED: alpha-1,3-mannosyl-glycoprotein 4-beta-N-acetylglucosaminyltransferase A isoform X2 [Gallus gallus]
427076	0.183	0.056	-1.69095	7.5672e-09	8.95348e-09	TMEM200A	XM_025149189.1,XM_424670.6,XM_004940224.3,XM_025149188.1	XP_424670.2|1.1e-275|PREDICTED: transmembrane protein 200A [Gallus gallus]
374270	8.94	2.803	-1.69118	2.01563e-200	3.71643e-201	IL16	BGI_novel_T005544,NM_001277996.1,BGI_novel_T005545,BGI_novel_T005543	NP_001264925.1|0.0e+00|interleukin 16 [Gallus gallus]
429096	9.133	2.633	-1.69373	1.94982e-216	3.35596e-217	PIK3R3	XM_426652.6,XM_004936762.3	XP_004936819.1|1.1e-276|PREDICTED: phosphatidylinositol 3-kinase regulatory subunit gamma isoform X2 [Gallus gallus]
424374	33.456	9.83	-1.69414	1.3398e-135	3.21394e-136	CRIP2	XM_015290407.1,XM_015290408.2	XP_015145894.1|1.6e-140|PREDICTED: cysteine-rich protein 2 isoform X2 [Gallus gallus]
420531	4.05	1.223	-1.69527	5.16518e-10	5.78073e-10	ACBD7	XM_429769.4,XM_025148399.1	XP_429769.2|1.9e-41|PREDICTED: acyl-CoA-binding domain-containing protein 7 isoform X2 [Gallus gallus]
769847	53.42	16.366	-1.69669	1.45886e-265	2.11368e-266	GSTT1L	XM_001231970.5	XP_001231971.4|2.0e-138|PREDICTED: glutathione S-transferase theta-1-like [Gallus gallus]
395875	1033.05	332.106	-1.6987	0	0	COL12A1	BGI_novel_T002431,XM_015284744.2,XM_015284742.2,BGI_novel_T002432,BGI_novel_T002433,BGI_novel_T002430,XM_015284743.1,XM_015284740.2,NM_205021.3,XM_015284739.2	NP_990352.2|0.0e+00|collagen alpha-1(XII) chain precursor [Gallus gallus]
417869	18.536	5.713	-1.69965	0	0	NAV3	XM_015281849.1,XM_015281843.1,XM_015281870.2,XM_015281895.2,BGI_novel_T000206,XM_015281886.1,BGI_novel_T000205,XM_015281866.1,BGI_novel_T000207,BGI_novel_T000202,XM_015281902.1,XM_015281857.1,NM_001159347.2,XM_015281882.1,XM_015281853.1,XM_015281854.1,BGI_novel_T000204,XM_015281862.1,BGI_novel_T000203	XP_015137348.1|0.0e+00|PREDICTED: neuron navigator 3 isoform X6 [Gallus gallus]
418013	5.033	1.563	-1.70003	3.3124e-138	7.84257e-139	MGAT3	XM_015285179.2,BGI_novel_T000288,XM_015285197.2,XM_015285185.2,XM_015285194.2,XM_015285183.2,NM_001012693.1,XM_025148586.1,XM_015285191.2,BGI_novel_T000287	XP_010709123.1|3.5e-308|PREDICTED: beta-1,4-mannosyl-glycoprotein 4-beta-N-acetylglucosaminyltransferase isoform X2 [Meleagris gallopavo]
769051	0.71	0.216	-1.70028	6.55672e-19	5.34003e-19	FAM155B	XM_015278333.2	XP_005526296.1|1.6e-208|PREDICTED: transmembrane protein FAM155B [Pseudopodoces humilis]
423774	1.376	0.423	-1.70226	6.39372e-13	6.33564e-13	ANXA8	XM_015288444.2,XM_421646.6	XP_421646.1|2.3e-181|PREDICTED: annexin A8 [Gallus gallus]
395650	22.306	6.99	-1.70442	4.90096e-165	1.02997e-165	PHOSPHO1	XM_015299435.2,XM_015299433.2,NM_204845.2,XM_015299434.2	XP_015154920.1|2.5e-155|PREDICTED: phosphoethanolamine/phosphocholine phosphatase isoform X2 [Gallus gallus]
396397	1.386	0.446	-1.71284	4.22321e-19	3.41495e-19	LHX9	XM_025152770.1,XM_015290253.2,XM_015290252.2,XM_025152769.1,XM_015290250.2,XM_015290251.2,NM_205426.1	Q90881.2|2.8e-237|RecName: Full=LIM/homeobox protein Lhx9; Short=LIM homeobox protein 9
417779	0.31	0.086	-1.71743	2.56043e-12	2.59412e-12	DOCK4	XM_004937545.3,XM_004937546.3,XM_004937544.2,XM_015282398.2,XM_416024.6	XP_416024.3|0.0e+00|PREDICTED: dedicator of cytokinesis protein 4 isoform X4 [Gallus gallus]
427914	1.99	0.6	-1.71905	2.84316e-38	1.56499e-38	NT5DC3	XM_425487.6	XP_425487.4|0.0e+00|PREDICTED: 5'-nucleotidase domain-containing protein 3 [Gallus gallus]
417627	12.81	3.876	-1.72302	0	0	PPM1E	XM_415871.6	XP_415871.5|0.0e+00|PREDICTED: protein phosphatase 1E [Gallus gallus]
424435	0.14	0.04	-1.72302	4.19051e-05	6.27527e-05	TNN	XM_015290526.2	XP_015146012.1|0.0e+00|PREDICTED: tenascin-N [Gallus gallus]
396202	3.963	1.133	-1.72914	6.481e-100	1.90899e-100	NRCAM	XM_015279492.2,BGI_novel_T000153,XM_015280683.2,XM_015280631.2,XM_015280075.2,XM_015280474.2,BGI_novel_T000156,XM_015280850.2,XM_015279719.2,XM_015280741.2,XM_015280202.2,XM_015280706.2,BGI_novel_T000166,XM_015280580.2,XM_015280291.2,XM_015280785.1,XM_015279907.2,XM_015280371.2,BGI_novel_T000154,BGI_novel_T000164,XM_025146775.1,XM_015279576.2,XM_015279675.2,BGI_novel_T000161,XM_015280327.2,BGI_no…	XP_021127783.1|0.0e+00|neuronal cell adhesion molecule isoform X8 [Anas platyrhynchos]
423447	0.846	0.256	-1.73024	5.98495e-21	4.60314e-21	CCDC85C	XM_421357.5,XM_015287778.2	XP_015143264.1|4.4e-232|PREDICTED: coiled-coil domain-containing protein 85C isoform X2 [Gallus gallus]
424930	1.04	0.32	-1.7328	4.85936e-14	4.60209e-14	B3GNT7	XM_422738.6,XM_015291495.2	XP_422738.1|9.6e-237|PREDICTED: UDP-GlcNAc:betaGal beta-1,3-N-acetylglucosaminyltransferase 7 isoform X1 [Gallus gallus]
422165	10.746	3.23	-1.73572	8.51572e-226	1.41259e-226	AR	NM_001040090.1	NP_001035179.1|0.0e+00|androgen receptor [Gallus gallus]
420384	20.836	6.21	-1.73578	2.12999e-63	8.33718e-64	AQP1	NM_001039453.1	NP_001034542.1|3.2e-147|aquaporin-1 [Gallus gallus]
418737	24.59	7.35	-1.73603	8.31175e-258	1.23881e-258	GAS6	XM_015277909.2	XP_015133395.1|0.0e+00|PREDICTED: growth arrest-specific protein 6 [Gallus gallus]
107053416	0.076	0.026	-1.74163	3.17927e-08	3.90114e-08	LOC107053416	XM_025151100.1	XP_015142179.1|0.0e+00|PREDICTED: mucin-5AC [Gallus gallus]
420722	0.333	0.1	-1.7418	5.49492e-07	7.24516e-07	FBXL2	XM_015281722.2,XM_015281720.2,XM_015281721.2,XM_025147520.1	XP_015137206.1|2.8e-238|PREDICTED: F-box/LRR-repeat protein 2 isoform X1 [Gallus gallus]
100857332	11.006	3.276	-1.74219	2.30152e-100	6.75048e-101	DOK2	XM_015297440.2,XM_004947573.3,XM_003642549.4	XP_003642597.3|1.7e-280|PREDICTED: docking protein 2 isoform X1 [Gallus gallus]
418107	23.69	7.053	-1.74292	2.29723e-121	5.94518e-122	AKR1D1	NM_001277393.1,XM_015285521.2	XP_015141007.1|8.9e-167|PREDICTED: 3-oxo-5-beta-steroid 4-dehydrogenase isoform X1 [Gallus gallus]
418892	0.646	0.196	-1.7466	2.65132e-17	2.25357e-17	C4A	XM_025146825.1,XM_004938740.3	XP_417086.3|0.0e+00|PREDICTED: complement C4 [Gallus gallus]
395445	13.92	4.173	-1.74718	1.07491e-95	3.25108e-96	BOK	NM_204706.1,BGI_novel_T005150	NP_990037.1|1.9e-116|bcl-2-related ovarian killer protein [Gallus gallus]
BGI_novel_G000135	3.693	1.096	-1.75004	1.25086e-124	3.19561e-125	BGI_novel_G000135	BGI_novel_T005576
430410	12.046	3.573	-1.7517	1.40652e-227	2.31267e-228	VAT1L	XM_427969.6	XP_427969.4|2.8e-237|PREDICTED: synaptic vesicle membrane protein VAT-1 homolog-like isoform X2 [Gallus gallus]
408184	19.753	5.833	-1.75893	0	0	GHR	BGI_novel_T009343,NM_001001293.1,BGI_novel_T009344	NP_001001293.1|0.0e+00|growth hormone receptor precursor [Gallus gallus]
416759	14.826	4.366	-1.76179	1.10156e-199	2.03793e-200	TMEM204	XM_415054.6	XP_415054.1|3.0e-124|PREDICTED: transmembrane protein 204 [Gallus gallus]
396134	3.63	1.07	-1.76271	1.41889e-105	4.02009e-106	MET	NM_205212.2,XM_015279209.2	XP_015134695.1|0.0e+00|PREDICTED: hepatocyte growth factor receptor isoform X1 [Gallus gallus]
770226	1.43	0.42	-1.76577	3.61249e-25	2.51411e-25	GNAZ	XM_015275439.2,XM_001232444.4	XP_003763374.1|5.3e-200|PREDICTED: guanine nucleotide-binding protein G(z) subunit alpha [Sarcophilus harrisii]
424893	1.386	0.406	-1.76652	2.43842e-10	2.69708e-10	APOD	NM_001011692.1,BGI_novel_T005237	XP_021249153.1|4.4e-111|apolipoprotein D [Numida meleagris]
424033	3.4	0.966	-1.76917	1.06698e-46	5.20548e-47	AHR2	XM_015289246.2,NM_001319008.1	NP_001305937.1|0.0e+00|aryl hydrocarbon receptor 2 [Gallus gallus]
423917	20.716	6.07	-1.76933	0	0	HSPA12A	XM_025151747.1,XM_015288922.2,XM_025151746.1	XP_009704778.1|0.0e+00|PREDICTED: heat shock 70 kDa protein 12A [Cariama cristata]
424118	17.09	4.94	-1.77223	0	0	SSFA2	XM_015289552.2,XM_025152404.1	XP_015145038.1|0.0e+00|PREDICTED: sperm-specific antigen 2 [Gallus gallus]
419859	3.486	0.903	-1.78529	7.5721e-42	3.9492e-42	CAMK1G	XM_015299047.2,XM_025143926.1,XM_015299046.2,BGI_novel_T008780,XM_025143925.1,XM_015299045.2,XM_004934981.3	XP_004935037.1|5.0e-275|PREDICTED: calcium/calmodulin-dependent protein kinase type 1G isoform X2 [Gallus gallus]
422685	4.243	1.23	-1.78889	2.85403e-103	8.2227e-104	PRSS12	XM_015276362.2,BGI_novel_T002988	XP_015717348.1|0.0e+00|PREDICTED: LOW QUALITY PROTEIN: neurotrypsin [Coturnix japonica]
421879	30.116	9.353	-1.78965	0	0	RAB23	XM_015284829.2,XM_015284828.2,NM_001110060.1	NP_001103530.1|3.1e-130|ras-related protein Rab-23 [Gallus gallus]
418800	0.7	0.206	-1.79013	4.24608e-16	3.75119e-16	PCDH9	XM_015276921.2,XM_003640559.4,XM_416995.5,XM_015276916.2,XM_004934725.3	XP_004934782.1|0.0e+00|PREDICTED: protocadherin-9 isoform X2 [Gallus gallus]
424907	3.1	0.893	-1.79013	5.54589e-19	4.50293e-19	OSTN	XM_025153367.1,XM_015291403.2,XM_025153364.1,XM_025153366.1,BGI_novel_T005253,XM_025153365.1,XM_025153368.1,NM_001098608.1	XP_021251310.1|9.2e-66|osteocrin isoform X1 [Numida meleagris]
BGI_novel_G000112	5.22	1.503	-1.79228	1.78118e-27	1.17889e-27	BGI_novel_G000112	BGI_novel_T004046
425232	0.33	0.093	-1.79785	6.69515e-11	7.20772e-11	CCDC83	BGI_novel_T001085,XM_015280783.2,BGI_novel_T001086,XM_423016.6,XM_015280774.2,XM_025146923.1,BGI_novel_T001087,XM_025146925.1,XM_025146924.1	XP_009918836.1|6.7e-120|PREDICTED: coiled-coil domain-containing protein 83 [Haliaeetus albicilla]
422171	33.086	9.573	-1.79889	0	0	LOC422171	BGI_novel_T002538,BGI_novel_T002537,XM_025150523.1,XM_025150525.1,BGI_novel_T002536,XM_025150524.1,XM_015285256.2,XM_420168.6	XP_420168.3|0.0e+00|PREDICTED: rho GTPase-activating protein 20 [Gallus gallus]
417601	13.576	3.863	-1.80058	1.94026e-50	8.91343e-51	CENPV	XM_415846.6	XP_415846.2|3.0e-125|PREDICTED: centromere protein V [Gallus gallus]
427850	0.063	0.02	-1.80319	6.92393e-05	0.000105758	RELN	XM_004934740.3,XM_025151097.1,NM_001305123.1	NP_001292052.1|0.0e+00|reelin precursor [Gallus gallus]
424761	1.266	0.326	-1.80444	2.40274e-52	1.07633e-52	ARHGEF4	XM_004936967.3,BGI_novel_T005102	XP_004937024.2|0.0e+00|PREDICTED: LOW QUALITY PROTEIN: rho guanine nucleotide exchange factor 4 [Gallus gallus]
423749	6.09	1.753	-1.80628	1.81095e-179	3.57997e-180	SORBS1	XM_015288504.2,BGI_novel_T004081,XM_025151857.1,XM_025151853.1,BGI_novel_T004072,XM_025151850.1,XM_015288510.2,XM_015288478.2,BGI_novel_T004079,XM_015288470.2,XM_015288475.2,XM_015288500.2,XM_015288511.2,XM_015288490.2,BGI_novel_T004066,XM_025151856.1,BGI_novel_T004085,XM_015288494.2,XM_015288488.2,XM_015288509.2,XM_015288515.2,XM_025151852.1,XM_015288472.1,XM_015288481.2,BGI_novel_T004078,XM_015…	XP_015722095.1|0.0e+00|PREDICTED: sorbin and SH3 domain-containing protein 1 isoform X36 [Coturnix japonica]
424186	287.803	81.636	-1.80846	0	0	FAP	BGI_novel_T004518,BGI_novel_T004517,BGI_novel_T004516,NM_001193639.3,BGI_novel_T004519	NP_001180568.1|0.0e+00|prolyl endopeptidase FAP [Gallus gallus]
419444	6.463	1.896	-1.80846	1.23536e-195	2.31885e-196	PIK3CD	XM_015296888.2,XM_025142519.1,NM_001012696.1,BGI_novel_T008022,XM_015296889.2	XP_015152374.1|0.0e+00|PREDICTED: phosphatidylinositol 4,5-bisphosphate 3-kinase catalytic subunit delta isoform isoform X1 [Gallus gallus]
420535	0.976	0.276	-1.80875	2.03777e-22	1.50587e-22	RUNDC3B	XM_015281390.2,NM_001030972.1	NP_001026143.1|6.7e-175|RUN domain-containing protein 3B [Gallus gallus]
771016	0.05	0.013	-1.80875	0.000669973	0.00112653	GPR52	XM_025153192.1	XP_004943322.1|7.6e-214|PREDICTED: probable G-protein coupled receptor 52 [Gallus gallus]
424049	10.243	2.926	-1.80885	4.53557e-171	9.28667e-172	STK17B	XM_015289393.2,NM_001031249.1,XM_025152162.1,XM_015289395.2	XP_015144879.1|7.4e-221|PREDICTED: serine/threonine-protein kinase 17B isoform X1 [Gallus gallus]
418074	152.833	43.566	-1.81095	0	0	NUAK1	XM_416310.6	XP_416310.2|0.0e+00|PREDICTED: NUAK family SNF1-like kinase 1 isoform X1 [Gallus gallus]
776031	137.93	39.173	-1.81451	0	0	ANGPTL2	NM_001277699.1	NP_001264628.1|3.2e-296|angiopoietin-related protein 2 precursor [Gallus gallus]
427704	1.513	0.426	-1.81811	2.27586e-23	1.65201e-23	SLC2A11	NM_001347709.1	XP_021268745.1|2.6e-277|uncharacterized protein LOC110406494 [Numida meleagris]
428166	26.136	8.71	-1.8197	0	0	PMEPA1	XM_025142265.1,NM_001031492.1,BGI_novel_T007917,XM_025142264.1,BGI_novel_T007918,BGI_novel_T007916	NP_001026663.1|5.1e-163|protein TMEPAI [Gallus gallus]
421383	39.703	10.883	-1.83235	0	0	SERTAD4	XM_015283861.2,BGI_novel_T002136,XM_025148830.1	XP_015139347.1|8.3e-207|PREDICTED: SERTA domain-containing protein 4 [Gallus gallus]
423989	14.79	3.64	-1.83275	1.07672e-129	2.67462e-130	TFPI	XM_025152298.1,XM_025152297.1,XM_421849.5,XM_025152280.1,XM_025152296.1,XM_015289199.2,BGI_novel_T004301,XM_025152292.1,XM_025152281.1,XM_025152295.1,XM_025152288.1,XM_025152284.1,XM_025152294.1,XM_025152303.1,XM_025152277.1,XM_004942406.3,XM_025152287.1,XM_025152302.1,XM_025152285.1,XM_004942407.3,XM_025152279.1,XM_025152276.1,XM_015289185.2,XM_004942402.3,XM_025152289.1,XM_015289192.2,XM_025152…	XP_004942457.1|1.3e-189|PREDICTED: tissue factor pathway inhibitor isoform X1 [Gallus gallus]
693251	2.823	0.786	-1.8332	3.65494e-23	2.65914e-23	IL11RA	XM_015277363.2,NM_001044674.1,XM_015277362.2,XM_015277360.2,XM_015277359.1,XM_015277361.2	XP_015132847.1|2.3e-246|PREDICTED: interleukin-11 receptor subunit alpha isoform X3 [Gallus gallus]
408043	15.946	4.466	-1.83528	0	0	LAMC2	BGI_novel_T004786,XM_004943268.3	XP_010714130.1|0.0e+00|PREDICTED: laminin subunit gamma-2 [Meleagris gallopavo]
423225	1.37	0.383	-1.84032	1.83911e-79	6.21612e-80	SPTBN5	XM_025151299.1	XP_421149.5|0.0e+00|PREDICTED: spectrin beta chain, non-erythrocytic 5 [Gallus gallus]
395535	20.226	5.56	-1.84626	2.44436e-236	3.89212e-237	OLFM1	NM_204767.1,XM_015279317.2	XP_001366074.1|4.3e-263|PREDICTED: noelin isoform X1 [Monodelphis domestica]
415344	25.393	7.033	-1.84802	4.27425e-296	5.65967e-297	LINGO1	NM_001024577.1,BGI_novel_T005430,BGI_novel_T005429	OXB82013.1|0.0e+00|hypothetical protein H355_004096 [Colinus virginianus]
425843	34.07	9.446	-1.84811	0	0	ADAM12	NM_001270714.2,NM_001142850.3	XP_015144479.1|0.0e+00|PREDICTED: disintegrin and metalloproteinase domain-containing protein 12 isoform X1 [Gallus gallus]
BGI_novel_G000028	0.713	0.203	-1.85258	1.05931e-29	6.70948e-30	BGI_novel_G000028	BGI_novel_T000715
428556	0.313	0.083	-1.85371	2.83425e-07	3.66102e-07	CLIP4	BGI_novel_T002004,XM_015278130.2,XM_025148912.1,BGI_novel_T002002,XM_025148911.1,BGI_novel_T002003,XM_004940186.3,BGI_novel_T002000,XM_025148913.1,BGI_novel_T002001,XM_025148914.1	XP_004940243.1|0.0e+00|PREDICTED: CAP-Gly domain-containing linker protein 4 isoform X1 [Gallus gallus]
422933	1.99	0.55	-1.8538	9.18935e-50	4.25591e-50	ADRA1D	XM_004936274.3	XP_004936331.1|2.4e-296|PREDICTED: alpha-1D adrenergic receptor [Gallus gallus]
415797	97.626	26.976	-1.8553	0	0	CDH11	BGI_novel_T005772,NM_001004371.1	XP_014743397.1|0.0e+00|PREDICTED: cadherin-11 [Sturnus vulgaris]
424238	2.553	0.706	-1.85587	4.98781e-84	1.64232e-84	TFCP2L1	XM_422087.6,BGI_novel_T004574	XP_015724314.1|5.3e-283|PREDICTED: transcription factor CP2-like protein 1 [Coturnix japonica]
424071	1.613	0.466	-1.8563	5.89016e-44	2.98628e-44	AOX1	XM_025152178.1,XM_015289417.2,NM_001038692.1,XM_025152177.1,XM_025152176.1	XP_021256486.1|0.0e+00|aldehyde oxidase isoform X1 [Numida meleagris]
424143	60.293	16.593	-1.86343	0	0	WIPF1	XM_015289441.2,XM_015289444.2,XM_015289445.2,XM_025152191.1,XM_015289443.2,XM_015289442.2,NM_001012917.1	NP_001012935.1|7.9e-304|WAS/WASL-interacting protein family member 1 [Gallus gallus]
374231	7.796	2.143	-1.86475	8.11093e-210	1.43818e-210	FOXO1	NM_204328.1	NP_989659.1|0.0e+00|forkhead box protein O1 [Gallus gallus]
771145	1.733	0.54	-1.86763	5.36863e-103	1.54898e-103	MAPK13	BGI_novel_T008711,XM_015298762.2,XM_001234442.4,BGI_novel_T008712	XP_001234443.1|1.7e-210|PREDICTED: mitogen-activated protein kinase 13 isoform X1 [Gallus gallus]
100316920	1.013	0.313	-1.86783	6.49746e-10	7.31365e-10	OSR1	XM_015284947.2,NM_001168709.1	KFQ65505.1|1.3e-143|Protein odd-skipped-related 1, partial [Phaethon lepturus]
395406	2.46	0.67	-1.86882	7.14346e-114	1.92741e-114	TENM4	NM_001354731.1,BGI_novel_T001089	XP_022263310.1|0.0e+00|teneurin-4 isoform X8 [Canis lupus familiaris]
768701	6.766	2.01	-1.87114	1.76727e-158	3.82058e-159	KIAA1671	XM_015275340.2,XM_015275339.2,XM_015275341.2,XM_025155509.1,XM_025155508.1,NM_001079738.1	XP_015733684.1|6.9e-185|PREDICTED: uncharacterized protein KIAA1671 homolog isoform X3 [Coturnix japonica]
428776	3.6	0.99	-1.87424	1.51899e-116	4.0511e-117	SLC9B2	XM_025149955.1,XM_025149953.1,XM_015285612.2,BGI_novel_T003051,XM_025149957.1,XM_025149954.1,XM_025149956.1	XP_426332.2|2.2e-274|PREDICTED: mitochondrial sodium/hydrogen exchanger 9B2 isoform X1 [Gallus gallus]
423351	1.033	0.276	-1.87786	9.31323e-23	6.83194e-23	SYNDIG1L	XM_015287675.2	XP_015143161.1|4.4e-134|PREDICTED: synapse differentiation-inducing gene protein 1-like [Gallus gallus]
BGI_novel_G000082	1.633	0.443	-1.88054	3.08865e-68	1.1531e-68	BGI_novel_G000082	BGI_novel_T002752
101749287	10.313	2.79	-1.88164	6.82383e-131	1.68798e-131	LOC101749287	XM_004949962.3,XM_004949961.3	XP_015735673.1|9.3e-106|PREDICTED: uncharacterized protein C16orf45 homolog [Coturnix japonica]
768449	2.36	0.636	-1.88485	9.84677e-28	6.47418e-28	F2RL2	XM_001231245.5	XP_001231246.1|1.9e-216|PREDICTED: proteinase-activated receptor 3 [Gallus gallus]
422781	17.88	4.94	-1.88607	0	0	APBB2	BGI_novel_T003093,XM_004936096.3,XM_004936099.3,XM_004936100.3,XM_004936095.3,XM_015285459.2,XM_015285458.2,XM_004936106.2,XM_004936093.3,XM_004936094.3,BGI_novel_T003096,XM_004936098.3,XM_420735.6,XM_004936097.3,XM_004936101.3,BGI_novel_T003095,XM_015285457.2,XM_004936105.3,XM_004936104.3,XM_025150506.1,XM_004936092.3,XM_015285456.2,BGI_novel_T003094	XP_004936149.1|0.0e+00|PREDICTED: amyloid beta A4 precursor protein-binding family B member 2 isoform X1 [Gallus gallus]
429082	35.576	9.426	-1.8862	0	0	FRRS1	BGI_novel_T004827,XM_004936557.3,XM_025152935.1,XM_025152934.1,XM_015290752.2,XM_025152936.1,XM_004936556.3	XP_004936613.1|0.0e+00|PREDICTED: ferric-chelate reductase 1 isoform X2 [Gallus gallus]
426928	18.136	4.896	-1.88757	0	0	ENPP3	XM_003641039.4	XP_003641087.2|0.0e+00|PREDICTED: ectonucleotide pyrophosphatase/phosphodiesterase family member 3 [Gallus gallus]
396196	4.583	1.243	-1.88881	3.0529e-27	2.03391e-27	GCG	NM_001190165.3,XM_015289639.2,NM_205260.4	NP_990591.1|3.9e-80|glucagon isoform 2 preproprotein [Gallus gallus]
373946	97.076	26.083	-1.88907	0	0	ITGA3	XM_015299422.2,BGI_novel_T008917,XM_015299424.2,BGI_novel_T008918,BGI_novel_T008919,NM_204146.1,XM_015299423.2,XM_015299421.2,XM_015299425.2	XP_015154911.1|0.0e+00|PREDICTED: integrin alpha-3 isoform X5 [Gallus gallus]
396006	92.67	24.933	-1.89235	0	0	PTRF	NM_001001471.1	OXB71273.1|1.1e-194|hypothetical protein H355_005744 [Colinus virginianus]
418256	75.283	20.096	-1.89649	0	0	MFAP5	XM_015292825.2,XM_025142781.1,XM_416482.6,XM_004938101.3,BGI_novel_T000463	XP_416482.2|1.0e-89|PREDICTED: microfibrillar-associated protein 5 isoform X1 [Gallus gallus]
418052	3.74	0.986	-1.89917	1.27727e-34	7.39172e-35	NCF4	XM_015285356.2,NM_001039272.1,XM_015285353.2,XM_015285360.2,XM_015285351.2,XM_025148666.1	NP_001034361.1|1.4e-192|neutrophil cytosol factor 4 [Gallus gallus]
417891	606.713	160.406	-1.91452	0	0	LUM	NM_001276357.1	NP_001263286.1|2.9e-198|lumican precursor [Gallus gallus]
101747799	0.173	0.046	-1.91566	0.00027262	0.000441626	LOC101747799	XM_004937653.3	XP_004937710.2|4.8e-178|PREDICTED: E3 ubiquitin-protein ligase Topors-like [Gallus gallus]
395368	0.206	0.066	-1.91566	0.00027262	0.000441626	CGNRHRL	XM_015292070.2,NM_204653.1	NP_989984.1|3.3e-219|gonadotropin-releasing hormone receptor-like [Gallus gallus]
419225	0.203	0.056	-1.91566	4.50467e-05	6.76632e-05	SS18L1	XM_417402.6	XP_417402.4|1.1e-236|PREDICTED: calcium-responsive transactivator [Gallus gallus]
420943	0.033	0.01	-1.91566	0.000678371	0.00114108	ABCA13	XM_025147734.1	XP_015137793.1|0.0e+00|PREDICTED: ATP-binding cassette sub-family A member 13 [Gallus gallus]
416376	2.88	0.76	-1.92147	3.63783e-169	7.50902e-170	SETBP1	XM_025145238.1,XM_001233853.5,XM_015277426.2	XP_015132912.1|0.0e+00|PREDICTED: SET-binding protein isoform X2 [Gallus gallus]
395496	0.976	0.26	-1.92348	1.67712e-19	1.34359e-19	SLC5A1	NM_001293240.1,XM_015275173.2	XP_003211071.1|0.0e+00|PREDICTED: sodium/glucose cotransporter 1 [Meleagris gallopavo]
770953	5.446	1.426	-1.93029	3.2342e-65	1.24441e-65	DDO	XM_015284572.2,XM_015284573.2,XM_015284575.2	XP_015140058.1|2.5e-198|PREDICTED: D-aspartate oxidase [Gallus gallus]
419889	16.52	4.33	-1.93048	0	0	TSPAN2	XM_004935005.3	XP_004935062.1|3.1e-124|PREDICTED: tetraspanin-2 [Gallus gallus]
427984	0.676	0.18	-1.93452	3.84114e-09	4.48415e-09	KCNJ15	XM_025145308.1,XM_025145283.1,XM_025145295.1,XM_004934549.3,XM_015301374.2,XM_425554.6	XP_021261243.1|7.8e-215|ATP-sensitive inward rectifier potassium channel 15 isoform X7 [Numida meleagris]
404530	0.9	0.23	-1.94541	1.9401e-06	2.6488e-06	TNMD	NM_206985.2	NP_996868.1|2.8e-192|tenomodulin [Gallus gallus]
423908	1.11	0.3	-1.94591	2.9841e-25	2.07368e-25	AFAP1L2	XM_025151948.1,XM_015288938.2,XM_015288947.2,XM_025151950.1,XM_015288946.2,XM_015288945.1,XM_025151951.1,BGI_novel_T004222,XM_025151946.1,XM_025151954.1,XM_025151952.1,XM_015288939.2,XM_025151945.1,XM_025151947.1,XM_025151949.1,XM_025151953.1	XP_015144423.1|0.0e+00|PREDICTED: actin filament-associated protein 1-like 2 isoform X4 [Gallus gallus]
770776	0.14	0.036	-1.94808	4.74993e-06	6.64796e-06	FAM84B	XM_025148158.1,XM_015283142.2,XM_004940033.3,XM_015283143.2	XP_004940090.1|3.9e-176|PREDICTED: protein FAM84B [Gallus gallus]
417369	2.866	0.693	-1.95292	1.57946e-51	7.15086e-52	UNC13D	XM_004946130.3,BGI_novel_T007355,XM_004946127.3,BGI_novel_T007354,XM_015295320.2,XM_015295322.2,XM_015295317.2,BGI_novel_T007356,XM_025141799.1,XM_004946126.3,XM_415627.5,XM_025141798.1	XP_021270878.1|0.0e+00|protein unc-13 homolog D isoform X1 [Numida meleagris]
419790	23.056	6.636	-1.95441	0	0	PHLDB1	XM_015298271.2,XM_025143373.1,XM_025143370.1,XM_015298286.1,BGI_novel_T008546,XM_025143380.1,XM_015298276.1,XM_025143369.1,BGI_novel_T008545,XM_025143375.1,XM_025143377.1,XM_025143382.1,BGI_novel_T008547,XM_025143368.1,XM_025143374.1,XM_015298287.2,XM_025143372.1,XM_025143381.1,XM_025143378.1,XM_025143371.1,XM_015298277.1,BGI_novel_T008549,BGI_novel_T008548,BGI_novel_T008550,XM_025143376.1,XM_025…	XP_015153771.1|0.0e+00|PREDICTED: pleckstrin homology-like domain family B member 1 isoform X13 [Gallus gallus]
418361	19.086	5.153	-1.95454	0	0	BOC	XM_015296548.2,XM_025143716.1,BGI_novel_T000563,XM_025143712.1,XM_025143714.1,XM_015296544.2	XP_015152030.1|0.0e+00|PREDICTED: brother of CDO isoform X1 [Gallus gallus]
417739	0.59	0.153	-1.95519	5.95839e-09	7.01651e-09	MAPK11	NM_001006227.1	XP_015670162.1|4.6e-200|PREDICTED: mitogen-activated protein kinase 11 [Protobothrops mucrosquamatus]
425035	0.063	0.016	-1.96006	7.0289e-05	0.000107405	IGSF10	XM_422837.6	XP_422837.5|0.0e+00|PREDICTED: immunoglobulin superfamily member 10 [Gallus gallus]
771738	1.703	0.436	-1.96006	1.87198e-11	1.96471e-11	ATOH8	NM_001177739.1	NP_001171210.1|1.3e-123|protein atonal homolog 8 [Gallus gallus]
424475	0.836	0.206	-1.96235	3.27873e-17	2.7964e-17	PALMD	XM_025152825.1,NM_001277552.1,XM_015290626.2	NP_001264481.1|0.0e+00|palmdelphin [Gallus gallus]
421186	28.68	7.403	-1.96479	0	0	FKBP5	XM_015298716.2,XM_025143713.1,NM_001005431.1	NP_001005431.1|9.0e-262|peptidyl-prolyl cis-trans isomerase FKBP5 [Gallus gallus]
373952	135.143	34.446	-1.96575	0	0	NBL1	NM_204149.3	NP_989480.2|2.0e-115|neuroblastoma suppressor of tumorigenicity 1 precursor [Gallus gallus]
422529	8.73	2.283	-1.96858	7.63342e-225	1.27258e-225	SGMS2	NM_001277826.1,XM_015276206.2	NP_001264755.1|1.2e-219|phosphatidylcholine:ceramide cholinephosphotransferase 2 [Gallus gallus]
100858127	0.146	0.04	-1.97455	0.000426828	0.000705008	LHFPL3	XM_015275769.2,XM_015275771.2,XM_015275770.2	XP_010579399.1|7.3e-132|PREDICTED: lipoma HMGIC fusion partner-like 3 protein [Haliaeetus leucocephalus]
416155	0.06	0.033	-1.9767	0.000156796	0.000247937	CCNJL	XM_015293663.2,XM_015293664.2,BGI_novel_T006215	XP_015149150.1|7.5e-233|PREDICTED: cyclin-J-like protein isoform X2 [Gallus gallus]
396023	18.366	4.573	-1.98328	2.3694e-137	5.63943e-138	DKK3	XM_015286337.2,NM_205125.1	NP_990456.1|2.2e-209|dickkopf-related protein 3 precursor [Gallus gallus]
107049022	0.323	0.076	-1.98605	7.37261e-06	1.04504e-05	LRRC70	XM_001232010.5	XP_001232011.1|0.0e+00|PREDICTED: leucine-rich repeat-containing protein 70 [Gallus gallus]
378926	0.263	0.066	-1.98605	7.37261e-06	1.04504e-05	ANKRD1	NM_204405.1	NP_989736.1|3.9e-180|ankyrin repeat domain-containing protein 1 [Gallus gallus]
415790	5.083	1.276	-1.98932	1.30862e-90	4.08577e-91	RRAD	NM_001277606.1	NP_001264535.1|1.3e-168|GTP-binding protein RAD [Gallus gallus]
418889	27.126	6.803	-1.99177	2.15289e-266	3.11028e-267	LHFP	XM_417083.6	XP_417083.1|8.0e-115|PREDICTED: lipoma HMGIC fusion partner [Gallus gallus]
101747831	0.133	0.033	-1.99253	0.000495487	0.000822122	AKNAD1	XM_025152994.1,XM_015290356.2,BGI_novel_T004687,XM_015290355.2	XP_015145841.1|0.0e+00|PREDICTED: protein AKNAD1 isoform X1 [Gallus gallus]
396013	0.216	0.053	-1.99658	3.20987e-07	4.16288e-07	MYBPC3	NM_205116.2,XM_015286987.2	XP_017938477.1|0.0e+00|PREDICTED: myosin-binding protein C, cardiac-type [Manacus vitellinus]
772367	0.366	0.103	-1.99658	8.2279e-13	8.19593e-13	DGKB	XM_025147406.1,XM_004939325.3,XM_015281876.2,XM_015281875.2,XM_015281877.2,XM_015281880.2,XM_015281879.2,XM_004939326.3,XM_025147405.1	XP_004939382.1|0.0e+00|PREDICTED: diacylglycerol kinase beta isoform X1 [Gallus gallus]
430648	0.946	0.236	-1.99973	1.99178e-12	2.01095e-12	TINAGL1	XM_428202.6,XM_025143069.1	XP_428202.3|2.7e-292|PREDICTED: tubulointerstitial nephritis antigen-like [Gallus gallus]
427809	33.246	8.346	-2.00008	0	0	SMURF2	XM_015279908.2,XM_425380.6	XP_425380.2|0.0e+00|PREDICTED: E3 ubiquitin-protein ligase SMURF2 isoform X1 [Gallus gallus]
396186	3.093	0.603	-2.00485	4.43011e-44	2.2396e-44	BDNF	XM_015286149.2,XM_015286148.2,XM_015286152.2,NM_001031616.1,XM_015286154.2,XM_015286151.2,XM_015286153.2	XP_015141634.1|5.0e-143|PREDICTED: brain-derived neurotrophic factor isoform X1 [Gallus gallus]
418217	39.043	9.553	-2.01184	0	0	STK38L	NM_001030770.2,XM_015290316.2,XM_015290303.2,XM_015290295.2,BGI_novel_T000414,XM_015290309.2,BGI_novel_T000413	NP_001025941.2|1.1e-275|serine/threonine-protein kinase 38-like [Gallus gallus]
772213	25.34	6.293	-2.01311	0	0	PHF19	XM_015279818.2,XM_015279816.2,XM_015279817.2,XM_025141497.1	XP_015135302.1|0.0e+00|PREDICTED: PHD finger protein 19 [Gallus gallus]
421744	0.526	0.133	-2.0152	0.000108671	0.000169398	FAM26F	XM_419776.4	XP_419776.1|1.3e-187|PREDICTED: protein FAM26F [Gallus gallus]
769940	0.1	0.023	-2.0152	0.000108671	0.000169398	RANBP17	XM_025155009.1	XP_015149087.1|0.0e+00|PREDICTED: LOW QUALITY PROTEIN: ran-binding protein 17 [Gallus gallus]
422637	106.85	26.28	-2.01695	0	0	STBD1	XM_429975.6,XM_015276431.2	XP_015131917.1|1.6e-214|PREDICTED: starch-binding domain-containing protein 1 isoform X1 [Gallus gallus]
421757	40.793	10.163	-2.01827	0	0	SLC22A16	BGI_novel_T002371,XM_004940304.3,XM_015284571.2,BGI_novel_T002368,BGI_novel_T002367,XM_419787.6,XM_025149130.1,BGI_novel_T002369,BGI_novel_T002370	XP_419787.3|0.0e+00|PREDICTED: solute carrier family 22 member 16 isoform X1 [Gallus gallus]
420523	1.58	0.38	-2.02	3.0849e-50	1.42103e-50	CUBN	XM_001235155.5,BGI_novel_T001310,XM_025148395.1,BGI_novel_T001311,XM_025148394.1	XP_001235156.3|0.0e+00|PREDICTED: cubilin isoform X1 [Gallus gallus]
770100	34.48	8.476	-2.02219	0	0	TRIM47	XM_003642325.4	XP_021270884.1|0.0e+00|tripartite motif-containing protein 47 [Numida meleagris]
396164	26.75	6.55	-2.02277	0	0	HIC1	XM_025141903.1,XM_015295680.2,NM_205236.1	NP_990567.1|0.0e+00|hypermethylated in cancer 1 protein [Gallus gallus]
419409	40.526	9.89	-2.03114	0	0	LOC419409	XM_004947401.3,XM_025142630.1,BGI_novel_T007993,XM_417571.5	XP_417571.2|0.0e+00|PREDICTED: Golgi integral membrane protein 4-like isoform X1 [Gallus gallus]
422720	0.176	0.036	-2.03114	0.000267779	0.000433116	TLR3	XM_025149682.1,NM_001011691.3	NP_001011691.3|0.0e+00|toll-like receptor 3 precursor [Gallus gallus]
427643	1.426	0.346	-2.03668	9.48687e-20	7.53713e-20	SPRY4	XM_004945037.3,NM_001079735.1	NP_001073203.1|1.2e-180|protein sprouty homolog 4 [Gallus gallus]
101748418	0.303	0.07	-2.04342	5.5103e-14	5.22658e-14	EXPH5	XM_004938824.3,XM_004938823.3	XP_004938880.1|0.0e+00|PREDICTED: exophilin-5 isoform X1 [Gallus gallus]
102725543	2.84	0.683	-2.04757	9.86015e-45	4.93346e-45	EGR3	XM_015273184.2,XM_025142860.1	OXB74846.1|4.6e-198|hypothetical protein H355_000106 [Colinus virginianus]
417147	648.45	159.456	-2.04846	0	0	ADAMTSL2	XM_025141391.1,BGI_novel_T007193,BGI_novel_T007192,BGI_novel_T007186,BGI_novel_T007196,BGI_novel_T007182,XM_015279783.2,BGI_novel_T007195,XM_015279781.2,BGI_novel_T007180,BGI_novel_T007190,XM_025141388.1,BGI_novel_T007188,XM_004945949.3,BGI_novel_T007181,BGI_novel_T007179,BGI_novel_T007189,XM_015279785.2,BGI_novel_T007178,XM_025141389.1,BGI_novel_T007191,BGI_novel_T007183,XM_004945946.3,BGI_novel…	XP_004946005.2|0.0e+00|PREDICTED: ADAMTS-like protein 2 isoform X1 [Gallus gallus]
112530480	0.116	0.026	-2.05316	0.000663582	0.00111537	LOC112530480	XM_025144564.1	XP_019329586.1|1.6e-52|PREDICTED: LOW QUALITY PROTEIN: uncharacterized protein LOC109279696, partial [Aptenodytes forsteri]
429086	0.136	0.033	-2.05316	0.000663582	0.00111537	RDH8	XM_025152957.1	OPJ77317.1|7.0e-177|coiled-coil domain-containing protein 18 isoform B [Patagioenas fasciata monilis]
378798	2.683	0.67	-2.05702	3.21051e-33	1.89933e-33	ARSH	NM_204372.1,BGI_novel_T000786,BGI_novel_T000785	XP_013036074.1|0.0e+00|PREDICTED: arylsulfatase D-like isoform X1 [Anser cygnoides domesticus]
416024	0.853	0.206	-2.05702	1.85555e-17	1.57024e-17	MGLL	XM_015293082.2,NM_001277143.1,NM_001277142.1,XM_015293081.2	XP_015148567.1|6.0e-177|PREDICTED: monoglyceride lipase isoform X1 [Gallus gallus]
416009	10.023	2.406	-2.06012	6.69402e-120	1.74075e-120	ABHD6	XM_004944586.3,XM_414352.6	XP_414352.1|1.2e-196|PREDICTED: monoacylglycerol lipase ABHD6 [Gallus gallus]
417887	1.096	0.27	-2.06618	8.84121e-52	3.98807e-52	CEP290	XM_004937602.3,XM_015283530.2,XM_004937603.3,XM_004937604.3	XP_010707151.1|0.0e+00|PREDICTED: centrosomal protein of 290 kDa isoform X1 [Meleagris gallopavo]
395673	1.94	0.456	-2.06766	7.12502e-06	1.00876e-05	BCL2A1	NM_204866.1	NP_990197.1|1.2e-94|bcl-2-related protein A1 [Gallus gallus]
100859489	1.533	0.373	-2.07763	8.52452e-50	3.94268e-50	CEP126	XM_004938839.3,BGI_novel_T001047	XP_004938896.1|0.0e+00|PREDICTED: centrosomal protein of 126 kDa [Gallus gallus]
417830	0.113	0.026	-2.08559	0.000167031	0.000264676	TBC1D30	XM_015282716.2,XM_025154209.1,XM_015282717.2,XM_025154206.1,XM_025154205.1	XP_021240754.1|0.0e+00|TBC1 domain family member 30 isoform X1 [Numida meleagris]
424490	0.073	0.02	-2.08559	0.000167031	0.000264676	ABCA4	XM_015290704.2,XM_015290706.2,BGI_novel_T004843,XM_015290702.2,XM_015290703.2,XM_015290705.2,BGI_novel_T004844,XM_015290707.2	XP_015725497.1|0.0e+00|PREDICTED: retinal-specific ATP-binding cassette transporter isoform X3 [Coturnix japonica]
771476	18.2	4.283	-2.08616	1.67775e-268	2.40641e-269	LMOD1	XM_004934868.3	XP_004934925.1|0.0e+00|PREDICTED: leiomodin-1 [Gallus gallus]
414842	2.29	0.493	-2.09094	5.74724e-103	1.65941e-103	CDH6	XM_025147082.1,NM_001001758.2	XP_020642339.1|0.0e+00|cadherin-6 [Pogona vitticeps]
420281	1.046	0.216	-2.094	6.25195e-11	6.72409e-11	COLEC10	XM_015283021.2,NM_001039598.1	XP_020559369.1|1.8e-18|collagen alpha-1(I) chain-like [Oryzias latipes]
431264	1.56	0.366	-2.094	1.23679e-75	4.30884e-76	S1PR3	XM_004949243.3	XP_004949300.1|2.9e-214|PREDICTED: sphingosine 1-phosphate receptor 3 [Gallus gallus]
422620	37.813	10.803	-2.09502	0	0	IGFBP7	XM_420577.6,XM_015276448.1	XP_420577.4|2.3e-189|PREDICTED: insulin-like growth factor-binding protein 7 [Gallus gallus]
426933	16.263	3.783	-2.0987	1.25445e-144	2.88925e-145	FIBIN	NM_001277594.1	NP_001264523.1|4.9e-113|fin bud initiation factor homolog precursor [Gallus gallus]
430280	4.446	1.03	-2.10009	2.79479e-23	2.03101e-23	HSPB7	XM_427836.6	XP_427836.2|1.4e-80|PREDICTED: heat shock protein beta-7 [Gallus gallus]
427842	0.276	0.07	-2.10329	4.4437e-06	6.20827e-06	WSCD1	XM_004946797.3,XM_425416.5	XP_425416.2|0.0e+00|PREDICTED: WSC domain-containing protein 1 isoform X1 [Gallus gallus]
428460	2.223	0.516	-2.10493	1.69665e-54	7.40986e-55	STAC	XM_426020.6,XM_015281697.2	XP_015137183.1|3.3e-216|PREDICTED: SH3 and cysteine-rich domain-containing protein isoform X2 [Gallus gallus]
101748342	0.99	0.223	-2.10926	4.99349e-25	3.48975e-25	FAM196A	XM_025151924.1,XM_025151920.1,XM_004942352.3,XM_025151923.1,XM_025151922.1,XM_025151921.1	XP_004942409.2|4.3e-206|PREDICTED: LOW QUALITY PROTEIN: protein FAM196A [Gallus gallus]
421905	5.683	1.313	-2.10947	2.38521e-117	6.34145e-118	TDRP	XM_015284929.2,XM_015284928.2	XP_015140414.1|2.0e-114|PREDICTED: testis development-related protein isoform X1 [Gallus gallus]
417445	1.61	0.373	-2.11004	1.30449e-14	1.21183e-14	MAP2K6	XM_003642348.4,XM_004946240.3	XP_004946297.1|2.0e-195|PREDICTED: dual specificity mitogen-activated protein kinase kinase 6 isoform X1 [Gallus gallus]
421645	0.15	0.033	-2.11068	3.92097e-11	4.17551e-11	IPCEF1	XM_015284256.2,XM_419684.6,XM_015284254.2,XM_015284255.2	XP_015139741.1|3.6e-244|PREDICTED: interactor protein for cytohesin exchange factors 1 isoform X2 [Gallus gallus]
396081	0.12	0.023	-2.11729	0.000410082	0.000676175	NTRK3	XM_015291984.2,NM_205169.1,XM_015291981.2,XM_015291983.2,XM_015291982.2	NP_990500.1|0.0e+00|NT-3 growth factor receptor precursor [Gallus gallus]
BGI_novel_G000013	0.556	0.123	-2.12299	2.59069e-34	1.50572e-34	BGI_novel_G000013	BGI_novel_T000460
374272	12.54	2.876	-2.12312	6.18877e-170	1.2736e-170	DUSP6	XM_015277249.2,NM_204354.1	NP_989685.1|1.5e-219|dual specificity protein phosphatase 6 [Gallus gallus]
431657	3.533	0.82	-2.12462	1.13405e-122	2.92076e-123	RUSC2	BGI_novel_T009311,XM_015277478.2,BGI_novel_T009310,XM_004937132.3,XM_003642968.4,XM_015277481.2,BGI_novel_T009309,XM_004937131.3,BGI_novel_T009312,XM_015277479.2,BGI_novel_T009313,XM_015277480.2	XP_003643016.1|0.0e+00|PREDICTED: iporin isoform X1 [Gallus gallus]
768665	0.546	0.133	-2.12511	1.08205e-05	1.55154e-05	DUSP22AL	XM_015292638.2,XM_015292633.2,BGI_novel_T005802,XM_025154326.1,BGI_novel_T005801,BGI_novel_T005804,XM_025154328.1,BGI_novel_T005803,XM_025154325.1,BGI_novel_T005805,XM_025154327.1,XM_015292639.1,BGI_novel_T005800,XM_015292634.2,XM_015292629.1	XP_015148115.1|5.7e-171|PREDICTED: dual specificity protein phosphatase 22-A-like isoform X1 [Gallus gallus]
395514	231.056	53.033	-2.12855	0	0	EIF5B	NM_001038496.1,BGI_novel_T000812	NP_001033585.1|0.0e+00|eukaryotic translation initiation factor 5B [Gallus gallus]
418378	131.926	28.636	-2.13151	0	0	COL8A1	BGI_novel_T000582,XM_004938241.3,XM_015296025.2,NM_001293134.1,BGI_novel_T000583	NP_001280063.1|0.0e+00|collagen alpha-1(VIII) chain precursor [Gallus gallus]
427247	5.036	1.146	-2.13366	6.82717e-74	2.41684e-74	MAMDC2	XM_003643015.3	XP_003643063.1|0.0e+00|PREDICTED: MAM domain-containing protein 2 [Gallus gallus]
769904	4.093	0.936	-2.13713	2.11578e-116	5.64714e-117	FAM26E	BGI_novel_T002350,NM_001079492.1	NP_001072960.1|1.1e-179|protein FAM26E [Gallus gallus]
BGI_novel_G000134	0.876	0.2	-2.14021	3.12055e-41	1.64243e-41	BGI_novel_G000134	BGI_novel_T005575
427999	0.733	0.17	-2.14448	5.44791e-10	6.10961e-10	PPEF1	XM_004934686.3,XM_015272852.2,XM_015272868.2,XM_004934685.3,XM_015272842.2,XM_015272881.1,XM_015272832.2,BGI_novel_T000760,XM_015272859.2,XM_004934684.3	XP_004934741.1|0.0e+00|PREDICTED: serine/threonine-protein phosphatase with EF-hands 1 isoform X1 [Gallus gallus]
421681	1.003	0.226	-2.14855	3.41027e-73	1.21363e-73	ARFGEF3	BGI_novel_T002309,XM_025149174.1,XM_025149177.1,XM_025149178.1,XM_004935699.2,XM_419718.6,XM_025149175.1,XM_025149176.1,BGI_novel_T002308	XP_015139675.1|0.0e+00|PREDICTED: brefeldin A-inhibited guanine nucleotide-exchange protein 3 isoform X3 [Gallus gallus]
396111	0.04	0.01	-2.1527	2.63202e-05	3.88454e-05	RYR3	XM_015287297.2,XM_015287298.2,XM_015287302.2,XM_015287292.2,XM_015287301.2,XM_015287300.2,XM_015287295.2,XM_015287294.2,XM_025150610.1,XM_025150609.1,XM_015287299.2,XM_025150608.1,XM_015287293.2,NM_206874.2,XM_015287296.2,XM_015287303.2	XP_015720271.1|0.0e+00|PREDICTED: ryanodine receptor 3 isoform X14 [Coturnix japonica]
BGI_novel_G000024	0.933	0.206	-2.15667	1.8232e-07	2.3342e-07	BGI_novel_G000024	BGI_novel_T000697
395129	13.69	3.06	-2.16123	1.96208e-275	2.73264e-276	ANGPT1	NM_001199447.2	XP_015711648.1|2.0e-294|PREDICTED: angiopoietin-1 [Coturnix japonica]
396209	2.67	0.703	-2.16182	7.90229e-116	2.11573e-116	NFIB	XM_015280077.2,XM_025144690.1,XM_025144687.1,XM_025144689.1,XM_025144688.1,XM_025144685.1,XM_015280082.2,XM_015280079.2,XM_025144686.1,NM_205272.2,XM_015280078.2,XM_015280081.2	XP_015135567.1|2.6e-292|PREDICTED: nuclear factor 1 B-type isoform X5 [Gallus gallus]
770863	1.806	0.396	-2.16359	1.35265e-16	1.17391e-16	GPC3	XM_025150251.1,XM_015278659.2,BGI_novel_T002624,XM_025150250.1	XP_021262080.1|0.0e+00|glypican-3 isoform X1 [Numida meleagris]
427212	10.603	2.363	-2.16555	3.34242e-249	5.0928e-250	F2R	XM_424799.5,XM_025144768.1,XM_025144769.1,XM_004937338.3	XP_004937395.1|1.6e-234|PREDICTED: proteinase-activated receptor 1 isoform X3 [Gallus gallus]
395162	35.016	7.78	-2.16763	0	0	SHISA2	NM_204501.1	XP_021234845.1|4.4e-169|protein shisa-2 homolog [Numida meleagris]
417209	1.823	0.41	-2.16851	6.25263e-43	3.21035e-43	PKN3	XM_015279565.2,BGI_novel_T007122,XM_004945835.3	XP_004945892.1|0.0e+00|PREDICTED: serine/threonine-protein kinase N3 isoform X1 [Gallus gallus]
771284	8.733	1.91	-2.18079	1.52993e-204	2.77002e-205	MKX	XM_015282065.2,XM_015282064.2	XP_015137550.1|5.8e-200|PREDICTED: homeobox protein Mohawk isoform X1 [Gallus gallus]
418989	9.43	2.076	-2.1817	0	0	TRPC6	XM_004938840.3,XM_417184.5	XP_417184.3|0.0e+00|PREDICTED: short transient receptor potential channel 6 isoform X2 [Gallus gallus]
424182	6.846	1.533	-2.18199	1.718e-200	3.16053e-201	COBLL1	XM_015289731.2,XM_422028.5,XM_004942814.3,XM_015289733.2,XM_025152368.1,XM_015289735.2,XM_004942813.3,XM_015289732.2	XP_004942870.1|0.0e+00|PREDICTED: cordon-bleu protein-like 1 isoform X1 [Gallus gallus]
418815	49.403	10.88	-2.18437	0	0	LMO7	XM_015277073.2,XM_025146772.1,XM_417010.6,XM_015277122.2,XM_025146773.1,XM_015277097.2,XM_015277129.2,XM_015277107.2,XM_015277084.2,XM_015277162.2,BGI_novel_T000937,XM_004938639.3,XM_015277143.2,XM_025146774.1,XM_015277113.2,XM_015277135.2,XM_015277071.2,XM_015277141.2,BGI_novel_T000936	XP_015132627.1|0.0e+00|PREDICTED: LIM domain only protein 7 isoform X13 [Gallus gallus]
769894	83.066	18.253	-2.18598	0	0	MXRA7	XM_015295295.2,XM_015295293.2,XM_015295296.2	XP_015150782.1|3.1e-118|PREDICTED: matrix-remodeling-associated protein 7 isoform X3 [Gallus gallus]
770371	0.396	0.09	-2.19577	1.62228e-05	2.35786e-05	SMIM5	XM_015295193.2,NM_001163003.1	NP_001156475.1|9.2e-40|small integral membrane protein 5 [Gallus gallus]
416619	14.696	3.07	-2.19882	0	0	EEF2K	XM_414920.6,XM_004945302.3,XM_015294567.2,XM_004945301.3	XP_015732622.1|0.0e+00|PREDICTED: eukaryotic elongation factor 2 kinase isoform X1 [Coturnix japonica]
426732	0.96	0.206	-2.19945	1.68414e-14	1.57047e-14	NME5	NM_001257371.2	NP_001244300.1|7.0e-118|nucleoside diphosphate kinase homolog 5 [Gallus gallus]
428901	16.34	3.526	-2.20048	0	0	FLRT2	XM_025151414.1,XM_003641305.4,XM_004941848.3	XP_003641353.1|0.0e+00|PREDICTED: leucine-rich repeat transmembrane protein FLRT2 [Gallus gallus]
422630	15.57	3.406	-2.20113	0	0	PPP1R3B	XM_025150150.1,XM_015276443.2,BGI_novel_T002936,XM_025150148.1,XM_420586.6	XP_420586.2|8.2e-176|PREDICTED: protein phosphatase 1 regulatory subunit 3B isoform X1 [Gallus gallus]
395947	0.28	0.06	-2.20517	7.72348e-17	6.66917e-17	SCN5A	XM_015281252.2,XM_015281251.2,NM_001318446.1,XM_015281250.2,XM_025147044.1	XP_015136739.1|0.0e+00|PREDICTED: sodium channel protein type 5 subunit alpha isoform X4 [Gallus gallus]
423444	0.29	0.06	-2.20517	8.80927e-12	9.10465e-12	BCL11B	XM_003641409.4,XM_004941933.3,XM_004941932.3,XM_003641410.4	XP_003641458.1|0.0e+00|PREDICTED: B-cell lymphoma/leukemia 11B isoform X1 [Gallus gallus]
429286	0.143	0.04	-2.20517	1.05743e-06	1.41798e-06	USP13	XM_025153411.1,XM_025153412.1,NM_001305103.1	NP_001292032.1|0.0e+00|ubiquitin carboxyl-terminal hydrolase 13 [Gallus gallus]
415984	1.243	0.263	-2.21384	3.02278e-57	1.27868e-57	WNK2	XM_015293423.2,XM_015293426.2,XM_015293422.2,XM_025154641.1,XM_025154642.1,XM_025154646.1,XM_025154643.1,XM_015293427.2,XM_025154639.1,XM_015293431.2,XM_025154644.1,XM_025154645.1,XM_015293432.2,XM_025154640.1	XP_015148908.1|0.0e+00|PREDICTED: serine/threonine-protein kinase WNK2 isoform X5 [Gallus gallus]
769421	6.103	1.31	-2.21704	9.50456e-136	2.278e-136	HS3ST3B1L	XM_015295253.2,XM_003642322.4	XP_003642370.3|5.2e-200|PREDICTED: heparan sulfate glucosamine 3-O-sulfotransferase 3B1 isoform X1 [Gallus gallus]
396402	9.513	2.056	-2.22163	0	0	EPHA3	XM_015295857.2,NM_205430.2	XP_021257108.1|0.0e+00|ephrin type-A receptor 3 isoform X1 [Numida meleagris]
771342	0.216	0.046	-2.22725	7.71911e-18	6.4584e-18	FAM124B	XM_001234633.5	XP_001234634.2|6.3e-250|PREDICTED: protein FAM124B [Gallus gallus]
417458	0.243	0.05	-2.23445	0.000275136	0.000446043	ANGPTRL2	XM_415706.6,XM_004949979.3	XP_004950036.2|6.0e-184|PREDICTED: fibrinogen-like protein 1-like protein isoform X2 [Gallus gallus]
100858625	0.116	0.023	-2.23759	9.96653e-06	1.42577e-05	CLMN	XM_015287775.2	XP_015143261.1|0.0e+00|PREDICTED: calmin [Gallus gallus]
107049127	0.143	0.033	-2.23759	0.000618144	0.00103579	SERPINA3/4L	XM_015287770.2,XM_015287772.2,XM_015287769.2	XP_015143255.1|7.1e-242|PREDICTED: serpin A3-4-like isoform X1 [Gallus gallus]
415396	0.106	0.02	-2.23759	3.92784e-05	5.87131e-05	FAM81A	XM_015278922.2,XM_025154019.1,XM_015278920.2,XM_015278919.2,XM_015278924.2	XP_015134410.1|1.7e-199|PREDICTED: protein FAM81A isoform X5 [Gallus gallus]
420326	0.223	0.05	-2.23759	0.000154769	0.000244602	OC90	XM_015283130.2,XM_015283131.2,XM_015283129.2,XM_015283124.2,XM_015283126.2,XM_003640875.3,XM_015283125.2	XP_015138611.1|0.0e+00|PREDICTED: otoconin-90 isoform X2 [Gallus gallus]
431043	0.556	0.116	-2.23759	9.96653e-06	1.42577e-05	TUBB3	NM_001031598.1	XP_020845125.1|1.1e-261|tubulin beta-3 chain [Phascolarctos cinereus]
771221	0.306	0.066	-2.23759	8.71117e-13	8.68093e-13	RNF182	XM_004939637.3,XM_004939636.3,XM_015275959.2	OXB84527.1|7.1e-143|hypothetical protein H355_008003 [Colinus virginianus]
419191	0.853	0.18	-2.24445	1.00914e-21	7.59371e-22	KCNK15	XM_417369.6	XP_021272732.1|2.0e-226|potassium channel subfamily K member 15 [Numida meleagris]
422147	42.653	8.963	-2.24609	0	0	LOC422147	XM_025149826.1	XP_420148.2|2.8e-217|PREDICTED: putative P2Y purinoceptor 10 [Gallus gallus]
770907	10.083	2.096	-2.24702	8.59479e-110	2.37618e-110	KCNMB2	XM_015291506.2,XM_004943460.3,XM_004943462.3,XM_004943459.3,BGI_novel_T005320,XM_001233102.5,XM_004943461.3	XP_004943518.1|9.2e-131|PREDICTED: calcium-activated potassium channel subunit beta-2 isoform X4 [Gallus gallus]
395453	3.596	0.816	-2.24824	1.13118e-17	9.51374e-18	FGF18	XM_015293589.2,XM_015293588.2,NM_204714.1,XM_015293590.2	XP_015149076.1|1.9e-116|PREDICTED: fibroblast growth factor 18 isoform X3 [Gallus gallus]
420651	3.61	0.83	-2.24824	1.48267e-81	4.95898e-82	ZNF385D	XM_025147465.1,XM_015281802.2,XM_015281800.2,BGI_novel_T001369	XP_015137286.1|2.7e-299|PREDICTED: zinc finger protein 385D isoform X1 [Gallus gallus]
423417	3.07	0.656	-2.24946	2.22854e-73	7.91225e-74	RIN3	XM_004941878.3,BGI_novel_T003772,XM_421327.6,XM_015287751.2	XP_015143237.1|0.0e+00|PREDICTED: ras and Rab interactor 3 isoform X2 [Gallus gallus]
101750381	2.456	0.533	-2.24967	4.30459e-119	1.13013e-119	KIAA0408	XM_025149145.1,BGI_novel_T002336,XM_025149144.1	XP_015139937.1|1.2e-301|PREDICTED: uncharacterized protein KIAA0408 homolog isoform X3 [Gallus gallus]
396236	1.706	0.37	-2.256	8.55269e-67	3.23924e-67	DMD	NM_205299.2,BGI_novel_T000750	XP_011578498.1|0.0e+00|PREDICTED: dystrophin isoform X4 [Aquila chrysaetos canadensis]
BGI_novel_G000088	0.783	0.163	-2.25713	2.01388e-29	1.28393e-29	BGI_novel_G000088	BGI_novel_T002964
422374	7.793	1.633	-2.258	4.96092e-237	7.88888e-238	KIAA1210	BGI_novel_T002728,XM_004940845.3,XM_015278634.2,XM_025150177.1,XM_420344.6,XM_004940844.3	XP_004940901.1|0.0e+00|PREDICTED: uncharacterized protein KIAA1210 homolog isoform X1 [Gallus gallus]
[truncated: 372 more rows]
