# Supplementary material for: Integrated Transcriptomic and Proteomic Analyses of the Interaction Between Chicken Synovial Fibroblasts and Mycoplasma synoviae
Source: Front Microbiol. 2020 Apr 3;11:576. doi: 10.3389/fmicb.2020.00576 (PMC7147270; doi:10.3389/fmicb.2020.00576)
Supplement: Supplementary file 8 [file Table_7.XLSX]

## Sheet: Table S7
Supplementary Table S7. Genes and proteins that identified at both transcriptome and proteome levels
GeneID	Protein accession	Protein description	MW [kDa]	Coverage [%]	Peptides	PSMs	Unique peptides	Mock1	Infected1	Mock2	Infected2	Mock3	Infected3	Infected/Mock Ratio	log2 ratio of protein	Infected/Mock p value
408034	NP_001001201.1	hydroxysteroid 11-beta-dehydrogenase 1-like protein precursor [Gallus gallus]	31.478	12.2	3	5	3	0.927	1.093	1.143	0.93	0.979	0.939	0.971	-0.0424568	0.75122
408047	NP_001001315.2	thymosin beta-4 [Gallus gallus]	5.0526	45.5	4	7	4	1.106	0.719	1.053	0.86	1.293	0.972	0.739	-0.436354	0.04614
408253	NP_001001328.1	vitamin K epoxide reductase complex subunit 1-like protein 1 [Gallus gallus]	19.765	7.4	1	1	1
374102	NP_001001462.1	syndecan-2 precursor [Gallus gallus]	22.056	8.5	2	2	2
395226	NP_001001468.1	interferon-related developmental regulator 1 [Gallus gallus]	48.811	9.9	4	4	4	0.976	1.015	1.042	0.93	1.061	0.989	0.953	-0.0694519	0.25412
395315	NP_001001469.1	trifunctional purine biosynthetic protein adenosine-3 [Gallus gallus]	106.54	25.3	20	25	20	1.038	0.944	1.019	0.985	1.036	1.012	0.951	-0.0724828	0.07366
396006	NP_001001471.1	caveolae-associated protein 1 [Gallus gallus]	40.432	29.9	11	21	11	1.092	0.99	1.148	0.901	1.054	0.889	0.844	-0.244685	0.0153969
414142	NP_001001529.1	prolyl 3-hydroxylase 1 precursor [Gallus gallus]	81.675	25.4	15	30	15	1.019	0.996	0.991	1.01	0.98	1.02	1.012	0.0172093	0.42246
414144	NP_001001531.1	RNA-binding protein FUS [Gallus gallus]	52.36	14.9	9	14	7	1.043	0.984	0.964	1.042	0.977	1.009	1.017	0.0243197	0.58902
414798	NP_001001748.1	cytochrome b5 [Gallus gallus]	15.545	31.2	3	6	3	0.921	1.172	0.909	1.106	0.878	0.994	1.208	0.27262	0.020498
414830	NP_001001750.2	beta-2-microglobulin precursor [Gallus gallus]	13.042	11.8	1	1	1		0.855		0.97	1.069	1.111	0.915	-0.128156
414832	NP_001001751.1	cytochrome P450 family 3 subfamily A member 5 [Gallus gallus]	58.217	5.7	3	3	3	0.501	1.459	0.53	1.732	0.501	1.264	2.908	1.54003	0.00033905
414879	NP_001001765.1	ubiquitin-like modifier-activating enzyme 5 [Gallus gallus]	44.178	16.6	4	9	4	0.98	0.97	0.974	0.994	1.031	1.036	1.005	0.0071955	0.85956
414881	NP_001001767.2	E3 ubiquitin-protein ligase RNF114 [Gallus gallus]	25.196	8.9	1	1	1	0.907	0.846	1.088	1.086	0.978	1.095	1.018	0.0257376	0.89632
414782	NP_001001783.1	40S ribosomal protein S13 [Gallus gallus]	17.222	56.3	9	28	9	0.965	1.063	0.972	1.034	0.97	1.011	1.069	0.0962619	0.045141
414780	NP_001001785.1	xylosyltransferase 2 [Gallus gallus]	97.131	4.1	3	3	2	0.937	1.08	1.011	1.061	0.966	0.959	1.064	0.0894982	0.2298
415797	NP_001004371.1	cadherin-11 precursor [Gallus gallus]	87.572	18.3	12	16	12	1.141	0.793	1.173	0.854	1.172	0.836	0.712	-0.490051	0.000140295
415803	NP_001004372.1	glycine cleavage system H protein, mitochondrial precursor [Gallus gallus]	18.01	18.3	2	6	2	1.014	1.032	1.021	1.028	0.93	0.976	1.024	0.0342157	0.52686
417044	NP_001004378.1	receptor of activated protein C kinase 1 [Gallus gallus]	35.076	75.1	17	54	17	1.003	1.076	0.954	0.995	0.939	1.027	1.07	0.0976108	0.089679
417158	NP_001004379.1	60S ribosomal protein L7a [Gallus gallus]	29.999	48.9	17	44	17	0.967	1.041	0.974	1.074	0.948	1.019	1.085	0.117695	0.0092961
417771	NP_001004380.1	F-actin-capping protein subunit alpha-2 [Gallus gallus]	32.844	62.9	11	25	9	1.072	0.984	1.005	0.974	1.05	0.961	0.933	-0.100051	0.027558
418486	NP_001004389.2	T-complex protein 1 subunit theta [Gallus gallus]	59.501	61.5	33	96	33	0.974	1.045	0.954	1.035	0.961	1.021	1.073	0.10165	0.0014578
420883	NP_001004400.1	tubulin beta-2 chain [Gallus gallus]	49.953	57.3	19	129	1	0.976	0.88	1.006	1.013	1.122	1.017	0.937	-0.093879	0.36548
422743	NP_001004401.1	amidophosphoribosyltransferase precursor [Gallus gallus]	56.257	4.7	2	3	2	1.083	0.958	1.044	0.952	0.992	0.981	0.927	-0.109359	0.049485
422842	NP_001004402.1	WD repeat-containing protein 1 [Gallus gallus]	66.566	55	28	66	28	1.029	0.922	0.996	0.964	1.07	0.985	0.928	-0.107803	0.057502
424230	NP_001004407.1	glycophorin-C [Gallus gallus]	10.071	38.7	3	5	3	1.06	0.988	1.112	0.969	1.049	0.845	0.87	-0.200913	0.054084
424971	NP_001004410.1	phosphatidylinositol 4,5-bisphosphate 3-kinase catalytic subunit alpha isoform [Gallus gallus]	124.29	2.2	2	3	2	1.065	0.996	1.001	0.944	0.974	1.026	0.976	-0.0350469	0.53242
425002	NP_001004411.1	neuroserpin precursor [Gallus gallus]	46.529	18	7	10	7	0.984	0.959	1.019	1.028	0.953	1.007	1.013	0.0186342	0.67576
426905	NP_001004413.2	nicastrin precursor [Gallus gallus]	79.561	10.3	7	8	7	1.052	0.965	0.994	0.951	1.039	0.996	0.944	-0.0831412	0.058622
423178	NP_001004766.1	alpha-(1,6)-fucosyltransferase [Gallus gallus]	66.348	9.6	5	5	5	1.013	0.944	1.044	1.056	1.064	1.01	0.964	-0.0528949	0.35648
448832	NP_001004768.1	cell surface glycoprotein MUC18 precursor [Gallus gallus]	69.074	12	6	8	6	1.001	0.876	1.171	0.874	1.198	0.791	0.754	-0.407364	0.0130021
416362	NP_001005345.2	PDZ and LIM domain protein 7 [Gallus gallus]	46.041	38.7	15	30	15	0.988	1.005	0.936	1.009	1.007	1.031	1.039	0.0551957	0.173064
419088	NP_001005346.1	tsukushin precursor [Gallus gallus]	40.71	4.6	1	1	1	0.902	0.871	1.101	1.052	1.053	1.03	0.966	-0.0499049	0.70788
419485	NP_001005618.1	procollagen-lysine,2-oxoglutarate 5-dioxygenase 1 precursor [Gallus gallus]	84.317	41.9	29	70	27	1.01	1.02	1.039	0.98	0.978	0.972	0.982	-0.0262051	0.47112
395127	NP_001005791.1	cell death regulator Aven [Gallus gallus]	38.638	5.1	2	2	2	0.999	1.068	1.053	0.932	0.964	0.99	0.991	-0.013043	0.84888
415334	NP_001005802.1	signal peptidase complex catalytic subunit SEC11A [Gallus gallus]	20.631	24	6	10	6	0.932	1.01	0.959	1.059	0.953	1.016	1.085	0.117695	0.0092404
415421	NP_001005813.1	tropomodulin-3 [Gallus gallus]	39.365	42.3	15	26	15	0.948	0.995	1.015	1.027	0.992	1.016	1.028	0.0398403	0.27392
415498	NP_001005821.1	28S ribosomal protein S11, mitochondrial [Gallus gallus]	19.41	38.3	4	4	4	1.071	1.049	0.965	1.013	0.833	1.066	1.09	0.124328	0.28646
415523	NP_001005823.1	U2 small nuclear ribonucleoprotein A' [Gallus gallus]	28.43	28.6	8	14	8	1.019	0.982	1.044	1.021	0.957	0.989	0.991	-0.013043	0.77358
415544	NP_001005827.1	ras-related protein Rab-11A [Gallus gallus]	24.438	46.3	10	15	1
415627	NP_001005833.1	cilia- and flagella-associated protein 20 [Gallus gallus]	22.734	20.7	4	5	4	0.969	1.054	0.93	1.064	0.948	1.042	1.11	0.15056	0.00142452
415637	NP_001005834.2	anamorsin [Gallus gallus]	32.889	23.1	5	6	5	1.001	0.96	0.955	1.056	0.927	1.095	1.079	0.109695	0.171698
415703	NP_001005837.1	hydroxysteroid dehydrogenase-like protein 1 [Gallus gallus]	37.607	5.4	2	2	2
415730	NP_001005839.1	bromodomain-containing protein 7 [Gallus gallus]	74.021	2.8	1	1	1
415742	NP_001005840.1	T-cell immunomodulatory protein precursor [Gallus gallus]	66.796	3.7	2	2	2	1.044	1.033	1.049	1.025	0.966	0.9	0.967	-0.0484122	0.54018
415744	NP_001005841.1	dnaJ homolog subfamily A member 2 [Gallus gallus]	45.64	34.3	14	24	14	0.974	1.036	0.943	1.037	0.943	1.063	1.097	0.133564	0.0025242
415750	NP_001005842.1	vacuolar protein sorting-associated protein 35 [Gallus gallus]	91.706	36.2	29	44	29	1.048	0.944	0.991	0.961	1.057	1	0.938	-0.0923402	0.074003
415752	NP_001005843.1	cytochrome b-c1 complex subunit Rieske, mitochondrial precursor [Gallus gallus]	29.386	13.6	3	4	3	1.01	0.956	0.958	1.088	0.988	1.011	1.033	0.0468403	0.47628
415783	NP_001006128.1	glucose-6-phosphate isomerase [Gallus gallus]	62.216	36.9	20	53	17	0.985	0.928	0.963	1.01	1.056	1.058	0.997	-0.00433459	0.94692
415792	NP_001006129.1	NEDD8-activating enzyme E1 regulatory subunit [Gallus gallus]	60.483	25.6	10	17	10	1.066	0.926	1.034	0.961	1.065	0.964	0.901	-0.150401	0.0030619
415817	NP_001006130.1	ubiquitin carboxyl-terminal hydrolase 10 [Gallus gallus]	86.555	18.7	12	16	12	0.952	1.065	0.903	1.056	0.943	1.069	1.14	0.189034	0.00139963
415876	NP_001006131.1	dihydroorotate dehydrogenase (quinone), mitochondrial precursor [Gallus gallus]	41.397	17.3	7	8	7	0.977	1	1.041	1.014	1.018	0.963	0.981	-0.027675	0.46422
415937	NP_001006134.1	ubiquitin carboxyl-terminal hydrolase 4 [Gallus gallus]	107.47	16.9	13	16	13	0.987	0.992	1.009	1.024	1.007	1.032	1.015	0.0214797	0.35044
415942	NP_001006135.1	WD repeat-containing protein 82 [Gallus gallus]	35.105	18.8	6	8	6	0.993	0.979	1.058	0.945	0.98	1.015	0.97	-0.0439433	0.38342
415974	NP_001006136.1	acyl-CoA dehydrogenase family member 9, mitochondrial [Gallus gallus]	67.635	39.4	26	46	26	1.003	0.995	1.023	0.982	1.017	0.99	0.975	-0.0365259	0.022498
416027	NP_001006139.1	DNA replication licensing factor MCM2 [Gallus gallus]	100.35	23.4	18	24	18	0.967	1.056	0.921	1.005	0.965	1.058	1.093	0.128293	0.0183362
416087	NP_001006141.1	succinate--CoA ligase [GDP-forming] subunit beta, mitochondrial [Gallus gallus]	46.76	28.7	10	12	10	1.006	1.038	1.015	0.997	0.968	1.004	1.017	0.0243197	0.4335
416110	NP_001006143.1	ER degradation-enhancing alpha-mannosidase-like protein 1 [Gallus gallus]	69.081	4.1	2	2	2
416132	NP_001006144.1	histidyl-tRNA synthetase, cytoplasmic [Gallus gallus]	56.455	32.6	19	28	10	1.052	0.962	1	0.953	1.054	0.988	0.935	-0.0969617	0.029496
416133	NP_001006145.1	protein Red [Gallus gallus]	64.924	24.1	10	10	10	0.968	1.059	1	1.091	0.919	0.955	1.076	0.105678	0.2033
416157	NP_001006146.1	pre-mRNA-splicing factor SLU7 [Gallus gallus]	65.364	6.7	3	3	3	1.018	1.035	1.034	1.05	0.961	0.918	0.997	-0.00433459	0.92804
416183	NP_001006147.1	stress-70 protein, mitochondrial precursor [Gallus gallus]	73.191	46.8	34	88	33	1.018	1.014	1.007	0.995	0.979	0.977	0.994	-0.00868224	0.7244
416265	NP_001006150.1	ras GTPase-activating protein-binding protein 1 [Gallus gallus]	52.44	30.9	12	22	2	1.018	1.063	0.946	1.027	0.948	1.007	1.064	0.0894982	0.098215
416270	NP_001006151.1	pre-mRNA-splicing factor RBM22 [Gallus gallus]	46.776	21.7	8	9	8	0.942	1.058	0.976	1.066	0.906	1.042	1.121	0.164786	0.0069997
416318	NP_001006152.1	serine/threonine-protein phosphatase 2A catalytic subunit alpha isoform [Gallus gallus]	35.564	49.8	13	28	2	1.013	1.03	0.985	0.983	1.028	0.989	0.992	-0.011588	0.6988
416321	NP_001006154.2	keratinocyte-associated transmembrane protein 2 precursor [Gallus gallus]	30.468	7.6	2	2	2	1.022	1.018	0.964	1.008	0.921	1.069	1.065	0.0908534	0.146525
416341	NP_001006156.1	glucosamine-6-phosphate isomerase 1 [Gallus gallus]	32.264	16.7	4	7	3	1.175	0.792	0.984	0.899	1.094	1.065	0.847	-0.239566	0.163543
416433	NP_001006158.1	vacuolar fusion protein CCZ1 homolog [Gallus gallus]	55.207	10.3	4	6	4	1.008	1.02	0.999	1.007	1.024	0.957	0.984	-0.0232698	0.4852
416450	NP_001006159.1	Golgi to ER traffic protein 4 homolog [Gallus gallus]	34.648	13.5	4	6	4	0.971	0.999	0.9	1.058	0.997	1.058	1.086	0.119024	0.082856
416467	NP_001006160.2	7,8-dihydro-8-oxoguanine triphosphatase [Gallus gallus]	18.07	55.1	7	9	7	1.018	0.928	1.031	0.958	1.069	1.002	0.926	-0.110916	0.044703
416504	NP_001006163.1	COP9 signalosome complex subunit 3 [Gallus gallus]	47.962	37.6	13	18	13	0.949	1.023	0.958	1.037	1.033	1.026	1.05	0.0703893	0.21184
416545	NP_001006166.1	transducin beta-like protein 3 [Gallus gallus]	90.55	19.1	14	18	14	0.976	1.068	1.014	1	0.987	0.999	1.03	0.0426443	0.30174
416565	NP_001006167.2	leucine carboxyl methyltransferase 1 [Gallus gallus]	37.662	14.3	5	5	5	1.039	0.978	1.04	0.903	1.026	1.02	0.934	-0.0985055	0.194439
416604	NP_001006171.1	ADP-ribosylation factor-like protein 6-interacting protein 1 [Gallus gallus]	23.566	4.9	1	2	1	1.093	0.898	0.977	0.956	1.036	1.048	0.934	-0.0985055	0.281
416666	NP_001006175.1	heat shock protein 75 kDa, mitochondrial [Gallus gallus]	79.676	25.9	15	24	14	1.029	0.963	1.065	0.996	1.023	0.967	0.939	-0.0908029	0.0183794
416670	NP_001006176.1	coronin-7 [Gallus gallus]	100.17	4.8	4	4	4	1.051	0.993	0.996	1.019	1.039	0.921	0.95	-0.0740006	0.2093
416715	NP_001006177.1	adipocyte plasma membrane-associated protein [Gallus gallus]	46.115	30.1	10	13	10	0.951	1.025	1.039	0.967	0.995	1.017	1.008	0.0114956	0.8039
416718	NP_001006178.1	sorting nexin-5 [Gallus gallus]	34.58	9.4	3	3	3	0.956	0.932	0.922	1.076	1.153	0.984	0.987	-0.018878	0.9093
416769	NP_001006180.1	ubiquitin-conjugating enzyme E2 L3 [Gallus gallus]	17.861	32.5	6	9	6	1.043	0.824	1.023	0.915	1.124	0.995	0.857	-0.222633	0.06418
416787	NP_001006183.1	ran-specific GTPase-activating protein [Gallus gallus]	24.171	41.3	7	14	7	0.944	0.991	0.96	1.01	1.021	1	1.026	0.0370307	0.34452
416811	NP_001006184.1	acetoacetyl-CoA synthetase [Gallus gallus]	74.369	25.6	18	34	18	1.036	0.909	1.059	0.904	1.123	0.965	0.863	-0.212568	0.0099782
416821	NP_001006186.1	transmembrane emp24 domain-containing protein 2 precursor [Gallus gallus]	22.602	31.3	7	24	7	0.962	1.071	1.033	1.008	1.002	1.025	1.036	0.051024	0.26894
416853	NP_001006189.1	26S proteasome non-ATPase regulatory subunit 9 [Gallus gallus]	22.729	14.5	3	4	3	1.034	1.11	0.943	0.93	1.076	0.927	0.972	-0.0409718	0.68886
416872	NP_001006190.1	serine/threonine-protein phosphatase PP1-gamma catalytic subunit [Gallus gallus]	36.999	39.3	11	28	1	1.044	0.979	1.054	0.934	1.146	0.868	0.857	-0.222633	0.02816
416969	NP_001006193.1	short-chain specific acyl-CoA dehydrogenase, mitochondrial [Gallus gallus]	44.614	26.4	9	12	9	0.939	1.032	0.993	1.001	1.005	1.032	1.044	0.0621217	0.138363
416975	NP_001006194.1	2-methoxy-6-polyprenyl-1,4-benzoquinol methylase, mitochondrial precursor [Gallus gallus]	35.178	3.5	1	2	1	0.984	1.097	0.996	0.952	0.996	0.986	1.02	0.0285692	0.71782
417019	NP_001006195.1	THO complex subunit 5 homolog [Gallus gallus]	80.58	9	6	7	6	0.993	0.994	0.966	1.076	0.951	0.967	1.044	0.0621217	0.29092
417144	NP_001006198.1	WD repeat-containing protein 5 [Gallus gallus]	36.565	14.1	4	4	4	1.011	1.18	0.987	0.966	1.001	0.979	1.042	0.0593553	0.62688
417197	NP_001006200.1	endophilin-B2 [Gallus gallus]	44.888	12.2	5	6	1
417226	NP_001006201.1	cyclin-dependent kinase 9 [Gallus gallus]	42.802	10.5	4	5	3
417254	NP_001006202.1	negative elongation factor B [Gallus gallus]	65.841	8	4	4	4	1.066	0.984	1.034	0.974	1.037	0.93	0.921	-0.118727	0.0140616
417286	NP_001006203.1	endothelial differentiation-related factor 1 homolog [Gallus gallus]	16.363	41.9	7	8	7	0.967	0.937	1.047	0.984	1.089	1.013	0.946	-0.0800879	0.25542
417363	NP_001006204.1	signal recognition particle subunit SRP68 [Gallus gallus]	68.817	40.9	21	33	21	0.955	1.001	0.975	1.027	1.002	1.035	1.045	0.0635029	0.063402
417405	NP_001006207.2	U3 small nucleolar RNA-associated protein 6 homolog [Gallus gallus]	70.856	13.2	7	8	7	0.905	1.038	0.97	1.046	1	0.996	1.071	0.0989585	0.104545
417423	NP_001006210.1	nucleolar protein 11 [Gallus gallus]	80.693	6.5	4	5	4	0.96	0.965	0.989	1.043	1.019	1.033	1.025	0.0356239	0.46732
417477	NP_001006211.1	ribosome maturation protein SBDS [Gallus gallus]	28.823	32.8	7	8	7	0.965	0.916	1.013	1.024	1.037	1.053	0.993	-0.0101344	0.86426
417484	NP_001006212.1	RCC1-like G exchanging factor-like protein [Gallus gallus]	49.362	1.5	1	1	1
417530	NP_001006215.2	DNA ligase 3 [Gallus gallus]	112.17	16.8	17	19	17	1.004	0.994	1.017	1.042	0.972	1.031	1.025	0.0356239	0.2817
417541	NP_001006216.1	T-complex protein 1 subunit zeta [Gallus gallus]	57.644	50.6	25	47	25	0.99	1.039	0.94	1.056	0.971	1.029	1.077	0.107018	0.0117627
417554	NP_001006219.1	14-3-3 protein epsilon [Gallus gallus]	29.174	75.3	24	82	21	1.009	0.969	0.978	0.992	1.052	1.021	0.981	-0.027675	0.51112
417591	NP_001006222.1	Golgi SNAP receptor complex member 1 [Gallus gallus]	27.735	13.2	3	4	3	1.055	0.963	1.091	1.013	1.049	0.852	0.885	-0.176251	0.077945
417615	NP_001006223.1	fatty aldehyde dehydrogenase [Gallus gallus]	54.01	26.9	12	19	1	0.979	0.928	0.925	1.085	1.027	1.064	1.05	0.0703893	0.4599
417716	NP_001006225.1	26S proteasome regulatory subunit 7 [Gallus gallus]	48.661	70.9	31	57	31	0.971	1.055	0.952	1.024	0.975	1.017	1.068	0.0949116	0.0080151
417811	NP_001006231.1	RNA polymerase II-associated protein 3 [Gallus gallus]	75.993	11.3	8	8	8	1.08	1.015	0.941	0.99	1.061	0.946	0.957	-0.0634092	0.43022
417912	NP_001006233.1	methionine aminopeptidase 2 [Gallus gallus]	53.023	23.8	8	8	8	1.133	1.069	1	0.91	1.005	0.985	0.945	-0.0816138	0.40512
417918	NP_001006234.1	leukotriene A-4 hydrolase [Gallus gallus]	69.324	32.2	18	25	18	1.011	0.918	1.039	0.963	1.084	0.979	0.913	-0.131313	0.030882
417923	NP_001006235.1	thymopoietin [Gallus gallus]	50.181	43.5	14	23	14	1.02	0.992	1.026	1.016	0.954	0.983	0.997	-0.00433459	0.92432
418014	NP_001006240.2	TGF-beta-activated kinase 1 and MAP3K7-binding protein 1 [Gallus gallus]	54.771	9.2	4	6	4	0.888	1.005	1.005	1.001	1.014	1.09	1.065	0.0908534	0.27792
418016	NP_001006241.1	60S ribosomal protein L3 [Gallus gallus]	46.085	44.4	24	58	24	0.966	1.077	0.98	1.037	0.929	1.014	1.088	0.121679	0.02384
418058	NP_001006243.1	DNA replication licensing factor MCM5 [Gallus gallus]	82.409	19.8	12	13	12	0.922	1.004	0.996	0.995	0.993	1.076	1.056	0.0786098	0.195724
418175	NP_001006247.2	serine-threonine kinase receptor-associated protein [Gallus gallus]	38.14	56.9	17	26	17	0.973	1.051	0.919	1.042	0.976	1.049	1.096	0.132248	0.043419
418176	NP_001006248.1	deoxyribose-phosphate aldolase [Gallus gallus]	34.795	21.7	6	8	6	0.95	0.794	1.026	1.019	1.145	0.978	0.894	-0.161653	0.29116
418261	NP_001006250.1	peptidyl-prolyl cis-trans isomerase FKBP4 [Gallus gallus]	50.431	53.8	23	37	23	0.933	1.057	0.903	1.079	0.956	1.077	1.151	0.202888	0.00138107
418398	NP_001006253.1	PEST proteolytic signal-containing nuclear protein [Gallus gallus]	19.131	19.1	3	4	3	1.03	1.014	1.022	1.022	0.906	1.01	1.03	0.0426443	0.53436
418595	NP_001006259.1	pyruvate dehydrogenase kinase 3 [Gallus gallus]	46.63	10.6	4	4	4	0.943	1.021	0.996	0.964	1.143	0.953	0.953	-0.0694519	0.50212
418597	NP_001006260.1	eukaryotic translation initiation factor 2 subunit 3 [Gallus gallus]	51.076	43.2	18	25	18	1.008	1.029	0.939	0.987	1.001	1.049	1.04	0.0565835	0.24678
418745	NP_001006266.2	PCI domain-containing protein 2 [Gallus gallus]	46.254	15.3	5	6	5	1.042	1.02	1.032	0.959	1.004	0.99	0.965	-0.0513992	0.159362
418765	NP_001006267.1	arginine and glutamate-rich protein 1 [Gallus gallus]	33.543	11.2	4	5	4	0.989	1.054	0.997	0.949	0.934	1.076	1.054	0.0758749	0.30296
418857	NP_001006271.2	succinate--CoA ligase [ADP-forming] subunit beta, mitochondrial [Gallus gallus]	49.997	34.8	17	26	17	0.993	1.018	1.009	1.002	0.992	0.995	1.007	0.0100637	0.46848
418871	NP_001006273.1	SPRY domain-containing protein 7 [Gallus gallus]	21.735	17.9	3	3	3	1.04	0.947	1.049	0.907	1.038	1.026	0.921	-0.118727	0.147641
419000	NP_001006280.1	mediator of RNA polymerase II transcription subunit 17 [Gallus gallus]	72.129	1.7	1	1	1
419039	NP_001006281.1	NADH dehydrogenase [ubiquinone] 1 alpha subcomplex subunit 9, mitochondrial [Gallus gallus]	43.079	22	7	12	7	0.917	1.087	1.023	1	1.018	0.994	1.042	0.0593553	0.42046
419053	NP_001006284.2	DNA polymerase delta subunit 3 [Gallus gallus]	50.75	4.8	2	2	2
419150	NP_001006286.1	charged multivesicular body protein 4b [Gallus gallus]	25.155	35.7	9	11	9	0.934	1.035	0.969	1.07	0.915	1.026	1.111	0.151859	0.0074987
419165	NP_001006287.1	intraflagellar transport protein 52 homolog [Gallus gallus]	42.735	5	1	1	1	0.951	0.912	0.899	1.003	1.18	1.069	0.985	-0.0218044	0.918
419190	NP_001006289.1	14-3-3 protein beta/alpha [Gallus gallus]	27.907	49.2	12	50	4	1.052	0.947	1.013	0.989	1.062	0.985	0.934	-0.0985055	0.027083
419194	NP_001006290.1	adenosine deaminase [Gallus gallus]	40.678	2.5	1	1	1
419308	NP_001006293.1	probable ATP-dependent RNA helicase DDX27 [Gallus gallus]	85.656	16.2	12	13	12	1.05	0.989	1.09	0.983	1.005	0.906	0.915	-0.128156	0.072601
419312	NP_001006294.1	negative elongation factor C/D [Gallus gallus]	65.665	13.6	6	7	6	1.06	0.918	1.048	0.95	1.024	0.997	0.915	-0.128156	0.026217
419317	NP_001006296.1	vesicle-associated membrane protein-associated protein B/C [Gallus gallus]	27.273	52.7	12	23	11	1.035	1.024	1.016	0.985	0.961	1.01	1.002	0.00288251	0.91966
419329	NP_001006297.2	protein RTF2 homolog [Gallus gallus]	34.182	6.9	2	2	2
419423	NP_001006302.1	45 kDa calcium-binding protein [Gallus gallus]	39.171	28.3	10	12	10	1.026	1.076	1.029	0.933	1.02	0.9	0.946	-0.0800879	0.39606
419450	NP_001006303.1	6-phosphogluconate dehydrogenase, decarboxylating [Gallus gallus]	53.292	40.6	21	36	21	1.01	0.947	0.984	0.978	1.057	1.019	0.965	-0.0513992	0.29664
419535	NP_001006306.1	charged multivesicular body protein 7 [Gallus gallus]	49.779	4.5	2	2	2
419549	NP_001006307.1	zinc finger protein 593 [Gallus gallus]	15.336	6.8	1	2	1
419556	NP_001006308.1	U5 small nuclear ribonucleoprotein 40 kDa protein [Gallus gallus]	41.46	20.9	7	9	7	1	1.065	1.008	1.031	0.917	1.013	1.063	0.0881416	0.14072
419570	NP_001006309.3	heterogeneous nuclear ribonucleoprotein R [Gallus gallus]	71.019	40.8	25	54	18	1.026	1.014	1.046	0.972	0.99	0.985	0.97	-0.0439433	0.21436
419711	NP_001006316.2	etoposide-induced protein 2.4 homolog [Gallus gallus]	39.054	7.7	3	5	3	1.01	1.076	0.986	1.015	0.942	0.981	1.046	0.0648829	0.26096
419727	NP_001006317.2	amyloid-like protein 2 precursor [Gallus gallus]	86.107	8.5	6	8	6	0.931	0.945	1.088	1.126	1.054	1.027	1.008	0.0114956	0.91632
419788	NP_001006320.1	trafficking protein particle complex subunit 4 [Gallus gallus]	24.293	27.9	5	5	5	1.012	0.965	1.002	1.015	1.018	0.999	0.983	-0.0247367	0.31706
419793	NP_001006321.1	succinate dehydrogenase [ubiquinone] cytochrome b small subunit, mitochondrial [Gallus gallus]	16.435	5.1	1	1	1	0.866	0.904	1.169	1.224	1.075	0.796	0.94	-0.0892673	0.67428
419887	NP_001006324.2	suppressor of IKBKE 1 [Gallus gallus]	24.244	9.7	2	2	2	0.817	0.974	1.113	0.972	1.004	1.117	1.044	0.0621217	0.65572
419917	NP_001006325.1	nuclear transcription factor Y subunit alpha [Gallus gallus]	29.325	6.9	1	2	1	1.107	1.075	0.861	1.055	1.014	0.91	1.019	0.0271541	0.8209
419926	NP_001006327.1	mediator of RNA polymerase II transcription subunit 20 [Gallus gallus]	23.289	10.4	2	2	2
420032	NP_001006333.1	NF-kappa-B inhibitor-interacting Ras-like protein 2 [Gallus gallus]	21.502	6.3	1	2	1	0.889	1.102	0.911	1.032	0.969	1.099	1.168	0.22404	0.00972
420049	NP_001006336.1	major vault protein [Gallus gallus]	93.821	49.6	30	55	30	0.994	0.995	0.984	0.993	1.023	1.002	0.996	-0.00578235	0.78174
420055	NP_001006337.1	U6 snRNA-associated Sm-like protein LSm7 [Gallus gallus]	12.496	6.9	1	2	1
420117	NP_001006339.1	coatomer subunit epsilon [Gallus gallus]	34.369	39.9	13	28	13	0.977	1.016	1.031	0.999	0.983	0.967	0.997	-0.00433459	0.90194
420144	NP_001006341.2	calcium homeostasis endoplasmic reticulum protein [Gallus gallus]	101.92	15.8	10	11	10	0.959	1.135	0.994	0.985	0.898	0.976	1.086	0.119024	0.23012
420182	NP_001006345.1	60S ribosomal protein L7 [Gallus gallus]	28.78	51.2	14	55	14	0.975	0.995	1.007	1.001	0.967	1.024	1.024	0.0342157	0.190277
420222	NP_001006347.1	deubiquitinase OTUD6B [Gallus gallus]	34.542	14.9	3	4	3	0.994	1.021	0.972	1.02	1.009	0.996	1.021	0.0299829	0.20162
420237	NP_001006348.1	transcription termination factor 3, mitochondrial precursor [Gallus gallus]	45.633	2.7	1	1	1
420272	NP_001006349.1	eukaryotic translation initiation factor 3 subunit E [Gallus gallus]	52.135	34.8	15	27	15	0.974	1.052	0.964	0.961	0.976	1.048	1.05	0.0703893	0.24596
420350	NP_001006350.1	derlin-1 [Gallus gallus]	28.909	6.4	2	2	2	0.95	1.14	0.952	1.048	0.906	1.011	1.139	0.187768	0.029676
420458	NP_001006354.1	nucleolar GTP-binding protein 1 [Gallus gallus]	73.934	20.9	13	19	13	0.982	1.035	1.008	1.039	0.958	0.994	1.041	0.0579701	0.122058
420483	NP_001006355.1	ras-related protein Rab-18 [Gallus gallus]	22.954	55.8	10	14	10	0.971	1.028	0.986	1.022	0.987	1.01	1.039	0.0551957	0.0064573
420632	NP_001006362.1	3-hydroxyisobutyrate dehydrogenase, mitochondrial [Gallus gallus]	35.284	33	8	11	8	0.905	1.089	0.986	1.066	1.025	1.019	1.088	0.121679	0.108762
420686	NP_001006366.1	39S ribosomal protein L3, mitochondrial [Gallus gallus]	38.605	13.8	6	6	6	0.959	1.017	1.076	1.063	0.963	0.987	1.023	0.0328061	0.6138
420689	NP_001006367.1	acyl-CoA dehydrogenase family member 11 [Gallus gallus]	87.001	4.8	3	4	3
420871	NP_001006375.1	translocon-associated protein subunit alpha precursor [Gallus gallus]	32.186	22.6	4	11	4	0.969	1.003	1.013	1.074	0.96	1.035	1.058	0.0813396	0.095478
420901	NP_001006378.2	vacuolar protein sorting-associated protein 4B [Gallus gallus]	48.698	19.9	7	8	5	1.063	0.958	0.958	1.05	1.035	1.049	1	0	0.9935
420969	NP_001006382.1	fumarate hydratase, mitochondrial [Gallus gallus]	54.299	42.4	20	29	20	0.973	1.016	0.974	1.037	0.955	1.034	1.064	0.0894982	0.0024009
421013	NP_001006385.1	cytosolic non-specific dipeptidase [Gallus gallus]	53.078	32.4	12	22	12	1.02	0.954	0.943	0.992	1.05	1.048	0.994	-0.00868224	0.89276
421121	NP_001006388.1	39S ribosomal protein L15, mitochondrial precursor [Gallus gallus]	33.556	34	9	10	9	1.018	1.056	1.032	0.978	0.928	0.995	1.017	0.0243197	0.68848
421126	NP_001006389.1	trimethylguanosine synthase [Gallus gallus]	99.142	0.9	1	1	1
421127	NP_001006390.1	tyrosine-protein kinase Lyn [Gallus gallus]	56.202	11.8	5	8	4	0.99	0.946	1.184	0.815	1.174	0.879	0.789	-0.341903	0.031117
421145	NP_001006391.1	YTH domain-containing family protein 3 [Gallus gallus]	63.56	16.8	9	13	6	0.947	1.04	0.952	1.056	0.954	1.054	1.104	0.14274	4.3812e-05
421218	NP_001006393.2	proteasome activator complex subunit 4 [Gallus gallus]	199.08	3.4	5	5	5	0.777	1.194	0.655	1.245	0.669	1.429	1.841	0.88049	0.00133556
421281	NP_001006395.1	malate dehydrogenase, cytoplasmic isoform MDH1 [Gallus gallus]	36.543	38.9	13	21	13	1.049	0.976	1.024	0.968	1.025	1.009	0.953	-0.0694519	0.032365
421295	NP_001006396.1	WD repeat-containing protein 43 [Gallus gallus]	73.049	15.3	9	11	9	0.95	1.006	1.025	1.027	0.936	1.03	1.052	0.0731347	0.15056
421346	NP_001006397.1	isoleucine--tRNA ligase, mitochondrial precursor [Gallus gallus]	112.01	29.1	25	34	25	0.972	1.039	1.025	1.043	0.977	0.96	1.023	0.0328061	0.52502
421374	NP_001006399.1	integrator complex subunit 7 [Gallus gallus]	106.53	8.9	7	7	7	1.084	0.931	0.963	0.959	1.089	0.99	0.918	-0.123434	0.129165
421526	NP_001006403.2	translin-associated protein X [Gallus gallus]	33.243	12.4	3	4	3	0.965	1	0.988	1.04	1.005	1.011	1.031	0.0440443	0.135421
421531	NP_001006404.1	exocyst complex component 8 [Gallus gallus]	80.429	17.5	11	12	11	0.939	1.1	0.985	0.999	0.981	0.996	1.065	0.0908534	0.157759
421586	NP_001006405.1	T-complex protein 1 subunit alpha [Gallus gallus]	60.466	41.2	21	46	21	0.981	1.027	0.971	1.025	0.984	1.033	1.051	0.0717627	0.00044041
421602	NP_001006406.1	eukaryotic translation initiation factor 3 subunit M [Gallus gallus]	42.591	37.4	12	20	12	0.99	1.011	0.959	1.01	0.981	1.031	1.042	0.0593553	0.024377
421760	NP_001006407.1	pre-mRNA-processing factor 17 [Gallus gallus]	65.757	14.7	7	7	7	1.02	1.029	0.992	1.07	0.933	0.968	1.041	0.0579701	0.36154
421772	NP_001006408.1	sorting nexin-3 [Gallus gallus]	18.755	47.5	7	11	6	1.016	0.994	1.047	1.028	1.03	0.975	0.969	-0.0454314	0.148523
421785	NP_001006410.1	prolyl endopeptidase [Gallus gallus]	80.79	42.3	28	44	28	0.968	0.977	0.988	0.987	1.041	1.018	0.995	-0.00723157	0.85962
421792	NP_001006411.1	thiosulfate sulfurtransferase/rhodanese-like domain-containing protein 3 [Gallus gallus]	17.983	24.2	4	5	4	1.062	1.042	0.954	1.042	0.996	0.976	1.016	0.0229004	0.6901
421853	NP_001006412.1	high mobility group nucleosome-binding domain-containing protein 3 [Gallus gallus]	10.549	26.5	3	3	2
421895	NP_001006414.1	F-box only protein 9 [Gallus gallus]	50.637	5.1	2	3	2	0.958	0.961	0.925	1.079	1.09	1.003	1.024	0.0342157	0.70358
421985	NP_001006420.1	nuclear receptor-binding protein [Gallus gallus]	59.692	16.9	7	7	7	0.846	0.986	1.021	1.096	0.979	1.077	1.11	0.15056	0.180463
422043	NP_001006421.1	DNA replication licensing factor MCM3 [Gallus gallus]	91.25	19.7	15	19	15	0.975	1.073	0.969	0.965	0.977	1.028	1.05	0.0703893	0.26414
422108	NP_001006424.1	Na(+)/H(+) exchange regulatory cofactor NHE-RF1 [Gallus gallus]	35.805	12.6	3	3	3	0.776	1.263	0.737	1.295	0.718	1.2	1.684	0.751892	8.1464e-05
422120	NP_001006426.2	nuclear pore complex protein Nup85 [Gallus gallus]	77.051	17.7	11	13	11	1.019	0.982	1.011	0.983	0.981	1	0.985	-0.0218044	0.30436
422143	NP_001006428.1	charged multivesicular body protein 1b [Gallus gallus]	22.233	11.6	3	4	3	1.051	0.983	1.087	0.9	1.091	0.907	0.864	-0.210897	0.0086755
422214	NP_001006430.1	nuclear cap-binding protein subunit 2 [Gallus gallus]	19.33	9.5	2	2	1
422332	NP_001006435.1	magnesium transporter protein 1 precursor [Gallus gallus]	36.762	13.7	6	8	6	1.003	1.005	0.993	1.012	1.003	1.002	1.007	0.0100637	0.20948
422346	NP_001006436.1	NTF2-related export protein 2 [Gallus gallus]	16.162	5.7	1	1	1	0.945	1.013	0.97	1.023	0.986	1.068	1.07	0.0976108	0.0297
422423	NP_001006438.1	methylsterol monooxygenase 1 [Gallus gallus]	35.485	11.8	3	3	3	1.078	0.9	1.123	0.841	1.11	0.961	0.816	-0.293359	0.0071442
422462	NP_001006440.1	ATP-binding cassette sub-family E member 1 [Gallus gallus]	67.355	36.9	19	30	19	1.038	0.989	0.999	0.979	0.981	0.978	0.976	-0.0350469	0.23332
422501	NP_001006441.1	membrane-associated progesterone receptor component 2 [Gallus gallus]	21.641	47.7	8	13	7	0.987	1.008	1.014	1.006	0.939	1.028	1.035	0.0496308	0.216
422525	NP_001006442.1	oligosaccharyltransferase complex subunit OSTC [Gallus gallus]	16.743	12.8	2	5	2	0.96	1.117	0.996	1.049	0.959	0.975	1.078	0.108357	0.149983
422546	NP_001006443.1	ADP/ATP translocase 1 [Gallus gallus]	32.968	43.6	15	25	5	0.939	1.044	1.011	1.047	0.933	1.061	1.093	0.128293	0.026675
422558	NP_001006445.1	N(4)-(beta-N-acetylglucosaminyl)-L-asparaginase precursor [Gallus gallus]	36.63	29.9	8	15	8	1.013	1.007	1.016	0.998	1.041	0.944	0.961	-0.0573917	0.138798
422594	NP_001006447.1	COP9 signalosome complex subunit 4 [Gallus gallus]	46.785	54	16	25	16	0.995	0.98	0.955	1.063	0.981	1.019	1.045	0.0635029	0.175902
422621	NP_001006448.1	DNA-directed RNA polymerase II subunit RPB2 [Gallus gallus]	133.88	19.6	19	22	19	1.004	1.046	0.986	1.039	0.968	1.021	1.05	0.0703893	0.0186588
422676	NP_001006452.1	60S ribosomal protein L7-like 1 [Gallus gallus]	28.893	13	4	4	4	1.061	1.004	0.95	1.182	0.932	0.893	1.046	0.0648829	0.68096
422727	NP_001006453.1	acid ceramidase precursor [Gallus gallus]	44.643	28.9	11	18	11	1.038	0.985	1.029	0.986	0.984	0.933	0.952	-0.0709665	0.115222
422865	NP_001006458.1	grpE protein homolog 1, mitochondrial [Gallus gallus]	24.84	43.7	9	12	9	0.951	1.085	0.988	0.995	0.943	0.965	1.057	0.0799754	0.22762
422898	NP_001006461.2	mitochondrial proton/calcium exchanger protein [Gallus gallus]	86.138	37.1	27	40	27	0.959	0.978	0.991	1.056	0.97	1.01	1.042	0.0593553	0.164501
422912	NP_001006462.1	MICOS complex subunit MIC60 [Gallus gallus]	79.249	51.5	34	54	34	0.968	1.016	1.03	1.028	0.965	1.02	1.034	0.0482362	0.189499
422983	NP_001006465.1	glutamine-dependent NAD(+) synthetase [Gallus gallus]	79.226	5.2	2	2	2	0.87	1.005	1.136	1.067	0.904	1.021	1.063	0.0881416	0.47082
423062	NP_001006466.1	ras-related protein R-Ras2 [Gallus gallus]	23.237	44.3	10	13	10	1.022	0.961	1.068	0.966	1.024	0.986	0.935	-0.0969617	0.0152361
423092	NP_001006470.1	protein TSSC4 [Gallus gallus]	36.87	7.1	2	4	2	0.959	1.185	1.001	0.979	0.973	0.975	1.07	0.0976108	0.38556
423099	NP_001006471.1	toll-interacting protein [Gallus gallus]	30.54	33.6	8	11	8	0.962	1.032	0.998	0.966	1.036	1.009	1.004	0.00575927	0.90302
423111	NP_001006473.1	ribonuclease inhibitor [Gallus gallus]	49.863	55.5	20	64	20	0.936	1.01	0.89	1.1	0.965	1.101	1.15	0.201634	0.0195396
423168	NP_001006474.1	apoptosis inhibitor 5 [Gallus gallus]	58.608	38.2	17	25	17	0.997	0.959	1	1.021	0.975	1.004	1.004	0.00575927	0.863
423262	NP_001006475.1	enhancer of rudimentary homolog [Gallus gallus]	12.229	38.5	5	17	5	1.005	1.045	1.02	0.969	0.981	0.975	0.994	-0.00868224	0.82984
423279	NP_001006477.1	eukaryotic translation initiation factor 2 subunit 1 [Gallus gallus]	33.059	59	18	28	18	1.02	0.979	0.969	1.003	0.986	1.02	1.009	0.0129262	0.65954
423284	NP_001006478.1	signal recognition particle 14 kDa protein [Gallus gallus]	12.528	20.9	2	3	2	1.009	0.998	1.021	1.035	0.979	0.97	0.998	-0.00288828	0.92722
423359	NP_001006481.1	translation initiation factor eIF-2B subunit beta [Gallus gallus]	39.073	16.5	4	5	4	1.01	1.042	0.946	0.996	0.973	1.046	1.053	0.0745054	0.103896
423362	NP_001006482.1	transmembrane emp24 domain-containing protein 10 precursor [Gallus gallus]	24.803	43.8	10	37	10	0.954	1.054	1.002	1	0.964	1.016	1.051	0.0717627	0.081061
423379	NP_001006483.1	serine palmitoyltransferase 2 [Gallus gallus]	62.735	18.2	9	10	9	1.01	0.924	1.173	0.991	0.954	0.956	0.915	-0.128156	0.25934
423407	NP_001006484.2	tetratricopeptide repeat protein 7B [Gallus gallus]	94.469	3.2	2	2	2	0.816	1.029	1.206	0.861	1.215	0.895	0.86	-0.217591	0.39012
423542	NP_001006491.1	proteasome subunit alpha type-3 [Gallus gallus]	28.481	38	12	24	12	0.987	0.999	0.941	1.019	0.974	1.037	1.053	0.0745054	0.044863
423543	NP_001006492.1	actin-related protein 10 [Gallus gallus]	46.281	32.6	11	15	11	0.961	1.06	0.964	1.056	0.939	0.999	1.088	0.121679	0.0159847
423586	NP_001006494.1	26S proteasome regulatory subunit 10B [Gallus gallus]	44.173	62	19	41	19	0.998	1.059	0.99	1.048	0.966	1.029	1.062	0.0867838	0.0097786
423673	NP_001006496.1	gamma-tubulin complex component 2 [Gallus gallus]	102.78	12.1	9	11	9	0.997	1.003	0.982	1.048	0.97	1.064	1.056	0.0786098	0.048337
423697	NP_001006498.1	ATP-dependent RNA helicase SUPV3L1, mitochondrial precursor [Gallus gallus]	88.775	3.4	3	3	3	0.931	1.023	1.04	0.976	1.019	1.019	1.009	0.0129262	0.79676
423727	NP_001006500.1	DNA-directed RNA polymerase III subunit RPC1 [Gallus gallus]	155.7	1.8	2	2	2
423763	NP_001006502.1	NADH dehydrogenase [ubiquinone] 1 beta subcomplex subunit 8, mitochondrial precursor [Gallus gallus]	21.945	36.6	5	7	5	0.982	1.059	1.042	0.986	0.96	1.009	1.023	0.0328061	0.50924
423970	NP_001006507.1	serine/threonine-protein phosphatase 2A 55 kDa regulatory subunit B delta isoform [Gallus gallus]	52.015	19.5	7	10	2
423992	NP_001006510.1	zinc finger CCCH domain-containing protein 15 [Gallus gallus]	48.928	18.9	8	10	8	1.004	1.025	0.978	1.016	0.955	1.043	1.05	0.0703893	0.04028
424005	NP_001006511.1	long-chain specific acyl-CoA dehydrogenase, mitochondrial [Gallus gallus]	47.889	39.9	18	34	18	1.02	1.016	1.023	1.018	0.98	0.965	0.992	-0.011588	0.73554
424015	NP_001006512.1	NEDD8-conjugating enzyme UBE2F [Gallus gallus]	21.229	7	1	1	1
424037	NP_001006514.2	lanosterol synthase [Gallus gallus]	85.351	34.2	22	39	22	1.031	0.981	1.04	0.955	1.036	0.952	0.93	-0.104697	0.00175554
424073	NP_001006516.1	basic leucine zipper and W2 domain-containing protein 1 [Gallus gallus]	48.019	36.1	17	26	16	0.959	0.98	0.959	1.012	1.012	1.034	1.033	0.0468403	0.2453
424077	NP_001006517.1	origin recognition complex subunit 2 [Gallus gallus]	64.234	1.9	1	1	1	1.043	0.939	1.07	1.011	0.981	0.966	0.942	-0.086201	0.153362
424151	NP_001006519.2	cytoplasmic dynein 1 intermediate chain 2 [Gallus gallus]	68.301	23.8	8	11	8	0.95	0.948	0.947	1.011	1.068	1.029	1.008	0.0114956	0.8615
424212	NP_001006520.1	mitochondrial chaperone BCS1 [Gallus gallus]	47.47	6	2	2	2
424215	NP_001006521.2	CCR4-NOT transcription complex subunit 9 [Gallus gallus]	33.601	29.4	7	10	7	0.936	0.968	0.966	1.026	1.042	1.073	1.042	0.0593553	0.39974
424226	NP_001006523.2	general transcription and DNA repair factor IIH helicase subunit XPB [Gallus gallus]	89.061	9.9	6	7	6	0.949	1.046	0.993	0.932	0.964	1.113	1.064	0.0894982	0.3318
424295	NP_001006527.2	DNA replication licensing factor MCM6 [Gallus gallus]	93.302	22.3	16	20	16	1.026	1.118	0.962	0.961	0.907	1.025	1.072	0.100305	0.2886
424296	NP_001006528.1	aspartate--tRNA ligase, cytoplasmic [Gallus gallus]	57.203	49.3	23	30	23	1.005	1.028	0.952	1.037	0.988	1.019	1.047	0.0662614	0.050679
424413	NP_001006531.1	syntaxin-6 [Gallus gallus]	29.155	8.7	2	2	2	0.972	1.017	0.991	0.935	1.009	1.078	1.02	0.0285692	0.699
424522	NP_001006534.1	endophilin-B1 [Gallus gallus]	40.795	23.2	9	10	9	0.971	0.986	0.965	1.015	0.996	1.059	1.044	0.0621217	0.1376
424573	NP_001006537.1	importin-13 [Gallus gallus]	107.78	1.5	1	1	1	0.965	1.05	0.887	1.009	1.029	1.069	1.086	0.119024	0.144281
424574	NP_001006538.1	2-(3-amino-3-carboxypropyl)histidine synthase subunit 2 [Gallus gallus]	52.163	4	1	1	1
424599	NP_001006539.1	aldo-keto reductase family 1 member A1 [Gallus gallus]	37.076	42.5	13	18	13	1.031	0.932	1.045	0.922	1.109	0.984	0.891	-0.166503	0.0186801
424812	NP_001006543.1	phenylalanine--tRNA ligase beta subunit [Gallus gallus]	65.893	33.4	17	29	17	0.962	1.03	0.944	1.023	0.995	1.023	1.06	0.0840643	0.063397
424866	NP_001006544.1	uncharacterized protein LOC424866 [Gallus gallus]	28.586	16.9	2	2	2	1.006	0.986	1.073	1.061	0.966	0.922	0.975	-0.0365259	0.63592
424895	NP_001006548.1	arf-GAP with coiled-coil, ANK repeat and PH domain-containing protein 2 [Gallus gallus]	88.453	19.8	14	20	12	1.059	0.951	1.023	0.94	1.041	0.947	0.909	-0.137648	0.0008205
424897	NP_001006549.1	large subunit GTPase 1 homolog [Gallus gallus]	73.83	15.6	10	10	10	0.946	1.024	1.056	0.993	0.99	1	1.008	0.0114956	0.79448
424958	NP_001006550.1	replication factor C subunit 4 [Gallus gallus]	39.323	19.2	6	7	6	0.916	1.195	0.883	0.963	0.964	1.081	1.172	0.228973	0.081859
424962	NP_001006551.1	methylcrotonoyl-CoA carboxylase subunit alpha, mitochondrial [Gallus gallus]	78.414	6.2	4	4	4	0.962	0.961	0.981	0.976	1.063	1.064	0.998	-0.00288828	0.97042
424978	NP_001006553.1	NADH dehydrogenase [ubiquinone] 1 beta subcomplex subunit 5, mitochondrial precursor [Gallus gallus]	21.357	18.3	4	5	4	0.971	1.014	0.984	0.976	1.001	1.059	1.031	0.0440443	0.29228
425028	NP_001006556.1	GMP synthase [glutamine-hydrolyzing] [Gallus gallus]	76.633	34.1	18	28	18	0.976	1.03	1.022	0.983	0.987	0.996	1.008	0.0114956	0.70434
425041	NP_001006557.3	thioredoxin reductase-like selenoprotein T precursor [Gallus gallus]	22.318	5	1	1	1
425050	NP_001006558.1	glycogenin-1 [Gallus gallus]	37.214	28.6	9	11	3	0.983	1.093	0.871	0.93	1.032	1.022	1.055	0.077243	0.47684
425210	NP_001006559.1	ragulator complex protein LAMTOR3 [Gallus gallus]	13.68	8.1	1	3	1	0.955	0.984	1.074	0.939	1.083	0.979	0.933	-0.100051	0.188459
425543	NP_001006560.1	heterochromatin protein 1-binding protein 3 [Gallus gallus]	61.851	36.5	25	46	25	1.024	0.976	1.08	0.991	1.004	0.96	0.942	-0.086201	0.065298
426335	NP_001006566.1	dihydropteridine reductase [Gallus gallus]	24.894	40.3	7	10	7	1.035	0.903	1.069	0.881	1.127	0.954	0.847	-0.239566	0.0084019
426504	NP_001006568.1	ATP-dependent RNA helicase DDX19B [Gallus gallus]	53.901	28.4	10	13	10	0.861	1.051	0.938	1.049	0.969	1.139	1.17	0.226509	0.02392
426787	NP_001006570.1	golgin subfamily A member 7 [Gallus gallus]	15.762	27	3	3	3	1.051	1.31	0.687	1.132	0.763	1.059	1.4	0.485427	0.070378
426847	NP_001006571.1	3-ketoacyl-CoA thiolase, mitochondrial [Gallus gallus]	41.684	46.3	15	34	15	1.035	0.998	1.031	0.976	1.007	0.935	0.947	-0.0785637	0.0582
426988	NP_001006572.1	putative oxidoreductase GLYR1 [Gallus gallus]	60.601	12.8	6	6	6	1.062	0.965	1.041	1.01	0.983	0.937	0.944	-0.0831412	0.142597
427001	NP_001006573.1	RNA exonuclease 5 [Gallus gallus]	85.364	2.8	2	3	2	0.791	1.086	0.926	1.077	0.918	1.194	1.274	0.349365	0.0161242
427165	NP_001006577.2	trafficking protein particle complex subunit 13 isoform 2 [Gallus gallus]	46.025	13.6	4	5	4	1.077	0.844	1.073	1.011	1.065	0.946	0.871	-0.199255	0.116916
427190	NP_001006578.2	succinyl-CoA:3-ketoacid coenzyme A transferase 1, mitochondrial [Gallus gallus]	56.185	24.6	11	20	11	1.054	1.011	1.054	0.949	0.967	0.945	0.945	-0.0816138	0.192139
427206	NP_001006579.1	ribosome biogenesis protein NSA2 homolog [Gallus gallus]	30.052	10.4	3	3	3	0.983	1.014	0.964	0.967	1.088	0.999	0.982	-0.0262051	0.69194
427278	NP_001006581.2	serine/threonine-protein kinase RIO2 [Gallus gallus]	63.413	7.1	3	3	3	1.025	1.028	0.983	1.043	0.939	0.991	1.039	0.0551957	0.2603
427293	NP_001006582.1	endosomal/lysosomal potassium channel TMEM175 [Gallus gallus]	56.111	2.2	1	1	1	0.942	0.91	1.209	1.017	0.937	0.99	0.945	-0.0816138	0.60438
427307	NP_001006583.1	39S ribosomal protein L50, mitochondrial [Gallus gallus]	17.975	27.3	4	4	4	0.889	1.126	1.006	1.094	1.001	0.904	1.079	0.109695	0.4139
427389	NP_001006586.1	AP-3 complex subunit sigma-1 [Gallus gallus]	21.805	23.8	5	10	5	0.913	0.971	0.952	1.084	1.005	1.082	1.093	0.128293	0.125664
423504	NP_001006686.1	heat shock 70 kDa protein [Gallus gallus]	69.75	54.6	35	126	20	1.099	0.921	1.068	0.869	1.102	0.934	0.833	-0.263612	0.00166
395343	NP_001007474.1	dolichyl-diphosphooligosaccharide--protein glycosyltransferase subunit DAD1 [Gallus gallus]	12.926	39.8	4	8	4	0.971	1.039	0.985	1.05	1.005	0.984	1.038	0.0538064	0.176379
415551	NP_001007480.1	60S ribosomal protein L4 [Gallus gallus]	46.749	38.7	19	67	19	0.982	0.999	0.981	1.031	0.948	1.021	1.048	0.0676387	0.034079
428688	NP_001007491.1	apoptosis-inducing factor 1, mitochondrial [Gallus gallus]	64.521	35.4	14	18	14	0.988	1.023	1.006	1.022	0.957	0.993	1.029	0.041243	0.172004
395181	NP_001007824.1	40S ribosomal protein SA [Gallus gallus]	33.021	45.3	11	26	11	0.993	1.044	0.94	1.021	0.945	1.035	1.077	0.107018	0.0160984
415539	NP_001007829.1	very-long-chain (3R)-3-hydroxyacyl-CoA dehydratase [Gallus gallus]	42.835	10.5	4	5	4	0.991	1.09	1.048	0.976	0.948	0.959	1.013	0.0186342	0.82234
415610	NP_001007831.1	solute carrier family 25 member 46 [Gallus gallus]	44.641	10	3	3	3	0.673	1.014	1.485	1.061	0.917	0.86	0.954	-0.0679388	0.99002
416402	NP_001007834.1	cytosolic Fe-S cluster assembly factor NUBP2 [Gallus gallus]	29.358	14.3	3	4	3	0.845	1.064	0.915	1.172	0.872	1.13	1.279	0.355016	0.0025242
416955	NP_001007840.1	14-3-3 protein eta [Gallus gallus]	28.342	55.1	16	58	10	1.061	0.913	1.034	0.921	1.15	0.958	0.86	-0.217591	0.0132765
417221	NP_001007844.1	ubiquitin-related modifier 1 [Gallus gallus]	11.427	14.9	1	1	1
417701	NP_001007849.1	E3 ubiquitin-protein ligase Hakai [Gallus gallus]	54.85	9.7	4	4	3	0.959	1.167	0.897	1.022	0.972	0.994	1.126	0.171207	0.103502
417959	NP_001007854.1	probable ATP-dependent RNA helicase DDX47 [Gallus gallus]	50.244	21.4	8	12	8	0.952	1.06	0.959	0.975	1.005	1.038	1.054	0.0758749	0.160677
419235	NP_001007872.1	glucose-induced degradation protein 8 homolog [Gallus gallus]	26.814	40.4	7	11	7	0.976	1.053	1.005	1.097	0.921	1.023	1.093	0.128293	0.051961
419410	NP_001007876.1	RNA polymerase II subunit A C-terminal domain phosphatase SSU72 [Gallus gallus]	22.574	32	5	6	5	1.052	0.985	0.973	0.991	0.994	0.992	0.983	-0.0247367	0.55382
419971	NP_001007885.1	coiled-coil domain-containing protein 43 [Gallus gallus]	24.609	15.7	3	3	3	0.929	1.204	0.992	0.986	1.033	0.878	1.039	0.0551957	0.77154
420149	NP_001007887.1	AP-1 complex subunit mu-1 [Gallus gallus]	48.556	28.1	10	13	10	0.991	0.994	1	0.961	1.047	1.01	0.976	-0.0350469	0.34114
420187	NP_001007889.1	elongin-C [Gallus gallus]	12.473	54.5	5	11	5	0.997	1.046	0.967	0.988	0.965	1.003	1.037	0.0524159	0.146961
420558	NP_001007893.1	cyclin-dependent kinase 6 [Gallus gallus]	36.85	30.7	9	12	8	0.986	0.935	1.05	0.911	1.14	0.995	0.895	-0.16004	0.089615
421551	NP_001007906.1	proteasome subunit beta type-1 [Gallus gallus]	25.984	45.6	8	21	8	0.998	1	0.93	1.017	0.992	1.034	1.045	0.0635029	0.145621
422116	NP_001007914.1	BTB/POZ domain-containing protein KCTD2 [Gallus gallus]	27.064	6.5	1	1	1
422197	NP_001007918.1	55 kDa erythrocyte membrane protein [Gallus gallus]	52.519	14.7	6	6	6	1.126	1.02	1.086	0.933	1.073	0.838	0.85	-0.234465	0.047319
423211	NP_001007931.1	calcineurin B homologous protein 1 [Gallus gallus]	22.447	46.7	7	12	7	0.886	1.081	0.911	1.158	0.854	1.069	1.248	0.319618	0.0021001
423328	NP_001007936.1	breast cancer metastasis-suppressor 1-like protein [Gallus gallus]	37.766	14.9	4	5	4	1.043	1.042	1.022	0.916	0.885	1.087	1.032	0.045443	0.68624
423346	NP_001007938.1	protein lin-52 homolog [Gallus gallus]	12.366	13.4	1	1	1
423694	NP_001007945.1	KIF1-binding protein homolog [Gallus gallus]	69.081	12.8	7	7	7	0.966	0.928	1.03	1.085	0.984	1.011	1.015	0.0214797	0.80428
423862	NP_001007949.1	alpha-centractin [Gallus gallus]	42.645	31.1	9	25	9	1.002	1.047	0.96	1.036	0.983	1.01	1.05	0.0703893	0.039899
424492	NP_001007954.1	glutamate--cysteine ligase regulatory subunit [Gallus gallus]	30.262	38	8	12	8	1.064	0.914	0.874	0.919	1.29	0.941	0.859	-0.21927	0.34268
424499	NP_001007957.1	transmembrane emp24 domain-containing protein 5 precursor [Gallus gallus]	25.674	26.5	8	19	8	0.98	1.044	1.012	1.003	0.995	1.001	1.02	0.0285692	0.29098
425012	NP_001007964.1	importin subunit alpha-3 [Gallus gallus]	57.854	21.9	8	11	4	0.906	0.942	1.057	1.111	0.939	1.077	1.079	0.109695	0.33518
425073	NP_001007966.1	alpha-endosulfine [Gallus gallus]	12.725	20.5	2	5	1
427283	NP_001007976.1	sialic acid synthase [Gallus gallus]	40.144	29.8	8	13	8	1.048	0.984	0.979	0.929	1.092	1.008	0.937	-0.093879	0.17872
427377	NP_001007980.1	WD40 repeat-containing protein SMU1 [Gallus gallus]	57.497	23.2	11	13	11	1.004	0.987	0.983	1.01	1.03	1.022	1.001	0.00144197	0.96722
419169	NP_001008446.1	actin-related protein 5 [Gallus gallus]	69.353	3.9	2	2	2
419625	NP_001008451.1	trafficking protein particle complex subunit 3 [Gallus gallus]	20.276	28.9	6	6	6	0.992	0.932	0.975	1.015	1.008	0.997	0.99	-0.0144996	0.71022
421429	NP_001008459.1	BTB/POZ domain-containing protein 9 [Gallus gallus]	73.193	3.7	1	1	1	0.864	1.001	1.117	1.128	1.04	0.873	0.994	-0.00868224	0.95764
422087	NP_001008463.1	CDP-diacylglycerol--glycerol-3-phosphate 3-phosphatidyltransferase, mitochondrial precursor [Gallus gallus]	63.066	7.9	4	5	4	1.007	1.01	0.981	1.066	0.909	1.032	1.073	0.10165	0.108605
422376	NP_001008465.1	COMM domain-containing protein 5 [Gallus gallus]	24.904	15	3	3	3	1.021	1.107	1.009	0.891	1.032	0.954	0.964	-0.0528949	0.59208
422469	NP_001008468.1	transmembrane protein 184C [Gallus gallus]	50.93	3.4	2	2	2	0.966	1.012	1.002	1.074	0.991	0.97	1.033	0.0468403	0.37344
423440	NP_001008472.1	glutaredoxin-related protein 5, mitochondrial [Gallus gallus]	17.425	29	4	11	4	1.011	1.012	1.002	1.023	1.013	0.967	0.992	-0.011588	0.66326
424075	NP_001008475.1	peptidyl-prolyl cis-trans isomerase-like 3 [Gallus gallus]	18.051	11.8	1	2	1
424496	NP_001008478.1	protein Dr1 [Gallus gallus]	19.443	15.9	3	5	3	0.984	0.966	0.946	1.073	0.924	1.064	1.087	0.120352	0.09696
427425	NP_001008479.1	activated RNA polymerase II transcriptional coactivator p15 [Gallus gallus]	14.237	40.5	6	11	6	1.011	1.017	1.004	0.963	1.043	0.96	0.961	-0.0573917	0.147779
418274	NP_001008675.1	39S ribosomal protein L51, mitochondrial precursor [Gallus gallus]	16.781	7	1	1	1
418675	NP_001008680.1	protein XRP2 [Gallus gallus]	39.722	29.4	9	10	9	0.951	1.009	0.984	1.005	1.005	1.016	1.031	0.0440443	0.137415
421931	NP_001008682.1	disintegrin and metalloproteinase domain-containing protein 17 precursor [Gallus gallus]	93.605	4.6	4	4	4
427802	NP_001008789.1	cytoglobin [Gallus gallus]	20.517	31.3	6	6	6	0.376	1.18	0.365	1.82	0.382	1.815	4.288	2.1003	0.0099823
428310	NP_001010842.2	heat shock protein beta-9 [Gallus gallus]	20.755	21.2	2	2	2	1.091	0.907	1.092	0.825	0.84	1.223	0.978	-0.0320936	0.8495
423131	NP_001012292.1	polyribonucleotide 5'-hydroxyl-kinase Clp1 [Gallus gallus]	47.575	3.5	2	2	2	0.947	1.035	0.97	0.983	1.013	1.058	1.05	0.0703893	0.173877
373923	NP_001012539.1	CUGBP Elav-like family member 1 [Gallus gallus]	51.638	15.7	8	12	5	1.034	1.048	0.928	1.044	0.913	1.039	1.089	0.123004	0.1567
395416	NP_001012540.1	multidrug resistance-associated protein 1 [Gallus gallus]	170.97	19.5	26	34	26	0.945	0.991	0.986	1.045	0.958	1.037	1.064	0.0894982	0.041164
415843	NP_001012545.1	paraplegin [Gallus gallus]	86.082	11.2	7	7	7	1.014	1.116	1.013	1.057	0.862	0.947	1.08	0.111031	0.34504
416588	NP_001012547.1	3-phosphoinositide-dependent protein kinase 1 [Gallus gallus]	63.067	4.9	3	5	3	1.008	1.003	0.957	0.981	1.015	1.043	1.016	0.0229004	0.57642
417846	NP_001012551.1	T-complex protein 1 subunit beta [Gallus gallus]	57.431	63.6	31	79	31	0.973	1.028	0.969	1.016	0.966	1.022	1.054	0.0758749	0.000182846
418033	NP_001012553.1	eukaryotic translation initiation factor 3 subunit L [Gallus gallus]	66.682	41.1	23	40	23	0.995	1.047	0.961	1.014	0.988	1.025	1.048	0.0676387	0.02928
418063	NP_001012555.2	F-box only protein 7 [Gallus gallus]	58.386	8.6	4	4	4	1.085	0.893	1.151	0.854	1.08	0.948	0.813	-0.298673	0.0047182
418227	NP_001012558.1	tubulin--tyrosine ligase-like protein 12 [Gallus gallus]	72.869	24.1	12	14	12	1.005	0.978	1.015	0.999	1.037	1.018	0.98	-0.0291463	0.23806
418240	NP_001012559.1	nuclear pore complex protein Nup50 [Gallus gallus]	50.107	20.3	7	9	7	1.018	0.908	1.054	1.075	0.925	0.991	0.992	-0.011588	0.89752
418455	NP_001012560.1	protein O-glucosyltransferase 1 precursor [Gallus gallus]	45.782	19.9	8	14	8	1.014	0.981	1.014	0.987	1.027	1.029	0.981	-0.027675	0.28206
418520	NP_001012561.1	proteasome assembly chaperone 1 [Gallus gallus]	31.475	12.1	2	2	2
418610	NP_001012562.1	pyruvate dehydrogenase E1 component subunit alpha, somatic form, mitochondrial precursor [Gallus gallus]	44.442	39.8	16	27	16	0.966	1.002	1.003	1.027	0.984	1.023	1.034	0.0482362	0.067597
418632	NP_001012563.1	neuronal membrane glycoprotein M6-b [Gallus gallus]	29.59	4.8	1	1	1
419885	NP_001012567.1	GTPase NRas precursor [Gallus gallus]	21.278	39.2	6	11	2	1.017	0.968	0.988	0.973	1.041	1.023	0.973	-0.0394883	0.30374
420017	NP_001012568.1	proteasome activator complex subunit 3 [Gallus gallus]	29.481	40.2	11	17	11	0.995	1.058	0.956	0.971	0.97	1.029	1.047	0.0662614	0.17886
420063	NP_001012569.1	ras-related protein Rab-11B [Gallus gallus]	24.521	59.2	12	19	3	1.015	0.957	1.064	0.937	1.093	0.977	0.905	-0.14401	0.01598
420586	NP_001012576.1	transmembrane protein 106B [Gallus gallus]	30.949	9.1	2	2	2	1.024	0.928	1.072	0.979	1.046	0.965	0.914	-0.129734	0.0123173
420741	NP_001012577.1	septin-7 [Gallus gallus]	48.645	51.6	21	48	1
420917	NP_001012580.1	progressive ankylosis protein homolog [Gallus gallus]	54.537	6.5	3	3	3	1.234	0.72	1.308	0.691	1.311	0.769	0.566	-0.821126	0.000101273
420930	NP_001012581.1	T-complex protein 1 subunit epsilon [Gallus gallus]	59.714	57.7	29	72	29	0.968	1.026	0.947	1.028	0.971	1.019	1.065	0.0908534	0.00164213
421327	NP_001012583.1	sphingolipid delta(4)-desaturase DES1 [Gallus gallus]	37.975	14.9	3	4	3	0.919	1.141	1.053	1.004	0.956	0.94	1.054	0.0758749	0.50846
421453	NP_001012584.1	protein YIPF3 [Gallus gallus]	36.942	6	2	2	2	1.008	1.028	0.958	1.042	0.963	1.011	1.052	0.0731347	0.050625
421462	NP_001012585.1	tetratricopeptide repeat protein 27 [Gallus gallus]	96.306	2.7	2	2	2	1.058	1.044	0.944	1.01	1.003	0.956	1.002	0.00288251	0.96252
421595	NP_001012586.1	cleavage stimulation factor subunit 3 [Gallus gallus]	83.071	9.3	6	8	6	0.877	1.01	1.035	1.099	0.996	0.995	1.067	0.0935602	0.3202
422145	NP_001012589.1	integral membrane protein 2A [Gallus gallus]	28.299	27.5	6	7	6	1.08	0.885	1.201	0.916	1.128	0.836	0.774	-0.369595	0.0032559
422232	NP_001012590.2	ras-related protein Rap-2c [Gallus gallus]	20.725	20.8	3	5	1
422277	NP_001012592.1	SH3 domain-binding glutamic acid-rich-like protein [Gallus gallus]	12.795	78.9	8	18	8	0.974	0.888	1.023	0.919	1.152	1.029	0.901	-0.150401	0.19394
422496	NP_001012594.1	heat shock 70 kDa protein 4L [Gallus gallus]	94.811	49.6	39	65	35	0.981	1.034	0.978	1.022	1.002	1.021	1.039	0.0551957	0.0112179
422787	NP_001012598.1	sister chromatid cohesion protein PDS5 homolog A [Gallus gallus]	153.08	15.5	20	27	17	1.005	1.022	0.993	0.949	0.975	0.992	0.997	-0.00433459	0.87962
422792	NP_001012599.1	UDP-glucose 6-dehydrogenase [Gallus gallus]	55.064	57.3	25	98	25	0.883	1.136	0.81	1.176	0.833	1.133	1.364	0.447844	0.00038019
422795	NP_001012600.1	RELT-like protein 1 precursor [Gallus gallus]	31.157	9.7	3	3	3	0.976	1.011	0.992	1.013	0.989	1.027	1.032	0.045443	0.0111841
423421	NP_001012606.1	inositol-tetrakisphosphate 1-kinase [Gallus gallus]	45.315	2.5	1	1	1
423549	NP_001012607.1	exocyst complex component 5 [Gallus gallus]	81.727	18.4	12	14	12	0.989	1.002	1.012	0.969	1.04	0.995	0.975	-0.0365259	0.23396
424156	NP_001012612.1	Golgi reassembly-stacking protein 2 [Gallus gallus]	46.409	22	11	17	11	0.984	1.015	1.072	0.972	0.994	0.946	0.962	-0.0558912	0.31648
424396	NP_001012613.3	protein-associating with the carboxyl-terminal domain of ezrin [Gallus gallus]	82.55	1.5	1	2	1	0.884	0.901	1.17	1.051	1.022	0.983	0.954	-0.0679388	0.67034
424487	NP_001012615.1	ATP-binding cassette sub-family D member 3 [Gallus gallus]	75.534	10.2	8	9	8	0.958	1.017	0.993	1.046	0.962	1.017	1.057	0.0799754	0.0192021
424926	NP_001012618.2	26S proteasome non-ATPase regulatory subunit 1 [Gallus gallus]	106.05	46.8	35	67	35	0.964	1.031	0.97	1.031	0.988	0.995	1.046	0.0648829	0.031998
424993	NP_001012620.1	translocation protein SEC62 [Gallus gallus]	45.965	14.1	6	17	6	0.996	1	1.01	0.992	0.977	1.001	1.003	0.00432161	0.74986
426024	NP_001012622.1	E3 ubiquitin-protein transferase MAEA [Gallus gallus]	45.388	14.4	5	6	5	0.928	0.937	1.039	1.027	0.969	1.099	1.043	0.0607392	0.50686
426074	NP_001012623.1	PRA1 family protein 3 [Gallus gallus]	21.651	27.1	5	10	5	1.027	0.956	1.092	0.934	1	0.896	0.893	-0.163268	0.025039
426152	NP_001012624.1	U3 small nucleolar RNA-associated protein 15 homolog [Gallus gallus]	58.392	11	6	6	6	0.99	1.083	0.968	1.023	0.904	0.994	1.083	0.115033	0.097784
426797	NP_001012625.1	sorting nexin-2 [Gallus gallus]	58.417	30.9	16	21	14	0.974	0.996	0.984	1.003	1.03	1.014	1.008	0.0114956	0.65698
417157	NP_001012671.1	surfeit locus protein 1 [Gallus gallus]	35.21	12.6	3	4	3	0.971	0.997	1.075	0.951	1.059	0.961	0.937	-0.093879	0.137821
422312	NP_001012717.1	myotubularin-related protein 8 [Gallus gallus]	71.967	2.1	1	1	1	0.952	0.967	1.057	0.875	0.965	1.173	1.014	0.0200577	0.94072
503574	NP_001012719.1	U5 small nuclear ribonucleoprotein 200 kDa helicase [Gallus gallus]	69.565	25.2	13	21	13	0.966	0.994	1.008	1.082	0.927	1.022	1.068	0.0949116	0.131918
415450	NP_001012787.1	signal peptide peptidase-like 2A precursor [Gallus gallus]	56.845	5.2	3	5	3	0.964	0.936	1.193	0.975	1.025	0.921	0.89	-0.168123	0.16066
415681	NP_001012793.1	conserved oligomeric Golgi complex subunit 4 [Gallus gallus]	87.588	13.2	8	9	8	1.009	0.96	1.012	1.053	0.989	1.011	1.005	0.0071955	0.8928
415688	NP_001012794.1	GATOR complex protein WDR59 [Gallus gallus]	109.88	1.4	1	1	1
415694	NP_001012795.2	Bardet-Biedl syndrome 2 protein [Gallus gallus]	79.255	4.7	3	4	3
416057	NP_001012800.1	glutaminyl-tRNA synthetase [Gallus gallus]	87.844	52.7	36	50	36	1.024	0.979	0.974	0.994	1.017	1.004	0.987	-0.018878	0.51014
416524	NP_001012806.1	epsin-2 [Gallus gallus]	52.57	22.4	10	14	10	0.954	1.05	0.982	1.053	0.936	1.041	1.095	0.130931	0.0032215
417119	NP_001012814.1	ras-related protein Rab-14 [Gallus gallus]	23.897	57.7	9	16	9	1.04	0.952	1.042	0.976	1.008	0.993	0.945	-0.0816138	0.025941
417125	NP_001012815.1	26S proteasome non-ATPase regulatory subunit 5 [Gallus gallus]	55.727	32.1	13	16	13	0.958	0.943	1.01	0.999	1.067	1.014	0.974	-0.0380063	0.53486
417182	NP_001012816.2	exosome complex component RRP4 [Gallus gallus]	32.437	27.9	7	9	7	0.952	1.069	1.026	1.007	0.95	0.997	1.05	0.0703893	0.21992
417552	NP_001012823.1	nuclear cap-binding protein subunit 3 [Gallus gallus]	68.725	5.5	3	3	3	1.063	0.956	1.054	1.098	0.925	0.919	0.977	-0.0335695	0.75084
417622	NP_001012824.1	vacuolar protein sorting-associated protein 53 homolog [Gallus gallus]	93.704	8.9	5	5	5	1.117	0.897	0.933	1.042	1.04	0.963	0.939	-0.0908029	0.41338
417851	NP_001012826.1	CCR4-NOT transcription complex subunit 2 [Gallus gallus]	57.374	6.5	3	3	3	0.929	1.24	1.187	0.954	0.814	0.881	1.049	0.0690147	0.75858
417857	NP_001012827.1	TBC1 domain family member 15 [Gallus gallus]	76.894	24.4	15	18	15	0.994	0.882	1.01	0.984	1.04	1.01	0.945	-0.0816138	0.25194
417898	NP_001012828.1	ubiquitin-conjugating enzyme E2 N [Gallus gallus]	17.066	44.7	8	20	8	1.002	0.881	0.982	0.963	1.098	1.059	0.942	-0.086201	0.38632
418299	NP_001012836.1	peroxisomal targeting signal 1 receptor [Gallus gallus]	71.79	5.4	3	3	3
418736	NP_001012843.1	ras GTPase-activating protein 3 [Gallus gallus]	96.338	2	1	1	1
419213	NP_001012849.1	double-stranded RNA-binding protein Staufen homolog 1 [Gallus gallus]	78.049	28.4	21	35	18	0.968	1.029	0.956	1.027	0.979	1.02	1.06	0.0840643	0.00141596
419418	NP_001012854.1	integrator complex subunit 11 [Gallus gallus]	68.187	6.2	4	5	4	1.015	0.978	0.977	1.076	0.914	1.045	1.066	0.0922074	0.196859
419464	NP_001012855.1	adaptin ear-binding coat-associated protein 2 [Gallus gallus]	28.854	17.3	3	3	3	0.896	0.952	1.158	0.914	1.031	1.051	0.946	-0.0800879	0.57176
419470	NP_001012856.1	ER membrane protein complex subunit 1 precursor [Gallus gallus]	109.91	26.4	22	29	22	0.944	1.048	0.972	1.067	0.923	1.081	1.126	0.171207	0.002458
419656	NP_001012859.2	importin subunit alpha-7 [Gallus gallus]	60.06	24.6	9	10	3	0.955	0.893	1.092	0.998	1.007	1.058	0.966	-0.0499049	0.60018
420188	NP_001012866.1	transmembrane protein 70, mitochondrial precursor [Gallus gallus]	27.432	13.4	2	2	2	1.07	1.009	0.98	1.053	0.92	0.978	1.024	0.0342157	0.63824
420560	NP_001012872.1	syndetin [Gallus gallus]	109.55	1.3	1	1	1
420583	NP_001012874.2	PHD finger protein 14 [Gallus gallus]	101.98	3.1	2	2	2
420757	NP_001012876.1	integrin alpha-9 precursor [Gallus gallus]	114.91	6.2	6	8	6	0.982	1.014	0.974	1.042	0.974	1.06	1.063	0.0881416	0.0096615
420772	NP_001012878.2	proteasome subunit alpha type-2 [Gallus gallus]	25.919	49.6	9	13	9	1.019	1.043	0.999	0.984	0.963	0.982	1.009	0.0129262	0.73842
421175	NP_001012886.1	ADP-ribosylation factor-like protein 8A [Gallus gallus]	21.444	33.9	7	12	6	1.022	0.97	1.009	0.996	1.089	0.981	0.945	-0.0816138	0.084823
421485	NP_001012893.1	saccharopine dehydrogenase-like oxidoreductase [Gallus gallus]	46.854	40.3	13	21	13	0.957	1.068	1.035	1.033	0.937	1.001	1.059	0.0827026	0.178583
421717	NP_001012896.1	nuclear receptor coactivator 7 [Gallus gallus]	102.06	0.8	1	1	1	1.028	0.784	1.141	0.917	1.086	1.049	0.845	-0.242977	0.122237
421861	NP_001012897.1	cell cycle control protein 50A [Gallus gallus]	41.448	23.1	9	12	9	1.01	1.004	1.069	0.954	0.964	0.95	0.956	-0.0649175	0.26712
422344	NP_001012904.1	transmembrane protein 164 [Gallus gallus]	36.486	3.4	1	1	1
422370	NP_001012905.2	NF-kappa-B-repressing factor [Gallus gallus]	86.335	12	8	10	8	1.068	1.074	1.031	0.993	0.968	0.989	0.996	-0.00578235	0.93344
422904	NP_001012908.1	C-terminal-binding protein 1 [Gallus gallus]	46.815	21.6	9	14	1	0.913	1.062	0.944	1.108	0.91	1.067	1.17	0.226509	0.00091922
422932	NP_001012910.1	succinate--CoA ligase [ADP/GDP-forming] subunit alpha, mitochondrial [Gallus gallus]	34.849	27.2	7	14	7	1.025	1.028	1.071	0.984	0.983	0.998	0.978	-0.0320936	0.47052
422936	NP_001012911.1	mitochondrial antiviral-signaling protein [Gallus gallus]	67.747	6.2	4	5	4	1.031	1.007	0.987	1.075	0.874	1.03	1.076	0.105678	0.2282
422951	NP_001012912.1	SET and MYND domain-containing protein 5 [Gallus gallus]	46.967	7.1	4	5	4	0.965	0.991	1.023	0.996	1.006	1.06	1.018	0.0257376	0.56508
423043	NP_001012913.2	myotubularin-related protein 13 [Gallus gallus]	207.83	4.1	6	8	5
423102	NP_001012914.1	AP-2 complex subunit alpha-2 [Gallus gallus]	104.19	40.5	34	63	1	1.069	1.058	0.974	0.984	0.951	0.974	1.007	0.0100637	0.86636
423541	NP_001012920.1	AT-rich interactive domain-containing protein 4A [Gallus gallus]	141.79	1.4	1	1	1
423637	NP_001012921.2	annexin A11 [Gallus gallus]	52.687	37.8	18	29	18	1.131	0.854	1.123	0.868	1.172	0.887	0.762	-0.392137	9.6259e-05
423815	NP_001012924.1	E3 ubiquitin-protein ligase MARCH5 [Gallus gallus]	31.422	4.6	1	2	1
423845	NP_001012926.1	RRP12-like protein [Gallus gallus]	144.05	11	12	16	12	0.945	0.993	0.99	1.027	0.986	1.05	1.051	0.0717627	0.086876
423933	NP_001012930.1	mini-chromosome maintenance complex-binding protein [Gallus gallus]	71.862	11	6	7	6	0.985	1.002	1.007	0.995	1.031	0.975	0.983	-0.0247367	0.3371
424059	NP_001012934.1	60 kDa heat shock protein, mitochondrial precursor [Gallus gallus]	60.972	49.4	27	85	27	0.944	1.041	0.989	1.046	0.93	1.012	1.082	0.1137	0.0199818
424200	NP_001012937.1	aspartyl aminopeptidase [Gallus gallus]	51.86	29.2	11	17	11	1.059	1.008	1.019	0.985	0.983	0.959	0.964	-0.0528949	0.23652
424317	NP_001012940.1	signal transducing adapter molecule 2 [Gallus gallus]	52.406	11.1	4	5	4
424521	NP_001012944.2	selenoprotein F precursor [Gallus gallus]	17.769	18.1	2	5	2	0.986	1.265	0.854	0.982	0.985	0.882	1.108	0.147958	0.4724
424973	NP_001012949.1	mitofusin-1 [Gallus gallus]	84.019	5.3	4	4	4	0.896	1.064	1.032	1.074	0.971	0.975	1.074	0.102994	0.23276
425294	NP_001012952.1	26S proteasome non-ATPase regulatory subunit 2 [Gallus gallus]	99.997	42.8	34	59	34	0.952	1.033	0.962	1.048	0.97	1.039	1.082	0.1137	0.00032401
426469	NP_001012957.1	serine/threonine-protein phosphatase 6 regulatory ankyrin repeat subunit C [Gallus gallus]	115.86	1.7	1	1	1
426925	NP_001012960.1	exportin-7 [Gallus gallus]	123.87	21.3	21	25	21	1.035	0.972	1.02	0.975	1.039	0.985	0.948	-0.077041	0.00146452
427137	NP_001012962.1	exosome RNA helicase MTR4 [Gallus gallus]	116.05	25.3	24	27	1
427376	NP_001012963.1	dnaJ homolog subfamily A member 1 [Gallus gallus]	44.706	4.5	2	2	2
428081	NP_001012965.1	exportin-4 [Gallus gallus]	130.32	8.9	9	11	9	0.931	1.125	0.964	1.024	0.905	1.072	1.15	0.201634	0.0129776
428359	NP_001012966.1	deubiquitinating protein VCIP135 [Gallus gallus]	134.34	1.4	2	2	2	0.979	1.024	1.07	0.885	1.107	0.951	0.906	-0.142417	0.151023
428427	NP_001012967.1	calcium-binding mitochondrial carrier protein Aralar2 [Gallus gallus]	74.102	22.8	14	18	14	1.032	1.066	1.05	1.001	1.003	0.987	0.99	-0.0144996	0.71926
429021	NP_001012970.1	N-chimaerin [Gallus gallus]	53.169	9.8	3	4	3	0.697	0.541	1.398	1.257	1.072	1.043	0.897	-0.15682	0.71272
429060	NP_001012971.1	metastasis-associated protein MTA1 [Gallus gallus]	71.172	15.6	9	10	6	1.139	1.129	1.06	0.826	0.903	0.948	0.936	-0.0954196	0.5715
417185	NP_001013413.1	argininosuccinate synthase [Gallus gallus]	46.903	6.2	3	3	3
548626	NP_001017413.1	pentraxin-related protein PTX3 precursor [Gallus gallus]	47.384	30	11	22	11	0.589	1.383	0.571	1.589	0.527	1.356	2.566	1.35952	9.7999e-05
548628	NP_001017414.1	NAD-dependent protein deacetylase sirtuin-2 [Gallus gallus]	44.737	14.6	4	7	4	0.946	1.032	0.925	1.06	1.012	1.064	1.095	0.130931	0.033599
419972	NP_001019627.1	vesicle-fusing ATPase [Gallus gallus]	82.176	33.1	22	35	21	0.984	1.011	0.995	0.969	1.014	0.987	0.991	-0.013043	0.59116
417247	NP_001019749.1	tumor necrosis factor ligand superfamily member 15 [Gallus gallus]	26.315	10.9	2	2	2	1.173	0.86	1.176	0.624	1.346	0.85	0.632	-0.662004	0.0149848
415522	NP_001019905.1	selenoprotein S [Gallus gallus]	21.163	24.7	3	4	3	0.972	1.018	0.992	1.033	1.003	0.993	1.026	0.0370307	0.157898
415841	NP_001020611.1	charged multivesicular body protein 1a [Gallus gallus]	21.733	9.2	2	2	2	0.997	0.969	0.984	1.023	1.04	0.999	0.99	-0.0144996	0.68666
415995	NP_001020612.1	selenoprotein K [Gallus gallus]	10.522	14.7	1	1	1	1.08	1.094	1.068	0.952	0.958	0.865	0.937	-0.093879	0.43298
395869	NP_001025020.1	rho-related GTP-binding protein RhoC precursor [Gallus gallus]	21.973	38.9	8	16	1	1.118	1.006	1.05	0.888	1.073	0.886	0.858	-0.22095	0.027797
419062	NP_001025224.1	39S ribosomal protein L48, mitochondrial [Gallus gallus]	23.874	12.9	3	3	3	1.032	0.985	1.004	1.027	1.012	0.955	0.973	-0.0394883	0.29324
374062	NP_001025508.1	frizzled-1 precursor [Gallus gallus]	65.49	8.4	5	6	3	1.045	0.872	1.195	0.867	1.236	0.717	0.707	-0.500218	0.013244
374256	NP_001025510.2	CD81 antigen [Gallus gallus]	26.229	18.6	2	8	2	1.124	0.959	1.01	0.885	1.166	0.929	0.84	-0.251539	0.024359
395342	NP_001025518.1	cytotoxic and regulatory T-cell molecule precursor [Gallus gallus]	48.552	2.7	1	1	1	1.223	1.127	1.07	0.865	0.88	0.849	0.895	-0.16004	0.45206
415319	NP_001025558.1	E3 ubiquitin-protein ligase ARIH1 [Gallus gallus]	41.398	20.1	6	7	6	1.087	0.975	0.968	0.966	1.056	0.991	0.942	-0.086201	0.178259
415320	NP_001025561.1	beta-hexosaminidase subunit alpha precursor [Gallus gallus]	58.948	23.6	11	16	11	1.042	0.978	1.069	0.902	1.059	0.925	0.885	-0.176251	0.0080153
373916	NP_001025707.1	cytoplasmic aconitate hydratase [Gallus gallus]	98.073	15.5	11	12	11	0.907	1.029	0.943	1.014	1.024	1.061	1.08	0.111031	0.110224
415355	NP_001025716.1	F-box only protein 22 [Gallus gallus]	43.256	13.5	4	6	4	1.057	0.965	1.012	1	1.013	0.996	0.961	-0.0573917	0.093504
415373	NP_001025717.1	serine beta-lactamase-like protein LACTB, mitochondrial [Gallus gallus]	58.004	5.4	2	2	2
415391	NP_001025718.1	adenosine deaminase-like protein [Gallus gallus]	32.339	2.8	1	1	1	0.969	0.936	1.107	0.909	1.139	0.956	0.871	-0.199255	0.059276
415475	NP_001025722.2	LRP chaperone MESD precursor [Gallus gallus]	24.563	46.6	8	12	8	0.96	1.107	0.972	0.993	0.963	1.006	1.073	0.10165	0.182542
415596	NP_001025728.1	N-acetylgalactosamine kinase [Gallus gallus]	50.21	17	6	9	6	1.056	0.894	1.042	0.91	1.076	1.006	0.885	-0.176251	0.031462
415678	NP_001025735.1	protein VAC14 homolog [Gallus gallus]	87.822	13.2	10	12	10	0.881	0.975	1.084	0.98	0.922	1.057	1.043	0.0607392	0.53888
415716	NP_001025739.2	lysophosphatidylcholine acyltransferase 2 [Gallus gallus]	61.016	39.5	17	22	16	0.97	1.01	0.98	1.014	0.925	1.05	1.069	0.0962619	0.036278
415734	NP_001025740.1	HEAT repeat-containing protein 3 [Gallus gallus]	74.066	5	3	3	3	0.87	0.984	1.01	1.018	0.968	1.145	1.105	0.144046	0.193659
415793	NP_001025744.1	cytoplasmic dynein 1 light intermediate chain 2 [Gallus gallus]	53.902	40	17	24	17	0.918	1.037	0.992	1.053	0.975	1.01	1.075	0.104337	0.052381
415831	NP_001025749.1	kelch domain-containing protein 4 [Gallus gallus]	65.064	10.7	6	6	6	0.964	0.893	0.917	1.028	1.045	1.028	1.008	0.0114956	0.9119
415832	NP_001025750.2	large neutral amino acids transporter small subunit 1 [Gallus gallus]	56.772	4.6	2	2	2	0.957	1.071	0.813	1.06	1.005	1.1	1.164	0.219091	0.074395
415865	NP_001025752.1	cytochrome b5 type B [Gallus gallus]	16.157	34.7	4	6	4	1.031	0.963	0.958	1.02	0.997	1.039	1.012	0.0172093	0.72202
415885	NP_001025754.1	lysine--tRNA ligase [Gallus gallus]	67.917	48	28	58	28	1.008	1.017	0.98	0.981	1.038	1.011	0.994	-0.00868224	0.79758
415926	NP_001025756.1	acylamino-acid-releasing enzyme [Gallus gallus]	81.234	20.3	12	15	12	1.022	0.99	1.015	1.026	0.988	0.999	0.997	-0.00433459	0.83442
415931	NP_001025759.2	RNA-binding protein 6 [Gallus gallus]	135.78	4.9	6	9	6	0.926	1.075	0.995	0.965	0.994	1.049	1.06	0.0840643	0.22806
415940	NP_001025760.1	twinfilin-2 [Gallus gallus]	39.835	24.1	10	13	7	0.993	1.04	0.952	1.017	1.031	1.02	1.034	0.0482362	0.23232
415944	NP_001025761.1	ubiquitin carboxyl-terminal hydrolase BAP1 [Gallus gallus]	77.703	2.3	2	2	2
416014	NP_001025768.1	coatomer subunit gamma-1 [Gallus gallus]	97.601	38.8	28	56	24	1.019	0.968	1.005	0.991	1.051	1.022	0.969	-0.0454314	0.20444
416026	NP_001025769.1	ankyrin repeat and BTB/POZ domain-containing protein 1 [Gallus gallus]	54.784	4.8	2	2	2	0.959	1.119	1	0.964	0.885	1.07	1.109	0.149259	0.145957
416058	NP_001025772.1	inosine-5'-monophosphate dehydrogenase 2 [Gallus gallus]	55.558	42.8	18	27	18	0.987	1.049	0.953	1.037	0.944	1.046	1.086	0.119024	0.0040981
416168	NP_001025778.1	arginine--tRNA ligase, cytoplasmic [Gallus gallus]	75.417	47.4	34	54	34	0.994	1	0.986	0.976	1.009	1.016	1.001	0.00144197	0.94932
416226	NP_001025780.2	clathrin light chain B isoform 2 [Gallus gallus]	23.121	34.8	11	20	9	0.921	1.051	0.982	1.073	0.99	1.014	1.085	0.117695	0.044481
416232	NP_001025782.2	THO complex subunit 3 [Gallus gallus]	36.203	5.3	2	3	2
416240	NP_001025786.1	clathrin interactor 1 [Gallus gallus]	71.097	16.6	10	13	10	1.042	1.065	0.969	1.014	0.967	1.088	1.063	0.0881416	0.127976
416242	NP_001025787.1	probable tRNA(His) guanylyltransferase [Gallus gallus]	32.012	17.5	4	4	4	0.962	1.015	1.093	1.036	0.981	0.927	0.981	-0.027675	0.73712
416314	NP_001025792.1	GTP-binding protein SAR1b [Gallus gallus]	22.048	57.7	8	15	5	1.013	0.886	1.036	1.079	0.96	1.06	1.005	0.0071955	0.9783
416354	NP_001025795.1	C-terminal binding protein-like [Gallus gallus]	47.985	21.1	9	14	3	0.898	0.954	0.908	1.072	1.071	1.105	1.088	0.121679	0.30136
416406	NP_001025799.1	GATOR complex protein WDR24 [Gallus gallus]	80.209	3.3	2	2	2	0.963	1.008	1.052	1.024	0.95	1.01	1.026	0.0370307	0.49676
416490	NP_001025803.1	actin-related protein 2/3 complex subunit 1B [Gallus gallus]	41.068	39.6	14	41	14	1.057	0.968	1.003	0.99	1.043	0.972	0.944	-0.0831412	0.029198
416497	NP_001025804.1	protein NATD1 [Gallus gallus]	12.758	12.7	1	1	1
416513	NP_001025805.1	developmentally-regulated GTP-binding protein 2 [Gallus gallus]	40.705	34.1	12	15	12	1.028	0.932	1.023	0.968	1.032	0.979	0.934	-0.0985055	0.010418
416515	NP_001025806.1	protein flightless-1 homolog [Gallus gallus]	144.86	23.4	27	35	27	1.026	0.971	1.016	1.014	0.982	0.98	0.98	-0.0291463	0.35176
416559	NP_001025809.1	glycerol-3-phosphate phosphatase [Gallus gallus]	32.995	18.3	6	7	6	0.992	0.9	0.925	0.987	1.14	1.068	0.967	-0.0484122	0.70082
416656	NP_001025815.1	H(+)/Cl(-) exchange transporter 7 [Gallus gallus]	88.595	5.2	3	3	3	0.819	0.809	1.598	1.007	0.906	0.868	0.808	-0.307573	0.47316
416672	NP_001025816.1	nmrA-like family domain-containing protein 1 [Gallus gallus]	32.689	42.2	12	16	12	1.128	0.846	1.03	0.851	1.237	0.904	0.766	-0.384584	0.0097599
416678	NP_001025818.1	ubiquitin-conjugating enzyme E2 H [Gallus gallus]	20.655	23	4	6	4	1.053	0.962	1.044	0.916	1.075	0.953	0.892	-0.164884	0.0027818
416704	NP_001025820.1	eukaryotic initiation factor 4A-III [Gallus gallus]	46.815	32	17	34	13	0.999	0.968	1.004	1.014	1.011	1.021	0.996	-0.00578235	0.82974
416766	NP_001025823.1	synaptosomal-associated protein 29 [Gallus gallus]	28.133	21.8	6	6	6	1.054	0.983	1.017	1.026	1.008	0.929	0.954	-0.0679388	0.20978
416778	NP_001025825.2	septin-5 [Gallus gallus]	42.952	47.7	20	31	15	1.096	0.994	1.03	0.923	1.055	0.92	0.892	-0.164884	0.020943
416798	NP_001025826.1	nucleolar complex protein 4 homolog [Gallus gallus]	58.291	10.8	4	4	4	0.988	0.972	1.016	0.914	1.116	1.008	0.928	-0.107803	0.184662
416862	NP_001025833.2	zinc finger CCHC domain-containing protein 8 [Gallus gallus]	79.444	6.9	3	3	3	1.108	0.906	1.124	0.931	1.06	0.89	0.828	-0.272297	0.00102065
416909	NP_001025836.1	tuftelin-interacting protein 11 [Gallus gallus]	95.573	7.1	5	6	5	0.978	1.094	0.929	1.048	1.006	0.962	1.066	0.0922074	0.2312
416937	NP_001025838.1	D-dopachrome decarboxylase [Gallus gallus]	12.835	33.1	4	5	4	1.115	0.955	0.954	1.012	1.055	0.971	0.94	-0.0892673	0.28886
416983	NP_001025840.1	ras-related protein Rab-35 [Gallus gallus]	23.125	21.9	6	8	6	1.05	0.955	1.078	0.908	0.992	0.971	0.908	-0.139236	0.039121
417128	NP_001025852.1	nucleus accumbens-associated protein 2 [Gallus gallus]	62.793	2.8	1	1	1
417160	NP_001025853.1	surfeit locus protein 6 [Gallus gallus]	41.588	5.9	2	2	2
417190	NP_001025858.1	torsin-1A precursor [Gallus gallus]	39.208	12.5	4	4	4	0.865	1.171	1.245	1.007	0.697	1.006	1.134	0.181421	0.43648
417198	NP_001025861.1	nucleoporin NUP188 homolog [Gallus gallus]	194.83	5.5	9	12	9	1.008	1.028	0.978	1.029	0.959	1.053	1.056	0.0786098	0.029482
417210	NP_001025862.2	protein SET [Gallus gallus]	32.103	14.1	4	6	4	1.08	1.019	0.973	0.918	1.029	0.987	0.949	-0.07552	0.28934
417321	NP_001025869.1	syntaxin-8 [Gallus gallus]	26.83	26.3	4	4	4	0.96	1.09	1.025	0.918	1.026	0.99	0.996	-0.00578235	0.91298
417324	NP_001025870.1	Golgi apparatus membrane protein TVP23 homolog B [Gallus gallus]	23.54	5.8	1	1	1
417355	NP_001025874.1	bifunctional arginine demethylase and lysyl-hydroxylase JMJD6 [Gallus gallus]	47.759	15.5	5	7	5	0.946	0.981	1.059	1.022	1.008	0.991	0.994	-0.00868224	0.88424
417425	NP_001025877.1	26S proteasome non-ATPase regulatory subunit 12 [Gallus gallus]	52.878	44.7	19	33	19	0.951	0.985	0.954	1.02	0.969	1.063	1.068	0.0949116	0.04648
417539	NP_001025884.1	protein NipSnap homolog 2 [Gallus gallus]	33.156	28.5	8	10	8	1.012	1.057	1.085	0.922	0.951	0.978	0.97	-0.0439433	0.609
417545	NP_001025885.1	argininosuccinate lyase [Gallus gallus]	51.043	17	6	6	6	0.84	1.052	0.897	1.123	0.962	1.127	1.223	0.290424	0.0108768
417564	NP_001025887.2	2-(3-amino-3-carboxypropyl)histidine synthase subunit 1 [Gallus gallus]	46.479	2.4	1	1	1
417653	NP_001025895.1	protein AATF [Gallus gallus]	65.046	13.6	6	6	6	1.103	1.001	1.05	1.035	0.864	0.954	0.991	-0.013043	0.96062
417707	NP_001025899.1	nicotinamide phosphoribosyltransferase [Gallus gallus]	55.586	26.2	13	16	13	0.953	1.004	0.858	1.13	0.93	1.119	1.187	0.24732	0.025881
417862	NP_001025914.2	glioma pathogenesis-related protein 1 precursor [Gallus gallus]	30.169	17.4	3	3	3	1.119	0.937	1.183	0.872	0.966	0.932	0.839	-0.253257	0.055823
417867	NP_001025916.1	palmitoyltransferase ZDHHC17 [Gallus gallus]	71.529	2.9	2	2	1
417892	NP_001025918.1	decorin precursor [Gallus gallus]	39.686	55.2	16	53	16	0.822	1.093	0.897	1.229	0.808	1.15	1.374	0.458382	0.0024805
417919	NP_001025920.1	ETS domain-containing protein Elk-3 [Gallus gallus]	44.473	2.2	1	1	1
417930	NP_001025922.1	SCY1-like protein 2 [Gallus gallus]	83.702	4.5	3	3	3	1.071	1.048	1.01	0.985	0.996	0.908	0.956	-0.0649175	0.38012
417939	NP_001025923.1	WD repeat-containing protein 91 [Gallus gallus]	83.418	14.9	10	10	10	1.007	0.995	1.078	0.954	1.053	0.932	0.918	-0.123434	0.03668
417961	NP_001025925.1	heme-binding protein 1 [Gallus gallus]	21.105	23.8	3	3	3	1.047	0.849	1.069	0.887	1.17	0.994	0.831	-0.26708	0.032558
418003	NP_001025928.1	hsc70-interacting protein [Gallus gallus]	40.158	27.4	9	17	9	0.98	1.043	0.95	1.061	0.96	1.016	1.08	0.111031	0.0079582
418066	NP_001025932.2	periodic tryptophan protein 1 homolog [Gallus gallus]	55.703	6.7	3	3	3
418082	NP_001025933.2	thioredoxin reductase 1, cytoplasmic isoform 1 [Gallus gallus]	55.051	25.7	11	13	11	1.031	0.88	1.038	0.967	1.104	0.976	0.89	-0.168123	0.041262
418160	NP_001025938.1	adenosine deaminase 2 precursor [Gallus gallus]	53.883	5.2	2	2	2
418250	NP_001025944.1	muskelin [Gallus gallus]	84.542	3.7	2	2	2	0.923	0.929	1.017	1.003	0.996	1.13	1.043	0.0607392	0.57034
418271	NP_001025945.1	importin subunit alpha-5 [Gallus gallus]	60.194	11.9	6	6	1
418283	NP_001025946.1	COP9 signalosome complex subunit 7a [Gallus gallus]	30.404	28.4	7	9	7	0.933	0.967	0.956	1.052	0.946	1.089	1.096	0.132248	0.065205
418294	NP_001025948.1	complement C1s subcomponent precursor [Gallus gallus]	77.325	6.2	3	3	3	0.634	1.245	0.733	1.246	0.749	1.37	1.825	0.867896	0.0005978
418319	NP_001025949.1	N-alpha-acetyltransferase 50 [Gallus gallus]	17.787	48.4	8	14	8	0.981	1.041	0.981	1.024	0.987	1.033	1.051	0.0717627	0.00067901
418329	NP_001025951.2	rab-like protein 3 [Gallus gallus]	26.303	28	6	8	6	0.981	0.959	1.027	1.017	1.03	0.997	0.979	-0.0306192	0.40628
418461	NP_001025963.1	charged multivesicular body protein 2b [Gallus gallus]	24.059	8.9	2	2	2
418469	NP_001025964.2	heat shock 70 kDa protein 13 precursor [Gallus gallus]	52.117	20.1	9	9	9	0.956	1.182	0.884	1.1	0.856	1.104	1.256	0.328836	0.0047771
418552	NP_001025969.1	ES1 protein homolog, mitochondrial [Gallus gallus]	27.371	37.8	8	12	7	1.03	0.962	1.028	1.008	1.003	0.983	0.965	-0.0513992	0.087141
418567	NP_001025971.1	ATP-dependent RNA helicase DDX3X [Gallus gallus]	72.048	46.1	27	71	26	0.935	1.065	0.934	1.063	0.937	1.048	1.132	0.178874	1.89823e-05
418573	NP_001025972.2	renin receptor precursor [Gallus gallus]	39.438	8.5	2	4	2	0.935	0.867	1.091	0.927	1.266	0.939	0.83	-0.268817	0.12024
418602	NP_001025974.1	spermine synthase [Gallus gallus]	41.897	3	1	1	1
418606	NP_001025975.1	eukaryotic translation initiation factor 1A, X-chromosomal [Gallus gallus]	16.442	34	6	12	6	0.995	1.056	0.944	0.992	0.986	1.039	1.055	0.077243	0.095699
418709	NP_001025983.1	phosducin-like protein 3 [Gallus gallus]	27.776	25	6	9	6	1.01	0.989	0.952	0.965	1.084	1.014	0.974	-0.0380063	0.57132
418727	NP_001025985.1	cytoplasmic protein NCK2 [Gallus gallus]	43.059	18.4	6	10	6	1.013	1.02	0.992	0.954	1.05	0.98	0.967	-0.0484122	0.2574
418791	NP_001025990.1	multidrug resistance-associated protein 4 [Gallus gallus]	150.05	12.1	15	18	15	0.726	1.214	0.754	1.324	0.727	1.239	1.711	0.77484	4.4964e-05
418874	NP_001025997.1	ribonuclease H2 subunit B [Gallus gallus]	29.07	3.5	1	2	1
418953	NP_001026001.2	lambda-crystallin homolog [Gallus gallus]	34.945	17.1	4	4	4	1.001	0.893	0.998	0.963	1.077	1.03	0.938	-0.0923402	0.24954
419009	NP_001026003.1	cysteine and histidine-rich domain-containing protein 1 [Gallus gallus]	37.37	11.2	3	4	3	1.144	0.692	0.638	1.007	1.906	0.701	0.651	-0.619271	0.3619
419049	NP_001026004.1	40S ribosomal protein S11 [Gallus gallus]	18.346	54.4	11	21	11	0.943	1.014	0.947	1.039	0.951	1.043	1.09	0.124328	0.00072038
419061	NP_001026006.1	proteasomal ATPase-associated factor 1 [Gallus gallus]	42.373	16.8	6	7	6	0.963	1.013	0.958	1.038	1.024	1.046	1.052	0.0731347	0.096943
419069	NP_001026007.1	40S ribosomal protein S3 [Gallus gallus]	26.864	56.6	14	34	14	0.977	1.019	0.988	1.01	0.998	1.026	1.031	0.0440443	0.0160976
419081	NP_001026008.1	ribonucleoside-diphosphate reductase large subunit [Gallus gallus]	90.092	11.8	9	9	9	0.876	1.108	0.896	1.059	0.951	1.097	1.199	0.261832	0.0029418
419082	NP_001026009.1	stromal interaction molecule 1 [Gallus gallus]	69.17	14.4	7	12	7	0.994	0.971	1.053	0.974	1.023	0.964	0.948	-0.077041	0.033956
419116	NP_001026014.1	splicing factor, arginine/serine-rich 6 [Gallus gallus]	40.171	32.2	14	21	9	0.972	1.006	0.989	1.012	0.998	1.034	1.031	0.0440443	0.053075
419118	NP_001026015.1	protein AAR2 homolog [Gallus gallus]	42.686	2.6	1	1	1	0.896	1.034	1.004	1.044	0.987	1.041	1.08	0.111031	0.157802
419125	NP_001026016.1	deoxynucleoside triphosphate triphosphohydrolase SAMHD1 [Gallus gallus]	70.219	5.9	3	3	3
419133	NP_001026018.1	cysteine desulfurase, mitochondrial [Gallus gallus]	49.091	28.8	11	19	11	1.067	1.023	0.947	1.043	0.961	1.024	1.039	0.0551957	0.36028
419140	NP_001026019.1	eukaryotic translation initiation factor 6 [Gallus gallus]	26.526	47.3	7	16	7	1.049	0.994	0.997	1.025	0.969	0.988	0.997	-0.00433459	0.9349
419173	NP_001026023.1	transcription factor MafB [Gallus gallus]	35.467	2.3	1	1	1
419187	NP_001026024.1	serine/threonine-protein kinase 4 [Gallus gallus]	55.336	15.8	6	6	3	0.975	1.151	0.845	1.067	0.935	1.034	1.18	0.238787	0.034861
419257	NP_001026029.1	tumor protein D54 [Gallus gallus]	22.181	63.9	13	21	13	0.984	0.98	0.989	1.032	0.986	1.004	1.019	0.0271541	0.33576
419268	NP_001026030.1	NSFL1 cofactor p47 [Gallus gallus]	40.64	45	14	23	14	0.982	1.039	0.946	1.049	0.932	1.016	1.085	0.117695	0.010764
419288	NP_001026031.1	microtubule-associated protein RP/EB family member 1 [Gallus gallus]	29.143	42.2	13	22	11	0.978	0.994	0.969	1.018	1.018	1.02	1.023	0.0328061	0.26234
419295	NP_001026033.1	regulation of nuclear pre-mRNA domain-containing protein 1B [Gallus gallus]	36.852	34.8	11	12	11	0.999	1.025	0.996	1.01	0.976	0.973	1.012	0.0172093	0.51604
419406	NP_001026042.2	cell division protein kinase 11 [Gallus gallus]	89.925	10	8	8	8	0.931	1.039	1.02	1.08	0.944	0.975	1.069	0.0962619	0.18212
419433	NP_001026047.1	nucleolar complex protein 2 homolog [Gallus gallus]	87.691	11.8	10	14	10	1.035	1.001	0.994	1.014	0.947	0.977	1.005	0.0071955	0.8428
419453	NP_001026049.1	TAR DNA-binding protein 43 [Gallus gallus]	44.589	14	6	10	6	1.006	1.041	0.998	1.015	0.929	0.994	1.04	0.0565835	0.239
419523	NP_001026057.1	serine/threonine-protein phosphatase 2A 55 kDa regulatory subunit B alpha isoform [Gallus gallus]	51.726	36.5	13	19	8	0.977	0.993	0.953	1.021	1.008	1.014	1.031	0.0440443	0.171619
419566	NP_001026063.1	replication protein A 32 kDa subunit [Gallus gallus]	28.863	24.3	4	4	4	0.931	0.906	1.03	1.078	0.994	1.067	1.032	0.045443	0.66454
419585	NP_001026065.1	transcription initiation factor TFIID subunit 12 [Gallus gallus]	17.99	5	1	1	1	1.007	1.08	0.925	1.142	0.853	0.999	1.157	0.210389	0.076656
419605	NP_001026067.1	ras-related GTP-binding protein C [Gallus gallus]	44.899	13.7	6	10	2	0.887	0.993	1.124	0.868	1.272	0.883	0.836	-0.258425	0.20942
419628	NP_001026071.1	protein argonaute-3 [Gallus gallus]	97.27	12.3	9	9	5	0.957	1.156	1.025	0.955	0.927	0.986	1.065	0.0908534	0.4156
419633	NP_001026072.1	neurochondrin [Gallus gallus]	76.399	1.6	1	1	1	1.061	1.074	1.069	0.971	0.864	0.966	1.006	0.00863031	0.91154
419681	NP_001026074.1	palmitoyl-protein thioesterase 1 precursor [Gallus gallus]	33.981	20.9	6	11	6	1	0.98	1.044	0.98	1.003	0.967	0.961	-0.0573917	0.051675
419758	NP_001026081.1	ubiquitin conjugation factor E4 A [Gallus gallus]	123.26	2.6	2	2	2	0.995	1.075	1.067	0.922	1.064	0.896	0.925	-0.112475	0.25886
419765	NP_001026082.2	platelet-activating factor acetylhydrolase IB subunit beta [Gallus gallus]	26.806	10.8	3	5	3	1.043	0.906	1.123	0.934	1.01	0.991	0.891	-0.166503	0.048844
419838	NP_001026086.1	N-fatty-acyl-amino acid synthase/hydrolase PM20D1 precursor [Gallus gallus]	57.161	16.4	9	11	9	1.043	0.996	1.027	0.92	0.976	0.976	0.949	-0.07552	0.169883
419865	NP_001026087.1	methylosome protein 50 [Gallus gallus]	38.516	35.9	9	10	9	1.009	1.024	0.941	1.011	0.981	1.008	1.038	0.0538064	0.143135
419886	NP_001026089.1	cold shock domain-containing protein E1 [Gallus gallus]	88.659	42.4	29	40	29	0.977	1.071	0.906	1.064	0.954	1.061	1.127	0.172488	0.033423
419902	NP_001026090.1	uncharacterized protein C6orf106 homolog [Gallus gallus]	31.976	6.2	1	1	1	0.914	0.947	0.868	1.099	1.012	1.16	1.147	0.197865	0.146417
419912	NP_001026091.1	bcl-2 homologous antagonist/killer [Gallus gallus]	24.991	18.5	3	5	3	0.864	0.918	1.174	1.122	0.829	1.087	1.091	0.125651	0.4916
419939	NP_001026095.1	pleckstrin homology domain-containing family M member 1 [Gallus gallus]	111.28	0.8	1	1	1
419943	NP_001026096.2	pre-rRNA processing protein FTSJ3 [Gallus gallus]	92.63	13	10	13	10	1.052	1.065	1.042	0.968	0.975	0.952	0.973	-0.0394883	0.53884
419959	NP_001026097.1	ATP-dependent RNA helicase DDX42 [Gallus gallus]	103.05	15.3	11	12	11	0.931	1.075	0.983	1.051	0.943	1.015	1.099	0.136191	0.0155043
420003	NP_001026100.1	60S ribosomal protein L19 [Gallus gallus]	23.413	40.3	10	29	10	1.004	1.025	0.969	1.089	0.839	1.063	1.13	0.176323	0.09656
420054	NP_001026103.1	heterogeneous nuclear ribonucleoprotein M [Gallus gallus]	76.022	46.8	36	73	36	1.02	1.045	1.005	1.011	0.972	0.977	1.012	0.0172093	0.65088
420087	NP_001026105.1	acidic leucine-rich nuclear phosphoprotein 32 family member B [Gallus gallus]	29.943	19.5	5	7	3
420098	NP_001026106.1	polypyrimidine tract-binding protein 1 [Gallus gallus]	56.698	30.6	12	26	12	0.985	1.122	0.957	1.027	0.906	1.01	1.109	0.149259	0.064836
420100	NP_001026107.1	WD repeat-containing protein 18 [Gallus gallus]	43.495	7.3	2	2	2	0.995	0.913	1.08	0.93	1.121	0.976	0.882	-0.181149	0.036839
420215	NP_001026114.1	receptor-interacting serine/threonine-protein kinase 2 [Gallus gallus]	63.971	19	9	9	9	0.963	0.972	0.991	0.976	1.013	1.051	1.011	0.015783	0.74324
420263	NP_001026119.1	DDB1- and CUL4-associated factor 13 [Gallus gallus]	51.428	30.1	11	15	11	1.009	1.035	1.018	0.986	0.961	1.003	1.012	0.0172093	0.62478
420286	NP_001026121.1	double-strand-break repair protein rad21 homolog [Gallus gallus]	72.05	10.1	5	5	5	1.035	0.947	1.046	1.026	0.973	0.926	0.949	-0.07552	0.24336
420288	NP_001026122.1	eukaryotic translation initiation factor 3 subunit H [Gallus gallus]	39.536	46.6	14	19	14	0.973	1.089	0.977	1.031	0.917	0.981	1.082	0.1137	0.099242
420396	NP_001026129.2	putative transferase CAF17, mitochondrial [Gallus gallus]	36.128	9	2	2	2
420420	NP_001026133.2	myeloid differentiation primary response protein MyD88 [Gallus gallus]	33.781	6.4	1	1	1
420426	NP_001026134.1	Golgi reassembly-stacking protein 1 [Gallus gallus]	45.445	17.4	5	5	5	0.985	1.051	1.011	1.039	1.015	0.918	0.999	-0.00144342	0.95338
420574	NP_001026148.1	asparagine synthetase [glutamine-hydrolyzing] [Gallus gallus]	64.096	39.2	19	44	1	0.916	1.032	0.874	1.102	0.918	1.156	1.215	0.280956	0.0060958
420593	NP_001026150.1	ankyrin repeat and MYND domain-containing protein 2 [Gallus gallus]	51.649	22	7	7	7	1.036	1.015	0.938	1.021	0.971	1.035	1.043	0.0607392	0.22368
420655	NP_001026159.1	peptide-N(4)-(N-acetyl-beta-glucosaminyl)asparagine amidase [Gallus gallus]	73.902	9.1	6	7	6	0.863	1.059	0.983	0.967	1.011	1.067	1.083	0.115033	0.23716
420682	NP_001026160.2	SH3 domain-binding protein 5 [Gallus gallus]	46.955	3.3	2	2	2	1.027	0.985	0.936	1.077	0.955	1.029	1.059	0.0827026	0.20518
420850	NP_001026170.1	p21-activated protein kinase-interacting protein 1-like [Gallus gallus]	41.232	11.7	4	4	4	1.048	0.983	1.04	1.006	0.93	1.059	1.01	0.0143553	0.8187
420923	NP_001026174.1	death-associated protein 1 [Gallus gallus]	11.506	15.4	2	3	2	0.876	0.886	1.116	0.955	1.172	1.009	0.901	-0.150401	0.37168
420938	NP_001026175.1	tRNA (cytosine(34)-C(5))-methyltransferase [Gallus gallus]	90.844	25.1	17	20	17	0.989	1.016	0.958	1.046	0.962	1.015	1.058	0.0813396	0.0161599
420953	NP_001026176.1	regulation of nuclear pre-mRNA domain-containing protein 1A [Gallus gallus]	30.836	11.6	3	4	3	1.072	0.941	1.039	1.075	0.959	0.93	0.96	-0.0588937	0.49958
420993	NP_001026179.1	testis-expressed protein 10 homolog [Gallus gallus]	105.39	7.4	5	5	5	0.989	0.983	0.958	1.026	0.967	1.023	1.04	0.0565835	0.077138
421037	NP_001026183.1	tubulin beta-5 chain [Gallus gallus]	49.971	46.2	17	67	5	0.967	1.02	0.91	1.049	1.019	1.05	1.077	0.107018	0.091858
421109	NP_001026189.1	ubiquitin-conjugating enzyme E2 variant 2 [Gallus gallus]	16.305	54.2	7	11	4	0.999	1.002	0.892	1	1.03	1.083	1.056	0.0786098	0.33542
421130	NP_001026193.1	epidermal retinol dehydrogenase 2 [Gallus gallus]	33.602	24.6	6	7	6	1.074	0.895	1.097	0.955	1.063	0.932	0.86	-0.217591	0.0020182
421236	NP_001026204.1	5'-3' exoribonuclease 2 [Gallus gallus]	108.54	16	12	14	12	0.965	1.074	1.009	0.996	0.941	1.071	1.078	0.108357	0.080581
421248	NP_001026205.1	glycogen phosphorylase, brain form [Gallus gallus]	96.729	11	8	10	3
421301	NP_001026209.1	protein LBH [Gallus gallus]	12.094	36.8	2	4	2	0.835	1.02	0.865	1.14	1.018	1.114	1.205	0.269033	0.053862
421306	NP_001026211.1	EH domain-containing protein 3 [Gallus gallus]	60.894	53.6	27	62	24	0.957	1.041	0.935	1.063	0.933	1.059	1.12	0.163499	0.00040115
421313	NP_001026212.2	tRNA (adenine(58)-N(1))-methyltransferase non-catalytic subunit TRM6 [Gallus gallus]	54.268	7.6	3	3	3	0.998	0.922	1.041	1.012	0.982	1.049	0.987	-0.018878	0.75974
421352	NP_001026216.2	transforming growth factor beta-2 precursor [Gallus gallus]	47.622	14.3	6	6	6	0.752	1.251	0.765	1.327	0.717	1.154	1.671	0.740712	0.00033865
421384	NP_001026222.1	digestive organ expansion factor homolog [Gallus gallus]	88.949	4.7	4	4	4	0.953	0.933	1.085	0.974	0.97	1.084	0.994	-0.00868224	0.92548
421464	NP_001026229.1	protein YIPF4 [Gallus gallus]	27.699	3.6	1	1	1	0.992	1.037	0.923	0.994	0.969	1.087	1.081	0.112367	0.080543
421467	NP_001026230.2	N-acylneuraminate-9-phosphatase [Gallus gallus]	28.501	20.3	4	4	4	0.887	0.957	1.033	0.98	1.062	1.087	1.014	0.0200577	0.83136
421474	NP_001026231.1	CCAAT/enhancer-binding protein zeta [Gallus gallus]	122.59	9.4	10	10	10	0.895	1.078	1.008	1.104	0.87	1.106	1.186	0.246104	0.0198
421635	NP_001026241.1	zinc finger and BTB domain-containing protein 2 [Gallus gallus]	56.894	4.5	1	1	1	1.08	0.902	1.088	1.018	0.973	0.952	0.914	-0.129734	0.149616
421741	NP_001026246.2	RWD domain-containing protein 1 [Gallus gallus]	27.982	7.9	3	4	3	1.042	0.864	0.976	1.054	1.087	0.993	0.938	-0.0923402	0.37228
421773	NP_001026248.1	osteopetrosis-associated transmembrane protein 1 precursor [Gallus gallus]	33.542	7.5	2	2	2	0.963	1.022	0.992	1.029	0.961	1.039	1.06	0.0840643	0.0068413
421916	NP_001026259.1	EARP-interacting protein [Gallus gallus]	30.537	28.9	6	6	6	1.214	0.838	1.138	0.888	0.832	1.08	0.881	-0.182786	0.4412
421918	NP_001026260.1	1,2-dihydroxy-3-keto-5-methylthiopentene dioxygenase [Gallus gallus]	21.674	11.7	2	2	2
421994	NP_001026268.1	ras-related protein Rab-10 [Gallus gallus]	22.549	32	9	13	9	0.925	1.032	1.023	1.031	1.005	1.042	1.051	0.0717627	0.24308
422110	NP_001026278.1	transmembrane protein 104 [Gallus gallus]	56.118	2.2	1	1	1
422173	NP_001026283.1	uncharacterized protein LOC422173 [Gallus gallus]	27.525	48.9	11	20	9	1.063	0.927	1.044	0.86	1.083	0.983	0.868	-0.204233	0.023704
422178	NP_001026285.1	chloride intracellular channel protein 2 [Gallus gallus]	28.134	64.8	12	27	12	1.009	0.927	1.012	0.975	1.074	1.029	0.947	-0.0785637	0.2053
422196	NP_001026286.1	H/ACA ribonucleoprotein complex subunit DKC1 [Gallus gallus]	58.15	24	11	14	11	1.031	1.059	1.009	1.001	0.923	0.98	1.026	0.0370307	0.55694
422266	NP_001026290.1	rab proteins geranylgeranyltransferase component A 1 [Gallus gallus]	73.09	19.2	11	12	11	0.953	1.016	0.935	1.019	0.976	1.084	1.089	0.123004	0.025598
422327	NP_001026295.1	uracil phosphoribosyltransferase homolog [Gallus gallus]	30.085	3.2	1	1	1
422369	NP_001026296.1	septin-6 [Gallus gallus]	48.687	31.5	12	24	6	0.982	0.978	1.014	0.999	1.052	0.993	0.974	-0.0380063	0.28782
422385	NP_001026298.1	vacuolar ATPase assembly integral membrane protein VMA21 [Gallus gallus]	11.578	11.8	1	1	1
422523	NP_001026306.1	protein transport protein Sec24B [Gallus gallus]	134.57	3.3	3	3	2	0.983	0.939	1.112	0.871	1.137	0.972	0.861	-0.215915	0.055444
422585	NP_001026311.1	polycystin-2 [Gallus gallus]	100.59	5.9	5	5	5
422684	NP_001026319.1	N6-adenosine-methyltransferase non-catalytic subunit [Gallus gallus]	52.52	4.1	2	2	2	0.998	0.978	1.097	0.99	1.077	0.883	0.899	-0.153607	0.082099
422699	NP_001026320.1	PDZ and LIM domain protein 5 [Gallus gallus]	64.119	30.6	17	43	17	1.089	0.888	1.071	0.916	1.148	0.921	0.824	-0.279284	0.00124295
422701	NP_001026321.1	rap1 GTPase-GDP dissociation stimulator 1 [Gallus gallus]	66.268	33.1	16	29	16	0.96	0.966	0.964	0.986	1.058	1.018	0.996	-0.00578235	0.93092
422704	NP_001026322.1	methionine aminopeptidase 1 [Gallus gallus]	43.121	43.4	13	15	13	0.991	0.996	1.03	0.991	0.989	1.02	0.999	-0.00144342	0.9576
422705	NP_001026323.1	alcohol dehydrogenase class-3 [Gallus gallus]	39.591	36.4	11	22	11	1.027	0.924	0.985	1.01	1.092	0.982	0.939	-0.0908029	0.193059
422713	NP_001026324.1	ubiquitin-conjugating enzyme E2 D3 [Gallus gallus]	16.687	12.2	2	5	1
422813	NP_001026330.1	pre-mRNA-splicing factor ATP-dependent RNA helicase DHX15 [Gallus gallus]	87.713	28.7	20	32	19	0.966	0.985	1.024	0.967	1.022	1.013	0.984	-0.0232698	0.54294
422824	NP_001026332.2	transmembrane anterior posterior transformation protein 1 homolog [Gallus gallus]	65.775	3.4	2	2	2	1.011	0.995	1.008	1.077	0.968	0.955	1.013	0.0186342	0.7632
422896	NP_001026338.1	negative elongation factor A [Gallus gallus]	58.994	6.9	3	3	3	0.951	1.072	1.225	0.925	0.999	0.845	0.895	-0.16004	0.3517
422931	NP_001026341.1	ribose-5-phosphate isomerase [Gallus gallus]	25.646	10.6	2	2	2	1.008	1.107	0.881	1.149	0.665	1.174	1.343	0.425459	0.12968
422980	NP_001026342.1	palmitoyltransferase ZDHHC13 [Gallus gallus]	61.276	7.2	3	4	2	0.999	1.094	1.035	0.816	0.889	1.154	1.048	0.0676387	0.76186
422984	NP_001026343.1	vacuolar protein sorting-associated protein 51 homolog [Gallus gallus]	86.058	16.3	9	10	9	0.935	1.006	0.98	1.005	0.992	1.033	1.047	0.0662614	0.083299
423019	NP_001026348.1	transaldolase [Gallus gallus]	37.611	39.5	14	27	14	0.97	1.004	0.949	1.04	0.994	1.056	1.064	0.0894982	0.036263
423044	NP_001026351.1	switch-associated protein 70 [Gallus gallus]	68.411	15.7	10	10	10	1.051	0.962	1.046	0.959	1.067	0.963	0.912	-0.132894	0.00011557
423230	NP_001026365.1	vam6/Vps39-like protein [Gallus gallus]	100.52	8.6	7	7	7	1.053	0.972	1.075	0.967	1.073	0.993	0.916	-0.12658	0.00110275
423244	NP_001026366.2	prostaglandin reductase 2 [Gallus gallus]	38.139	2.5	1	1	1	0.966	0.909	1.045	1.053	1.054	0.987	0.962	-0.0558912	0.47894
423249	NP_001026367.1	ribosomal oxygenase 1 [Gallus gallus]	65.684	18.1	9	11	9	0.95	1.104	1.002	1.029	0.94	0.999	1.083	0.115033	0.090202
423302	NP_001026372.1	serine/threonine-protein kinase D1 [Gallus gallus]	91.457	7.3	4	5	4	0.949	1.003	0.963	1.015	1.076	1.008	1.013	0.0186342	0.75512
423323	NP_001026373.1	protein FAM177A1 [Gallus gallus]	23.973	18.8	3	6	3	0.997	1.115	0.942	1.021	0.924	1.017	1.101	0.138814	0.063461
423353	NP_001026374.1	NPC intracellular cholesterol transporter 2 precursor [Gallus gallus]	16.22	45.3	5	7	5	1.061	0.974	1.032	0.963	1.041	0.923	0.913	-0.131313	0.0074369
423389	NP_001026378.2	transcription initiation factor IIA subunit 1 [Gallus gallus]	41.754	2.9	1	2	1	1.01	1.044	0.979	1.015	1.004	0.962	1.009	0.0129262	0.74962
423560	NP_001026385.1	glia maturation factor beta [Gallus gallus]	16.723	67.6	8	13	8	1.003	0.838	0.991	0.935	1.12	1.056	0.908	-0.139236	0.26988
423600	NP_001026386.2	catalase [Gallus gallus]	59.802	31.1	16	20	16	1.001	1.059	0.975	1.016	1.019	0.972	1.017	0.0243197	0.57996
423621	NP_001026388.2	growth hormone-inducible transmembrane protein [Gallus gallus]	36.579	6.4	2	3	2	0.933	1.016	1.036	1.027	0.974	1.021	1.041	0.0579701	0.30978
423666	NP_001026392.1	coiled-coil domain-containing protein 6 [Gallus gallus]	53.294	26.6	10	11	10	1.046	0.958	0.958	1.075	0.944	1.017	1.035	0.0496308	0.50312
423670	NP_001026394.2	erlin-1 [Gallus gallus]	38.907	20.7	8	13	5	0.982	1.023	1.014	0.986	1.02	0.969	0.987	-0.018878	0.55458
423723	NP_001026397.1	peptidyl-prolyl cis-trans isomerase F, mitochondrial [Gallus gallus]	21.707	16.7	4	5	3	0.934	1.033	0.991	1.087	0.931	1.029	1.103	0.141433	0.022116
423809	NP_001026401.1	kinesin-like protein KIF11 [Gallus gallus]	119.95	0.7	1	1	1	1.026	0.994	0.971	1.021	1.026	0.977	0.99	-0.0144996	0.67426
423872	NP_001026406.1	transcription initiation factor TFIID subunit 5 [Gallus gallus]	85.539	11	5	5	5	1.026	0.927	0.915	1.003	1.07	1.068	0.996	-0.00578235	0.95374
423947	NP_001026411.1	short/branched chain specific acyl-CoA dehydrogenase, mitochondrial [Gallus gallus]	47.744	30.9	11	16	11	1.014	1.016	1.009	0.976	0.983	0.983	0.99	-0.0144996	0.54238
423954	NP_001026412.1	BRISC complex subunit Abraxas 2 [Gallus gallus]	39.594	19.6	6	6	6	0.96	0.994	0.955	1.038	1.069	0.999	1.016	0.0229004	0.69028
423979	NP_001026414.1	3-hydroxyisobutyryl-CoA hydrolase, mitochondrial [Gallus gallus]	42.828	29.4	11	13	11	0.964	1.095	1.016	0.999	0.952	0.967	1.044	0.0621217	0.37552
424006	NP_001026416.2	lanC-like protein 1 [Gallus gallus]	45.259	10.5	3	5	3	0.973	0.819	0.902	1.167	1.07	1.081	1.041	0.0579701	0.80128
424032	NP_001026418.1	NADH dehydrogenase [ubiquinone] 1 alpha subcomplex subunit 10, mitochondrial [Gallus gallus]	41.431	30.5	12	21	12	1.004	1.026	1.004	1.003	0.987	0.989	1.008	0.0114956	0.5662
424043	NP_001026419.1	glutaminase kidney isoform, mitochondrial precursor [Gallus gallus]	73.511	20.2	12	20	1	0.974	1.075	1.107	0.899	1.029	0.928	0.933	-0.100051	0.34556
424128	NP_001026422.1	pleckstrin homology domain-containing family A member 3 [Gallus gallus]	33.897	4	1	1	1
424132	NP_001026423.1	RNA-binding protein 45 [Gallus gallus]	56.349	14.3	6	6	6	1.029	0.894	1.023	1.056	0.874	1.119	1.049	0.0690147	0.62032
424144	NP_001026425.1	obg-like ATPase 1 [Gallus gallus]	44.778	46	16	24	16	1.042	0.937	1.002	0.959	1.018	1.021	0.953	-0.0694519	0.155276
424211	NP_001026430.1	E3 ubiquitin-protein ligase RNF25 [Gallus gallus]	46.123	2.9	1	2	1	0.998	1.221	0.802	1.068	0.711	1.186	1.384	0.468844	0.035962
424256	NP_001026431.1	uridine 5'-monophosphate synthase [Gallus gallus]	51.826	32.8	14	21	14	0.989	0.999	1.021	0.993	1.024	1.005	0.988	-0.0174171	0.35604
424277	NP_001026433.1	coiled-coil domain-containing protein 93 [Gallus gallus]	71.718	19.4	13	15	13	0.963	0.95	0.974	1.024	1.026	1.001	1.004	0.00575927	0.90056
424356	NP_001026436.1	parafibromin [Gallus gallus]	60.697	20.7	10	10	10	0.891	1.049	1.002	1.061	0.948	1	1.095	0.130931	0.076517
424377	NP_001026437.1	vesicle-trafficking protein SEC22b precursor [Gallus gallus]	24.717	68.4	13	24	13	0.973	0.998	0.977	1.04	0.966	0.992	1.039	0.0551957	0.066262
424446	NP_001026442.1	ral guanine nucleotide dissociation stimulator-like 1 [Gallus gallus]	86.995	1.3	1	1	1
424635	NP_001026455.1	nardilysin [Gallus gallus]	132.23	12.2	14	17	14	1	1.04	0.922	0.968	1.026	1.015	1.025	0.0356239	0.5407
424638	NP_001026456.1	transcription factor BTF3 homolog 4 [Gallus gallus]	17.232	27.2	5	5	5	0.954	1.03	0.912	0.965	1.107	1.044	1.022	0.0313952	0.71504
424649	NP_001026458.2	carnitine O-palmitoyltransferase 2, mitochondrial precursor [Gallus gallus]	73.907	33.9	16	20	16	0.985	0.972	1.003	1.074	0.956	1.006	1.037	0.0524159	0.33694
424661	NP_001026459.1	delta(24)-sterol reductase [Gallus gallus]	60.122	7.8	5	5	5	0.951	1.088	1.046	0.887	0.982	0.956	0.984	-0.0232698	0.7869
424673	NP_001026460.1	transcription factor AP-1 [Gallus gallus]	33.94	11.6	3	3	2	1.021	1.012	0.953	1.139	0.862	1.019	1.118	0.16092	0.146002
424706	NP_001026464.1	plasminogen activator inhibitor 1 RNA-binding protein [Gallus gallus]	45.534	41.4	16	30	16	0.942	1.091	0.929	1.083	0.878	1.025	1.164	0.219091	0.0065161
424707	NP_001026465.1	protein wntless homolog precursor [Gallus gallus]	62.136	10.2	5	6	5	0.888	1.046	1.002	1.116	0.9	1.047	1.15	0.201634	0.0324
424713	NP_001026466.1	leucine-rich repeat-containing protein 40 [Gallus gallus]	67.475	10.8	6	6	6	1.008	0.97	1.058	0.92	1.067	0.988	0.919	-0.121863	0.037556
424714	NP_001026467.1	serine/arginine-rich splicing factor 11 [Gallus gallus]	51.48	11.8	4	5	4	0.95	1.005	1.016	1.109	1.012	0.946	1.028	0.0398403	0.6448
424726	NP_001026469.1	SAGA-associated factor 29 [Gallus gallus]	33.111	3.8	1	1	1	0.974	0.992	1.016	0.958	1.077	0.996	0.961	-0.0573917	0.27956
424781	NP_001026478.1	RING-box protein 2 [Gallus gallus]	12.79	18.4	2	2	2
424806	NP_001026481.1	WD repeat and FYVE domain-containing protein 1 [Gallus gallus]	46.381	17.1	6	7	6	1.112	0.956	1.126	0.946	0.964	0.884	0.87	-0.200913	0.068756
424906	NP_001026486.1	coiled-coil domain-containing protein 50 [Gallus gallus]	35.499	18.3	5	6	5	1.007	0.92	1	1.077	0.961	1.031	1.02	0.0285692	0.73224
424921	NP_001026487.1	UAP56-interacting factor [Gallus gallus]	34.331	12.7	4	4	4	0.978	1.007	1.013	1.063	0.96	1.04	1.054	0.0758749	0.077836
424963	NP_001026489.1	DCN1-like protein 1 [Gallus gallus]	30.109	33.2	8	10	3	0.998	0.848	0.966	1.046	1.026	1.064	0.989	-0.0159576	0.84496
425017	NP_001026492.1	major facilitator superfamily domain-containing protein 1 [Gallus gallus]	48.162	3.8	1	3	1
425042	NP_001026494.1	eukaryotic translation initiation factor 2A [Gallus gallus]	64.503	25.9	10	15	10	1.024	0.99	0.958	0.973	1	1.04	1.007	0.0100637	0.8143
425058	NP_001026495.1	SAP domain-containing ribonucleoprotein [Gallus gallus]	23.462	38.1	7	9	7	1.008	1.014	0.938	1.08	0.907	1.043	1.1	0.137504	0.057142
425070	NP_001026499.1	KH homology domain-containing protein 4 [Gallus gallus]	65.051	1.8	1	1	1	1.086	1.054	1.017	0.944	0.955	0.954	0.965	-0.0513992	0.52932
425237	NP_001026505.1	ribosomal RNA processing protein 1 homolog B [Gallus gallus]	84.407	13.8	9	11	9	0.923	1.122	1.036	1.022	0.95	0.955	1.065	0.0908534	0.34472
425306	NP_001026507.1	cytosol aminopeptidase [Gallus gallus]	56.33	25.7	11	14	11	0.974	0.997	1.021	1.024	0.996	0.996	1.009	0.0129262	0.62082
425375	NP_001026508.2	serine/threonine-protein kinase 3 [Gallus gallus]	56.138	26.3	12	15	9	1.004	1.003	0.986	1.041	0.997	0.974	1.01	0.0143553	0.64322
425389	NP_001026509.1	Major histocompatibility complex class I antigen BF2 precursor [Gallus gallus]	38.959	7.3	3	4	2
425619	NP_001026514.1	14-3-3 protein zeta [Gallus gallus]	27.775	49.4	15	77	9	1.014	0.924	1.001	0.988	1.075	1.011	0.946	-0.0800879	0.183936
425858	NP_001026519.1	vacuolar protein sorting-associated protein 33B [Gallus gallus]	70.065	16.4	8	8	8	0.966	1.081	0.97	1.042	0.947	1.003	1.084	0.116365	0.024384
425972	NP_001026523.2	pyruvate dehydrogenase kinase, isozyme 1 [Gallus gallus]	46.484	2.2	1	1	1	1.007	1.031	1.031	1.071	0.823	1.036	1.097	0.133564	0.25086
426089	NP_001026526.1	multivesicular body subunit 12A [Gallus gallus]	28.062	4.9	1	1	1	1.103	1.08	0.943	0.909	1.072	0.913	0.931	-0.103147	0.38362
426116	NP_001026528.1	BLOC-1-related complex subunit 5 [Gallus gallus]	20.934	6.5	1	1	1
426121	NP_001026530.2	39S ribosomal protein L28, mitochondrial [Gallus gallus]	29.583	21.9	5	8	5	1.035	1.082	1.005	0.97	0.936	1.013	1.03	0.0426443	0.53776
426126	NP_001026531.1	bifunctional methylenetetrahydrofolate dehydrogenase/cyclohydrolase, mitochondrial [Gallus gallus]	36.411	33.2	8	12	8	1.006	1.048	1.009	1.015	0.974	0.982	1.019	0.0271541	0.44988
426133	NP_001026533.1	26S proteasome non-ATPase regulatory subunit 3 [Gallus gallus]	59.396	34.7	18	37	18	0.982	1.005	1.001	1.014	0.983	1.014	1.023	0.0328061	0.031598
426134	NP_001026534.1	mediator of RNA polymerase II transcription subunit 24 [Gallus gallus]	110.84	3.9	2	2	2	0.975	0.961	1.079	1.071	0.923	0.996	1.017	0.0243197	0.7621
426265	NP_001026539.1	serine and arginine rich splicing factor 7 [Gallus gallus]	26.001	37.2	9	27	1
426329	NP_001026542.1	serine/threonine-protein phosphatase 2A activator [Gallus gallus]	36.739	40.2	11	17	11	1.006	0.914	1.01	0.955	1.086	0.986	0.92	-0.120294	0.067079
426381	NP_001026547.1	polycomb protein EED [Gallus gallus]	50.377	4	2	2	2	1.126	1.026	1.001	0.954	0.888	1.008	0.991	-0.013043	0.95022
426384	NP_001026548.1	protein FAM76A [Gallus gallus]	34.92	13	4	5	3	1.089	0.999	0.929	0.971	0.982	1.014	0.995	-0.00723157	0.94838
426402	NP_001026551.1	poly(U)-binding-splicing factor PUF60 [Gallus gallus]	38.896	38.5	11	17	11	1.02	1.025	0.98	0.981	0.994	0.992	1.001	0.00144197	0.94478
426573	NP_001026558.1	isocitrate dehydrogenase [NAD] subunit beta, mitochondrial [Gallus gallus]	42.331	25.5	8	11	8	0.978	1.029	1.001	1.031	0.952	1.011	1.048	0.0676387	0.041263
426574	NP_001026559.1	nucleolar protein 56 [Gallus gallus]	59.832	37	15	30	15	0.998	1.012	1.064	0.988	0.944	0.997	0.997	-0.00433459	0.96066
426673	NP_001026562.2	ATP synthase subunit beta, mitochondrial precursor [Gallus gallus]	56.628	54.8	21	111	21	0.973	1.027	0.994	1.04	0.95	1.012	1.056	0.0786098	0.023877
426697	NP_001026563.1	serine--tRNA ligase, cytoplasmic [Gallus gallus]	58.303	38.9	19	27	19	1.025	0.991	0.979	0.97	0.984	0.989	0.987	-0.018878	0.47536
426774	NP_001026566.1	set1/Ash2 histone methyltransferase complex subunit ASH2 [Gallus gallus]	67.071	10.8	5	6	5	1.027	0.971	0.975	0.935	0.978	1.022	0.983	-0.0247367	0.59048
426781	NP_001026567.2	disintegrin and metalloproteinase domain-containing protein 9 precursor [Gallus gallus]	93.889	5.9	4	4	4	0.976	0.851	0.962	1.032	1.014	1.163	1.032	0.045443	0.8122
426792	NP_001026568.1	inhibitor of nuclear factor kappa-B kinase subunit beta [Gallus gallus]	84.988	5.1	3	3	3	1.038	1.107	1.289	0.884	0.838	0.85	0.898	-0.155213	0.54092
426849	NP_001026570.1	protein ERGIC-53 precursor [Gallus gallus]	56.519	45.7	22	43	22	1.001	1.025	0.982	0.989	0.959	0.997	1.023	0.0328061	0.23118
426856	NP_001026571.1	asparagine--tRNA ligase, cytoplasmic [Gallus gallus]	64.099	35.8	19	31	19	0.983	1.037	0.939	1.017	0.975	1.019	1.061	0.0854247	0.018459
426885	NP_001026573.1	histone deacetylase 7 [Gallus gallus]	103.39	2.9	2	2	2
426906	NP_001026576.1	coatomer subunit alpha [Gallus gallus]	138.55	43.7	51	84	51	0.988	0.997	0.985	0.98	1.019	1.012	0.999	-0.00144342	0.949
426918	NP_001026577.1	STIP1 homology and U box-containing protein 1 [Gallus gallus]	35.661	31.2	8	9	8	1.033	0.986	1.04	0.935	0.946	0.973	0.959	-0.0603973	0.29338
426937	NP_001026578.1	proteasome subunit alpha type-5 [Gallus gallus]	26.447	58.1	10	21	10	0.99	0.996	0.943	1.069	0.994	0.978	1.04	0.0565835	0.29598
426942	NP_001026579.1	DET1- and DDB1-associated protein 1 [Gallus gallus]	11.884	18.6	2	2	2
427066	NP_001026584.1	deoxyhypusine hydroxylase [Gallus gallus]	32.875	27.4	5	6	5	1.007	0.921	0.934	1.049	1.11	1.062	0.994	-0.00868224	0.93592
427106	NP_001026585.1	lysM and putative peptidoglycan-binding domain-containing protein 3 [Gallus gallus]	33.415	11.3	2	2	2
427116	NP_001026586.1	arylsulfatase K precursor [Gallus gallus]	61.401	7.9	4	4	4
427127	NP_001026588.1	protein PRRC1 [Gallus gallus]	45.812	25.2	10	17	10	0.925	0.998	0.919	1.08	0.921	1.093	1.147	0.197865	0.041342
427166	NP_001026589.1	small glutamine-rich tetratricopeptide repeat-containing protein beta [Gallus gallus]	33.873	8.6	3	5	3	1.136	1.152	0.953	0.806	0.949	1.008	0.976	-0.0350469	0.80824
427237	NP_001026591.1	perilipin-2 [Gallus gallus]	47.245	35.7	13	15	13	0.832	1.097	0.93	1.128	0.805	1.115	1.301	0.379621	0.0039579
427258	NP_001026597.2	osteoclast-stimulating factor 1 [Gallus gallus]	23.617	59.8	9	18	9	0.979	0.954	0.976	0.942	1.106	1.034	0.957	-0.0634092	0.4434
427262	NP_001026598.1	guanine nucleotide-binding protein G(q) subunit alpha [Gallus gallus]	42.234	20.6	7	11	3	0.993	1.085	1.055	0.994	0.926	0.957	1.021	0.0299829	0.71622
427294	NP_001026604.1	alpha-L-iduronidase precursor [Gallus gallus]	71.563	8.4	3	4	3	1.033	0.966	1.065	0.983	0.929	0.97	0.964	-0.0528949	0.49358
427337	NP_001026606.1	prostaglandin reductase 1 [Gallus gallus]	35.907	23.4	6	9	6	1.03	0.924	0.878	0.97	1.17	1.045	0.955	-0.0664274	0.67638
427347	NP_001026607.1	COBW domain-containing protein 1 [Gallus gallus]	40.991	4.3	1	1	1
427350	NP_001026608.1	pumilio homolog 3 [Gallus gallus]	69.837	8.7	6	8	6	1.047	1.015	1.033	1.022	0.917	0.974	1.005	0.0071955	0.89668
427379	NP_001026611.1	nuclear cap-binding protein subunit 1 [Gallus gallus]	92.563	12.4	8	11	8	1.054	1.039	1.016	0.955	1.011	0.97	0.962	-0.0558912	0.24822
427404	NP_001026616.1	dynactin subunit 3 [Gallus gallus]	21.049	65.9	12	19	12	1.024	1.069	0.961	1.01	0.993	1.002	1.035	0.0496308	0.2836
427427	NP_001026618.1	threonine--tRNA ligase, cytoplasmic [Gallus gallus]	81.815	38	24	41	21	1.015	0.949	0.966	0.974	1.081	0.995	0.953	-0.0694519	0.25144
427429	NP_001026619.1	alpha-methylacyl-CoA racemase [Gallus gallus]	41.74	13.3	4	4	4	0.89	1.037	0.869	1.169	1.035	1.016	1.153	0.205393	0.109695
427433	NP_001026620.1	ribosome biogenesis protein BRX1 homolog [Gallus gallus]	40.332	22.3	7	8	7	0.989	1.005	1.039	0.947	1.068	1.024	0.961	-0.0573917	0.29108
427490	NP_001026625.1	iron-responsive element-binding protein 2 [Gallus gallus]	105.36	2.1	2	3	2
427548	NP_001026629.1	nucleoside diphosphate-linked moiety X motif 19 precursor [Gallus gallus]	42.122	9.3	2	2	2
427573	NP_001026634.1	macrophage-stimulating protein receptor precursor [Gallus gallus]	153.85	4.7	5	5	5	1.024	0.953	1.095	1.053	0.912	0.971	0.982	-0.0262051	0.8067
427663	NP_001026637.1	transmembrane protein 11, mitochondrial [Gallus gallus]	21.734	14.4	3	4	3	0.855	1.054	1.103	1.039	0.967	0.99	1.054	0.0758749	0.48996
427672	NP_001026638.1	probable glutamate--tRNA ligase, mitochondrial precursor [Gallus gallus]	56.954	7	3	4	3	0.973	1.067	1.044	0.963	0.939	1.018	1.031	0.0440443	0.51404
427679	NP_001026639.1	phosphomannomutase 2 [Gallus gallus]	28.324	48.2	11	13	10	1.042	0.86	1.007	0.909	1.17	0.99	0.857	-0.222633	0.065655
427694	NP_001026640.1	protein strawberry notch homolog 1 [Gallus gallus]	137.18	6.3	5	7	5	0.947	1.103	1.062	0.982	0.959	1.112	1.077	0.107018	0.24298
427713	NP_001026642.1	sin3 histone deacetylase corepressor complex component SDS3 [Gallus gallus]	36.731	8.3	3	4	3	0.947	0.602	1.289	1.049	1.176	0.955	0.764	-0.388355	0.2113
427717	NP_001026643.2	splicing factor 3A subunit 1 [Gallus gallus]	88.486	25.8	20	25	20	1.025	1.017	1.01	1.006	0.952	0.974	1.003	0.00432161	0.89442
427820	NP_001026648.1	14-3-3 protein gamma [Gallus gallus]	28.23	49	12	50	5	1.013	0.906	1.045	0.961	1.131	0.99	0.896	-0.158429	0.05912
427952	NP_001026656.1	WD repeat-containing protein 3 [Gallus gallus]	105.51	18.5	15	17	15	0.932	1	1.037	1.054	0.928	1.006	1.056	0.0786098	0.235
427978	NP_001026657.1	28S ribosomal protein S6, mitochondrial [Gallus gallus]	13.85	13.2	2	2	2	0.948	1.052	1.018	1.017	0.961	1.011	1.052	0.0731347	0.110583
428128	NP_001026661.1	TBC1 domain family member 22A [Gallus gallus]	59.754	10.4	5	5	5	0.889	0.966	1.032	1.148	0.999	0.98	1.06	0.0840643	0.4713
428163	NP_001026662.2	lysosomal protective protein precursor [Gallus gallus]	53.182	30.4	10	31	10	1.049	0.957	1.074	0.939	1.015	0.934	0.902	-0.148801	0.0045771
428216	NP_001026665.1	serine/arginine repetitive matrix protein 1 [Gallus gallus]	100.8	5.2	4	5	4	0.926	1.063	0.919	1.105	0.944	1.05	1.154	0.206643	0.0011803
428281	NP_001026672.1	116 kDa U5 small nuclear ribonucleoprotein component [Gallus gallus]	109.48	38.4	31	50	30	0.975	1.059	1.004	1.014	0.953	1.001	1.048	0.0676387	0.106577
428312	NP_001026673.2	dnaJ homolog subfamily C member 7 [Gallus gallus]	56.468	24	12	13	12	0.999	1	0.975	1.018	1.032	1.019	1.01	0.0143553	0.58226
428352	NP_001026675.1	ras-related protein Rab-8A [Gallus gallus]	23.522	35.3	9	13	6	0.957	0.975	1.035	0.999	1.022	1.04	1	0	0.99438
428387	NP_001026678.1	transmembrane protein 65 [Gallus gallus]	18.88	11.9	2	5	1
428403	NP_001026681.1	glycine--tRNA ligase [Gallus gallus]	77.58	43.6	28	62	27	1.088	0.948	1.02	0.912	1.105	0.959	0.877	-0.189351	0.010624
428418	NP_001026683.1	ATP-dependent zinc metalloprotease YME1L1 [Gallus gallus]	81.136	19.1	11	13	11	0.903	1.067	0.943	1.093	0.921	1.02	1.149	0.200379	0.0043165
428444	NP_001026684.1	dolichyl-diphosphooligosaccharide--protein glycosyltransferase subunit STT3B [Gallus gallus]	88.543	17.3	14	20	11	0.953	1.054	0.96	1.055	0.922	1.029	1.107	0.146655	0.0023975
428579	NP_001026692.1	adenylosuccinate synthetase isozyme 2 [Gallus gallus]	49.454	43.7	17	26	16	1.05	0.963	1.056	0.911	1.104	0.945	0.878	-0.187707	0.0046404
428583	NP_001026693.2	GPI mannosyltransferase 1 [Gallus gallus]	46.605	3.1	1	1	1
428588	NP_001026694.1	cancer-related nucleoside-triphosphatase [Gallus gallus]	20.85	24.7	4	6	4	0.973	1.021	0.939	1.087	1.004	0.99	1.062	0.0867838	0.148021
428673	NP_001026700.1	charged multivesicular body protein 6 [Gallus gallus]	23.258	23	6	7	6	1.018	1.04	1.014	1	0.991	0.95	0.989	-0.0159576	0.6952
428704	NP_001026704.1	sorting nexin-12 [Gallus gallus]	18.911	56.2	10	15	9	1.037	0.901	1.01	0.992	1.104	0.985	0.913	-0.131313	0.089236
428748	NP_001026707.1	trafficking protein particle complex subunit 11 [Gallus gallus]	128.55	8.1	8	11	8	0.976	1.01	0.988	1.036	0.966	1.052	1.057	0.0799754	0.014756
428787	NP_001026711.1	ubiquitin-conjugating enzyme E2 K [Gallus gallus]	22.434	44	8	8	8	1	0.938	0.999	0.93	1.111	1.003	0.923	-0.115597	0.136142
428806	NP_001026712.2	T-complex protein 1 subunit eta [Gallus gallus]	59.458	55.3	29	56	29	0.968	1.023	0.939	1.032	0.978	1.044	1.074	0.102994	0.0061446
428864	NP_001026719.2	lysosomal acid phosphatase precursor [Gallus gallus]	48.193	11.6	4	4	4	1.039	0.864	1.04	1.048	1.054	0.958	0.916	-0.12658	0.24636
428878	NP_001026720.2	gephyrin [Gallus gallus]	79.714	6.5	4	4	4	1.003	1.011	0.978	1.067	0.997	0.96	1.02	0.0285692	0.57684
428969	NP_001026727.1	phosphoglycerate mutase 1 [Gallus gallus]	28.898	48.8	11	46	11	1.038	0.908	0.991	0.989	1.102	1.012	0.929	-0.106249	0.177564
429007	NP_001026728.2	MOB-like protein phocein [Gallus gallus]	26.055	25.8	4	6	4	0.937	1.111	1.001	1.066	0.97	0.998	1.092	0.126973	0.075704
429075	NP_001026732.1	actin-related protein 2/3 complex subunit 5 [Gallus gallus]	16.452	48.3	7	17	7	1.051	0.994	0.99	0.975	1.029	0.967	0.956	-0.0649175	0.083082
429089	NP_001026734.1	protein CYR61 precursor [Gallus gallus]	40.651	20.5	8	9	8	1.079	0.868	1.228	0.846	1.177	0.828	0.73	-0.454032	0.00148162
429100	NP_001026735.1	UMP-CMP kinase [Gallus gallus]	22.172	42.9	8	16	8	1.04	0.878	1.005	0.913	1.075	1.002	0.895	-0.16004	0.062761
429118	NP_001026737.1	lariat debranching enzyme [Gallus gallus]	60.776	11.9	5	5	5	0.996	1.012	1.065	0.97	0.98	0.986	0.976	-0.0350469	0.44762
429466	NP_001026746.1	ralA-binding protein 1 [Gallus gallus]	66.161	2.8	2	2	2	0.974	1.026	1	0.905	1.138	0.974	0.933	-0.100051	0.32378
430115	NP_001026753.1	proteasome inhibitor PI31 subunit [Gallus gallus]	29.142	17	4	5	4	0.989	0.944	0.969	1.126	0.895	1.088	1.107	0.146655	0.183184
430210	NP_001026754.1	NADH dehydrogenase [ubiquinone] flavoprotein 1, mitochondrial [Gallus gallus]	50.099	37	15	23	15	0.979	1.042	0.984	1.049	0.961	1	1.057	0.0799754	0.028917
430350	NP_001026757.1	CDK5 regulatory subunit-associated protein 3 [Gallus gallus]	57.139	27.8	13	19	13	0.986	1.027	0.976	1.026	0.981	1.018	1.043	0.0607392	0.00046201
430442	NP_001026759.1	6-phosphogluconolactonase [Gallus gallus]	26.213	36.4	6	8	6	1.069	0.934	1.109	0.931	1.011	0.964	0.887	-0.172994	0.0149035
430581	NP_001026760.1	GRIP and coiled-coil domain-containing protein 1 [Gallus gallus]	88.059	14.3	9	9	9	1.049	1.004	0.998	0.996	0.985	0.989	0.986	-0.0203404	0.51768
430689	NP_001026763.1	protein pelota homolog [Gallus gallus]	43.507	15.6	6	7	6	0.931	0.947	1.07	1.045	0.971	1.04	1.02	0.0285692	0.7122
430741	NP_001026764.1	vacuolar protein sorting-associated protein 45 [Gallus gallus]	42.848	27.3	11	12	11	1	0.956	1.012	1.047	1.012	0.995	0.991	-0.013043	0.75978
430917	NP_001026767.1	COP9 signalosome complex subunit 2 [Gallus gallus]	51.695	22.6	9	16	9	0.998	1.016	0.981	1.038	1.004	0.981	1.017	0.0243197	0.39374
431043	NP_001026769.1	tubulin beta-4 chain [Gallus gallus]	50.42	31.2	13	62	1	0.993	0.932	1.061	0.954	1.094	0.98	0.91	-0.136062	0.043725
431056	NP_001026770.1	isocitrate dehydrogenase [NADP], mitochondrial [Gallus gallus]	50.469	47.3	22	48	22	0.986	0.994	1.055	1	0.987	0.998	0.988	-0.0174171	0.6605
431184	NP_001026773.1	RNA N6-adenosine-methyltransferase METTL16 [Gallus gallus]	63.386	3.2	2	3	2
431261	NP_001026775.2	S-methyl-5'-thioadenosine phosphorylase [Gallus gallus]	30.848	22.5	4	4	4	1.042	0.959	1.009	1.05	0.895	1.047	1.037	0.0524159	0.52878
431670	NP_001026784.1	death-associated protein kinase 1 isoform 2 [Gallus gallus]	109.09	1.8	1	1	1
424741	NP_001026943.1	EF-hand domain-containing protein D1 [Gallus gallus]	26.926	37.8	9	14	8	1.056	0.887	1.085	0.884	1.207	0.886	0.794	-0.332789	0.030195
416962	NP_001027533.1	developmentally-regulated GTP-binding protein 1 [Gallus gallus]	40.46	23.7	8	11	8	0.952	1.008	0.939	1.005	1.012	1.089	1.069	0.0962619	0.131184
421999	NP_001028817.1	bifunctional epoxide hydrolase 2 [Gallus gallus]	63.249	19.2	9	10	9	0.885	1.039	0.897	1.15	0.944	1.077	1.198	0.260628	0.0071837
423187	NP_001029043.2	ADP-ribosylation factor GTPase-activating protein 2 [Gallus gallus]	57.362	19.8	9	11	9	0.936	1.01	1.008	0.93	1.014	1.044	1.009	0.0129262	0.85728
417048	NP_001029988.2	tapasin isoform 1 precursor [Gallus gallus]	45.516	10	4	4	4	0.857	1.079	0.893	1.137	0.884	1.125	1.268	0.342555	0.0002997
429688	NP_001029999.1	5'-AMP-activated protein kinase subunit gamma-1 [Gallus gallus]	31.329	18.8	5	8	3	1.011	0.898	1.081	1.067	0.983	0.972	0.955	-0.0664274	0.45246
619530	NP_001030000.1	exosome complex component RRP45 [Gallus gallus]	49.374	20.2	6	8	6	1.021	0.889	1.004	0.907	1.061	0.99	0.903	-0.147202	0.048958
554283	NP_001032253.1	mortality factor 4-like protein 1 isoform 2 [Gallus gallus]	37.217	3.1	1	1	1
424192	NP_001032925.1	lymphocyte antigen 75 precursor [Gallus gallus]	199.59	10.6	18	21	18	1.015	0.869	1.099	0.923	1.129	0.924	0.837	-0.2567	0.009519
424315	NP_001032926.2	tumor necrosis factor-inducible gene 6 protein precursor [Gallus gallus]	30.751	40.7	9	17	9	0.567	1.46	0.48	1.586	0.471	1.431	2.949	1.56023	8.2201e-05
395514	NP_001033585.1	eukaryotic translation initiation factor 5B [Gallus gallus]	137.75	24.5	27	33	27	1.006	0.991	1	0.982	1.001	0.978	0.981	-0.027675	0.0121164
424691	NP_001033782.2	phosphoglucomutase-1 [Gallus gallus]	61.548	42	20	34	20	1.014	0.926	0.995	0.968	1.102	1.019	0.936	-0.0954196	0.192164
374058	NP_001034343.2	integrin beta-1 precursor [Gallus gallus]	88.618	30.1	25	51	25	0.999	1.005	1.016	0.979	0.995	0.99	0.988	-0.0174171	0.29176
769489	NP_001034344.1	SWI/SNF-related matrix-associated actin-dependent regulator of chromatin subfamily B member 1 [Gallus gallus]	44.495	16.1	6	8	6	0.966	1.054	1.016	1.041	0.925	0.98	1.058	0.0813396	0.184479
415467	NP_001034345.2	elongation factor-like GTPase 1 [Gallus gallus]	126.62	13.6	14	16	14	0.908	0.97	0.95	1.097	0.98	1.065	1.104	0.14274	0.086483
416416	NP_001034352.2	ribosomal L1 domain-containing protein 1 [Gallus gallus]	49.601	35	15	18	15	1.031	1.093	1.021	0.936	0.921	0.934	0.997	-0.00433459	0.9428
417029	NP_001034357.2	probable RNA-binding protein 19 [Gallus gallus]	107.87	7.9	6	8	6	0.961	1.086	0.997	1.007	0.98	0.981	1.046	0.0648829	0.24078
417844	NP_001034360.2	cleavage and polyadenylation specificity factor subunit 6 [Gallus gallus]	59.173	25	12	16	12	0.978	1.016	1.001	0.987	0.996	1.007	1.012	0.0172093	0.35236
419713	NP_001034366.1	signal recognition particle receptor subunit alpha [Gallus gallus]	71.196	35.7	23	31	23	0.916	1.054	0.948	1.063	0.927	1.077	1.144	0.194087	0.00034031
420489	NP_001034370.2	abl interactor 1 [Gallus gallus]	54.99	17.1	8	10	5	1.002	1.034	0.966	0.992	1.034	0.983	1.002	0.00288251	0.92622
421587	NP_001034376.2	acetyl-CoA acetyltransferase, cytosolic [Gallus gallus]	40.886	28.4	7	15	7	0.967	0.921	0.915	0.985	1.143	0.971	0.951	-0.0724828	0.54632
421702	NP_001034377.1	pantetheinase precursor [Gallus gallus]	55.399	19.4	8	12	8	0.646	1.363	0.568	1.477	0.579	1.331	2.326	1.21785	7.8793e-05
421832	NP_001034378.1	sorting nexin-14 [Gallus gallus]	108.96	4.7	4	4	4
421909	NP_001034380.1	low molecular weight phosphotyrosine protein phosphatase [Gallus gallus]	18.196	50.6	8	11	1	1.041	0.939	0.879	1.099	1.069	0.991	1.013	0.0186342	0.85618
422021	NP_001034382.1	elongator complex protein 3 [Gallus gallus]	62.091	10.3	4	4	4	1	1.097	0.918	1.002	0.949	1.04	1.095	0.130931	0.066681
422038	NP_001034383.1	squalene synthase [Gallus gallus]	48.012	8.9	3	4	3	0.948	1.285	1.067	0.874	0.958	0.882	1.023	0.0328061	0.95856
422249	NP_001034385.1	transmembrane 9 superfamily member 2-like precursor [Gallus gallus]	74.082	6.2	3	4	2	0.943	1.066	0.964	1.076	0.952	1.008	1.102	0.140124	0.0106554
423336	NP_001034391.1	gem-associated protein 2 [Gallus gallus]	30.206	4.9	1	1	1	1.021	1.118	0.877	1.032	0.966	0.999	1.1	0.137504	0.160341
424064	NP_001034395.2	UPF0565 protein C2orf69 homolog precursor [Gallus gallus]	41.97	3.4	1	1	1	0.77	1.019	0.847	1.049	1.14	1.179	1.178	0.23634	0.23608
426579	NP_001034400.1	COP9 signalosome complex subunit 5 [Gallus gallus]	37.865	44.7	12	17	12	0.98	1.049	0.974	0.993	1.01	0.993	1.024	0.0342157	0.33556
427284	NP_001034402.1	clathrin light chain A [Gallus gallus]	23.76	33.5	8	13	6	1.009	0.984	0.997	1.013	1.018	0.968	0.98	-0.0291463	0.2455
427823	NP_001034405.1	beta-glucuronidase precursor [Gallus gallus]	74.568	20.7	13	19	13	1.011	0.992	1.057	0.956	1.033	1.011	0.954	-0.0679388	0.08736
429062	NP_001034418.1	peroxiredoxin-6 [Gallus gallus]	24.976	59.8	16	33	16	0.952	0.931	0.933	1.046	1.049	1.068	1.038	0.0538064	0.5483
429208	NP_001034419.1	dnaJ homolog subfamily C member 16 precursor [Gallus gallus]	89.413	2.8	2	2	2	0.993	1.048	1.07	1.009	0.959	0.933	0.989	-0.0159576	0.83038
430767	NP_001034420.2	pre-mRNA-processing factor 19 [Gallus gallus]	55.079	27.8	10	21	10	0.989	1.046	0.985	1.016	0.947	0.982	1.042	0.0593553	0.147097
431053	NP_001034421.1	probable 18S rRNA (guanine-N(7))-methyltransferase [Gallus gallus]	31.5	11.7	2	2	2
420384	NP_001034542.1	aquaporin-1 [Gallus gallus]	28.496	10	2	3	2	1.065	0.91	1.157	0.842	1.151	0.89	0.783	-0.352916	0.0023165
419368	NP_001034578.1	vesicle-associated membrane protein 3 [Gallus gallus]	11.687	38.5	4	7	3	1.043	0.739	0.995	1.068	1.136	1.035	0.895	-0.16004	0.38016
421061	NP_001034688.1	collectin-12 [Gallus gallus]	81.836	8.9	7	7	7	1.058	0.898	1.118	0.921	1.135	0.87	0.812	-0.300448	0.00152225
426008	NP_001034691.1	long-chain fatty acid transport protein 1 [Gallus gallus]	72.598	3.7	2	2	2	0.775	1.212	0.984	1.143	0.8	1.082	1.343	0.425459	0.021445
427185	NP_001034692.1	5'-AMP-activated protein kinase catalytic subunit alpha-1 [Gallus gallus]	64.098	18.4	7	9	7	0.987	0.985	0.922	1.071	1.045	1.005	1.036	0.051024	0.45746
416359	NP_001035000.1	beta-1,4-galactosyltransferase 7 [Gallus gallus]	36.171	2.5	1	1	1	0.919	1.13	1.078	0.96	0.965	0.957	1.029	0.041243	0.72354
426561	NP_001035002.1	28S ribosomal protein S26, mitochondrial [Gallus gallus]	33.243	17.1	6	7	6	0.992	1.034	1.027	1.02	0.975	0.981	1.014	0.0200577	0.56948
419882	NP_001035107.1	olfactomedin-like protein 3 precursor [Gallus gallus]	44.846	2.3	1	1	1	0.963	1.234	1.076	0.95	0.971	0.827	1	0	0.92452
416812	NP_001035209.1	BRI3-binding protein precursor [Gallus gallus]	26.713	15.6	3	6	3	0.983	0.96	1.008	0.975	0.974	1.035	1.002	0.00288251	0.96236
417634	NP_001035503.1	peptidyl-tRNA hydrolase 2, mitochondrial [Gallus gallus]	18.29	34.5	4	4	4	1.029	0.984	0.997	1.037	1.005	0.959	0.983	-0.0247367	0.52272
423437	NP_001035555.1	endoribonuclease Dicer [Gallus gallus]	218.61	2	3	3	3
417954	NP_001035732.1	histone H1.01 [Gallus gallus]	22.044	28.3	7	24	1
395905	NP_001036814.1	eukaryotic translation initiation factor 4 gamma 2 isoform 2 [Gallus gallus]	97.561	29.7	23	35	23	0.989	1.027	0.912	1.041	0.973	1.075	1.094	0.129613	0.033341
415609	NP_001038099.1	WD repeat-containing protein 36 [Gallus gallus]	98.286	7.9	6	7	6	0.983	1.033	1.007	0.957	0.973	1.009	1.012	0.0172093	0.66224
419063	NP_001038105.1	ras-related protein Rab-6A [Gallus gallus]	23.49	55.3	11	30	11	1.046	0.951	1.048	0.98	1.024	0.988	0.936	-0.0954196	0.0086991
419580	NP_001038108.1	sodium/hydrogen exchanger 1 precursor [Gallus gallus]	89.507	4.7	3	3	3	0.956	1.058	1.027	0.956	0.99	1.019	1.02	0.0285692	0.61714
693249	NP_001038137.1	calpain-1 catalytic subunit [Gallus gallus]	81.41	23.5	14	21	13	0.984	0.954	1.036	0.959	1.092	0.969	0.926	-0.110916	0.129965
723780	NP_001038155.1	histone chaperone ASF1 [Gallus gallus]	22.968	12.7	2	2	2	0.942	1.033	0.919	1.069	0.948	1.092	1.137	0.185232	0.0023844
417159	NP_001039295.1	mediator of RNA polymerase II transcription subunit 22 [Gallus gallus]	16.45	27.1	3	3	3	0.903	0.974	1.241	1.105	0.876	0.91	0.99	-0.0144996	0.9954
420519	NP_001041541.2	vimentin [Gallus gallus]	53.215	84.6	53	508	47	1.068	0.951	1.085	0.931	1.063	0.925	0.873	-0.195946	0.000199167
420548	NP_001041542.1	lanosterol 14-alpha demethylase [Gallus gallus]	53.799	24.2	10	20	10	1.04	0.993	1.089	0.916	1.075	0.943	0.89	-0.168123	0.0128774
415651	NP_001070700.1	fractalkine precursor [Gallus gallus]	46.434	5.2	2	2	2	0.9	1.108	0.921	1.128	0.896	1.052	1.21	0.275007	0.00108254
417715	NP_001072945.1	prestin [Gallus gallus]	81.112	2.6	1	1	1	0.96	1.1	0.998	1.002	0.944	1.002	1.07	0.0976108	0.131465
421085	NP_001072947.1	protein SSXT isoform 2 [Gallus gallus]	38.402	5.1	1	3	1
423298	NP_001072949.1	actin, alpha cardiac muscle 1 [Gallus gallus]	42.019	62.6	21	396	0
427176	NP_001072951.1	metaxin-3 [Gallus gallus]	27.817	6.1	1	1	1	0.858	0.989	1.088	1.104	0.907	1.055	1.103	0.141433	0.26124
768675	NP_001072953.1	non-histone chromosomal protein HMG-17 [Gallus gallus]	9.4526	46.7	5	5	4	0.944	1.07	1.047	1.033	0.844	0.947	1.076	0.105678	0.3529
769547	NP_001072958.1	RNA-binding protein PNO1 [Gallus gallus]	26.425	21.5	4	4	4	0.965	1.038	0.996	1.033	0.997	0.984	1.033	0.0468403	0.186362
769677	NP_001072959.1	flap endonuclease 1 [Gallus gallus]	42.983	29.1	7	9	7	1.072	1.056	0.939	0.943	1.066	1.028	0.984	-0.0232698	0.7899
769981	NP_001072961.1	60S ribosomal protein L37a [Gallus gallus]	10.247	58.7	6	12	6	1.021	1.041	1.009	1.048	0.968	0.979	1.023	0.0328061	0.44514
770553	NP_001072966.1	small ubiquitin-related modifier 3 precursor [Gallus gallus]	10.711	26.6	3	6	2
770561	NP_001072967.1	coatomer subunit delta [Gallus gallus]	57.17	44.5	28	49	28	1.022	1.017	0.98	1.006	0.986	1.014	1.016	0.0229004	0.29014
771226	NP_001072971.1	YEATS domain-containing protein 4 [Gallus gallus]	26.46	9.3	2	2	2	0.985	1.005	0.983	1.081	0.904	1.046	1.091	0.125651	0.069138
396243	NP_001073182.2	collagen alpha-2(I) chain precursor [Gallus gallus]	128.92	74.2	70	166	66	1.098	0.99	1.016	0.951	1.02	0.921	0.913	-0.131313	0.050638
417407	NP_001073187.2	cytokine receptor-like factor 3 [Gallus gallus]	49.676	7.3	3	4	3	0.951	0.975	1.026	1.028	1.03	1.001	0.999	-0.00144342	0.986
768550	NP_001073205.1	uncharacterized protein C20orf24 homolog [Gallus gallus]	15.275	14.8	1	2	1	1.044	0.96	0.958	1.189	0.788	1.062	1.151	0.202888	0.23842
769534	NP_001073212.1	WD repeat-containing protein 92 [Gallus gallus]	22.577	3.5	1	1	1	1.097	0.92	0.852	1.138	0.928	1.072	1.088	0.121679	0.4283
769855	NP_001073214.1	inactive ubiquitin thioesterase FAM105A [Gallus gallus]	37.388	5.1	1	1	1
770339	NP_001073222.1	tumor protein D52 [Gallus gallus]	19.86	71.2	10	19	10	0.966	1.008	0.979	0.997	1.004	1.04	1.033	0.0468403	0.132379
771038	NP_001073225.1	sorting nexin-6 [Gallus gallus]	46.609	50.2	21	31	21	1.047	0.948	1.002	0.992	1.016	1.006	0.961	-0.0573917	0.146738
772041	NP_001073229.1	BRCA1-associated protein [Gallus gallus]	63.401	5.4	2	2	2
772354	NP_001073233.1	serine/threonine-protein phosphatase 6 catalytic subunit [Gallus gallus]	35.158	30.2	7	11	7	0.961	1.035	1.024	1.037	0.959	0.997	1.042	0.0593553	0.169716
395272	NP_001073586.1	clathrin heavy chain 1 [Gallus gallus]	191.61	43.9	65	158	40	0.978	0.996	0.994	1.004	1.016	1.009	1.007	0.0100637	0.57528
770302	NP_001073681.1	ubiquitin carboxyl-terminal hydrolase isozyme L1 [Gallus gallus]	25.11	11.2	3	4	3	1.199	0.822	1.097	0.745	1.272	0.871	0.683	-0.550043	0.0037014
769516	NP_001074185.1	tyrosine-protein kinase transmembrane receptor ROR2 precursor [Gallus gallus]	104.6	4.2	4	4	3	0.886	1.105	0.996	1.095	0.93	0.998	1.137	0.185232	0.052036
770764	NP_001074187.1	MARCKS-related protein [Gallus gallus]	21.218	20.2	3	5	3	0.431	1.571	0.444	1.639	0.421	1.533	3.66	1.87184	4.0395e-07
417255	NP_001074329.2	tubulin beta-3 chain [Gallus gallus]	49.86	61.1	20	141	2	0.994	0.963	0.982	1.045	1.033	1.051	1.017	0.0243197	0.64588
420538	NP_001074334.1	sorcin [Gallus gallus]	21.879	47.5	8	15	8	1.004	0.945	0.997	0.979	1.083	1.015	0.953	-0.0694519	0.22704
770068	NP_001074345.1	endonuclease 8-like 1 [Gallus gallus]	40.466	6.6	1	1	1	1.028	0.884	1.071	1.017	0.936	1.065	0.977	-0.0335695	0.73948
771557	NP_001074356.1	endoglin precursor [Gallus gallus]	70.824	4.3	2	2	2	0.888	1.171	0.957	1.142	0.744	1.091	1.315	0.395063	0.022798
417934	NP_001074963.1	ADP-ribosylation factor-like protein 1 [Gallus gallus]	20.369	44.2	6	12	6	1.028	0.96	0.977	1.002	1.025	1.02	0.984	-0.0232698	0.54744
772313	NP_001074974.1	39S ribosomal protein L37, mitochondrial [Gallus gallus]	49.89	24.1	9	11	9	0.962	0.97	1.031	1.056	0.955	1.032	1.037	0.0524159	0.35718
427896	NP_001075172.1	histone H1.11R [Gallus gallus]	21.803	32.4	8	26	2	1.086	0.878	1.053	1.089	0.948	0.934	0.94	-0.0892673	0.4436
428927	NP_001075174.1	ADP-ribosylation factor 6 [Gallus gallus]	20.096	32.6	5	11	5	1.051	0.969	0.974	0.961	1.025	0.974	0.952	-0.0709665	0.099417
422477	NP_001075886.1	40S ribosomal protein S3a [Gallus gallus]	29.867	62.5	22	55	22	0.996	1.057	0.948	1.027	0.95	1.033	1.077	0.107018	0.015444
422166	NP_001076829.1	tumor necrosis factor receptor superfamily member 27 [Gallus gallus]	54.43	13.7	5	6	5	1.168	0.846	1.1	0.858	1.145	0.904	0.764	-0.388355	0.00055637
423581	NP_001090997.1	guanine nucleotide-binding protein G(I)/G(S)/G(O) subunit gamma-2 [Gallus gallus]	7.8781	42.3	2	3	2	0.949	0.946	1.042	1.016	0.986	1.008	0.998	-0.00288828	0.95494
769146	NP_001091003.1	ATP synthase subunit e, mitochondrial [Gallus gallus]	8.3387	52.1	4	13	4	0.972	0.953	1.066	1.018	0.98	1.053	1.002	0.00288251	0.96376
770243	NP_001091005.1	signal recognition particle 9 kDa protein [Gallus gallus]	10.08	50	5	6	5	0.993	0.966	0.993	1.003	1.058	0.953	0.96	-0.0588937	0.193861
770592	NP_001091007.1	metallothionein-3 [Gallus gallus]	6.2775	19	1	1	1
417753	NP_001091106.1	NADH dehydrogenase [ubiquinone] 1 alpha subcomplex subunit 5 [Gallus gallus]	13.448	50	5	8	5	0.969	0.994	1.031	1.03	0.96	0.998	1.021	0.0299829	0.44702
417702	NP_001091114.1	B-cell receptor-associated protein 29 [Gallus gallus]	27.765	45.3	13	31	13	0.986	1.033	0.97	1.062	0.966	1.031	1.07	0.0976108	0.0041365
416077	NP_001091708.2	THO complex subunit 7 homolog [Gallus gallus]	23.855	8.8	2	2	2	1.003	1.046	0.968	0.987	1.032	0.978	1.003	0.00432161	0.9317
417050	NP_001092823.1	B locus M alpha chain 1 precursor [Gallus gallus]	28.373	2.7	1	1	1	1.072	1.107	1.055	0.889	1.021	0.874	0.912	-0.132894	0.27364
425772	NP_001092824.1	zinc finger protein RFP [Gallus gallus]	56.542	13.7	6	9	6	0.999	1.109	1.001	1.057	0.881	0.962	1.086	0.119024	0.2382
396206	NP_001095200.1	neurofilament medium polypeptide [Gallus gallus]	95.834	2.9	3	31	1	0.95	0.993	1.098	1.002	0.969	0.995	0.991	-0.013043	0.89292
421804	NP_001096671.1	E3 UFM1-protein ligase 1 [Gallus gallus]	89.261	22.7	16	24	15	0.97	1.009	1.012	1.009	0.999	1.022	1.02	0.0285692	0.21054
373996	NP_001099134.1	caveolin-1 [Gallus gallus]	20.446	41	6	20	6	0.968	1.031	1.037	0.916	0.964	1.042	1.007	0.0100637	0.9121
422363	NP_001099145.1	malignant T-cell-amplified sequence 1 [Gallus gallus]	20.571	38.1	5	5	5	0.917	1.147	0.884	0.965	1.135	0.972	1.05	0.0703893	0.6166
423463	NP_001103255.1	heat shock protein HSP 90-alpha [Gallus gallus]	84.058	51.5	39	143	29	0.981	1.046	0.914	1.04	0.948	1.081	1.114	0.155749	0.010318
421398	NP_001103529.2	thyroid adenoma-associated protein homolog [Gallus gallus]	216.59	1.3	2	2	2
421879	NP_001103530.1	ras-related protein Rab-23 [Gallus gallus]	26.792	35.4	7	10	2	1.14	0.801	1.204	0.841	1.171	0.866	0.714	-0.486004	0.00025946
396523	NP_001103834.1	neo-calmodulin [Gallus gallus]	16.867	47.7	8	41	0
100134845	NP_001106277.1	cyclin-dependent kinases regulatory subunit 1 [Gallus gallus]	9.645	20.3	1	1	1
415813	NP_001106280.1	heat shock factor-binding protein 1 [Gallus gallus]	8.5585	58.4	4	5	4	1.007	0.889	1.047	1.007	1.077	1.06	0.944	-0.0831412	0.3436
425396	NP_001106924.1	neuropathy target esterase [Gallus gallus]	147.84	1.5	2	2	1
770790	NP_001106925.1	protein kish-A precursor [Gallus gallus]	8.0037	12.5	1	2	1
418931	NP_001107043.1	transcription factor IIIA [Gallus gallus]	41.279	5.9	2	2	2
772264	NP_001107213.1	serine/arginine-rich splicing factor 1 [Gallus gallus]	27.791	52	14	39	14	0.988	1.009	1.006	1.001	0.976	1.013	1.018	0.0257376	0.133983
430371	NP_001107216.1	synaptobrevin homolog YKT6 [Gallus gallus]	22.423	43.9	8	12	8	1.056	0.887	0.986	0.921	1.173	0.999	0.873	-0.195946	0.09418
416037	NP_001107231.1	mitochondrial intermembrane space import and assembly protein 40 [Gallus gallus]	15.464	35.5	5	6	5	0.921	1.015	1.003	1.03	0.868	1.064	1.114	0.155749	0.069078
423830	NP_001107598.1	cytochrome c oxidase assembly protein COX15 homolog [Gallus gallus]	42.838	12.5	4	5	4	0.886	1.124	0.91	0.995	1.07	1.027	1.098	0.134878	0.2409
770172	NP_001108101.1	39S ribosomal protein L38, mitochondrial [Gallus gallus]	44.401	14.8	4	5	4	1.075	0.966	1.11	1.007	0.925	0.982	0.95	-0.0740006	0.44924
419587	NP_001108444.1	selenoprotein N precursor [Gallus gallus]	59.745	4.9	3	3	3	1.07	0.907	1.09	0.873	1.115	0.96	0.837	-0.2567	0.0039964
417745	NP_001108489.3	selenoprotein O [Gallus gallus]	75.124	2.2	1	1	1	1.062	0.934	1.013	0.982	1.063	0.962	0.917	-0.125006	0.0159804
416782	NP_001116163.2	thioredoxin reductase 2, mitochondrial precursor [Gallus gallus]	55.791	1.6	1	1	1
427186	NP_001116235.1	60S ribosomal protein L37 [Gallus gallus]	11.07	23.7	3	4	3	1	0.939	0.954	1.012	0.933	1.092	1.054	0.0758749	0.34786
416031	NP_001116249.1	thioredoxin reductase 3 [Gallus gallus]	66.607	33.8	16	23	16	0.993	0.98	0.991	0.973	1.029	1.027	0.989	-0.0159576	0.62168
421685	NP_001123859.1	interferon gamma receptor 1 precursor [Gallus gallus]	48.414	2.5	1	1	1	0.88	1.135	0.937	1.083	0.892	1.074	1.215	0.280956	0.0016164
419110	NP_001124213.1	inter-alpha-trypsin inhibitor heavy chain H2 precursor [Gallus gallus]	106.77	6.5	6	5	5	0.844	1.048	0.882	1.14	0.972	1.117	1.225	0.292782	0.0139164
374034	NP_001128120.1	actin filament-associated protein 1 isoform b [Gallus gallus]	81.159	5.9	4	6	4	1.073	0.981	1.073	0.931	1.084	0.879	0.864	-0.210897	0.043925
100190948	NP_001129258.1	cyclin-dependent-like kinase 5 [Gallus gallus]	33.339	27.7	8	9	6	0.995	0.945	1.014	0.997	1.008	1	0.975	-0.0365259	0.25534
427121	NP_001131122.1	calpastatin [Gallus gallus]	81.444	34.9	19	41	19	1.023	1.006	0.991	1.022	0.992	0.985	1.002	0.00288251	0.88398
776864	NP_001131123.1	protein LSM12 homolog [Gallus gallus]	21.519	11.3	2	3	2	1.034	1.006	1.066	0.994	0.961	0.951	0.964	-0.0528949	0.36488
100216000	NP_001135728.1	calponin-2 [Gallus gallus]	33.39	47.9	12	28	11	1.002	0.988	0.966	1	1.037	1.011	0.998	-0.00288828	0.9435
100216364	NP_001135862.1	26S proteasome non-ATPase regulatory subunit 4 [Gallus gallus]	40.533	44.9	13	22	13	0.975	1.045	0.961	1.056	0.956	0.982	1.066	0.0922074	0.053556
429983	NP_001135912.2	phosphatidylinositol 4-phosphate 5-kinase type-1 alpha [Gallus gallus]	65.117	4.6	3	3	3	0.947	1.004	1.052	1.022	0.983	1	1.015	0.0214797	0.6473
420513	NP_001137441.1	ADP-ribosylation factor-like protein 5B [Gallus gallus]	20.287	4.5	1	1	1	1.041	1.077	0.958	0.994	0.971	0.971	1.024	0.0342157	0.59164
421002	NP_001152842.1	F-actin-uncapping protein LRRC16A [Gallus gallus]	145.94	13.4	13	16	13	1.037	0.935	1.08	0.94	1.095	1.005	0.897	-0.15682	0.0182759
424406	NP_001153543.2	uridine-cytidine kinase 2 [Gallus gallus]	29.409	14.9	2	2	2	0.97	1.022	1.007	1.02	0.948	1.038	1.053	0.0745054	0.048098
424643	NP_001156717.1	glutathione peroxidase 7 [Gallus gallus]	23.541	51.4	9	25	9	1.022	1.042	0.969	1.008	0.949	0.961	1.024	0.0342157	0.50114
418784	NP_001156846.1	muscleblind-like protein 2 isoform 5 [Gallus gallus]	38.247	11.3	5	10	0
772206	NP_001157812.1	single-pass membrane and coiled-coil domain-containing protein 4 [Gallus gallus]	6.767	13.6	1	2	1	0.856	0.899	1.107	1.014	1.121	1.015	0.949	-0.07552	0.65888
418822	NP_001157822.1	mitotic-spindle organizing protein 1 [Gallus gallus]	7.814	22.2	1	1	1	1.133	0.918	0.903	1.024	1.223	0.836	0.852	-0.231075	0.22558
419653	NP_001157867.1	eukaryotic translation initiation factor 3 subunit I [Gallus gallus]	36.489	60.9	16	29	16	1.003	1.048	0.941	0.999	0.958	1.024	1.058	0.0813396	0.073077
768420	NP_001159797.1	coactosin-like protein [Gallus gallus]	16.106	33.8	5	6	5	1.014	0.868	1.032	0.966	1.092	1.013	0.907	-0.140826	0.123764
776282	NP_001159798.1	peptidyl-prolyl cis-trans isomerase A [Gallus gallus]	17.81	64.2	11	67	11	1.025	0.858	0.995	0.907	1.164	1.026	0.877	-0.189351	0.137976
396451	NP_001161191.1	prostaglandin G/H synthase 2 isoform 1 precursor [Gallus gallus]	69.112	31.3	17	22	17	0.67	1.254	0.654	1.438	0.625	1.384	2.091	1.06419	8.2936e-05
396500	NP_001161198.1	proto-oncogene c-Rel [Gallus gallus]	66.904	22.1	10	13	9	0.794	1.224	0.764	1.273	0.7	1.223	1.647	0.719841	0.00022235
396547	NP_001161200.1	alpha-N-acetylgalactosaminidase precursor [Gallus gallus]	47.4	32.5	14	22	14	1.047	0.944	1.071	0.953	1.074	0.954	0.893	-0.163268	0.00020303
416367	NP_001161201.1	tubulin-specific chaperone A [Gallus gallus]	12.707	34.3	6	7	6	0.974	0.982	1.005	0.975	1.04	0.995	0.978	-0.0320936	0.32746
418049	NP_001161203.1	thiosulfate sulfurtransferase [Gallus gallus]	32.886	28.6	7	12	7	0.997	1.036	1.031	1.029	0.991	0.988	1.011	0.015783	0.59422
420037	NP_001161207.1	eukaryotic translation initiation factor 1 [Gallus gallus]	12.733	61.9	7	11	7	0.988	0.996	0.978	1.02	0.887	1.068	1.081	0.112367	0.12096
420668	NP_001161209.1	cytoplasmic dynein 1 light intermediate chain 1 [Gallus gallus]	55.893	38.4	14	19	14	0.941	1.024	1.043	1.013	1.019	0.985	1.006	0.00863031	0.8405
421791	NP_001161237.1	cyclin-C [Gallus gallus]	33.258	6	1	1	1	0.81	0.965	1.051	1.165	0.977	1.04	1.117	0.159629	0.29788
425542	NP_001161480.1	dolichyl-diphosphooligosaccharide--protein glycosyltransferase 48 kDa subunit [Gallus gallus]	48.765	32.7	12	25	12	0.938	0.988	1.023	1.065	0.96	0.99	1.042	0.0593553	0.3162
427466	NP_001161481.1	cathepsin L1 precursor [Gallus gallus]	40.175	30.9	10	16	9	0.927	1.029	1.036	1.031	0.905	1.065	1.09	0.124328	0.112397
415410	NP_001162176.1	ras-related protein Rab-27A [Gallus gallus]	25.066	23.1	4	8	4	0.97	0.99	1.06	1.028	1.003	1.001	0.995	-0.00723157	0.89188
418958	NP_001164635.1	poly [ADP-ribose] polymerase 4 [Gallus gallus]	181.46	13.5	17	21	17	1.014	0.975	0.983	0.989	1.039	1.027	0.985	-0.0218044	0.54016
415899	NP_001165116.1	signal peptidase complex subunit 1 homolog [Gallus gallus]	18.922	15.7	3	4	3	0.945	1.036	0.935	1.067	0.966	1.057	1.11	0.15056	0.00127733
419134	NP_001165209.1	copine-1 [Gallus gallus]	59.721	26.6	13	18	12	1.025	0.919	1.022	0.981	1.133	0.945	0.895	-0.16004	0.046516
396418	NP_001167000.1	capping protein (actin filament) muscle Z-line, beta isoform 2 [Gallus gallus]	30.61	55.5	14	31	3	0.996	0.952	1.049	0.941	1.073	1	0.928	-0.107803	0.06068
420002	NP_001170800.2	LIM and SH3 domain protein 1 [Gallus gallus]	29.636	39.9	13	22	6	1.029	0.922	0.992	0.993	1.073	1.006	0.944	-0.0831412	0.177918
427502	NP_001171026.1	transient receptor potential cation channel subfamily M member 7 [Gallus gallus]	212.11	1.3	2	2	2
419980	NP_001171206.1	prohibitin [Gallus gallus]	29.892	48.2	12	22	12	0.924	1.039	0.971	1.087	0.917	1.054	1.131	0.177599	0.0052968
416485	NP_001171603.1	fascin [Gallus gallus]	54.171	54.5	24	42	24	0.985	0.959	0.979	1.009	1.017	1.047	1.011	0.015783	0.719
426233	NP_001180514.1	39S ribosomal protein L45, mitochondrial [Gallus gallus]	34.107	21.3	6	6	6	0.958	1.005	0.998	1.113	0.921	0.938	1.062	0.0867838	0.34674
424185	NP_001180567.1	interferon-induced helicase C domain-containing protein 1 [Gallus gallus]	114.91	8.1	9	11	9	0.97	1.01	0.948	1.055	0.98	1.014	1.062	0.0867838	0.023762
424186	NP_001180568.1	prolyl endopeptidase FAP [Gallus gallus]	87.218	33.6	27	64	27	1.075	0.978	1.059	0.884	1.061	0.926	0.873	-0.195946	0.0097774
395268	NP_001180598.1	lupus La protein [Gallus gallus]	46.388	47.8	23	41	23	1.012	1.047	0.994	0.985	0.995	0.994	1.008	0.0114956	0.70918
420335	NP_001181856.1	squalene monooxygenase [Gallus gallus]	63.889	18.3	10	11	10	1.158	0.954	1.118	0.948	0.957	0.881	0.861	-0.215915	0.082684
427444	NP_001181931.1	WD repeat-containing protein 70 isoform 1 [Gallus gallus]	71.179	13.5	6	6	6	0.92	1.054	0.982	1.055	0.98	1.018	1.085	0.117695	0.028456
427859	NP_001182398.1	zinc finger protein 277 [Gallus gallus]	51.805	3.2	1	1	1	1.007	1.067	1.104	0.909	0.979	0.943	0.945	-0.0816138	0.39248
428349	NP_001182480.1	SURP and G-patch domain-containing protein 1 [Gallus gallus]	73.595	2.9	2	2	2	0.937	1.128	0.956	1.01	0.998	0.983	1.08	0.111031	0.177925
419815	NP_001182483.1	serine/arginine-rich splicing factor 3 [Gallus gallus]	19.329	43.9	9	23	8	1.018	0.992	1.021	1.008	0.97	0.963	0.985	-0.0218044	0.51258
420113	NP_001182498.1	SURP and G-patch domain-containing protein 2 [Gallus gallus]	119.73	1.1	1	2	1
770094	NP_001184217.1	3-ketoacyl-CoA thiolase, peroxisomal [Gallus gallus]	44.607	19.9	7	9	7	1.029	1.014	1.036	0.925	1.03	0.963	0.938	-0.0923402	0.134763
426199	NP_001184255.1	V-type proton ATPase subunit H [Gallus gallus]	55.478	30.2	9	15	9	0.943	0.986	1.045	1.1	1.026	0.945	1.006	0.00863031	0.93828
395878	NP_001185530.1	poly(A) polymerase alpha [Gallus gallus]	82.897	16.7	9	10	9	0.976	1.025	0.975	0.953	1.006	1.064	1.029	0.041243	0.46468
415636	NP_001185534.1	ubiquinone biosynthesis protein COQ9, mitochondrial [Gallus gallus]	35.149	14.6	4	5	4	1.084	1.04	0.995	1	0.959	0.936	0.98	-0.0291463	0.69244
415898	NP_001185536.1	glycosyltransferase 8 domain-containing protein 1 [Gallus gallus]	42.343	24.2	8	11	8	0.998	1.043	1	0.968	0.992	0.993	1.005	0.0071955	0.86654
415936	NP_001185541.1	ER membrane protein complex subunit 3 [Gallus gallus]	30.099	32.2	7	8	7	0.977	1.03	0.954	1.058	0.936	1.004	1.078	0.108357	0.0181616
416066	NP_001185549.1	pyruvate dehydrogenase E1 component subunit beta, mitochondrial [Gallus gallus]	38.877	28.1	8	16	8	1.008	1	0.984	1	0.963	1.028	1.025	0.0356239	0.2025
416344	NP_001185566.1	protein YIPF5 [Gallus gallus]	27.759	3.5	1	2	1	1.041	1.023	0.877	0.971	1	1.091	1.057	0.0799754	0.40714
416574	NP_001185569.1	dynactin subunit 5 isoform 2 [Gallus gallus]	20.188	13.2	3	3	3	1.05	0.997	1.031	1.03	0.954	0.95	0.981	-0.027675	0.6403
416634	NP_001185570.1	cytosolic Fe-S cluster assembly factor NUBP1 [Gallus gallus]	34.542	19.2	5	5	5	0.951	0.902	0.979	1.041	1.031	1.087	1.023	0.0328061	0.7546
416990	NP_001185571.1	phosphatidylethanolamine-binding protein 1 [Gallus gallus]	20.957	67.9	10	17	10	1.071	0.829	1.009	0.877	1.22	0.928	0.798	-0.325539	0.026199
418267	NP_001185577.1	cystatin B (stefin B) [Gallus gallus]	11.159	23.5	2	6	2	1.059	1.005	1.012	0.9	1.111	0.933	0.892	-0.164884	0.053064
418662	NP_001185580.1	CD99 antigen precursor [Gallus gallus]	18.198	21	4	10	4	1.066	0.961	1.036	0.929	1.096	0.927	0.881	-0.182786	0.0031798
419098	NP_001185581.1	enoyl-CoA hydratase domain-containing protein 3, mitochondrial [Gallus gallus]	31.213	15.5	4	5	4	0.957	0.945	0.98	1.068	1.052	1.01	1.011	0.015783	0.82234
420243	NP_001185586.1	cytochrome c oxidase subunit 6C [Gallus gallus]	8.7914	48.1	4	7	4	0.948	1.023	1.005	1.058	0.94	1.007	1.067	0.0935602	0.06266
420361	NP_001185591.1	ectonucleotide pyrophosphatase/phosphodiesterase family member 2 [Gallus gallus]	98.456	2.6	2	2	2	1.362	0.618	1.358	0.766	1.205	0.725	0.537	-0.897006	0.0012004
420273	NP_001185609.1	ER membrane protein complex subunit 2 [Gallus gallus]	34.884	39.7	10	15	10	0.946	1.014	0.968	1.138	0.916	1.045	1.13	0.176323	0.033622
374091	NP_001185639.2	protein disulfide-isomerase precursor [Gallus gallus]	57.475	57.1	32	191	32	1.015	1.01	1.013	0.981	1.005	0.984	0.981	-0.027675	0.11706
396316	NP_001185644.1	hydroxymethylglutaryl-CoA lyase, mitochondrial isoform 1 [Gallus gallus]	33.724	24.8	8	11	8	1.032	0.973	1.044	0.992	1.018	0.967	0.948	-0.077041	0.0070971
772260	NP_001185711.1	cytochrome c oxidase subunit 7A2, mitochondrial [Gallus gallus]	9.5963	27.7	2	6	2	1.004	1.017	1.019	0.995	0.995	0.973	0.989	-0.0159576	0.48732
420874	NP_001185817.1	LYR motif-containing protein 4 [Gallus gallus]	10.434	24.7	3	4	3	0.971	1.067	1.019	0.988	0.995	0.971	1.014	0.0200577	0.70682
770363	NP_001185921.1	basigin isoform 2 precursor [Gallus gallus]	29.202	35.7	8	17	8	1.001	1.051	0.957	0.973	0.968	1.02	1.04	0.0565835	0.2086
418541	NP_001186100.1	NADH dehydrogenase [ubiquinone] flavoprotein 3, mitochondrial isoform b precursor [Gallus gallus]	10.677	30.6	3	4	1
415740	NP_001186149.1	lon protease homolog 2, peroxisomal [Gallus gallus]	94.678	2.3	2	2	2	0.98	0.994	0.962	1.043	1.006	1.025	1.039	0.0551957	0.118636
769549	NP_001186159.1	NADH dehydrogenase [ubiquinone] 1 alpha subcomplex assembly factor 2 precursor [Gallus gallus]	19.845	7.6	1	1	1
418001	NP_001186179.1	E3 ubiquitin-protein ligase RBX1 [Gallus gallus]	12.274	7.4	1	1	1	1.004	0.991	1.028	0.999	1.012	0.978	0.975	-0.0365259	0.053143
416700	NP_001186249.1	exocyst complex component 4 [Gallus gallus]	111.12	8.2	7	7	7	0.989	1.022	0.98	0.993	0.979	1.034	1.034	0.0482362	0.054363
417717	NP_001186254.1	dnaJ homolog subfamily C member 2 [Gallus gallus]	71.423	16.5	7	8	7	0.914	1.024	1.055	0.984	0.988	1.051	1.034	0.0482362	0.48318
374255	NP_001186314.1	39S ribosomal protein L23, mitochondrial [Gallus gallus]	18.003	18.7	4	4	4	1.066	1.015	0.982	0.987	0.999	0.965	0.974	-0.0380063	0.41682
395778	NP_001186315.1	glycoprotein integral membrane protein 1 precursor [Gallus gallus]	36.574	2.2	1	1	1	1.075	0.92	1.093	0.957	1.041	0.931	0.875	-0.192645	0.00194366
396409	NP_001186316.1	tyrosine-protein phosphatase non-receptor type 2 [Gallus gallus]	45.43	34.1	12	17	12	0.887	1.014	0.961	1.135	0.916	1.087	1.171	0.227741	0.0174837
416706	NP_001186319.1	28S ribosomal protein S5, mitochondrial [Gallus gallus]	45.688	20.1	8	9	8	0.966	1.057	1.011	1.024	0.896	1.023	1.08	0.111031	0.100061
416711	NP_001186321.1	tubulin--tyrosine ligase [Gallus gallus]	43.495	6.9	3	3	3	0.935	1.037	1.019	1.075	0.896	1.041	1.106	0.145351	0.060682
417694	NP_001186324.1	ATP-binding cassette sub-family D member 2 [Gallus gallus]	82.228	1.6	1	1	1
416723	NP_001186330.1	DNA-directed RNA polymerase III subunit RPC6 [Gallus gallus]	35.502	7.3	2	2	2
416726	NP_001186331.1	D-aminoacyl-tRNA deacylase 1 [Gallus gallus]	23.251	3.4	1	2	1
416729	NP_001186337.1	thioredoxin-related transmembrane protein 4 precursor [Gallus gallus]	35.405	19.5	6	8	6	0.998	0.985	0.964	1.019	0.968	1.028	1.035	0.0496308	0.114862
421194	NP_001186347.2	activator of 90 kDa heat shock protein ATPase homolog 2 [Gallus gallus]	38.251	6.5	2	2	2	1.044	0.977	0.824	1.071	1.003	1.089	1.093	0.128293	0.31382
421197	NP_001186350.1	peroxisome biogenesis factor 13 [Gallus gallus]	43.638	2.5	1	1	1
421606	NP_001186351.1	probable methyltransferase-like protein 15 [Gallus gallus]	45.503	2.4	1	1	1	1.048	0.864	1.008	0.993	1.015	1.076	0.955	-0.0664274	0.48682
416679	NP_001186366.1	nuclear-interacting partner of ALK [Gallus gallus]	53.228	23.3	10	14	10	0.998	0.984	1.02	0.985	1.054	0.993	0.964	-0.0528949	0.08802
417704	NP_001186374.1	conserved oligomeric Golgi complex subunit 5 [Gallus gallus]	90.731	11.1	9	12	9	0.938	1.018	1.021	0.964	1.026	0.996	0.998	-0.00288828	0.96022
373970	NP_001186377.1	rho-associated protein kinase 1 [Gallus gallus]	158.67	14.6	18	21	13	0.988	1.026	0.946	1.105	0.954	0.993	1.082	0.1137	0.086116
421230	NP_001186379.1	zinc finger CCCH domain-containing protein 6 [Gallus gallus]	133.61	2.4	3	4	3	0.937	0.982	0.976	1.063	1.025	1.028	1.046	0.0648829	0.26328
373987	NP_001186382.1	thrombospondin-1 precursor [Gallus gallus]	129.55	24.5	26	35	26	1.042	0.971	1.125	0.821	1.167	0.899	0.807	-0.309359	0.021575
395274	NP_001186416.1	tumor necrosis factor receptor superfamily member 6 precursor [Gallus gallus]	38.425	22.1	5	5	5	1.049	1.041	0.983	0.941	0.97	1.002	0.994	-0.00868224	0.87692
422988	NP_001186422.1	NAD-dependent protein deacetylase sirtuin-3, mitochondrial [Gallus gallus]	38.636	3.2	1	1	1
417735	NP_001186426.2	cysteine-rich with EGF-like domain protein 2 precursor [Gallus gallus]	39.437	38.3	13	17	13	0.988	1.048	1.011	1.016	0.976	0.972	1.021	0.0299829	0.45588
417750	NP_001186429.2	neural Wiskott-Aldrich syndrome protein [Gallus gallus]	54.776	18.4	9	9	9	1.02	1.002	1.017	0.993	0.958	0.994	0.998	-0.00288828	0.94528
423626	NP_001186445.1	exosome complex component RRP40 [Gallus gallus]	27.797	18.8	3	4	3	1.193	0.948	1.02	0.945	1.164	0.768	0.788	-0.343732	0.047217
423000	NP_001186447.1	39S ribosomal protein L21, mitochondrial [Gallus gallus]	21.347	41.8	8	9	8	0.98	1.086	0.998	1.044	0.928	1.011	1.081	0.112367	0.060962
423628	NP_001186448.1	S-adenosylmethionine synthase [Gallus gallus]	43.752	13.9	5	5	4	1.045	1.085	0.955	0.978	0.921	1.02	1.055	0.077243	0.32112
423633	NP_001186449.1	ribosome biogenesis protein BMS1 homolog [Gallus gallus]	148.22	11.8	12	13	12	0.937	1.022	1.056	1.013	0.955	1.011	1.033	0.0468403	0.4567
423638	NP_001186453.1	protein ecdysoneless homolog [Gallus gallus]	71.593	4.1	2	2	2	1.018	1.048	0.905	1.004	1.041	0.998	1.029	0.041243	0.54764
423640	NP_001186454.1	dnaJ homolog subfamily C member 9 [Gallus gallus]	29.844	29.2	6	8	6	1.048	0.993	1.003	1.002	0.967	0.996	0.991	-0.013043	0.75258
423642	NP_001186458.1	CDGSH iron-sulfur domain-containing protein 1 [Gallus gallus]	11.864	36.1	2	5	2	0.901	1.07	1.025	1.049	1.032	1.048	1.071	0.0989585	0.25696
417812	NP_001186483.1	mitochondrial inner membrane protease ATP23 homolog [Gallus gallus]	27.532	24	5	6	5	0.905	1.077	0.972	1.087	1.028	0.948	1.071	0.0989585	0.30098
417829	NP_001186488.1	N-acetylglucosamine-6-sulfatase precursor [Gallus gallus]	60.635	15.4	8	25	8	1.087	1.008	1.008	0.957	0.976	0.956	0.951	-0.0724828	0.2465
423011	NP_001186490.1	isovaleryl-CoA dehydrogenase, mitochondrial [Gallus gallus]	45.845	11.6	5	6	5	0.975	1.05	1.037	1.043	0.962	1.009	1.043	0.0607392	0.179755
423041	NP_001186517.1	AMP deaminase 3 [Gallus gallus]	88.93	30.3	22	23	22	0.92	1.033	0.934	1.08	0.942	1.089	1.145	0.195348	0.00160003
420524	NP_001186520.1	ras suppressor protein 1 [Gallus gallus]	31.524	31	9	12	9	1.05	0.978	1.041	0.914	1.066	0.971	0.907	-0.140826	0.0121394
423081	NP_001186521.1	general transcription factor IIH subunit 1 [Gallus gallus]	62.27	4.4	2	3	2	0.964	1.006	1.023	0.922	1.011	1.075	1.002	0.00288251	0.9996
423088	NP_001186524.1	pleckstrin homology-like domain family A member 2 [Gallus gallus]	15.318	12.9	2	2	2
423663	NP_001186527.1	transmembrane protein 26 [Gallus gallus]	41.529	1.9	1	1	1	0.865	1.121	0.917	1.088	0.914	1.096	1.226	0.293959	0.00062254
423204	NP_001186581.1	abscission/NoCut checkpoint regulator [Gallus gallus]	46.928	9	3	3	3
423207	NP_001186584.1	vacuolar protein sorting-associated protein 18 homolog [Gallus gallus]	112.57	8.7	8	9	8	0.953	0.984	0.997	1.021	0.978	1.043	1.041	0.0579701	0.135361
420563	NP_001186607.1	BET1 homolog [Gallus gallus]	12.978	19.1	1	1	1
423250	NP_001186613.1	RNA-binding protein 25 [Gallus gallus]	96.878	13.6	9	11	9	1.018	1.069	0.965	0.986	0.961	0.98	1.031	0.0440443	0.42244
423255	NP_001186619.1	signal-induced proliferation-associated 1-like protein 1 [Gallus gallus]	197.53	14.2	21	27	21	1.152	0.909	1.117	0.837	1.141	0.859	0.764	-0.388355	0.00048393
423272	NP_001186633.1	arginase-2, mitochondrial [Gallus gallus]	38.794	4.2	1	1	1
423300	NP_001186641.1	RNA-binding protein Nova-1 isoform 1 [Gallus gallus]	51.741	10.8	5	5	5	1.017	1.001	1.016	0.99	1.024	0.967	0.968	-0.046921	0.034535
423307	NP_001186643.1	sec1 family domain-containing protein 1 [Gallus gallus]	71.367	36.6	18	28	18	1.051	0.999	1.044	0.986	1.006	0.948	0.946	-0.0800879	0.055264
415297	NP_001186677.1	ubiquitin-like protein 7 [Gallus gallus]	40.293	5.8	2	2	2
418880	NP_001186754.1	GDP-Man:Man(3)GlcNAc(2)-PP-Dol alpha-1,2-mannosyltransferase [Gallus gallus]	55.607	3.5	2	2	2
100529061	NP_001186777.1	ras-related protein Rab-5B [Gallus gallus]	23.614	54	9	24	6	1.042	0.943	1.092	0.916	1.04	0.947	0.884	-0.177882	0.0029751
100529062	NP_001186786.1	cyclin-dependent kinase 2 [Gallus gallus]	33.732	16.4	4	6	2	0.91	0.978	0.949	0.976	1.034	1.151	1.073	0.10165	0.35626
418022	NP_001188376.1	GTP-binding protein 1 [Gallus gallus]	72.214	21.9	11	15	11	0.999	0.936	0.969	0.963	1.076	1.013	0.957	-0.0634092	0.32066
424528	NP_001188416.2	B-cell lymphoma/leukemia 10 [Gallus gallus]	27.126	11.5	3	4	3	1.016	0.97	0.999	1.037	1.013	0.978	0.986	-0.0203404	0.53408
771417	NP_001191861.1	centromere protein S [Gallus gallus]	15.618	6.5	1	1	1
100538349	NP_001192026.1	ubiquitin-conjugating enzyme E2 variant 1 [Gallus gallus]	16.335	57.2	7	10	4	1.015	0.919	1.013	1.003	1.098	0.969	0.925	-0.112475	0.100843
100538348	NP_001192029.1	transmembrane protein 189 [Gallus gallus]	31.814	12.4	3	3	3	0.977	1.075	0.984	1.033	0.948	1.047	1.085	0.117695	0.0076836
395492	NP_001193425.1	fructose-bisphosphate aldolase C [Gallus gallus]	39.36	67.9	28	142	28	0.993	0.967	0.968	1.014	1.022	1.04	1.013	0.0186342	0.66262
418171	NP_001230519.1	aldo-keto reductase family 1, member B1-like [Gallus gallus]	35.808	42.1	13	24	1	0.936	1.05	1.127	0.93	1.006	0.96	0.958	-0.0619024	0.56014
420588	NP_001231522.1	adseverin [Gallus gallus]	80.532	2.1	2	2	2	0.999	0.938	1.05	1.104	0.991	0.934	0.979	-0.0306192	0.69958
374031	NP_001238962.1	neurogenic locus notch homolog protein 2 precursor [Gallus gallus]	262.13	9.5	20	22	20	0.922	1.072	0.974	1.032	0.914	1.012	1.109	0.149259	0.0166416
429678	NP_001238997.1	mitochondrial glutamate carrier 1 [Gallus gallus]	34.774	44.1	12	12	12	1.014	0.918	1.055	1.001	1.028	1.034	0.954	-0.0679388	0.26222
770021	NP_001239006.1	receptor expression-enhancing protein 5 [Gallus gallus]	21.484	22.2	6	13	6	1.108	0.948	1.054	0.918	1.08	0.946	0.867	-0.205896	0.00132195
418785	NP_001239028.1	UDP-glucose:glycoprotein glucosyltransferase 2 precursor [Gallus gallus]	174.36	33.6	48	65	45	0.978	1.007	1.009	1.022	0.961	1.008	1.03	0.0426443	0.117341
419467	NP_001239033.1	delta-1-pyrroline-5-carboxylate dehydrogenase, mitochondrial [Gallus gallus]	60.626	9.6	4	6	4	0.971	0.875	1.002	1.086	1.025	1.05	1.004	0.00575927	0.9982
424584	NP_001239055.1	40S ribosomal protein S8 [Gallus gallus]	24.185	48.1	9	36	9	0.962	1.06	0.983	1.049	0.926	1.024	1.091	0.125651	0.012401
416218	NP_001239073.1	H/ACA ribonucleoprotein complex subunit 2 [Gallus gallus]	16.651	40.5	5	6	5	1.006	0.982	1.03	1.033	0.993	1.003	0.996	-0.00578235	0.84702
420704	NP_001239083.1	exosome complex component RRP42 [Gallus gallus]	31.645	27.1	6	8	6	1.056	0.986	0.966	1.007	1.008	0.982	0.982	-0.0262051	0.5458
422848	NP_001239087.1	syntaxin-18 [Gallus gallus]	38.387	32.4	8	9	8	1.058	0.963	1.015	0.962	0.956	0.948	0.948	-0.077041	0.156321
423337	NP_001239089.1	trafficking protein particle complex subunit 6B [Gallus gallus]	17.94	10.8	2	2	2	0.961	1.072	0.886	1.029	1.057	1.011	1.072	0.100305	0.2552
424731	NP_001239092.1	armadillo repeat-containing protein 8 [Gallus gallus]	75.329	7.9	5	6	5	0.873	1.134	1.078	0.963	0.907	1.044	1.099	0.136191	0.29548
428926	NP_001239258.1	nuclear export mediator factor NEMF [Gallus gallus]	121.72	7.7	7	7	7	0.933	1.032	0.892	1.083	1.016	1.054	1.115	0.157044	0.053016
427854	NP_001239540.1	V-type proton ATPase subunit S1 precursor [Gallus gallus]	50.544	14.3	5	5	5	1.053	1.083	1.059	0.968	1.023	0.936	0.953	-0.0694519	0.33062
420860	NP_001243428.1	transmembrane protein 14C-like [Gallus gallus]	10.986	11.3	1	2	1
100857533	NP_001243730.1	engulfment and cell motility protein 3 [Gallus gallus]	82.611	3.9	3	3	3
415586	NP_001243877.1	microfibrillar-associated protein 1 [Gallus gallus]	51.969	11.2	5	5	5	1.004	1.062	1.018	0.997	0.97	0.961	1.009	0.0129262	0.80308
416495	NP_001244129.1	ATP synthase subunit f, mitochondrial [Gallus gallus]	10.308	13.5	1	2	1	0.91	0.999	0.831	1.173	0.92	1.165	1.254	0.326537	0.021755
771327	NP_001244132.1	nucleolysin TIA-1 [Gallus gallus]	41.292	21.2	6	11	3	0.935	1.091	1.025	0.987	0.892	1.068	1.103	0.141433	0.1242
426519	NP_001244198.1	RUN and FYVE domain-containing protein 1 [Gallus gallus]	78.656	9.2	6	8	6	0.999	0.953	1.007	0.968	1.058	1.019	0.96	-0.0588937	0.20052
416051	NP_001244213.1	actin-related protein 2/3 complex subunit 4 [Gallus gallus]	19.706	57.1	8	15	8	0.998	0.922	0.963	0.957	1.131	1.005	0.933	-0.100051	0.2831
418453	NP_001244219.1	complex I assembly factor TIMMDC1, mitochondrial [Gallus gallus]	25.99	14.2	3	4	3	0.963	0.976	1.061	0.98	1.085	0.952	0.935	-0.0969617	0.156959
419884	NP_001244224.1	pre-mRNA-splicing factor SPF27 [Gallus gallus]	25.934	32	7	9	7	0.998	1.018	1.032	0.994	0.979	0.96	0.988	-0.0174171	0.61722
419904	NP_001244226.1	40S ribosomal protein S10 [Gallus gallus]	18.91	73.3	14	31	14	0.936	1.015	0.954	1.049	0.952	1.022	1.086	0.119024	0.0021588
425304	NP_001244261.1	condensin complex subunit 2 [Gallus gallus]	74.666	6.1	3	3	3	0.857	0.959	1.033	1.051	1.007	1.096	1.072	0.100305	0.36818
425468	NP_001244262.1	60S ribosomal protein L9 [Gallus gallus]	21.835	47.4	9	27	9	0.958	1.045	0.951	1.044	0.947	0.998	1.081	0.112367	0.0075604
426472	NP_001244270.1	secernin 3 [Gallus gallus]	46.906	11.7	4	6	4	1.015	0.868	0.992	1.034	1.141	0.971	0.913	-0.131313	0.24156
421648	NP_001254464.1	T-lymphoma invasion and metastasis-inducing protein 2 [Gallus gallus]	192.31	1.3	2	2	2	0.946	1.209	0.95	1.172	0.815	0.921	1.218	0.284514	0.125577
429710	NP_001254482.1	junction plakoglobin [Gallus gallus]	82.125	39.5	23	34	20	1.118	1.007	1.074	0.861	1.022	0.917	0.867	-0.205896	0.050777
426162	NP_001254502.1	TBC1 domain family member 1 [Gallus gallus]	134.24	1	1	1	1	1.089	1.059	1.045	0.919	0.935	0.961	0.958	-0.0619024	0.52518
421273	NP_001257591.1	ras-related protein Rab-1A [Gallus gallus]	22.708	70.7	14	40	13	0.972	0.997	1.019	1.024	1.009	1.009	1.01	0.0143553	0.56976
776932	NP_001258073.1	N-acetyltransferase 8B (GCN5-related, putative, gene/pseudogene) [Gallus gallus]	24.648	11.7	3	4	3	1.014	1.127	0.991	0.982	0.878	1.011	1.082	0.1137	0.26568
426571	NP_001258079.1	vacuolar protein sorting-associated protein 16 homolog [Gallus gallus]	95.786	13.1	8	8	8	1.027	0.964	0.987	1.033	0.986	0.997	0.998	-0.00288828	0.9309
100859604	NP_001258086.1	phenylalanine--tRNA ligase alpha subunit [Gallus gallus]	56.005	27	11	16	11	0.974	1.028	1.023	1.037	0.988	0.976	1.019	0.0271541	0.48312
100858483	NP_001258088.1	trafficking protein particle complex subunit 5 [Gallus gallus]	21.018	10.6	2	2	2	1.102	1	0.993	0.95	1.029	0.943	0.926	-0.110916	0.099643
419909	NP_001258541.1	ubiquinol-cytochrome-c reductase complex assembly factor 2 [Gallus gallus]	15.069	34.4	5	5	5	1.009	0.954	0.997	1.082	0.974	0.995	1.017	0.0243197	0.70382
424390	NP_001258859.1	inosine triphosphate pyrophosphatase [Gallus gallus]	22.262	60.2	8	11	8	1.07	0.961	1.004	0.958	1.032	0.997	0.939	-0.0908029	0.048619
424598	NP_001258861.1	peroxiredoxin-1 [Gallus gallus]	22.314	56.3	12	45	11	1.01	0.96	0.958	1.032	1.05	1.012	0.995	-0.00723157	0.90376
772196	NP_001258868.1	membrane-associated progesterone receptor component 1 [Gallus gallus]	21.282	61.5	10	21	9	0.947	1.051	0.999	1.028	0.959	0.996	1.059	0.0827026	0.064317
396446	NP_001258902.1	sarcoplasmic/endoplasmic reticulum calcium ATPase 2 isoform 1 [Gallus gallus]	109.75	32.8	28	64	28	0.949	1.041	0.992	1.08	0.911	1.037	1.107	0.146655	0.021161
408182	NP_001258911.1	NADH-cytochrome b5 reductase 2 [Gallus gallus]	33.669	5.3	2	2	2
396544	NP_001263232.1	nascent polypeptide-associated complex subunit alpha [Gallus gallus]	23.393	26.5	4	14	4	1.007	0.994	0.99	1.01	0.998	1.043	1.017	0.0243197	0.31892
100859133	NP_001263235.1	prostaglandin E synthase 3 [Gallus gallus]	18.638	41.9	7	18	7	1.035	0.959	1	0.981	1.068	0.975	0.939	-0.0908029	0.03682
416882	NP_001263253.1	endoplasmic reticulum resident protein 29 precursor [Gallus gallus]	28.191	42.9	14	21	14	0.945	1.027	0.945	1.075	0.979	1.06	1.102	0.140124	0.0056034
417891	NP_001263286.1	lumican precursor [Gallus gallus]	38.642	14.9	5	7	5	1.16	0.811	1.214	0.835	1.204	0.811	0.687	-0.541618	2.2511e-05
418558	NP_001263292.1	FUN14 domain-containing protein 1 [Gallus gallus]	17.279	10.9	1	1	1
407091	NP_001264033.1	ubiquitin-associated protein 2 [Gallus gallus]	116.07	8.3	6	6	2	1.004	0.934	1.047	1.013	0.942	1.061	1.005	0.0071955	0.92932
415494	NP_001264040.1	lactadherin isoform 2 precursor [Gallus gallus]	52.45	23.7	11	18	11	1.133	0.862	1.207	0.796	1.17	0.871	0.721	-0.471929	0.0006247
415499	NP_001264041.1	39S ribosomal protein L46, mitochondrial [Gallus gallus]	32.839	32.5	9	10	9	0.953	1.076	0.977	0.997	1.005	1.021	1.054	0.0758749	0.126465
426247	NP_001264054.1	dehydrogenase/reductase SDR family member 4 [Gallus gallus]	28.261	15.4	3	3	3	0.954	1.076	0.938	1.038	1.023	0.986	1.063	0.0881416	0.168598
415811	NP_001264068.1	M-phase phosphoprotein 6 [Gallus gallus]	19.526	12.2	2	2	2	1.108	0.926	1.012	0.997	1.063	0.914	0.891	-0.166503	0.037777
416142	NP_001264077.1	prefoldin subunit 1 isoform 3 [Gallus gallus]	13.43	28.7	4	5	4	1.026	0.984	0.967	1.037	1.022	1.037	1.014	0.0200577	0.61236
416544	NP_001264093.1	40S ribosomal protein S2 [Gallus gallus]	30.673	50.7	16	46	16	1.026	1.04	0.967	1.002	0.962	1.014	1.034	0.0482362	0.22072
416590	NP_001264098.1	ribosome biogenesis protein TSR3 homolog [Gallus gallus]	34.155	5.1	1	1	1
416609	NP_001264101.1	5-demethoxyubiquinone hydroxylase, mitochondrial [Gallus gallus]	24.78	20	4	5	4
418191	NP_001264205.1	pyridine nucleotide-disulfide oxidoreductase domain-containing protein 1 [Gallus gallus]	55.219	10.8	4	4	4	1.04	0.893	0.972	1.018	1.07	1.019	0.951	-0.0724828	0.37898
423726	NP_001264273.1	40S ribosomal protein S24 isoform 3 [Gallus gallus]	15.069	35.4	5	20	5	0.993	1.027	0.953	1.022	0.923	1.027	1.072	0.100305	0.080676
423747	NP_001264276.1	annexin A7 [Gallus gallus]	49.333	30.5	15	21	15	1.048	0.918	1.066	0.894	1.129	0.954	0.853	-0.229382	0.0056552
423768	NP_001264281.1	biogenesis of lysosome-related organelles complex 1 subunit 2 [Gallus gallus]	15.91	12.1	1	1	1
417916	NP_001264291.1	small nuclear ribonucleoprotein F [Gallus gallus]	9.7251	9.3	1	2	1
423852	NP_001264295.1	protein DPCD isoform 2 [Gallus gallus]	23.387	4.4	1	1	1	1.107	0.978	0.96	1.041	0.979	0.949	0.974	-0.0380063	0.6614
423869	NP_001264298.1	BLOC-1-related complex subunit 7 [Gallus gallus]	11.516	25.5	3	3	3
417975	NP_001264300.1	ribosomal RNA-processing protein 7 homolog A [Gallus gallus]	31.176	13.1	3	3	3	1.012	1.052	0.996	0.994	0.972	0.983	1.016	0.0229004	0.54232
423881	NP_001264304.1	glutathione S-transferase omega-1 [Gallus gallus]	27.261	61.1	16	25	16	1.074	0.862	1.056	0.905	1.195	0.939	0.814	-0.296899	0.0111402
417991	NP_001264305.1	PHD finger-like domain-containing protein 5A [Gallus gallus]	12.405	76.4	8	9	8	1.024	1.099	0.993	1.03	0.892	0.964	1.063	0.0881416	0.33592
418085	NP_001264312.2	glycosyltransferase 8 domain-containing protein 2 precursor [Gallus gallus]	40.047	16.3	5	8	5	0.968	1.063	0.977	1.016	0.958	0.946	1.042	0.0593553	0.30918
423968	NP_001264313.1	glutaredoxin-3 [Gallus gallus]	36.574	39.6	12	19	12	1.043	0.985	0.967	0.973	1.012	1.014	0.983	-0.0247367	0.55126
418093	NP_001264321.1	nucleoporin Nup37 [Gallus gallus]	36.949	26.4	8	9	8	0.977	0.995	0.968	1	1	1.01	1.02	0.0285692	0.129516
770828	NP_001264324.1	enoyl-CoA hydratase, mitochondrial precursor [Gallus gallus]	31.574	48.8	13	18	13	1.001	0.975	1.023	0.99	1.016	1.001	0.976	-0.0350469	0.068675
395758	NP_001264327.1	succinate dehydrogenase [ubiquinone] flavoprotein subunit, mitochondrial [Gallus gallus]	72.963	27.1	16	23	16	0.972	0.998	1	1.022	0.994	0.992	1.016	0.0229004	0.28738
420968	NP_001264328.1	charged multivesicular body protein 5 [Gallus gallus]	24.602	22.4	5	8	5	1	0.999	0.995	1.004	1.031	1.059	1.012	0.0172093	0.6216
423008	NP_001264333.1	l-isoaspartyl protein carboxyl methyltransferase, like isoform 2 precursor [Gallus gallus]	26.768	24.1	5	5	5	0.987	0.984	1.095	0.987	1.029	0.96	0.942	-0.086201	0.134803
424754	NP_001264338.1	DNA-directed RNA polymerase II subunit RPB4 [Gallus gallus]	16.325	54.2	5	5	5	0.975	1.013	1.095	1.071	0.966	0.944	0.997	-0.00433459	0.968
420213	NP_001264341.1	regulator of microtubule dynamics protein 1 [Gallus gallus]	34.457	22.2	6	8	6	1.039	1.002	0.963	1.085	0.99	1.019	1.038	0.0538064	0.31962
424795	NP_001264343.1	39S ribosomal protein L44, mitochondrial precursor [Gallus gallus]	36.056	19	6	6	6	0.946	1.017	0.986	1.057	1.006	0.965	1.034	0.0482362	0.35516
423082	NP_001264344.1	tumor susceptibility gene 101 protein [Gallus gallus]	44.124	9.5	3	3	3
420284	NP_001264367.1	mediator of RNA polymerase II transcription subunit 30 [Gallus gallus]	20.413	6.7	1	1	1
423280	NP_001264368.1	V-type proton ATPase subunit D [Gallus gallus]	28.236	46.2	9	11	9	0.956	1.006	1.003	1.009	1.059	1.111	1.036	0.051024	0.47146
423326	NP_001264372.1	proteasome subunit alpha type-6 [Gallus gallus]	27.47	47.2	12	26	12	0.948	1.056	0.962	1.044	1.003	1.016	1.07	0.0976108	0.029701
424889	NP_001264378.1	nuclear cap-binding protein subunit 2 isoform 1 [Gallus gallus]	18.07	24.8	4	4	3	0.951	1.029	0.967	1.038	1.001	1.023	1.059	0.0827026	0.02184
423327	NP_001264383.1	ral GTPase-activating protein subunit alpha-1 isoform 5 [Gallus gallus]	224.36	1.9	3	3	3	0.916	1.048	1.064	1.018	0.964	0.997	1.04	0.0565835	0.42196
424954	NP_001264394.1	DNA-directed RNA polymerases I, II, and III subunit RPABC3 isoform 1 [Gallus gallus]	17.143	24	3	5	3	0.925	1.04	0.956	1.031	1.05	1.01	1.051	0.0717627	0.25826
423374	NP_001264398.1	maleylacetoacetate isomerase isoform 2 [Gallus gallus]	23.977	36.3	6	9	6	0.95	1.023	1.035	0.956	0.988	0.996	1.001	0.00144197	0.97868
425027	NP_001264404.1	translocon-associated protein subunit gamma [Gallus gallus]	21.216	15.5	4	6	4	0.988	1.122	1.107	0.973	0.971	0.917	0.982	-0.0262051	0.79976
425280	NP_001264409.1	zinc finger protein 639 [Gallus gallus]	55.619	3.1	2	2	2	1.036	1.018	1.043	0.947	1	0.967	0.952	-0.0709665	0.12186
416837	NP_001264415.1	actin-related protein 2/3 complex subunit 3 [Gallus gallus]	20.549	35.4	7	12	7	0.935	1.003	0.962	0.984	1.07	1.018	1.013	0.0186342	0.75124
415863	NP_001264418.1	60S ribosome subunit biogenesis protein NIP7 homolog [Gallus gallus]	20.197	46.1	6	7	6	1.055	1.007	1.022	0.991	0.947	1.001	0.992	-0.011588	0.8425
420379	NP_001264419.1	elongator complex protein 6 [Gallus gallus]	29.407	7.2	2	2	2	0.931	1.028	0.942	1.077	0.978	1.051	1.107	0.146655	0.0071029
420551	NP_001264427.1	GATA zinc finger domain-containing protein 1 [Gallus gallus]	27.469	14.7	2	2	2
424367	NP_001264436.1	3-keto-steroid reductase isoform 2 [Gallus gallus]	33.904	23.9	6	7	6	0.896	1.089	1.135	1.035	1.068	0.972	0.999	-0.00144342	0.97232
416977	NP_001264437.1	TP53-regulated inhibitor of apoptosis 1 [Gallus gallus]	8.6828	19.7	2	3	2	0.989	1.089	0.977	1.015	0.938	1	1.069	0.0962619	0.098044
416978	NP_001264438.1	cytochrome c oxidase subunit VIa polypeptide 1 isoform 1 [Gallus gallus]	11.815	38.9	3	10	3	1.047	0.924	1.006	1.03	1.005	0.989	0.962	-0.0558912	0.31904
417018	NP_001264444.1	protein NipSnap homolog 1 [Gallus gallus]	32.47	29.7	6	8	6
416391	NP_001264454.1	NADH dehydrogenase [ubiquinone] 1 beta subcomplex subunit 6 [Gallus gallus]	14.917	28.9	3	3	3	0.901	0.933	1.078	1.047	0.977	1.066	1.03	0.0426443	0.666
416437	NP_001264458.1	brain-specific angiogenesis inhibitor 1-associated protein 2-like protein 1 [Gallus gallus]	56.622	6.3	4	4	4
424404	NP_001264466.1	microsomal glutathione S-transferase 3 [Gallus gallus]	15.707	25.9	3	5	3	0.937	1.003	1.071	0.977	1.058	0.979	0.965	-0.0513992	0.48046
415647	NP_001264470.1	protein FAM192A [Gallus gallus]	28.7	6.7	2	2	2	0.97	0.983	0.915	1.003	1.039	1.096	1.054	0.0758749	0.3472
424416	NP_001264476.1	acyl-CoA-binding domain-containing protein 6 [Gallus gallus]	29.365	33.2	7	8	7	1	0.965	0.967	1.003	1.025	1.047	1.008	0.0114956	0.81136
424436	NP_001264478.1	28S ribosomal protein S14, mitochondrial [Gallus gallus]	14.979	7.1	1	1	1	1.033	1.077	0.982	1.023	0.921	0.973	1.047	0.0662614	0.35912
416494	NP_001264480.1	cleavage and polyadenylation specificity factor subunit 4 [Gallus gallus]	27.548	4.5	1	2	1	1.038	1.022	0.969	1.008	0.952	1.018	1.03	0.0426443	0.37384
421337	NP_001264487.1	melanoma inhibitory activity protein 3 precursor [Gallus gallus]	221.69	24.3	46	57	46	0.977	1.038	1.02	1.018	0.983	1.003	1.027	0.0384362	0.19158
424529	NP_001264489.1	UPF0690 protein C1orf52 homolog [Gallus gallus]	20.19	7.7	1	1	1	0.915	1.074	1.014	0.96	1.088	0.966	0.994	-0.00868224	0.94594
416578	NP_001264493.1	conserved oligomeric Golgi complex subunit 7 [Gallus gallus]	86.619	10.5	6	9	6	1.014	0.998	1.018	0.993	1.04	1.024	0.981	-0.027675	0.20342
424565	NP_001264497.1	mediator of RNA polymerase II transcription subunit 8 [Gallus gallus]	29.314	14.2	2	2	2	1.041	0.878	1.146	0.97	1.011	0.965	0.88	-0.184425	0.062219
423585	NP_001264498.1	ERO1-like protein alpha precursor [Gallus gallus]	52.918	41.3	16	34	15	0.983	1.013	0.996	1.026	0.981	0.996	1.025	0.0356239	0.063836
424567	NP_001264499.1	putative hydroxypyruvate isomerase [Gallus gallus]	30.716	51.6	10	10	10	1.022	0.968	1.004	0.986	0.995	1.032	0.988	-0.0174171	0.59264
416594	NP_001264503.1	uncharacterized protein C16orf45 homolog [Gallus gallus]	23.561	5.4	1	1	1	0.963	0.958	0.977	0.991	1.059	1.059	1.003	0.00432161	0.946
416657	NP_001264514.1	enoyl-CoA delta isomerase 1, mitochondrial [Gallus gallus]	34.294	36	12	29	12	0.959	1	1.004	1.032	0.989	0.995	1.025	0.0356239	0.22818
415765	NP_001264515.1	programmed cell death protein 5 [Gallus gallus]	14.219	54	6	10	6	0.969	0.957	0.981	0.981	1.04	1.035	0.994	-0.00868224	0.86502
421392	NP_001264516.1	cytochrome c oxidase subunit VIIa polypeptide 2 like isoform 1 [Gallus gallus]	12.614	12.1	1	2	1	1.083	1.07	1.021	1.078	0.85	0.91	1.035	0.0496308	0.70802
424613	NP_001264521.1	5-methylcytosine rRNA methyltransferase NSUN4 [Gallus gallus]	44.818	3.7	1	1	1
426987	NP_001264526.1	28S ribosomal protein S34, mitochondrial [Gallus gallus]	25.156	19.5	6	7	6	0.943	0.989	0.989	1.085	1.002	1.004	1.049	0.0690147	0.2369
422262	NP_001264532.1	tetraspanin-6 [Gallus gallus]	27.827	17.9	4	4	4	1.066	0.962	1.119	0.872	1.057	0.936	0.854	-0.227692	0.0099395
415790	NP_001264535.1	GTP-binding protein RAD [Gallus gallus]	34.093	4.3	1	1	1
424653	NP_001264539.1	protein YIPF1 isoform b [Gallus gallus]	33.655	6.4	1	1	1	0.988	0.868	1.047	0.99	1.083	1.033	0.927	-0.109359	0.2578
424659	NP_001264545.1	probable proline--tRNA ligase, mitochondrial precursor [Gallus gallus]	51.961	7.7	3	3	3
769737	NP_001264549.1	NAD(P)H dehydrogenase [quinone] 1 isoform 2 [Gallus gallus]	29.171	25.8	5	7	5	0.984	1.036	0.93	0.996	1.005	1.039	1.052	0.0731347	0.129879
421445	NP_001264552.1	39S ribosomal protein S18a, mitochondrial isoform 1 [Gallus gallus]	21.707	9.5	2	2	2	1.002	1.051	0.895	1.035	0.983	1.043	1.086	0.119024	0.13926
421452	NP_001264559.1	DNA-directed RNA polymerases I and III subunit RPAC1 isoform 1 [Gallus gallus]	39.379	28.6	8	9	8	0.913	1.006	0.999	0.997	0.93	1.09	1.088	0.121679	0.098719
770048	NP_001264561.1	COMM domain-containing protein 4 isoform a [Gallus gallus]	22.093	25.1	5	5	4	0.927	1.045	0.875	1.013	1.014	1.127	1.131	0.177599	0.080661
416506	NP_001264566.1	mediator of RNA polymerase II transcription subunit 9 [Gallus gallus]	13.486	15	2	2	2	1.019	0.986	1.15	0.913	0.911	1.02	0.948	-0.077041	0.53886
422303	NP_001264569.1	centrin-2 [Gallus gallus]	19.61	16.9	2	2	2	1.071	0.976	1.054	0.9	1.156	0.869	0.837	-0.2567	0.016102
429105	NP_001264572.1	sel1 repeat-containing protein 1 isoform 1 [Gallus gallus]	25.493	7.8	2	2	2
770162	NP_001264577.1	calcium and integrin-binding protein 1 isoform a [Gallus gallus]	21.554	8.9	2	2	2	0.998	0.968	1.008	1.097	0.914	1.021	1.057	0.0799754	0.31416
100857155	NP_001264579.1	adenine phosphoribosyltransferase isoform 2 [Gallus gallus]	16.685	50.7	6	8	6	0.989	1.016	0.988	1.014	0.937	1.044	1.055	0.077243	0.05628
770307	NP_001264583.2	huntingtin-interacting protein K [Gallus gallus]	14.111	43.4	5	6	5	0.944	1.085	0.912	1.003	0.927	1.052	1.128	0.173767	0.0085001
417112	NP_001264584.1	NADH dehydrogenase [ubiquinone] 1 alpha subcomplex subunit 8 isoform 1 [Gallus gallus]	20.125	47.1	6	7	6	1.028	0.918	1.081	0.924	0.983	1.068	0.941	-0.0877334	0.33154
770018	NP_001264592.1	60S ribosomal protein L27a [Gallus gallus]	16.808	27	4	16	4	0.999	1.053	0.97	1.077	0.896	1.039	1.106	0.145351	0.040696
771795	NP_001264596.1	pre-mRNA-splicing factor 38A [Gallus gallus]	37.46	9.9	3	3	3	0.95	0.997	0.953	1.03	0.96	1.109	1.095	0.130931	0.104437
415757	NP_001264600.1	uncharacterized protein LOC415757 isoform 2 [Gallus gallus]	14.82	12.1	2	2	2	0.869	0.998	0.952	0.965	1.083	1.135	1.067	0.0935602	0.45786
421616	NP_001264601.1	ras-related protein Rab-32 [Gallus gallus]	24.346	10.1	2	2	1
771939	NP_001264602.1	cytochrome b-c1 complex subunit 6, mitochondrial [Gallus gallus]	10.062	29.1	2	3	2	0.963	1.008	1.012	1.078	0.932	1.014	1.066	0.0922074	0.115737
100858636	NP_001264603.1	cleavage and polyadenylation specificity factor subunit 5 [Gallus gallus]	26.255	33.5	7	10	7	1.076	1.054	1.015	0.935	0.937	0.955	0.972	-0.0409718	0.63556
417203	NP_001264604.1	putative methyltransferase C9orf114 homolog [Gallus gallus]	43.078	5	2	2	2	1.036	1.01	0.944	1.007	1.034	0.983	0.995	-0.00723157	0.91086
417249	NP_001264606.1	V-type proton ATPase subunit G 1 [Gallus gallus]	13.552	8.5	1	2	1	1.035	1.04	0.98	1.029	0.975	0.955	1.011	0.015783	0.756
417264	NP_001264608.1	60S ribosomal protein L12 [Gallus gallus]	17.737	60	10	19	10	0.973	1.017	0.964	1.015	0.977	1.053	1.059	0.0827026	0.0106239
415701	NP_001264613.1	F-box/LRR-repeat protein 8 [Gallus gallus]	43.722	5	2	2	2
770750	NP_001264621.1	14 kDa phosphohistidine phosphatase isoform 1 [Gallus gallus]	13.83	66.4	7	9	7	1.081	0.92	1.008	0.885	1.13	0.964	0.86	-0.217591	0.022315
776031	NP_001264628.1	angiopoietin-related protein 2 precursor [Gallus gallus]	57.303	10.8	5	6	5	1.021	0.821	1.191	0.878	1.228	0.844	0.739	-0.436354	0.0077151
427627	NP_001264642.1	ras-related protein Rab-24 [Gallus gallus]	23.03	26.1	5	6	5	0.884	0.997	0.774	1.163	0.943	1.234	1.305	0.38405	0.036859
100857200	NP_001264644.1	U3 small nucleolar ribonucleoprotein protein IMP4 [Gallus gallus]	32.975	23.8	7	7	6	0.993	1.014	0.982	0.97	0.978	1.067	1.033	0.0468403	0.31668
100858296	NP_001264646.1	60S ribosomal protein L22-like 1 [Gallus gallus]	14.383	25.4	3	4	3	0.966	1.074	0.968	1.048	0.921	1.029	1.104	0.14274	0.0084601
771953	NP_001264656.1	39S ribosomal protein L33, mitochondrial [Gallus gallus]	7.6492	18.5	1	1	1	1.007	0.952	1.042	0.997	1.052	0.965	0.94	-0.0892673	0.031056
418568	NP_001264657.1	60S ribosomal protein L8 [Gallus gallus]	28.022	50.6	12	26	12	0.998	1.077	1.011	0.986	0.982	0.985	1.019	0.0271541	0.5887
421930	NP_001264658.1	isoamyl acetate-hydrolyzing esterase 1 homolog [Gallus gallus]	27.653	36.9	8	10	8	1.051	0.984	1.122	0.994	0.96	0.95	0.935	-0.0969617	0.23598
418580	NP_001264663.1	dynein light chain Tctex-type 3 [Gallus gallus]	13.077	7.8	1	2	1	0.995	1.065	0.984	1.026	0.928	1.009	1.066	0.0922074	0.07442
418619	NP_001264666.1	synapse-associated protein 1 [Gallus gallus]	40.836	17.1	6	6	6	0.946	1.076	0.969	0.988	0.979	1.048	1.075	0.104337	0.0569
416221	NP_001264672.1	sideroflexin-1 [Gallus gallus]	35.675	43.2	12	26	11	1.026	0.968	1.089	0.961	1.018	0.942	0.916	-0.12658	0.0188636
422675	NP_001264678.1	mitotic spindle assembly checkpoint protein MAD2A [Gallus gallus]	23.711	7.8	1	1	1
416538	NP_001264681.1	acylpyruvase FAHD1, mitochondrial [Gallus gallus]	24.711	22.9	5	6	5	0.867	0.932	1.06	1.021	0.982	1.058	1.035	0.0496308	0.62858
418710	NP_001264684.1	60S ribosomal protein L31 [Gallus gallus]	14.436	54.4	8	17	8	0.963	1.086	0.962	1.027	0.944	1.017	1.091	0.125651	0.0155794
418723	NP_001264687.1	28S ribosomal protein S9, mitochondrial isoform 2 [Gallus gallus]	38.384	39.1	11	15	11	1.019	1.019	1.025	1.035	0.972	0.966	1.001	0.00144197	0.96722
418767	NP_001264691.1	testis-expressed protein 30 [Gallus gallus]	25.216	8	2	2	2	0.977	1.096	0.968	1.001	1.04	0.936	1.016	0.0229004	0.79206
418968	NP_001264708.1	acetyl-CoA acetyltransferase, mitochondrial [Gallus gallus]	44.09	51.8	17	37	17	0.965	1.028	1.016	1.03	0.932	1.021	1.057	0.0799754	0.156235
430724	NP_001264717.1	synaptojanin 2 binding protein [Gallus gallus]	15.457	19.9	3	3	3	0.947	1.053	1.051	0.999	0.965	0.993	1.028	0.0398403	0.4924
422362	NP_001264718.1	C1GALT1-specific chaperone 1 [Gallus gallus]	36.044	5	2	2	2
422152	NP_001264725.1	transcription initiation factor TFIID subunit 9B [Gallus gallus]	27.883	20	5	5	5	0.949	1.085	0.974	1.041	0.942	1.015	1.096	0.132248	0.0138801
416071	NP_001264733.1	bis(5'-adenosyl)-triphosphatase [Gallus gallus]	16.88	8.1	1	1	1
422769	NP_001264750.1	COMM domain-containing protein 8 [Gallus gallus]	20.123	8	2	2	2	0.999	0.991	0.967	0.997	0.977	1.073	1.04	0.0565835	0.22882
418996	NP_001264753.1	spliceosome-associated protein CWC15 homolog [Gallus gallus]	26.646	20.4	4	4	4	1.048	1.091	1.024	0.992	0.994	0.963	0.993	-0.0101344	0.8582
418320	NP_001264754.1	uncharacterized protein LOC418320 [Gallus gallus]	241.13	0.3	1	1	1
771257	NP_001264758.1	dynactin subunit 6 [Gallus gallus]	20.672	26.3	4	8	4	1.056	0.991	1.041	1.024	0.956	1.002	0.988	-0.0174171	0.75212
416129	NP_001264769.1	28S ribosomal protein S25, mitochondrial [Gallus gallus]	20.074	34.7	4	5	4	0.945	0.987	1.078	1.026	0.989	0.985	0.995	-0.00723157	0.9388
100857115	NP_001264782.2	glutathione peroxidase 1 [Gallus gallus]	21.93	42.6	6	9	6	1.156	1.036	1.041	0.789	1.076	0.928	0.841	-0.249822	0.103803
425783	NP_001264787.1	C-type lectin domain family 2 member D-like [Gallus gallus]	21.691	9.5	1	1	1
101410532	NP_001264788.1	selenoprotein M precursor [Gallus gallus]	17.051	34.9	4	5	4	1.052	1.076	0.959	1.016	0.974	0.925	1.011	0.015783	0.8645
416040	NP_001264791.1	U6 snRNA-associated Sm-like protein LSm3 [Gallus gallus]	11.859	11.8	1	2	1	1.016	0.996	0.948	0.961	1.064	1.026	0.985	-0.0218044	0.73086
100858006	NP_001264794.1	selenoprotein H [Gallus gallus]	13.902	20.9	3	3	3	0.902	1.019	1.011	0.99	1.044	0.999	1.017	0.0243197	0.69608
417261	NP_001264795.1	39S ribosomal protein L41, mitochondrial [Gallus gallus]	15.188	26.7	3	5	3	0.892	1.011	1.052	1.028	1.029	0.999	1.022	0.0313952	0.66816
427708	NP_001264808.1	dynein light chain 1 cytoplasmic [Gallus gallus]	10.334	32.6	2	13	2	1.057	0.96	1.025	1.053	0.978	0.962	0.972	-0.0409718	0.49286
776054	NP_001264809.1	40S ribosomal protein S29 [Gallus gallus]	6.6767	46.4	3	4	3	0.98	0.956	0.861	1.066	0.985	1.151	1.123	0.167358	0.174083
423181	NP_001264811.1	protein tyrosine phosphatase, mitochondrial 1 [Gallus gallus]	21.839	8.8	1	1	1
420290	NP_001264826.1	hydroxyacyl-coenzyme A dehydrogenase, mitochondrial [Gallus gallus]	34.421	20.3	9	15	9	0.97	1.021	1.075	0.966	0.995	0.954	0.967	-0.0484122	0.43148
418169	NP_001264828.1	aldo-keto reductase family 1, member B10 (aldose reductase) [Gallus gallus]	35.623	36.1	11	18	4	0.944	0.921	0.953	1.009	1.095	1.087	1.008	0.0114956	0.90774
419474	NP_001264834.1	MICOS complex subunit MIC10 [Gallus gallus]	8.4898	10.4	1	1	1	0.988	0.905	1.062	1.016	1.054	0.989	0.938	-0.0923402	0.193637
422351	NP_001264835.1	26S proteasome non-ATPase regulatory subunit 10 [Gallus gallus]	24.007	17.7	3	3	3	1.007	1.012	1.024	0.976	0.983	1.006	0.993	-0.0101344	0.70488
769169	NP_001264836.1	THO complex subunit 4 [Gallus gallus]	26.695	39.2	9	22	9	0.995	1.079	0.983	0.981	0.948	1.011	1.05	0.0703893	0.20544
421698	NP_001264840.1	40S ribosomal protein S12 [Gallus gallus]	13.529	59.5	8	26	8	1.003	1.079	0.923	1.024	0.959	1.037	1.088	0.121679	0.041579
422449	NP_001264844.1	ELMO domain-containing protein 2 [Gallus gallus]	35.307	7.1	2	2	2	0.97	1.044	0.917	1.066	0.931	1.074	1.13	0.176323	0.0028806
421719	NP_001264847.1	HD domain-containing protein 2 [Gallus gallus]	22.433	5.6	1	1	1
426666	NP_001264896.1	28S ribosomal protein S21, mitochondrial [Gallus gallus]	10.184	37.9	3	4	3	0.93	1.036	1.011	1.027	1.044	0.968	1.015	0.0214797	0.7128
416368	NP_001264922.1	secretory carrier-associated membrane protein 1 [Gallus gallus]	38.13	20.4	5	7	5	0.965	0.991	1.028	1.017	0.984	0.918	0.983	-0.0247367	0.64558
776411	NP_001264927.1	small nuclear ribonucleoprotein Sm D1 [Gallus gallus]	12.393	21.4	3	5	3	0.956	1.077	0.955	1.113	0.982	0.969	1.092	0.126973	0.113796
418122	NP_001264936.1	single-stranded DNA-binding protein, mitochondrial [Gallus gallus]	17.259	46.3	6	8	6	0.968	1.017	1.006	1.028	0.972	1.011	1.037	0.0524159	0.048901
419256	NP_001264938.1	dnaJ homolog subfamily C member 5 [Gallus gallus]	22.097	12.1	2	3	2	0.883	1.097	1.052	1.004	1.044	0.936	1.019	0.0271541	0.7949
771528	NP_001264941.1	60S ribosomal protein L38 [Gallus gallus]	8.2178	31.4	3	8	3	0.915	1.041	0.886	1.106	0.946	1.039	1.16	0.214125	0.0060427
419286	NP_001264943.1	COMM domain-containing protein 7 isoform 2 [Gallus gallus]	22.173	30	6	7	6	1.021	1.005	0.91	0.983	1.023	1.065	1.034	0.0482362	0.49778
419337	NP_001264944.1	prefoldin subunit 4 [Gallus gallus]	15.4	30.6	5	6	5	0.997	0.997	1.028	0.959	0.99	0.977	0.973	-0.0394883	0.16226
769996	NP_001264957.1	28S ribosomal protein S16, mitochondrial isoform 2 [Gallus gallus]	11.163	14.9	2	2	2
418269	NP_001264962.1	coiled-coil domain-containing protein 58 isoform 2 [Gallus gallus]	16.698	16.7	2	2	2
100859720	NP_001264968.1	succinate dehydrogenase [ubiquinone] iron-sulfur subunit, mitochondrial isoform 2 precursor [Gallus gallus]	31.678	42	10	19	10	0.994	1.001	1.071	0.992	1.007	0.95	0.958	-0.0619024	0.20398
395218	NP_001264977.1	fructose-1,6-bisphosphatase 1 [Gallus gallus]	36.73	4.1	1	1	1	0.546	0.558	0.672	1.231	1.447	1.541	1.25	0.321928	0.61912
419739	NP_001264990.1	isobutyryl-CoA dehydrogenase, mitochondrial [Gallus gallus]	44.118	7.9	2	2	2	0.972	1.001	1.009	1.096	0.952	0.981	1.049	0.0690147	0.2816
418292	NP_001264998.1	ribosomal RNA small subunit methyltransferase NEP1 [Gallus gallus]	25.566	28.6	5	7	5	0.999	0.984	0.99	1.037	0.986	0.983	1.01	0.0143553	0.63048
418369	NP_001264999.1	ubiquitin-like-conjugating enzyme ATG3 [Gallus gallus]	35.669	20.1	6	9	6	0.952	1.02	0.973	1.014	0.999	1.033	1.049	0.0690147	0.032881
418458	NP_001265005.1	lysophosphatidic acid phosphatase type 6 isoform 1 precursor [Gallus gallus]	46.84	22.7	7	9	7	0.868	1.02	1.036	1.11	0.988	0.989	1.078	0.108357	0.28894
418510	NP_001265008.1	calcipressin-1 [Gallus gallus]	22.123	9.8	1	1	1	0.921	1.059	0.99	1.067	0.873	1.087	1.154	0.206643	0.017824
425137	NP_001265009.1	aldo-keto reductase family 1, member B1-like [Gallus gallus]	35.897	36.7	10	18	0
416742	NP_001265012.1	arginine-hydroxylase NDUFAF5, mitochondrial [Gallus gallus]	37.608	3.5	1	1	1	1.047	0.986	1.087	0.962	0.905	1.015	0.975	-0.0365259	0.7179
418549	NP_001265013.1	pyridoxal kinase isoform 1 [Gallus gallus]	35.015	34.7	8	13	8	0.586	1.043	0.537	1.573	0.57	1.454	2.404	1.26544	0.0025629
419048	NP_001265021.1	28S ribosomal protein S35, mitochondrial isoform 2 [Gallus gallus]	32.116	25.5	6	9	6	0.95	1.023	1.062	1.067	0.968	1.026	1.046	0.0648829	0.28522
417797	NP_001265024.1	twinfilin-1 isoform 1 [Gallus gallus]	40.071	32	11	13	8	1.002	1.096	0.892	1.017	0.998	1.012	1.081	0.112367	0.164318
425349	NP_001265028.1	dual specificity protein phosphatase 12 [Gallus gallus]	33.321	3.9	1	1	1
418452	NP_001265032.1	ADP-ribosylarginine hydrolase isoform 3 [Gallus gallus]	28.689	8.8	2	2	2	1.001	0.91	1.098	1.039	1.083	0.891	0.893	-0.163268	0.109035
427897	NP_001265037.1	NADH dehydrogenase [ubiquinone] 1 alpha subcomplex subunit 6 [Gallus gallus]	14.396	21.3	3	6	3	0.939	0.78	1.19	1.047	1.108	0.953	0.859	-0.21927	0.23788
427848	NP_001265046.1	RAD50-interacting protein 1 [Gallus gallus]	87.885	11.2	8	9	8	0.945	0.991	0.991	1.045	0.986	1.021	1.046	0.0648829	0.103801
419761	NP_001265049.1	oligoribonuclease, mitochondrial [Gallus gallus]	26.65	11.6	2	2	2	0.976	0.961	0.953	1.095	0.88	1.131	1.135	0.182692	0.101143
768451	NP_001265053.1	mitochondrial pyruvate carrier 2 [Gallus gallus]	15.121	12	2	3	2	0.94	0.986	1.037	1.013	0.979	1.049	1.031	0.0440443	0.40726
770258	NP_001265279.1	thymidylate kinase [Gallus gallus]	24.082	34.4	7	8	6	0.99	0.912	0.999	1.037	1.049	1.07	0.994	-0.00868224	0.88106
415507	NP_001265383.1	chromodomain-helicase-DNA-binding protein 2 [Gallus gallus]	212.83	2.9	5	5	5	0.904	1.013	1.059	1.03	0.977	1.023	1.043	0.0607392	0.439
426917	NP_001265655.1	jmjC domain-containing protein 8 precursor [Gallus gallus]	29.355	5.4	1	1	1	1.01	1.008	1.005	1.016	1.027	0.95	0.978	-0.0320936	0.3582
427195	NP_001268674.1	polyadenylate-binding protein-interacting protein 1 isoform 2 [Gallus gallus]	42.227	11.3	3	4	3
101752092	NP_001269123.1	ceroid-lipofuscinosis neuronal protein 5 precursor [Gallus gallus]	39.278	13.9	5	7	5	1.023	1.006	0.993	0.979	1.002	0.987	0.985	-0.0218044	0.26816
418811	NP_001269129.1	ES1 protein homolog, mitochondrial-like [Gallus gallus]	23.931	58.7	12	17	11	1.05	0.887	1.03	0.898	1.146	0.999	0.863	-0.212568	0.041882
416399	NP_001269159.1	nucleoside diphosphate kinase 3 precursor [Gallus gallus]	20.426	30.6	5	8	4	0.998	1.132	0.872	0.953	1.067	0.992	1.048	0.0676387	0.58112
772208	NP_001269224.1	thioredoxin domain-containing protein 12 precursor [Gallus gallus]	18.562	45.9	8	25	8	0.951	1.069	1.002	1.012	0.944	0.993	1.061	0.0854247	0.110923
424637	NP_001269225.1	protein KTI12 homolog [Gallus gallus]	25.995	5.5	1	1	1
101747696	NP_001269232.1	cysteine-rich protein 1 [Gallus gallus]	8.5998	31.2	3	4	2	1.165	0.761	1.1	0.732	1.409	0.867	0.642	-0.639355	0.0083422
427835	NP_001269268.1	gem-associated protein 4 [Gallus gallus]	119.25	3.5	4	4	4	0.994	1.043	1.007	1.047	0.943	1.016	1.055	0.077243	0.072104
101750166	NP_001269270.1	glyoxalase domain-containing protein 4 [Gallus gallus]	34.557	30.4	9	15	9	1.011	0.9	1.015	0.958	1.135	1.004	0.905	-0.14401	0.115876
428563	NP_001269310.1	mitochondrial amidoxime-reducing component 1 [Gallus gallus]	37.414	16.1	5	7	5	0.955	1.063	1.01	1.128	0.896	0.993	1.113	0.154454	0.102056
429016	NP_001269324.1	tetratricopeptide repeat protein 30A [Gallus gallus]	75.143	1.7	1	1	1
419488	NP_001272908.1	chloride transport protein 6 [Gallus gallus]	97.189	1.7	1	1	1	1.093	1.108	1.055	0.921	0.948	0.89	0.943	-0.0846703	0.48498
420053	NP_001273092.1	mitochondrial import inner membrane translocase subunit TIM44 [Gallus gallus]	51.264	35.7	16	24	16	0.987	1.039	1.016	1.016	0.97	1.015	1.033	0.0468403	0.106415
425132	NP_001274125.1	nitrogen permease regulator-like 2 [Gallus gallus]	43.418	1.9	1	1	1
395796	NP_001274134.1	ubiquitin-40S ribosomal protein S27a [Gallus gallus]	17.979	68.6	10	53	6	1.015	0.985	0.941	1.032	0.976	1.034	1.041	0.0579701	0.21264
417378	NP_001276817.1	casein kinase I isoform delta [Gallus gallus]	46.762	10	4	5	3	1.091	0.976	0.824	1.182	0.827	1.101	1.189	0.249749	0.17514
421192	NP_001277063.1	exportin-1 [Gallus gallus]	123.16	23.9	21	39	21	1.004	1.006	0.984	1.012	1.004	1.011	1.012	0.0172093	0.150883
101749861	NP_001277130.1	protein CASP [Gallus gallus]	77.43	29.6	18	21	2	0.981	1.048	0.974	1.053	1.021	0.941	1.022	0.0313952	0.62632
417273	NP_001278335.1	aminolevulinate dehydratase [Gallus gallus]	36.47	33	7	10	7	1.062	0.953	1.002	0.928	1.049	0.97	0.916	-0.12658	0.0159631
422093	NP_001278895.1	ethanolamine-phosphate cytidylyltransferase [Gallus gallus]	39.814	8	3	3	3
428274	NP_001278998.1	26S proteasome regulatory subunit 8 [Gallus gallus]	46.172	61.8	23	44	22	0.967	1.02	0.987	1.041	0.976	1.023	1.053	0.0745054	0.0041403
769203	NP_001279000.1	pyrroline-5-carboxylate reductase 1, mitochondrial [Gallus gallus]	33.26	56	17	29	17	1.087	1.004	1.094	0.871	1.045	0.907	0.862	-0.21424	0.028476
769405	NP_001279015.1	RNA polymerase-associated protein LEO1 [Gallus gallus]	74.787	3.5	2	2	2	1.114	0.997	0.974	0.994	0.973	0.961	0.964	-0.0528949	0.50076
419901	NP_001280095.1	U1 small nuclear ribonucleoprotein C [Gallus gallus]	17.396	18.9	3	4	1	1.013	1.032	0.932	1.096	0.97	0.972	1.063	0.0881416	0.22236
415308	NP_001280114.1	tyrosine-protein phosphatase non-receptor type 9 [Gallus gallus]	66.22	20.3	10	15	10	0.923	1.01	0.942	1.086	0.958	1.03	1.107	0.146655	0.0137004
415317	NP_001280139.1	ADP-dependent glucokinase precursor [Gallus gallus]	52.965	14.3	6	11	6	0.976	1.017	1.046	1.025	0.977	0.997	1.013	0.0186342	0.60354
415385	NP_001280147.1	methylmalonyl-CoA epimerase, mitochondrial isoform 2 [Gallus gallus]	18.747	12.7	2	2	2
415389	NP_001280151.1	probable threonyl-tRNA synthetase 2, cytoplasmic [Gallus gallus]	90.262	14.2	12	19	8	0.991	1.034	0.964	0.99	0.967	1.053	1.053	0.0745054	0.064243
415390	NP_001280156.1	TM2 domain-containing protein 3 isoform 2 [Gallus gallus]	27.87	3.6	1	1	1
415350	NP_001280159.1	reticulocalbin-2 isoform 2 precursor [Gallus gallus]	35.71	46.2	15	24	15	1.002	1.016	1.015	1.014	0.963	1.005	1.018	0.0257376	0.31594
395497	NP_001280170.1	V-type proton ATPase subunit B [Gallus gallus]	55.635	39.2	16	23	16	1.004	1.008	1.02	1.005	0.962	1.01	1.012	0.0172093	0.54672
415635	NP_001280231.1	DNA-directed RNA polymerase II subunit RPB3 [Gallus gallus]	31.361	16.7	4	7	4	1.006	1.02	1.028	1.042	0.963	0.976	1.014	0.0200577	0.64376
408046	NP_001280234.1	kinesin heavy chain isoform 5C [Gallus gallus]	109.46	38.7	32	52	20	0.991	0.982	1.059	0.927	1.088	0.981	0.921	-0.118727	0.071635
415580	NP_001280237.1	transmembrane emp24 domain-containing protein 3 isoform 2 precursor [Gallus gallus]	22.03	9.4	2	2	2	0.969	1.061	1.068	0.966	0.985	0.962	0.989	-0.0159576	0.81282
415674	NP_001280240.1	V-type proton ATPase subunit d 1 [Gallus gallus]	40.321	19.4	8	11	8	1.05	1.001	1.013	1.011	0.999	1.069	1.006	0.00863031	0.82436
415923	NP_001280243.1	E3 ubiquitin-protein ligase RNF123 [Gallus gallus]	147.57	1.1	2	3	2	1.136	1	0.868	1.021	0.921	1.058	1.053	0.0745054	0.52556
415924	NP_001280244.1	mannose-1-phosphate guanyltransferase beta [Gallus gallus]	39.435	16.9	5	6	5	1.042	0.968	1.034	0.966	1.024	1.034	0.957	-0.0634092	0.127135
415938	NP_001280248.1	testis-expressed protein 264 [Gallus gallus]	35.957	30	8	9	8	1.01	1.008	0.968	1.04	0.972	1.009	1.036	0.051024	0.103204
427608	NP_001288615.1	steroid receptor RNA activator 1 [Gallus gallus]	22.865	25.6	2	2	2	0.939	1.101	0.879	1.049	0.952	1.083	1.167	0.222805	0.0055003
769794	NP_001289020.1	splicing factor 3B subunit 5 [Gallus gallus]	10.094	40.7	3	5	3	0.965	1.065	0.945	1.052	0.936	1.059	1.116	0.158337	0.00034261
771344	NP_001289021.1	small nuclear ribonucleoprotein G [Gallus gallus]	8.462	36.8	5	11	5	1.039	0.991	1.019	0.979	0.966	0.997	0.981	-0.027675	0.45388
426296	NP_001289022.1	protein FAM136A [Gallus gallus]	15.139	41.3	4	7	4	0.999	0.978	1.024	1.031	0.971	1.015	1.01	0.0143553	0.67314
768795	NP_001289025.1	SH3 domain-binding glutamic acid-rich-like protein 3 [Gallus gallus]	10.463	40.9	5	8	5	1.004	0.823	1.127	0.833	1.16	0.997	0.806	-0.311148	0.046041
772135	NP_001289036.1	cytochrome c oxidase subunit NDUFA4 [Gallus gallus]	9.497	46.3	6	11	6	1.062	0.981	0.986	1.026	0.966	0.988	0.994	-0.00868224	0.86754
422190	NP_001289039.1	mitochondrial import inner membrane translocase subunit Tim8 A [Gallus gallus]	10.686	57.4	5	8	5	1.015	1.042	0.987	1.04	0.945	0.998	1.045	0.0635029	0.151858
422466	NP_001289055.1	U6 snRNA-associated Sm-like protein LSm6 isoform 2 [Gallus gallus]	9.1275	35	3	6	3	1.044	1.019	0.96	0.992	0.993	1.009	1.008	0.0114956	0.76532
100859721	NP_001289056.1	apolipoprotein C-III precursor [Gallus gallus]	10.26	18.3	2	2	2	1.249	0.584	1.645	0.572	1.44	0.559	0.396	-1.33643	0.0075583
419924	NP_001289063.1	mitochondrial import receptor subunit TOM6 homolog [Gallus gallus]	7.896	18.4	1	2	1	0.826	0.956	1.137	1.159	0.966	0.969	1.053	0.0745054	0.64014
424538	NP_001289064.1	guanine nucleotide-binding protein G(I)/G(S)/G(O) subunit gamma-5 [Gallus gallus]	7.3765	23.5	2	3	2
768860	NP_001289066.1	NADH dehydrogenase [ubiquinone] 1 alpha subcomplex subunit 2 [Gallus gallus]	11.071	26	3	4	3	0.963	1.028	0.967	1.088	0.983	0.984	1.064	0.0894982	0.107962
428138	NP_001289074.1	protein MANBAL [Gallus gallus]	9.3219	24.4	2	2	2
771947	NP_001289075.1	cytochrome c oxidase subunit 7B, mitochondrial [Gallus gallus]	8.9072	15.2	1	3	1	0.977	1.018	1.006	1.011	1.062	0.943	0.976	-0.0350469	0.52144
770937	NP_001289078.1	cytochrome b-c1 complex subunit 9 [Gallus gallus]	7.1261	40.3	2	3	2	0.898	0.988	0.972	1.133	0.86	1.144	1.196	0.258217	0.040002
417663	NP_001289085.1	dynein light chain 2, cytoplasmic [Gallus gallus]	10.35	32.6	2	5	2	1.087	0.925	0.998	0.916	1.078	1.007	0.9	-0.152003	0.060579
420997	NP_001289088.1	protein transport protein Sec61 subunit beta [Gallus gallus]	10.014	44.8	4	10	4	0.921	0.971	0.98	1.039	0.929	0.979	1.056	0.0786098	0.131376
101749130	NP_001289095.1	immediate early response 3-interacting protein 1 precursor [Gallus gallus]	8.8995	24.4	1	1	1	1.037	1.069	0.983	0.958	0.984	0.979	1.001	0.00144197	0.99694
770190	NP_001289098.1	COX17 cytochrome c oxidase copper chaperone [Gallus gallus]	7.2084	44.8	3	5	3	1.052	1.014	0.983	1.047	1.098	0.981	0.971	-0.0424568	0.48312
770704	NP_001289101.1	DNA-directed RNA polymerases I, II, and III subunit RPABC5 [Gallus gallus]	7.645	29.9	2	3	2	1.003	0.963	0.943	1.011	1.021	1.067	1.025	0.0356239	0.55848
768930	NP_001289106.1	40S ribosomal protein S28 [Gallus gallus]	7.8409	46.4	3	11	3	0.993	1.076	0.969	0.999	1.016	1.012	1.037	0.0524159	0.25282
771022	NP_001289121.1	small VCP/p97-interacting protein [Gallus gallus]	8.7901	48.8	4	7	4	1.11	0.85	1.201	0.807	1.206	0.825	0.706	-0.50226	0.00035683
100859352	NP_001289124.1	mitochondrial import inner membrane translocase subunit Tim13 [Gallus gallus]	10.958	49.5	4	5	4	0.965	1.063	1	1.02	0.973	0.99	1.046	0.0648829	0.127638
425202	NP_001289130.1	mitochondrial import inner membrane translocase subunit Tim10 [Gallus gallus]	10.271	38.9	4	5	4	1.023	1.008	0.999	0.982	0.933	1.046	1.027	0.0384362	0.45372
395275	NP_001290382.1	centromere/kinetochore protein zw10 homolog [Gallus gallus]	88.564	22.3	16	21	16	0.951	1.066	0.977	1.032	0.947	1.008	1.08	0.111031	0.0151822
427955	NP_001291983.1	neuromodulin [Gallus gallus]	25.631	15	2	2	2	1.096	1.093	1.044	0.965	0.939	0.88	0.954	-0.0679388	0.56396
420798	NP_001291985.1	pachytene checkpoint protein 2 homolog [Gallus gallus]	49.079	12.7	5	5	5	0.938	0.947	1.116	0.915	1.104	0.993	0.904	-0.145605	0.182263
768680	NP_001291993.1	protein CREG1 precursor [Gallus gallus]	21.106	10.9	2	3	2	1.157	0.907	1.128	0.9	1.082	0.849	0.789	-0.341903	0.00114472
417575	NP_001291994.1	calfacilitin precursor [Gallus gallus]	28.348	6	2	2	2	1.027	0.973	1.047	0.979	1.015	0.97	0.946	-0.0800879	0.0041958
100857237	NP_001292020.1	macrophage migration inhibitory factor [Gallus gallus]	12.484	44.3	5	32	5	1.04	0.836	1.125	0.853	1.21	0.942	0.78	-0.358454	0.0122175
769021	NP_001292041.1	ethylmalonyl-CoA decarboxylase isoform 3 [Gallus gallus]	19.158	16.4	2	2	2	0.979	1.029	1.072	0.92	1.031	0.979	0.95	-0.0740006	0.28358
424065	NP_001292060.1	tRNA wybutosine-synthesizing protein 5 [Gallus gallus]	37.272	5	2	2	2	1.017	0.971	0.955	1.021	1.059	0.993	0.985	-0.0218044	0.6845
421169	NP_001292069.1	tubulin alpha-8 chain [Gallus gallus]	49.956	54.8	21	91	6	0.983	0.979	0.981	1.027	0.929	1.07	1.063	0.0881416	0.126162
418482	NP_001292090.2	E3 ubiquitin-protein ligase listerin [Gallus gallus]	200	4.2	7	7	7	0.957	1.004	0.989	1.091	0.961	1.008	1.067	0.0935602	0.089564
419533	NP_001292097.1	lysyl oxidase homolog 2 precursor [Gallus gallus]	86.795	25.7	17	25	16	1.027	1.06	0.97	1.016	0.957	0.975	1.033	0.0468403	0.37672
419682	NP_001292117.1	60S ribosomal protein L11 [Gallus gallus]	20.233	40.4	9	15	9	0.982	1.042	0.992	1.052	0.947	0.969	1.049	0.0690147	0.186685
396550	NP_001292129.1	non-specific lipid-transfer protein [Gallus gallus]	57.495	32	19	39	19	1.052	0.955	1.089	0.937	1.016	0.912	0.888	-0.171368	0.0079593
416204	NP_001292138.1	serine/threonine-protein kinase 10 [Gallus gallus]	112.47	1.7	2	2	1
421790	NP_001292140.1	activating signal cointegrator 1 complex subunit 3 [Gallus gallus]	251.85	8.5	16	17	16	0.954	1.001	1.004	1.046	1.011	0.991	1.023	0.0328061	0.40382
429035	NP_001292201.1	tubulin alpha-1 chain [Gallus gallus]	50.15	57.9	23	143	1	1.104	1.027	1.061	1.032	0.958	0.961	0.967	-0.0484122	0.53874
422493	NP_001292327.1	sodium-dependent phosphate transporter 2 [Gallus gallus]	70.574	1.5	1	2	1	1.045	1.009	1.016	0.921	0.984	1.03	0.972	-0.0409718	0.49084
425859	NP_001292367.1	exostosin-2 [Gallus gallus]	82.176	6.5	5	5	5	0.992	1.118	0.952	0.98	0.983	0.985	1.053	0.0745054	0.32582
415353	NP_001292399.1	electron transfer flavoprotein subunit alpha, mitochondrial [Gallus gallus]	35.365	50	12	33	12	1.012	0.997	1.01	1.013	0.973	0.988	1.001	0.00144197	0.9435
425111	NP_001292487.1	retinoblastoma-like protein 2 [Gallus gallus]	118.43	5.4	4	4	4	0.96	1.134	1.045	1.004	0.89	0.973	1.075	0.104337	0.33598
424359	NP_001292544.1	ubiquitin carboxyl-terminal hydrolase isozyme L5 [Gallus gallus]	37.847	69.8	18	23	18	0.978	1.035	0.968	1.052	0.963	0.989	1.057	0.0799754	0.04338
776286	NP_001292573.1	ubiquitin-protein ligase E3B [Gallus gallus]	122.81	0.9	1	1	1
417110	NP_001292602.1	ribosome-recycling factor, mitochondrial [Gallus gallus]	28.567	4.2	1	1	1	1.04	0.965	0.897	0.991	1.138	0.989	0.958	-0.0619024	0.637
374226	NP_001295027.1	protein mago nashi homolog [Gallus gallus]	17.96	51.9	7	15	7	1.025	1.05	1.012	0.946	0.963	0.995	0.997	-0.00433459	0.92538
422661	NP_001299607.1	sulfotransferase family, cytosolic, 1B [Gallus gallus]	34.061	17.2	3	3	2
428222	NP_001304141.1	protein argonaute-1 [Gallus gallus]	97.231	15.2	10	11	6	1.023	1.053	0.979	0.957	1.012	0.926	0.974	-0.0380063	0.53614
417565	NP_001304285.1	polymerase delta-interacting protein 2 [Gallus gallus]	42.684	22.8	7	11	7	0.974	1.032	1.013	0.971	1.003	0.996	1.003	0.00432161	0.90038
100859748	NP_001304933.1	sigma non-opioid intracellular receptor 1 isoform 2 [Gallus gallus]	18.306	8.5	1	1	1
770109	NP_001305336.1	pro-cathepsin H precursor [Gallus gallus]	36.403	10	5	6	5	1.021	0.975	1.043	1.004	1.009	0.97	0.96	-0.0588937	0.046422
416420	NP_001305340.1	DNA repair endonuclease XPF [Gallus gallus]	103.08	3.1	2	2	2
769850	NP_001305371.1	ATP-dependent 6-phosphofructokinase, liver type [Gallus gallus]	83.966	19.2	12	16	12	0.95	1.037	0.934	1.047	0.952	1.066	1.111	0.151859	0.00048125
101750392	NP_001305381.1	signal recognition particle receptor subunit beta [Gallus gallus]	28.146	43	9	13	9	0.906	1.019	1.006	1.059	0.956	1.072	1.098	0.134878	0.049357
100859110	NP_001305382.1	synaptogyrin-2 [Gallus gallus]	25.068	11.6	3	4	3	0.959	0.952	1.014	0.992	1.091	1.006	0.963	-0.0543923	0.41866
417401	NP_001305387.1	E3 ubiquitin/ISG15 ligase TRIM25 [Gallus gallus]	71.424	17.1	11	13	11	0.966	0.988	0.941	1.064	0.989	1.03	1.064	0.0894982	0.07424
420180	NP_001305389.1	transient receptor potential cation channel subfamily A member 1 [Gallus gallus]	127.21	1	1	1	1	0.866	0.887	1.053	1.175	0.966	1.059	1.082	0.1137	0.4928
772299	NP_001305390.1	putative E3 ubiquitin-protein ligase UBR7 [Gallus gallus]	47.08	2.2	1	1	1
100858231	NP_001305391.1	regulator of nonsense transcripts 3B [Gallus gallus]	56.927	12.3	5	6	5	0.976	1.011	0.944	0.953	1.035	0.992	1	0	0.98216
770780	NP_001305394.1	postacrosomal sheath WW domain-binding protein [Gallus gallus]	32.709	10.1	2	3	2	1.115	0.931	0.95	0.893	1.144	0.984	0.875	-0.192645	0.112458
100858635	NP_001305914.1	four-jointed box protein 1 precursor [Gallus gallus]	42.204	2.1	1	1	1	0.961	0.9	1.056	1.06	0.95	1.074	1.023	0.0328061	0.7738
100858655	NP_001305921.1	interleukin enhancer-binding factor 3 [Gallus gallus]	95.017	28.6	22	37	22	1.03	1.059	1.014	1.003	0.97	0.959	1.002	0.00288251	0.95974
100858986	NP_001305952.1	prolactin regulatory element-binding protein [Gallus gallus]	44.305	26.3	8	8	8	0.979	1.063	1.026	0.98	0.908	0.996	1.043	0.0607392	0.37804
769360	NP_001305959.1	transmembrane emp24 domain-containing protein 7 precursor [Gallus gallus]	24.794	37.9	8	13	8	1.01	0.98	1.056	0.959	1.014	0.995	0.953	-0.0694519	0.052823
101751828	NP_001305960.1	mRNA decay activator protein ZFP36L1 [Gallus gallus]	36.02	9	3	3	2	0.661	1.34	0.662	1.51	0.639	1.181	2.055	1.03914	0.00057663
107052930	NP_001305961.1	mRNA decay activator protein ZFP36L2 [Gallus gallus]	50.549	5.7	2	2	1	0.842	1.094	0.866	1.118	0.86	1.21	1.333	0.414677	0.00084019
373963	NP_001308445.1	elongation factor 1-alpha 1 [Gallus gallus]	50.156	43.9	24	103	24	0.979	0.98	0.97	1.003	1.015	1.042	1.021	0.0299829	0.42124
419014	NP_001308483.1	dipeptidyl peptidase 1 precursor [Gallus gallus]	51.79	35	14	39	14	0.996	0.992	1.022	1.015	0.996	1	0.998	-0.00288828	0.84348
418401	NP_001308526.1	60S ribosomal protein L24 [Gallus gallus]	17.791	51.6	12	28	12	0.851	1.098	0.947	1.104	0.914	1.059	1.202	0.265437	0.0055415
418540	NP_001308527.1	tRNA (guanine-N(7)-)-methyltransferase non-catalytic subunit WDR4 [Gallus gallus]	46.9	6.2	2	2	2	0.987	0.92	0.905	1	1.055	1.137	1.037	0.0524159	0.67058
420001	NP_001308528.1	60S ribosomal protein L23 [Gallus gallus]	14.865	55.7	7	23	7	0.946	1.056	0.93	1.086	0.918	1.03	1.135	0.182692	0.00196438
421027	NP_001308536.1	protein disulfide-isomerase TMX3 isoform 2 [Gallus gallus]	53.972	15.1	7	16	7	0.966	1.013	1.011	0.996	0.956	1.046	1.042	0.0593553	0.142182
420236	NP_001313423.1	cytochrome b-c1 complex subunit 7 [Gallus gallus]	13.499	41.4	4	6	4	0.867	1.077	0.927	1.137	0.885	1.106	1.239	0.309176	0.00104337
420013	NP_001315283.1	putative protein PTGES3L [Gallus gallus]	17.615	19	2	2	2	0.99	0.899	0.99	1.077	1.071	0.989	0.972	-0.0409718	0.62778
416754	NP_001332924.1	N-acetylglucosamine-6-phosphate deacetylase [Gallus gallus]	44.294	6.8	2	4	2	0.989	0.842	1.105	0.973	1.113	0.992	0.875	-0.192645	0.104864
374056	NP_001333377.1	phospholipid hydroperoxide glutathione peroxidase isoform C [Gallus gallus]	21.62	33	6	8	6	1.105	0.887	1.008	0.919	1.195	0.909	0.821	-0.284546	0.0177972
378790	NP_001335216.1	reticulon-4 isoform 1 [Gallus gallus]	127	10.5	9	19	9	1.073	0.965	1.087	1.006	1.004	0.928	0.916	-0.12658	0.061344
427630	NP_001336637.1	probable ATP-dependent RNA helicase DDX41 [Gallus gallus]	69.21	9.4	5	6	5	0.916	1.035	0.927	1.127	0.929	1.07	1.166	0.221568	0.0037017
770103	NP_001338968.1	tropomyosin alpha-3 chain isoform b [Gallus gallus]	29.022	62.5	26	104	0
107054794	NP_001340868.1	adapter molecule crk [Gallus gallus]	33.805	34.4	9	14	9	1.043	0.903	1.007	0.995	1.075	0.962	0.915	-0.128156	0.059478
424485	NP_001341600.1	calponin-3 [Gallus gallus]	36.61	36	10	20	9	0.897	1.038	0.902	1.089	0.908	1.089	1.188	0.248535	0.00046176
420700	NP_001344436.1	phosphatidylinositide phosphatase SAC1 isoform 1 [Gallus gallus]	67.45	29.8	19	30	19	1.014	0.977	1.039	0.968	1.041	0.983	0.946	-0.0800879	0.0045042
373888	NP_989431.1	transcription factor A, mitochondrial [Gallus gallus]	29.986	27.5	7	8	7	0.992	1.085	1.041	0.992	0.917	0.965	1.031	0.0440443	0.57956
373898	NP_989440.2	paladin [Gallus gallus]	99.792	4.8	3	3	3
373899	NP_989441.1	protein disulfide-isomerase A3 precursor [Gallus gallus]	56.181	71.1	38	120	38	1	1.028	0.984	1.018	0.983	0.993	1.024	0.0342157	0.110836
373900	NP_989442.2	UTP--glucose-1-phosphate uridylyltransferase [Gallus gallus]	56.834	49	26	57	26	0.743	1.173	0.696	1.346	0.72	1.289	1.764	0.818851	0.00022269
373904	NP_989446.2	tumor necrosis factor receptor superfamily member 10B precursor [Gallus gallus]	41.531	9.2	3	4	3
373908	NP_989450.1	endothelin-1 receptor precursor [Gallus gallus]	47.713	2.4	1	1	1	0.936	0.761	1.075	1.151	1.032	1.053	0.974	-0.0380063	0.78006
373914	NP_989456.1	sulfhydryl oxidase 1 precursor [Gallus gallus]	83.078	6.3	4	7	4	0.965	1.057	0.926	1.086	0.885	1.074	1.159	0.212881	0.0048375
373930	NP_989466.1	small ubiquitin-related modifier 1 precursor [Gallus gallus]	11.557	24.8	3	4	3	0.911	0.98	1.049	0.948	1.013	1.099	1.018	0.0257376	0.78776
373937	NP_989472.1	60S ribosomal protein L22 [Gallus gallus]	14.729	28.1	3	5	3	1.008	1.019	0.985	0.965	0.981	1.023	1.011	0.015783	0.62996
373938	NP_989473.1	guanine nucleotide exchange factor VAV2 [Gallus gallus]	97.5	8.7	7	8	7	0.88	1.034	0.875	1.17	0.967	1.11	1.217	0.283329	0.0152208
373946	NP_989477.1	integrin alpha-3 precursor [Gallus gallus]	113.77	15.4	15	21	15	1.144	0.844	1.167	0.81	1.197	0.856	0.716	-0.481969	9.6277e-05
373948	NP_989478.1	matrin-3 [Gallus gallus]	100.71	34	29	49	29	1.016	0.986	0.989	1.028	0.962	1.015	1.021	0.0299829	0.35802
373951	NP_989479.1	protein S100-A6 [Gallus gallus]	10.276	35.9	5	18	5	1.051	0.798	0.999	0.91	1.208	0.983	0.826	-0.275786	0.082777
373957	NP_989483.1	60S ribosomal protein L6 [Gallus gallus]	33.923	29.5	15	27	15	1.001	1.041	0.994	0.997	1.005	1.014	1.017	0.0243197	0.25926
373961	NP_989487.1	histone deacetylase 1 [Gallus gallus]	54.938	24.4	9	15	6	0.963	1.094	0.968	1.011	0.89	1.012	1.105	0.144046	0.057155
373965	NP_989489.1	caldesmon [Gallus gallus]	86.962	33.2	27	45	27	1.02	0.987	1.003	0.975	0.999	0.998	0.979	-0.0306192	0.088982
373978	NP_989495.1	collagen alpha-1(XVIII) chain precursor [Gallus gallus]	137.4	2.5	3	3	3	1.024	0.955	1.305	0.734	1.153	0.847	0.728	-0.45799	0.037122
373980	NP_989497.2	laminin subunit beta-1 variant precursor [Gallus gallus]	195.34	5.4	7	7	5	0.972	1.022	0.981	1.02	0.97	1	1.041	0.0579701	0.0068221
373984	NP_989501.1	proliferating cell nuclear antigen [Gallus gallus]	28.888	46.9	10	22	10	0.978	1.038	0.943	1.002	0.984	1.092	1.078	0.108357	0.057285
373997	NP_989508.1	L-lactate dehydrogenase B chain [Gallus gallus]	36.318	29.7	11	31	11	0.891	1.057	0.795	1.16	0.889	1.208	1.33	0.411426	0.0064049
374009	NP_989519.1	aconitate hydratase, mitochondrial [Gallus gallus]	85.79	44.2	31	62	31	0.979	1.012	1.042	0.998	0.982	0.966	0.991	-0.013043	0.7378
374010	NP_989520.1	uracil-DNA glycosylase [Gallus gallus]	33.899	3.7	1	1	1
374018	NP_989525.1	integrin-linked protein kinase [Gallus gallus]	51.518	32.5	15	32	15	1.04	0.954	0.981	0.984	1.051	0.998	0.956	-0.0649175	0.149125
374020	NP_989527.1	ferrochelatase, mitochondrial precursor [Gallus gallus]	45.429	24.1	9	11	9	0.941	1.034	0.938	1.057	0.921	1.048	1.121	0.164786	0.00024394
374024	NP_989529.1	twisted gastrulation protein homolog 1 precursor [Gallus gallus]	24.903	4.5	1	1	1
374030	NP_989534.1	pterin-4-alpha-carbinolamine dehydratase 2 [Gallus gallus]	11.768	24.3	3	4	2
374037	NP_989538.1	histone acetyltransferase type B catalytic subunit [Gallus gallus]	47.968	14.7	4	5	4	1.059	1.017	0.945	0.931	1.027	1.027	0.982	-0.0262051	0.70966
374040	NP_989541.1	protein diaphanous homolog 2 [Gallus gallus]	139.26	14.7	17	21	17	1.002	0.975	1.049	1.006	1.023	0.985	0.965	-0.0513992	0.091621
374042	NP_989542.1	superoxide dismutase [Mn], mitochondrial precursor [Gallus gallus]	24.946	11.6	4	10	4	1.061	0.971	1.051	0.93	1.071	0.971	0.902	-0.148801	0.0025822
374044	NP_989543.1	hexokinase-2 [Gallus gallus]	102.42	37.1	32	53	29	0.865	1.113	0.88	1.14	0.863	1.145	1.303	0.381837	1.80768e-05
374050	NP_989547.1	DNA damage-binding protein 1 [Gallus gallus]	126.95	29.5	32	48	32	1.004	1.01	0.984	1	1.001	1.01	1.01	0.0143553	0.21834
374053	NP_989548.1	40S ribosomal protein S17 [Gallus gallus]	15.538	60	9	28	9	1.009	1.03	0.967	0.981	0.996	1.061	1.034	0.0482362	0.2779
374065	NP_989555.1	calcium-activated potassium channel subunit alpha-1 [Gallus gallus]	127.67	3.1	2	2	2	1.031	0.997	1.07	1.011	0.972	0.933	0.957	-0.0634092	0.30672
374066	NP_989556.1	D-erythrulose reductase [Gallus gallus]	26.167	24	6	7	6	1.003	0.977	0.969	0.996	1.007	1.042	1.012	0.0172093	0.6302
374071	NP_989561.1	KH domain-containing, RNA-binding, signal transduction-associated protein 1 [Gallus gallus]	46.504	9.2	4	4	4
374072	NP_989562.2	ADP/ATP translocase 3 [Gallus gallus]	32.748	53	18	34	6	0.996	0.95	0.998	1.039	1.028	1.021	0.996	-0.00578235	0.88218
374077	NP_989565.1	guanine nucleotide-binding protein subunit alpha-11 [Gallus gallus]	42.058	33.7	11	17	7	1.026	0.915	1.046	0.953	0.985	0.988	0.934	-0.0985055	0.074117
374079	NP_989567.1	optineurin [Gallus gallus]	64.087	9.5	5	6	5	0.899	1.02	1.036	0.987	1.022	1.072	1.041	0.0579701	0.45922
374087	NP_989571.1	double-stranded RNA-specific editase 1 [Gallus gallus]	76.659	12	5	6	5	0.998	0.901	1.176	0.874	1.036	0.93	0.843	-0.246395	0.032882
374094	NP_989577.1	TGF-beta receptor type-1 precursor [Gallus gallus]	56.508	12.9	4	5	4	1.037	0.988	1	1.03	0.992	1.03	1.006	0.00863031	0.76426
374097	NP_989580.1	guanine nucleotide-binding protein G(k) subunit alpha [Gallus gallus]	40.4	22.6	8	17	5	0.949	0.948	0.997	0.977	1.045	1.025	0.986	-0.0203404	0.72528
374111	NP_989591.2	CUGBP Elav-like family member 2 [Gallus gallus]	52.012	9	4	7	1	0.902	0.942	1.024	1.057	1.027	1.055	1.034	0.0482362	0.58468
374113	NP_989592.2	disintegrin and metalloproteinase domain-containing protein 10 precursor [Gallus gallus]	84.611	5.7	4	4	4
374118	NP_989595.1	suppressor of fused homolog [Gallus gallus]	53.748	7	2	2	2	0.879	0.839	1.049	1.184	0.978	1.077	1.067	0.0935602	0.64596
374133	NP_989604.1	60S ribosomal protein L35 [Gallus gallus]	14.551	26	4	13	4	0.966	1.021	0.963	1.096	0.924	1.04	1.107	0.146655	0.0169175
374135	NP_989605.1	connective tissue growth factor precursor [Gallus gallus]	37.499	30.5	9	10	9	1.251	0.77	1.3	0.692	1.258	0.763	0.584	-0.77596	0.000119551
374159	NP_989617.2	ATP synthase subunit alpha, mitochondrial [Gallus gallus]	60.102	49.2	27	66	2	0.931	1.014	1.092	1.04	1.002	0.937	0.989	-0.0159576	0.8644
374163	NP_989620.1	endoplasmin precursor [Gallus gallus]	91.554	51.1	40	142	38	0.961	1.052	0.974	1.056	0.947	1.025	1.087	0.120352	0.002535
417584	NP_989627.1	ARF GTPase-activating protein GIT1 [Gallus gallus]	82.32	11.5	7	9	6	1.005	1.001	0.993	0.951	1.021	0.974	0.969	-0.0454314	0.135462
374178	NP_989629.1	metalloproteinase inhibitor 2 precursor [Gallus gallus]	24.313	20.5	4	4	4	1.09	0.957	1.029	0.934	1.063	0.943	0.891	-0.166503	0.0030957
374186	NP_989632.1	ubiquitin recognition factor in ER-associated degradation protein 1 [Gallus gallus]	34.562	28.7	8	12	8	0.991	0.972	0.993	0.989	1.004	1.041	1.005	0.0071955	0.84886
374189	NP_989634.1	NADP-dependent malic enzyme [Gallus gallus]	62	37	21	48	19	1.065	0.911	1.019	0.933	1.107	0.957	0.878	-0.187707	0.0095203
374193	NP_989636.1	glyceraldehyde-3-phosphate dehydrogenase [Gallus gallus]	35.704	70.3	22	188	20	1.001	0.977	0.973	1.03	1.029	1.027	1.01	0.0143553	0.68622
374197	NP_989638.1	actin-related protein 3 [Gallus gallus]	47.421	45.9	17	50	17	1.017	0.967	0.996	0.974	1.044	0.99	0.959	-0.0603973	0.051684
374206	NP_989643.1	histone deacetylase complex subunit SAP18 [Gallus gallus]	17.605	35.3	7	10	7	1.009	0.982	0.996	1.07	0.981	0.989	1.018	0.0257376	0.57352
374209	NP_989646.1	integrin beta-3 precursor [Gallus gallus]	86.115	30.5	19	29	19	0.75	1.263	0.786	1.299	0.681	1.229	1.71	0.773996	0.00028196
374236	NP_989662.1	zinc finger protein ubi-d4 [Gallus gallus]	45.883	13.1	5	6	4	0.993	0.937	1.086	1.07	0.984	0.932	0.96	-0.0588937	0.48416
374241	NP_989665.1	peptidase inhibitor 15 precursor [Gallus gallus]	29.238	7	1	1	1	0.975	1.005	0.934	1.015	1.025	1.054	1.048	0.0676387	0.197561
374251	NP_989670.1	transforming growth factor beta receptor type 3 precursor [Gallus gallus]	93.312	2.6	2	3	2	1.184	0.812	1.192	0.77	1.197	0.868	0.686	-0.54372	0.0083443
374263	NP_989677.1	pyruvate carboxylase, mitochondrial [Gallus gallus]	127.14	38.5	34	50	34	1.002	1.007	0.992	1.038	0.976	1.019	1.032	0.045443	0.056081
374271	NP_989684.1	insulin-like growth factor-binding protein 4 precursor [Gallus gallus]	27.726	18.1	4	4	4	0.956	1.002	0.957	1.07	0.896	0.993	1.091	0.125651	0.053143
374273	NP_989686.1	surfeit locus protein 4 [Gallus gallus]	30.619	21.6	5	12	5	0.98	1.003	1.086	1.071	0.968	0.977	1.006	0.00863031	0.89862
378793	NP_989699.1	tRNA (guanine(10)-N2)-methyltransferase homolog [Gallus gallus]	52.953	2.8	2	2	2	0.955	0.799	0.692	0.977	1.869	0.785	0.728	-0.45799	0.48092
378795	NP_989700.1	high mobility group protein HMG-I/HMG-Y [Gallus gallus]	10.429	39.6	3	3	3	0.947	0.956	1.017	1.097	0.885	1.095	1.105	0.144046	0.17706
378804	NP_989707.1	calcineurin subunit B type 1 [Gallus gallus]	19.3	51.2	6	11	6	0.992	0.996	0.948	1.002	1.014	1.005	1.017	0.0243197	0.48838
378897	NP_989712.2	thy-1 membrane glycoprotein precursor [Gallus gallus]	18.173	32.3	4	18	4	1.053	0.966	1.084	0.909	1.055	0.926	0.878	-0.187707	0.0029758
378898	NP_989713.1	N(G),N(G)-dimethylarginine dimethylaminohydrolase 1 [Gallus gallus]	31.238	35.9	8	13	3	1.013	0.923	1.022	0.892	1.087	1.037	0.914	-0.129734	0.143576
378900	NP_989715.1	transcription factor CP2 [Gallus gallus]	56.472	9.7	3	3	3	0.99	1.092	0.973	0.99	0.901	1.055	1.095	0.130931	0.089317
378909	NP_989723.1	glycogen phosphorylase, liver form [Gallus gallus]	98.564	34.5	27	33	22	1.021	0.971	1.016	0.945	1.046	0.988	0.942	-0.086201	0.0191168
378914	NP_989727.1	cyclin-dependent kinase inhibitor 1 [Gallus gallus]	15.819	11.3	1	1	1	0.97	1.156	0.867	1.091	1.007	0.931	1.117	0.159629	0.23906
378915	NP_989728.1	proteasome subunit beta type-7 [Gallus gallus]	29.876	16.2	5	9	5	0.992	1.029	0.938	1.017	0.963	1.032	1.064	0.0894982	0.020662
378921	NP_989733.2	receptor-interacting serine/threonine-protein kinase 1 [Gallus gallus]	75.081	24.9	11	12	11	0.91	1.004	0.966	1.042	0.985	1.077	1.092	0.126973	0.048521
386571	NP_989741.1	SPARC precursor [Gallus gallus]	34.06	25.5	7	18	7	0.993	1.028	0.983	1.007	0.964	0.999	1.032	0.045443	0.06106
386574	NP_989744.1	nuclear factor NF-kappa-B p100 subunit [Gallus gallus]	99.401	7.5	6	6	5	0.678	1.275	0.706	1.372	0.67	1.306	1.925	0.944858	1.83077e-05
386582	NP_989750.1	retinoblastoma-associated protein [Gallus gallus]	104.43	2.3	1	1	1
386583	NP_989751.1	72 kDa type IV collagenase preproprotein [Gallus gallus]	74.94	49.5	27	44	27	1.143	0.995	1.095	0.846	1.063	0.878	0.824	-0.279284	0.0214
386585	NP_989752.1	COUP transcription factor 2 [Gallus gallus]	45.427	13.4	5	5	4	1.228	0.81	1.231	0.793	1.172	0.804	0.663	-0.592919	1.89901e-05
386747	NP_989754.1	formin [Gallus gallus]	135.24	2.7	2	2	2	0.983	0.965	1.007	0.875	1.16	1.023	0.909	-0.137648	0.2404
395070	NP_989758.1	GDP-fucose protein O-fucosyltransferase 1 precursor [Gallus gallus]	43.315	40.3	13	22	13	0.979	1.032	0.955	1.032	0.971	1.053	1.073	0.10165	0.0020782
395071	NP_989759.1	alpha-(1,3)-fucosyltransferase 11 precursor [Gallus gallus]	57.515	8.9	4	4	4	1.005	1.068	0.997	1	0.92	1.016	1.055	0.077243	0.190116
395074	NP_989762.1	coiled-coil domain-containing protein 80 precursor [Gallus gallus]	109.32	11.6	9	10	9	1.121	0.849	1.215	0.831	1.225	0.798	0.696	-0.522841	0.00042095
395076	NP_989764.1	cyclin-dependent kinase 4 inhibitor B [Gallus gallus]	14.504	43.2	5	5	5	0.925	0.999	0.912	1.049	0.971	1.142	1.136	0.183963	0.043743
395103	NP_989783.1	low density lipoprotein receptor precursor [Gallus gallus]	93.986	1.5	1	1	1
395109	NP_989789.1	raftlin [Gallus gallus]	65.695	15	8	10	7	1.123	0.992	1.087	0.9	1.055	0.946	0.869	-0.202572	0.0135646
395123	NP_989800.1	AH receptor-interacting protein [Gallus gallus]	37.509	23.5	7	7	7	0.958	0.94	0.948	1.041	1.029	1.09	1.046	0.0648829	0.43436
395124	NP_989801.2	cyclin-L1 [Gallus gallus]	59.83	2.8	1	2	1	0.934	1.009	0.925	0.976	1.153	1.02	0.998	-0.00288828	0.97148
395132	NP_989806.1	mothers against decapentaplegic homolog 3 [Gallus gallus]	48.251	12.4	5	6	1
395140	NP_989812.1	heparan sulfate 2-O-sulfotransferase 1 [Gallus gallus]	41.701	10.4	3	3	3	1.11	0.911	0.991	0.959	1.025	1.014	0.923	-0.115597	0.153242
395142	NP_989814.1	integrin beta-5 precursor [Gallus gallus]	88.476	27.2	19	29	19	1.062	0.912	1.101	0.914	1.028	0.914	0.859	-0.21927	0.0165974
395157	NP_989827.1	heterogeneous nuclear ribonucleoprotein H [Gallus gallus]	56.566	39.1	17	56	16	1.008	1.048	1	1.038	0.96	1.003	1.041	0.0579701	0.117981
395171	NP_989837.1	dual serine/threonine and tyrosine protein kinase [Gallus gallus]	105.41	1	1	1	1
395185	NP_989845.2	solute carrier family 35 member B1 [Gallus gallus]	35.751	3.7	1	1	1
395188	NP_989848.1	structural maintenance of chromosomes protein 3 [Gallus gallus]	141.57	30.3	32	38	32	1.016	0.993	1.018	1.022	0.989	0.98	0.991	-0.013043	0.57816
395196	NP_989855.1	interleukin-1 beta [Gallus gallus]	29.822	3.7	1	1	1	0.602	1.46	0.729	1.299	0.675	1.221	1.984	0.988412	0.00085737
395204	NP_989862.1	pericentriolar material 1 protein [Gallus gallus]	212.72	1.7	3	4	3	0.983	0.992	1.048	1.038	0.852	1.083	1.08	0.111031	0.29468
395227	NP_989876.1	sulfotransferase family cytosolic 1B member 1 [Gallus gallus]	34.073	11.8	3	4	2	0.981	0.921	1.042	1.038	1.03	1.001	0.97	-0.0439433	0.46994
395233	NP_989881.1	dual specificity tyrosine-phosphorylation-regulated kinase 1A [Gallus gallus]	84.96	2.1	2	2	2
395249	NP_989894.1	ATP-dependent RNA helicase DDX1 [Gallus gallus]	82.483	34.7	23	42	23	1.008	1.024	0.96	1.032	0.993	1.01	1.035	0.0496308	0.090218
395257	NP_989901.2	core-binding factor subunit beta [Gallus gallus]	21.548	11	2	2	2
395260	NP_989904.1	filamin-C [Gallus gallus]	280.49	19.8	39	56	27	0.965	0.978	1.008	1.022	1.001	1.004	1.01	0.0143553	0.61758
395261	NP_989905.1	filamin-A [Gallus gallus]	272.95	48.5	111	239	104	1.002	0.995	0.976	0.991	1.038	1.007	0.992	-0.011588	0.71078
395263	NP_989907.1	acyl-CoA-binding protein [Gallus gallus]	9.8051	40.2	4	8	4	0.965	0.897	0.927	0.999	1.152	1.1	0.984	-0.0232698	0.87588
395266	NP_989909.2	carboxypeptidase Z precursor [Gallus gallus]	73.839	1.9	1	1	1	0.953	1.128	1.041	0.843	1.052	0.992	0.973	-0.0394883	0.72678
395269	NP_989912.1	60S ribosomal protein L5 [Gallus gallus]	34.091	50.5	17	66	17	0.974	1.003	0.959	1.007	1.015	1.054	1.039	0.0551957	0.171763
395278	NP_989917.1	gap junction alpha-1 protein [Gallus gallus]	43.125	19.7	6	10	6	0.721	1.221	0.826	1.236	0.814	1.132	1.52	0.604071	0.00119834
395283	NP_989922.1	TNF-related apoptosis inducing ligand-like protein precursor [Gallus gallus]	32.092	6.6	2	3	2	1.136	0.941	1.171	0.885	0.989	0.891	0.824	-0.279284	0.026303
395284	NP_989923.1	caspase-8 [Gallus gallus]	54.645	18.5	8	10	8	0.94	0.982	0.971	1.052	0.996	1.063	1.065	0.0908534	0.103579
395295	NP_989928.1	eukaryotic translation initiation factor 2 subunit 2 [Gallus gallus]	38.436	38.3	12	29	12	1.017	1.002	0.987	1.048	0.938	0.978	1.029	0.041243	0.40452
395298	NP_989930.1	small nuclear ribonucleoprotein-associated protein B' [Gallus gallus]	24.588	20.8	6	11	6	0.974	1.033	0.963	1.006	1.023	0.98	1.02	0.0285692	0.45434
395318	NP_989944.1	proteasome subunit alpha type-7 [Gallus gallus]	28.072	54.6	14	23	14	0.99	1.022	0.956	0.992	0.97	1.024	1.042	0.0593553	0.046864
395332	NP_989954.1	testin [Gallus gallus]	47.983	50.7	22	42	22	1.004	0.93	1.076	0.944	1.071	0.963	0.9	-0.152003	0.0130165
395336	NP_989958.1	tyrosine-protein kinase receptor TYRO3 precursor [Gallus gallus]	96.401	3.1	2	2	2
395337	NP_989959.1	interleukin-6 precursor [Gallus gallus]	26.79	25.3	7	8	7	0.413	1.625	0.414	1.739	0.36	1.494	4.093	2.03316	2.2379e-05
395338	NP_989960.1	aldo-keto reductase family 1 member B10 [Gallus gallus]	36.472	52.4	18	45	17	1.133	0.816	1.06	0.855	1.177	0.97	0.784	-0.351074	0.0149634
395347	NP_989967.1	matrix remodeling-associated protein 8 precursor [Gallus gallus]	50.703	23.1	11	14	11	1.227	0.725	1.283	0.769	1.279	0.782	0.601	-0.734563	4.3422e-05
395348	NP_989968.1	actin-related protein 6 [Gallus gallus]	45.784	5.6	2	4	2
395349	NP_989969.2	follistatin-related protein 1 precursor [Gallus gallus]	35.811	25.4	8	9	8	1.127	0.875	1.169	0.813	1.145	0.835	0.733	-0.448115	0.00020188
395353	NP_989972.1	peptidyl-prolyl cis-trans isomerase FKBP3 [Gallus gallus]	25.031	42.7	8	15	8	1.04	1.057	0.959	0.993	0.943	0.997	1.036	0.051024	0.38304
395356	NP_989975.1	multiple inositol polyphosphate phosphatase 1 precursor [Gallus gallus]	50.258	29.8	12	20	12	0.986	1.002	1.026	1.001	1	1.004	0.998	-0.00288828	0.90794
395365	NP_989982.1	proteasomal ubiquitin receptor ADRM1 precursor [Gallus gallus]	42.367	17.2	9	17	9	0.965	1.059	0.991	0.994	0.993	0.994	1.033	0.0468403	0.23322
395370	NP_989986.2	splicing factor U2AF 35 kDa subunit [Gallus gallus]	27.701	26.2	5	10	5	0.998	0.992	0.998	0.996	0.968	1.028	1.018	0.0257376	0.31652
395374	NP_989987.1	lipoamide acyltransferase component of branched-chain alpha-keto acid dehydrogenase complex, mitochondrial precursor [Gallus gallus]	53.998	14.2	6	7	6	1.043	0.948	1.025	0.986	1.047	0.966	0.931	-0.103147	0.0054413
395375	NP_989988.1	2-oxoisovalerate dehydrogenase subunit beta, mitochondrial precursor [Gallus gallus]	42.745	8.2	2	3	2	0.976	1.046	0.855	1.148	0.934	1.049	1.173	0.230203	0.031844
395376	NP_989989.2	DNA-dependent protein kinase catalytic subunit [Gallus gallus]	472.65	1.9	7	8	6	0.946	1.019	1.024	0.915	1.052	1.051	0.988	-0.0174171	0.81662
395383	NP_989994.1	monocarboxylate transporter 4 [Gallus gallus]	51.041	14.4	6	10	6	1.101	1.032	1.111	0.906	1.026	0.914	0.881	-0.182786	0.059065
395384	NP_989995.1	complement component 4 binding protein, alpha chain precursor [Gallus gallus]	48.723	14.9	5	6	5	1.079	0.92	1.07	1.01	0.902	0.979	0.953	-0.0694519	0.52322
395385	NP_989996.1	tumor necrosis factor receptor superfamily member 5 precursor [Gallus gallus]	30.009	15.6	2	3	2	0.858	1.061	0.995	1.116	0.912	1.061	1.171	0.227741	0.025944
395387	NP_989998.1	matrix metalloproteinase-9 precursor [Gallus gallus]	76.679	3.2	2	3	2	0.706	1.261	0.791	1.212	0.704	1.303	1.716	0.77905	0.00024266
395389	NP_990000.1	aldehyde dehydrogenase family 1 member A3 [Gallus gallus]	56.311	15.2	6	7	5	0.516	1.291	0.594	1.531	0.442	1.538	2.809	1.49006	0.00054357
395390	NP_990001.1	histone-binding protein RBBP7 [Gallus gallus]	47.702	17.9	7	14	1	1.021	0.986	0.995	0.979	0.987	1.038	1	0	0.99156
395411	NP_990011.1	zinc finger and BTB domain-containing protein 7A [Gallus gallus]	59.841	5.1	3	3	3	1.03	1.011	0.973	1.034	0.993	0.972	1.007	0.0100637	0.79172
395424	NP_990020.1	histidine triad nucleotide-binding protein 1 [Gallus gallus]	13.759	17.5	2	2	2	1.321	0.718	0.964	1.069	1.189	0.78	0.739	-0.436354	0.112561
395430	NP_990025.1	hsp90 co-chaperone Cdc37 [Gallus gallus]	45.608	25.7	10	15	10	0.97	1.075	0.91	1.071	0.957	1.028	1.119	0.16221	0.0096039
395445	NP_990037.1	bcl-2-related ovarian killer protein [Gallus gallus]	23.619	10.3	2	2	2	1.008	0.955	1.018	1.047	1.094	0.902	0.931	-0.103147	0.22208
395451	NP_990043.1	C-X-C motif chemokine 14 precursor [Gallus gallus]	11.564	10.2	1	1	1
395468	NP_990051.1	chemokine C-C motif ligand 4 precursor [Gallus gallus]	9.8965	14.6	1	2	1
395481	NP_990061.1	annexin A6 [Gallus gallus]	75.218	45.8	29	74	2	1.009	0.85	1.059	0.927	1.12	1.044	0.885	-0.176251	0.134659
395506	NP_990078.1	histone deacetylase 3 [Gallus gallus]	48.901	4.7	2	3	2	0.921	1.205	0.816	1.105	0.885	1.072	1.29	0.367371	0.007004
395511	NP_990082.1	radixin [Gallus gallus]	68.554	38.9	27	51	17	0.96	1.001	0.97	1.002	1.016	1.031	1.03	0.0426443	0.21126
395527	NP_990093.1	CD9 antigen [Gallus gallus]	24.969	10.7	2	3	2
395528	NP_990094.2	ubiquitin-conjugating enzyme E2 J1 [Gallus gallus]	34.743	10.4	2	2	2	1.034	0.951	1.021	0.976	1.099	0.937	0.908	-0.139236	0.020056
395557	NP_990111.1	tudor-interacting repair regulator protein precursor [Gallus gallus]	33.829	40.3	12	33	12	1.024	0.96	1	0.957	1.054	1.001	0.948	-0.077041	0.063957
395560	NP_990113.1	neuropilin-1 precursor [Gallus gallus]	102.48	15.2	11	12	11	0.815	1.12	0.903	1.177	0.82	1.17	1.366	0.449957	0.00104038
395568	NP_990121.2	collagen alpha-1(V) chain precursor [Gallus gallus]	184.18	21.4	33	46	0
395570	NP_990122.1	DNA topoisomerase 2-alpha [Gallus gallus]	174.99	9.5	15	20	5
395597	NP_990139.1	mitochondrial carrier homolog 2 [Gallus gallus]	33.126	12.7	4	8	4	0.919	1.004	1.052	1.049	0.952	1.006	1.047	0.0662614	0.33574
395599	NP_990140.2	synemin [Gallus gallus]	182.39	5.9	8	10	8	0.906	0.856	1.161	0.842	1.156	0.955	0.823	-0.281036	0.10546
395625	NP_990155.1	ephrin-B2 precursor [Gallus gallus]	36.761	4.5	1	1	1
395626	NP_990156.1	ubiquitin carboxyl-terminal hydrolase isozyme L3 [Gallus gallus]	26.314	32.6	8	14	1	0.95	1.074	0.873	0.905	1.136	1.072	1.031	0.0440443	0.74466
395629	NP_990158.1	probable ATP-dependent RNA helicase DDX5 [Gallus gallus]	66.736	51.3	30	61	19	0.941	1.069	0.942	1.051	0.928	1.06	1.131	0.177599	5.8412e-05
395639	NP_990166.1	protein numb homolog [Gallus gallus]	63.272	14.8	8	9	8	0.985	1.025	0.94	1.027	0.948	1.004	1.064	0.0894982	0.0184027
395643	NP_990170.1	PDZ and LIM domain protein 4 [Gallus gallus]	35.838	47.6	13	15	13	0.948	1.05	0.879	1.076	0.978	1.082	1.144	0.194087	0.0149031
395644	NP_990171.2	ubiquitin carboxyl-terminal hydrolase 15 isoform 1 [Gallus gallus]	112.1	11.7	10	10	10	1.007	0.993	0.912	1.044	0.997	1.076	1.068	0.0949116	0.168875
395652	NP_990178.2	peptidyl-prolyl cis-trans isomerase FKBP9 precursor [Gallus gallus]	64.371	30.2	21	57	20	0.987	1.025	0.996	1.01	0.987	0.991	1.019	0.0271541	0.14304
395653	NP_990179.1	hypoxanthine-guanine phosphoribosyltransferase [Gallus gallus]	24.608	41.3	8	12	7	1.048	0.94	1	0.952	1.122	0.99	0.909	-0.137648	0.062718
395666	NP_990191.2	CD44 antigen precursor [Gallus gallus]	43.191	19.9	8	11	8	0.799	1.194	0.819	1.238	0.768	1.187	1.517	0.601221	5.6725e-05
395667	NP_990192.1	aminopeptidase Ey [Gallus gallus]	108.67	2.8	3	3	3	1.009	1.048	1.003	0.996	0.999	0.958	0.997	-0.00433459	0.90148
395669	NP_990194.1	pleckstrin [Gallus gallus]	40.298	9.3	2	3	2	0.985	1.024	1.089	0.964	0.959	0.986	0.981	-0.027675	0.68682
395672	NP_990196.1	ubiquitin-conjugating enzyme E2 A [Gallus gallus]	17.315	17.8	2	2	2	0.988	1.054	0.922	0.976	0.998	1.067	1.065	0.0908534	0.168264
395684	NP_990202.1	interleukin-6 receptor subunit beta precursor [Gallus gallus]	102.49	0.9	1	1	1
395688	NP_990206.1	tyrosine-protein phosphatase non-receptor type 1 [Gallus gallus]	50.333	30.4	12	15	12	0.81	1.152	0.834	1.118	0.897	1.149	1.346	0.428678	0.00072346
395701	NP_990216.1	ezrin [Gallus gallus]	69.366	31.5	24	44	15	1.008	0.945	1.011	0.937	1.085	1.022	0.936	-0.0954196	0.142404
395702	NP_990217.1	myotrophin [Gallus gallus]	12.886	33.1	3	7	3	1.063	0.83	1.022	0.941	1.211	0.985	0.836	-0.258425	0.069057
395706	NP_990221.1	acyl-CoA desaturase [Gallus gallus]	40.887	15.1	6	14	6	0.417	1.423	0.397	1.728	0.402	1.662	3.958	1.98477	2.1645e-05
395723	NP_990232.2	elongation factor 1-beta [Gallus gallus]	24.718	56.7	13	37	10	0.977	1.066	0.935	1.017	0.991	1.04	1.076	0.105678	0.029885
395762	NP_990254.3	protein phosphatase 1, regulatory (inhibitor) subunit 9B [Gallus gallus]	151.48	20.4	26	32	26	1.104	1.016	0.976	0.944	1.006	0.984	0.954	-0.0679388	0.34088
395767	NP_990258.2	X-ray repair cross-complementing protein 5 precursor [Gallus gallus]	72.317	26.4	14	17	14	1.035	1.093	1.004	0.922	0.97	0.995	1	0	0.97516
395781	NP_990270.1	39S ribosomal protein S30, mitochondrial [Gallus gallus]	51.671	17.6	6	7	6	0.971	1.022	0.978	0.993	0.993	1.02	1.032	0.045443	0.052583
395797	NP_990285.2	ectonucleoside triphosphate diphosphohydrolase 2 precursor [Gallus gallus]	54.727	3.8	1	1	1
395804	NP_990289.1	26S proteasome regulatory subunit 4 [Gallus gallus]	49.203	44.1	19	41	19	0.967	1.02	0.943	1.06	0.985	1.04	1.078	0.108357	0.01122
395808	NP_990293.1	calcium signal-modulating cyclophilin ligand [Gallus gallus]	31.902	4.5	1	1	1	1.069	1.027	0.897	1.188	0.909	0.929	1.094	0.129613	0.39036
395809	NP_990294.1	anion exchange protein 2 [Gallus gallus]	135.29	3.2	2	2	2
395817	NP_990301.1	cation-independent mannose-6-phosphate receptor precursor [Gallus gallus]	275.64	9.4	20	24	20	0.935	1.054	1.013	1.058	0.922	1.034	1.096	0.132248	0.037277
395818	NP_990302.2	cathepsin K precursor [Gallus gallus]	37.405	42.5	11	28	10	1.048	1.037	1.006	0.956	0.987	0.974	0.976	-0.0350469	0.45684
395832	NP_990315.1	paxillin [Gallus gallus]	61.242	43.1	20	28	20	1.082	0.932	1.053	0.882	1.108	0.921	0.843	-0.246395	0.00157671
395833	NP_990316.1	phosphoglycerate kinase [Gallus gallus]	44.716	72.9	29	127	29	1.003	0.932	0.955	1.01	1.046	1.05	0.996	-0.00578235	0.92262
395835	NP_990318.1	60S acidic ribosomal protein P0 [Gallus gallus]	34.285	38.3	12	25	12	1.04	1.032	0.977	1.017	0.932	0.984	1.028	0.0398403	0.45224
395849	NP_990330.1	60S ribosomal protein L13 [Gallus gallus]	24.395	41.7	10	33	10	0.999	1.024	1.004	1.017	0.956	0.997	1.027	0.0384362	0.2043
395853	NP_990334.1	heat shock cognate 71 kDa protein [Gallus gallus]	70.826	61.5	41	167	26	0.982	1.034	0.945	1.032	0.973	1.045	1.073	0.10165	0.0045028
395854	NP_990335.1	rab GDP dissociation inhibitor beta [Gallus gallus]	50.682	54.7	24	58	24	1.021	0.925	1.003	0.974	1.098	1.009	0.931	-0.103147	0.131458
395855	NP_990336.1	calmodulin [Gallus gallus]	16.852	43.6	9	31	0
395863	NP_990342.1	hematopoietic prostaglandin D synthase [Gallus gallus]	22.73	25.6	7	17	7	0.981	0.9	0.928	1.047	1.16	1.074	0.984	-0.0232698	0.87816
395871	NP_990348.1	ras-related C3 botulinum toxin substrate 1 [Gallus gallus]	21.45	44.8	9	20	8	1.066	0.976	1.033	0.925	1.055	0.983	0.914	-0.129734	0.013543
395874	NP_990351.1	proteasome subunit alpha type-1 [Gallus gallus]	28.925	38.8	11	21	11	1.003	1.036	0.964	1.009	0.982	1.04	1.046	0.0648829	0.038757
395880	NP_990355.1	RNA-binding motif, single-stranded-interacting protein 1 [Gallus gallus]	40.624	20.9	7	13	3	1.087	0.982	1.019	0.971	0.998	0.92	0.926	-0.110916	0.077656
395889	NP_990363.1	insulin-like growth factor 1 receptor precursor [Gallus gallus]	154.1	4.5	7	7	7	0.986	0.998	1.058	0.939	1.043	0.987	0.947	-0.0785637	0.130616
395890	NP_990364.2	nestin [Gallus gallus]	193.18	13.4	19	24	19	0.976	1.008	1.007	1.03	0.95	1.004	1.037	0.0524159	0.119897
395897	NP_990367.1	transforming growth factor-beta-induced protein ig-h3 precursor [Gallus gallus]	74.42	37.8	23	47	23	0.943	1.168	0.832	1.16	0.795	1.103	1.335	0.41684	0.0057753
395907	NP_990371.1	protein DGCR6 [Gallus gallus]	23.242	5	1	2	1	0.849	1.049	0.978	0.966	1.093	1.072	1.057	0.0799754	0.49384
395908	NP_990372.1	59 kDa 2'-5'-oligoadenylate synthase-like protein [Gallus gallus]	54.309	1.9	1	1	1	0.926	1.365	1.105	0.989	0.685	0.928	1.208	0.27262	0.35146
395916	NP_990378.1	nucleoside diphosphate kinase [Gallus gallus]	17.288	85.6	12	33	11	1.027	0.947	0.969	0.998	1.068	1.002	0.962	-0.0558912	0.3162
395928	NP_990386.1	RAC-alpha serine/threonine-protein kinase [Gallus gallus]	55.723	19.8	8	10	5	0.976	1.027	0.995	0.995	1.048	1.018	1.007	0.0100637	0.76936
395932	NP_990390.1	transcription activator BRG1 [Gallus gallus]	183.42	8.5	12	14	6	0.983	0.997	0.95	0.943	1.07	1.064	1	0	0.99434
395935	NP_990392.1	vitronectin precursor [Gallus gallus]	51.636	16.8	7	11	7	0.79	0.956	1.049	1.068	0.988	1.07	1.094	0.129613	0.36416
395936	NP_990393.1	alpha-2-macroglobulin receptor-associated protein precursor [Gallus gallus]	40.817	50.9	22	42	22	1.008	1.053	1.023	1.008	0.947	0.976	1.02	0.0285692	0.57516
395938	NP_990395.1	superoxide dismutase [Cu-Zn] [Gallus gallus]	15.703	43.5	6	10	6	1.003	0.953	0.955	0.975	1.059	1.035	0.982	-0.0262051	0.66974
395948	NP_990398.1	10 kDa heat shock protein, mitochondrial [Gallus gallus]	11.083	62.7	8	19	8	1.004	1.027	1.019	1.017	0.958	0.978	1.014	0.0200577	0.59442
395951	NP_990400.1	integrin alpha-1 precursor [Gallus gallus]	130.23	14.7	13	15	13	0.961	1.026	0.931	1.012	0.956	1.084	1.096	0.132248	0.0168447
395953	NP_990402.1	insulin-like growth factor 2 mRNA-binding protein 1 [Gallus gallus]	63.271	23.4	11	15	9	1.019	1.015	0.962	1.016	0.965	1.021	1.036	0.051024	0.197681
395955	NP_990404.1	translin [Gallus gallus]	25.96	38.4	10	15	10	0.955	0.955	1.009	0.983	1.037	1.015	0.984	-0.0232698	0.62454
395958	NP_990406.1	ubiquitin-60S ribosomal protein L40 [Gallus gallus]	14.739	54.7	8	48	4	1.002	0.975	0.981	1.031	0.872	1.118	1.094	0.129613	0.198857
395963	NP_990411.1	calpain-2 catalytic subunit precursor [Gallus gallus]	79.228	35.6	22	50	22	1.004	0.97	0.984	0.976	1.044	1.017	0.977	-0.0335695	0.37238
395968	NP_990415.1	ICOS ligand precursor [Gallus gallus]	33.155	18.2	5	6	5	0.83	1.173	0.882	1.212	0.781	1.118	1.405	0.49057	0.00127941
395970	NP_990417.1	ferritin heavy chain [Gallus gallus]	21.092	33.3	5	6	5	0.938	1.095	1.012	0.9	1.05	1.016	1.004	0.00575927	0.98278
395976	NP_990421.1	glutathione S-transferase 2 [Gallus gallus]	25.893	65.9	14	28	12	0.937	0.924	0.937	1.022	1.092	1.019	1	0	0.9849
395983	NP_990426.1	mitogen-activated protein kinase 9 [Gallus gallus]	44.008	14.4	5	7	5	0.978	0.943	1.042	1.019	1.051	0.981	0.958	-0.0619024	0.25268
395996	NP_990435.1	bleomycin hydrolase [Gallus gallus]	52.69	32.3	14	20	14	1.011	0.984	0.922	1.001	1.021	1.069	1.034	0.0482362	0.4588
395999	NP_990437.2	non-histone chromosomal protein HMG-14B [Gallus gallus]	11.152	13.5	1	1	1
396000	NP_990438.1	collagen alpha-1(VI) chain precursor [Gallus gallus]	107.98	37.3	32	82	32	1.175	0.898	1.097	0.917	1.005	0.937	0.84	-0.251539	0.021099
396001	NP_990439.1	40S ribosomal protein S4 [Gallus gallus]	29.594	49	13	41	13	0.958	1.042	0.973	1.03	0.974	1.034	1.069	0.0962619	0.00045902
396004	NP_990441.1	DNA topoisomerase 1 [Gallus gallus]	90.795	33.7	25	38	25	0.949	1.03	0.938	1.067	0.95	1.076	1.118	0.16092	0.00133563
396019	NP_990453.1	serine/threonine-protein phosphatase PP1-beta catalytic subunit [Gallus gallus]	37.186	41.9	12	32	3	1.006	0.988	1.006	0.999	1.018	0.997	0.985	-0.0218044	0.042763
396021	NP_990455.1	serine/threonine-protein phosphatase 2A catalytic subunit alpha isoform [Gallus gallus]	35.563	49.8	13	25	2	0.934	1.077	0.96	1.031	0.963	1.002	1.089	0.123004	0.0217
396024	NP_990457.1	alpha-actinin-4 [Gallus gallus]	104.21	62.1	55	142	38	1.06	0.977	1.013	0.945	1.047	0.963	0.925	-0.112475	0.0092631
396027	NP_990460.1	transcription factor p65 [Gallus gallus]	60.071	15.1	7	7	7	1.035	0.944	1.02	0.986	1.062	0.986	0.936	-0.0954196	0.023405
396040	NP_990470.1	probable global transcription activator SNF2L2 [Gallus gallus]	178.07	12.8	17	22	11	1.085	1.021	1.06	0.997	0.993	0.915	0.935	-0.0969617	0.185556
396048	NP_990474.1	neurocalcin-delta [Gallus gallus]	22.261	19.2	4	7	1	0.761	1.206	0.773	1.339	0.779	1.14	1.593	0.671746	0.0103989
396060	NP_990485.1	receptor-type tyrosine-protein phosphatase alpha precursor [Gallus gallus]	90.623	10.5	7	11	7
396061	NP_990486.2	fatty acid synthase [Gallus gallus]	274.77	34	71	117	71	0.956	1.013	0.957	1.027	0.998	1.05	1.061	0.0854247	0.02738
396075	NP_990497.1	protein S100-A11 [Gallus gallus]	11.413	40.6	5	21	5	1.021	0.831	1.029	0.945	1.176	1.015	0.865	-0.209228	0.120861
396090	NP_990508.1	cathepsin D precursor [Gallus gallus]	43.298	38.7	13	31	13	1.015	0.968	1.041	1.001	0.992	0.968	0.964	-0.0528949	0.10674
396091	NP_990509.1	bifunctional purine biosynthesis protein PURH [Gallus gallus]	64.414	51.4	27	50	27	0.955	0.99	0.957	1.034	1.017	1.053	1.051	0.0717627	0.147775
396116	NP_990528.2	matrix metalloproteinase-16 [Gallus gallus]	69.845	1.5	1	1	1
396121	NP_990533.1	beta-1,4-galactosyltransferase 1 [Gallus gallus]	40.928	16.3	4	4	4	1.071	1.01	0.997	1	0.978	0.965	0.977	-0.0335695	0.498
396130	NP_990540.1	solute carrier family 2, facilitated glucose transporter member 1 [Gallus gallus]	54.086	6.9	4	4	4	0.963	1.026	0.958	1.079	0.962	1.056	1.096	0.132248	0.024598
396147	NP_990555.1	actin-related protein 2 [Gallus gallus]	44.701	39.1	13	31	13	1.029	0.916	1.027	0.97	1.066	0.993	0.922	-0.117161	0.03868
396148	NP_990556.1	40S ribosomal protein S6 [Gallus gallus]	28.654	35.3	10	26	10	0.951	1.088	0.957	1.039	0.936	1.057	1.12	0.163499	0.00166291
396153	NP_990559.1	ras-related protein Rab-2A [Gallus gallus]	23.521	56.6	11	29	11	1.005	1.019	1.016	0.981	1.033	0.958	0.969	-0.0454314	0.177039
396156	NP_990561.1	structural maintenance of chromosomes protein 2 [Gallus gallus]	134.94	15.3	16	19	16	0.912	1.022	1.005	1.019	1.013	1.021	1.045	0.0635029	0.31276
396170	NP_990573.1	low-density lipoprotein receptor-related protein 1 precursor [Gallus gallus]	507.13	30.8	124	250	121	1.038	0.964	1.047	0.954	1.032	0.953	0.921	-0.118727	0.000121224
396171	NP_990574.1	transcriptional coactivator YAP1 [Gallus gallus]	47.822	21.9	7	7	7	1.057	0.961	1.019	0.997	1.126	0.867	0.882	-0.181149	0.068618
396180	NP_990581.1	small nuclear ribonucleoprotein E [Gallus gallus]	10.803	13	1	2	1	1.085	0.906	0.953	0.981	0.988	1.089	0.983	-0.0247367	0.798
396185	NP_990584.1	CCAAT/enhancer-binding protein beta [Gallus gallus]	35.03	38.1	9	13	9	0.774	1.26	0.74	1.282	0.718	1.212	1.682	0.750178	4.2737e-05
396191	NP_990587.2	transferrin receptor protein 1 [Gallus gallus]	85.644	27.7	20	24	20	0.953	1.013	1.058	1.019	0.945	1.02	1.032	0.045443	0.45686
396193	NP_990589.1	GTP-binding nuclear protein Ran [Gallus gallus]	24.427	38.4	10	21	10	1.003	1.028	1.008	0.986	0.967	1.03	1.022	0.0313952	0.32104
396199	NP_990594.2	poly [ADP-ribose] polymerase 1 [Gallus gallus]	113.14	30.3	29	41	29	1.008	1.007	1.008	1.005	0.994	0.977	0.993	-0.0101344	0.54898
396201	NP_990596.1	nucleolin [Gallus gallus]	75.64	39.5	34	87	34	1.01	1.079	0.984	0.996	0.97	0.991	1.034	0.0482362	0.33026
396203	NP_990598.1	nucleophosmin [Gallus gallus]	32.632	36.7	14	25	14	1.006	1.073	1.022	0.996	0.965	0.957	1.011	0.015783	0.8012
396205	NP_990600.1	nuclear transcription factor Y subunit beta [Gallus gallus]	20.086	11.7	2	2	2	0.991	1.015	1.022	0.975	1.013	0.994	0.986	-0.0203404	0.39648
396210	NP_990604.1	nuclear factor 1 A-type [Gallus gallus]	55.972	11.8	4	5	4	0.972	0.999	0.996	1.04	1.034	0.974	1.004	0.00575927	0.89698
396211	NP_990605.2	myosin-11 [Gallus gallus]	228.76	13	32	109	1	1	1.011	1.008	0.978	1.052	0.955	0.962	-0.0558912	0.165401
396212	NP_990606.1	metallothionein [Gallus gallus]	6.4616	23.8	1	1	1	0.636	1.323	0.713	1.351	0.734	1.232	1.875	0.906891	0.00026215
396219	NP_990613.1	lipoprotein lipase precursor [Gallus gallus]	55.132	3.5	1	1	1
396220	NP_990614.2	lysosome-associated membrane glycoprotein 1 precursor [Gallus gallus]	44.619	6.5	3	6	3	0.986	0.96	1.038	0.969	1.032	1.018	0.964	-0.0528949	0.21012
396222	NP_990616.1	lamin-B2 [Gallus gallus]	67.94	56.8	38	78	35	0.994	1.067	0.993	1.012	0.966	0.988	1.039	0.0551957	0.20224
396223	NP_990617.1	lamin-B1 [Gallus gallus]	66.529	34.6	21	29	18	1.024	0.987	1.072	0.966	1.014	0.948	0.933	-0.100051	0.028585
396224	NP_990618.1	lamin-A [Gallus gallus]	73.164	56.8	43	162	41	1.083	0.956	1.094	0.919	1.051	0.912	0.863	-0.212568	0.00148091
396226	NP_990620.1	integrin alpha-6 precursor [Gallus gallus]	119.2	12.8	11	12	11	1.165	0.832	1.222	0.741	1.237	0.788	0.651	-0.619271	0.00035741
396227	NP_990621.1	heat shock protein beta-1 [Gallus gallus]	21.671	67.4	12	25	12	1.033	1.015	0.983	0.939	1.056	0.965	0.95	-0.0740006	0.17552
396229	NP_990623.1	GTPase HRas precursor [Gallus gallus]	21.365	34.4	5	11	1
396232	NP_990626.2	high mobility group protein B3 [Gallus gallus]	24.952	25.8	7	15	7	1.091	1.044	1.029	0.946	1.005	0.957	0.943	-0.0846703	0.20978
396234	NP_990628.1	signal peptidase complex subunit 3 [Gallus gallus]	20.23	27.2	5	15	5	0.941	1.064	0.981	1.034	0.99	1.001	1.064	0.0894982	0.057623
396236	NP_990630.2	dystrophin [Gallus gallus]	422.92	1.7	4	4	4	0.964	1.04	1.02	1.023	1.059	0.914	0.978	-0.0320936	0.66528
396237	NP_990631.1	unconventional myosin-Va [Gallus gallus]	212.38	21.5	38	43	34	0.988	0.998	0.987	1.008	1.01	0.983	1.001	0.00144197	0.90424
396238	NP_990632.1	tyrosine-protein kinase Yes [Gallus gallus]	60.792	16.1	8	10	3
396241	NP_990635.1	ovotransferrin precursor [Gallus gallus]	77.893	16	10	11	10	1.002	1.142	0.945	0.938	0.961	1.006	1.061	0.0854247	0.40184
396246	NP_990639.1	fatty acid-binding protein, brain [Gallus gallus]	14.927	25.8	4	15	4	1.076	0.721	1.098	0.791	1.398	0.939	0.686	-0.54372	0.030357
396248	NP_990641.1	creatine kinase B-type [Gallus gallus]	42.87	59.6	18	48	18	0.638	1.216	0.629	1.428	0.631	1.352	2.105	1.07382	0.0040439
396254	NP_990646.1	tubulin beta-7 chain [Gallus gallus]	49.67	57.4	19	141	3	0.981	0.943	0.946	1.06	0.984	1.015	1.037	0.0524159	0.38958
396260	NP_990651.1	avidin precursor [Gallus gallus]	16.768	7.2	1	1	1
396261	NP_990652.1	aspartate aminotransferase, cytoplasmic [Gallus gallus]	45.935	22.6	8	13	8	1.013	1.001	1.044	1.004	1.04	0.974	0.962	-0.0558912	0.045344
396262	NP_990653.1	60S acidic ribosomal protein P1 [Gallus gallus]	11.477	51.8	2	15	2	0.95	1.166	0.976	1	1.039	0.998	1.067	0.0935602	0.33834
396265	NP_990656.1	ADP-ribosylation factor 5 [Gallus gallus]	20.479	50.6	8	19	1
396277	NP_990666.1	transthyretin isoform 1 precursor [Gallus gallus]	16.309	36.7	4	6	4	1.045	0.797	1.474	0.684	1.16	0.853	0.634	-0.657445	0.02066
396280	NP_990668.1	60S ribosomal protein L27 [Gallus gallus]	15.798	45.6	8	26	8	0.97	0.979	0.969	1.03	1.013	1.064	1.041	0.0579701	0.23238
396287	NP_990675.1	heme oxygenase 1 [Gallus gallus]	33.509	52.7	15	27	15	0.978	1.005	0.956	1.039	0.944	1.02	1.065	0.0908534	0.0114038
396292	NP_990679.1	collagen alpha-2(VI) chain precursor [Gallus gallus]	109.18	37.7	37	94	37	1.125	0.912	1.08	0.937	1.022	0.933	0.862	-0.21424	0.0070759
396303	NP_990686.1	E3 ubiquitin-protein ligase RNF13 precursor [Gallus gallus]	42.819	12.1	2	3	2	1.028	0.934	1.086	1.038	0.983	0.944	0.942	-0.086201	0.243
396312	NP_990689.2	LIM/homeobox protein LMX-1.2 [Gallus gallus]	45.027	2.2	1	1	1	1.062	0.883	1.062	0.89	1.197	0.928	0.813	-0.298673	0.0086444
396322	NP_990696.1	glutathione S-transferase theta-1 [Gallus gallus]	29.822	8.8	3	4	1
396325	NP_990699.1	elongation factor 2 [Gallus gallus]	95.377	51.3	46	146	45	0.971	0.971	0.949	1.01	1.036	1.069	1.032	0.045443	0.46102
396326	NP_990700.1	RNA transcription, translation and transport factor protein [Gallus gallus]	27.389	54	14	22	14	0.979	1.07	0.972	1.005	0.941	1.056	1.083	0.115033	0.024921
396329	NP_990702.2	cathepsin B precursor [Gallus gallus]	37.652	38.8	12	37	12	1.101	0.945	1.047	0.955	1.034	0.932	0.89	-0.168123	0.0047351
396330	NP_990703.1	interferon regulatory factor 3 [Gallus gallus]	54.441	8.4	3	3	3
396341	NP_990712.1	G1/S-specific cyclin-D1 [Gallus gallus]	33.263	5.1	1	1	1
396349	NP_990719.1	dual specificity mitogen-activated protein kinase kinase 2 [Gallus gallus]	44.077	15.1	5	5	1
396356	NP_990723.1	myosin light chain kinase 2, skeletal/cardiac muscle [Gallus gallus]	87.213	0.8	1	1	1
396363	NP_990729.1	translationally-controlled tumor protein homolog [Gallus gallus]	19.53	43.6	8	23	8	0.98	0.928	0.938	1.016	1.047	1.098	1.026	0.0370307	0.6975
396367	NP_990733.1	guanine nucleotide-binding protein G(i) subunit alpha-2 [Gallus gallus]	40.577	32.7	10	22	7	0.975	1.022	1.02	0.984	1.015	1.005	1	0	0.9827
396371	NP_990737.2	Y-box-binding protein 3 [Gallus gallus]	30.843	38.8	10	18	8	1.047	0.989	0.997	0.98	0.978	0.927	0.958	-0.0619024	0.21146
396393	NP_990753.1	extracellular fatty acid-binding protein precursor [Gallus gallus]	20.127	41.6	6	15	6	0.512	1.369	0.494	1.423	0.31	1.394	3.181	1.66948	0.0182815
396399	NP_990759.1	TGF-beta receptor type-2 precursor [Gallus gallus]	63.308	17.2	8	9	8	0.885	1.11	0.907	1.149	0.848	1.08	1.265	0.339137	0.00090295
396413	NP_990764.1	fibroblast growth factor 2 precursor [Gallus gallus]	17.374	30.4	6	9	6	1.019	1.042	1.038	0.956	1.023	0.951	0.957	-0.0634092	0.21558
396416	NP_990766.1	focal adhesion kinase 1 [Gallus gallus]	119.21	14.1	13	15	13	1.037	0.97	0.982	0.971	1.084	1.016	0.953	-0.0694519	0.21566
396420	NP_990770.1	integrin alpha-V precursor [Gallus gallus]	114.39	33.1	29	54	29	0.924	1.06	0.952	1.093	0.92	1.036	1.141	0.190299	0.0022389
396422	NP_990772.1	vinculin [Gallus gallus]	117	65.2	71	170	71	1.055	0.91	1.054	0.917	1.138	0.966	0.86	-0.217591	0.0089027
396426	NP_990775.1	tubulin alpha-2 chain [Gallus gallus]	49.798	16.4	8	59	1	0.991	1.074	0.939	0.948	1.101	1.009	1	0	0.98852
396435	NP_990782.1	triosephosphate isomerase [Gallus gallus]	26.62	75.4	16	56	16	1.038	0.905	0.987	0.963	1.067	1.024	0.935	-0.0969617	0.185456
396437	NP_990784.1	thioredoxin [Gallus gallus]	11.7	49.5	7	33	7	1.06	0.811	1.061	0.842	1.309	0.951	0.759	-0.397828	0.032665
396439	NP_990786.1	tensin [Gallus gallus]	186.12	20.1	27	37	25	1.054	0.936	1.03	0.994	0.995	0.939	0.932	-0.101598	0.051356
396440	NP_990787.2	tenascin precursor [Gallus gallus]	198.92	40.2	54	121	54	0.938	1.132	0.914	1.11	0.857	1.054	1.217	0.283329	0.0045848
396447	NP_990792.1	peptidyl-prolyl cis-trans isomerase B precursor [Gallus gallus]	22.413	46.9	10	61	9	1.024	1.033	0.991	1.021	0.95	0.994	1.028	0.0398403	0.31794
396448	NP_990793.1	40S ribosomal protein S15 [Gallus gallus]	17.04	26.2	3	22	3	0.998	1.036	0.969	1.005	1.012	1.031	1.031	0.0440443	0.124558
396457	NP_990801.1	phosphoenolpyruvate carboxykinase [GTP], mitochondrial precursor [Gallus gallus]	70.969	13.1	6	6	6	0.951	1.077	0.967	1.11	0.916	1.01	1.128	0.173767	0.020182
396471	NP_990809.2	myeloid protein 1 precursor [Gallus gallus]	35.216	7.8	1	1	1	0.937	0.897	0.995	1.051	1.015	1.109	1.037	0.0524159	0.65094
396474	NP_990812.2	protein-lysine 6-oxidase precursor [Gallus gallus]	47.989	10.3	2	2	2	0.987	0.963	0.995	1.047	0.985	1.031	1.025	0.0356239	0.45184
396483	NP_990818.1	metalloproteinase inhibitor 3 precursor [Gallus gallus]	24.504	19.8	5	6	5	1.29	0.701	1.314	0.611	1.451	0.678	0.491	-1.02621	0.00020402
396484	NP_990819.1	homeobox protein MSX-1 [Gallus gallus]	30.517	2.8	1	1	1
396485	NP_990820.1	hemoglobin subunit beta [Gallus gallus]	16.466	44.2	6	8	5	0.912	0.965	1.174	1.174	0.902	0.95	1.034	0.0482362	0.75866
396487	NP_990822.1	endoplasmic reticulum chaperone BiP precursor [Gallus gallus]	72.018	62.7	44	197	41	1.001	1.03	0.992	1.022	0.978	0.994	1.025	0.0356239	0.122798
396489	NP_990824.1	glutamine synthetase [Gallus gallus]	42.146	24.9	10	15	10	0.382	1.427	0.374	1.768	0.358	1.644	4.344	2.11902	2.2002e-05
396491	NP_990826.1	beta-galactoside-binding lectin [Gallus gallus]	15.063	71.1	9	63	9	1.109	0.883	1.007	0.845	1.179	0.962	0.816	-0.293359	0.027501
396492	NP_990827.1	Golgi apparatus protein 1 precursor [Gallus gallus]	129.71	45	50	100	50	1.008	1.006	1.036	1.001	0.99	0.983	0.985	-0.0218044	0.38774
396495	NP_990829.1	interleukin-8 precursor [Gallus gallus]	11.056	33	3	3	3	0.273	1.362	0.272	1.522	0.344	1.457	4.883	2.28777	4.3026e-05
396496	NP_990830.1	drebrin [Gallus gallus]	66.685	24.5	13	16	13	1.042	1.005	0.995	0.989	0.991	0.95	0.972	-0.0409718	0.29214
396497	NP_990831.2	cystatin precursor [Gallus gallus]	16.294	35.1	4	8	4	1.242	0.775	1.281	0.726	1.215	0.764	0.606	-0.72261	3.8471e-05
396517	NP_990842.1	solute carrier family 2, facilitated glucose transporter member 3 [Gallus gallus]	54.174	10.3	4	4	4	0.97	0.968	1.034	1.083	0.976	1.031	1.034	0.0482362	0.43762
396521	NP_990846.1	F-actin-capping protein subunit alpha-1 [Gallus gallus]	32.959	69.2	12	24	10	0.988	0.999	0.995	0.97	1.068	0.979	0.966	-0.0499049	0.26874
396526	NP_990849.1	actin, cytoplasmic 1 [Gallus gallus]	41.736	74.9	23	526	1
396530	NP_990852.1	sodium/potassium-transporting ATPase subunit alpha-1 precursor [Gallus gallus]	112.23	33.2	29	39	29	1.008	0.975	1.009	1.006	1.025	0.97	0.97	-0.0439433	0.073042
396533	NP_990854.1	aspartate aminotransferase, mitochondrial precursor [Gallus gallus]	47.241	43.7	21	42	3	0.964	0.991	0.987	0.994	1.024	1.077	1.029	0.041243	0.43076
396536	NP_990856.1	apolipoprotein A-I preproprotein [Gallus gallus]	30.68	49.6	15	21	15	0.778	1.178	0.813	1.277	0.805	1.069	1.471	0.556797	0.001956
396539	NP_990859.1	destrin [Gallus gallus]	18.532	75.2	14	36	13	1.012	0.901	1.027	0.942	1.127	0.988	0.894	-0.161653	0.060398
396540	NP_990860.1	adenylosuccinate lyase [Gallus gallus]	51.786	17.9	7	10	7	0.992	0.963	1.034	0.995	1.041	0.997	0.963	-0.0543923	0.119782
396549	NP_990866.1	sodium/potassium-transporting ATPase subunit beta-3 [Gallus gallus]	31.858	32.1	10	16	10	0.943	0.99	0.978	1.02	1.013	1.052	1.044	0.0621217	0.189336
395414	NP_996761.1	T-complex protein 1 subunit delta [Gallus gallus]	57.736	48.1	22	52	22	0.968	1.009	0.964	1.026	0.977	1.054	1.062	0.0867838	0.0108361
404271	NP_996789.1	annexin A1 [Gallus gallus]	38.5	62.9	25	65	25	1.017	0.882	0.984	1.005	1.112	1.02	0.934	-0.0985055	0.30498
396011	NP_996835.1	DNA (cytosine-5)-methyltransferase 1 [Gallus gallus]	172.91	7.6	9	9	9	1.034	0.99	1.025	0.984	0.911	1.009	1.004	0.00575927	0.89292
404304	NP_996866.1	secretory phospholipase A2 receptor precursor [Gallus gallus]	168.56	0.8	1	1	1	0.766	1.176	0.866	1.227	0.726	1.223	1.538	0.621056	0.00130414
404531	NP_996869.2	RNA-binding protein 12 [Gallus gallus]	93.043	13.6	13	16	13	0.974	1.018	0.993	1.005	0.965	0.982	1.025	0.0356239	0.142835
395695	NP_997062.2	A-kinase anchor protein 9 [Gallus gallus]	455.44	8.4	27	29	27	0.986	0.994	0.99	1.053	0.994	0.999	1.026	0.0370307	0.31186
404750	NP_998738.1	cysteine protease ATG4B [Gallus gallus]	44.53	12.5	5	7	5	1.066	0.891	1.1	0.913	1.16	0.919	0.819	-0.288065	0.00164116
404751	NP_998739.1	NADH dehydrogenase [ubiquinone] 1 subunit C2 [Gallus gallus]	11.029	40.6	5	6	5
404771	NP_998744.1	GTP-binding protein GEM [Gallus gallus]	34.237	11.8	3	5	3	1.224	0.777	1.201	0.763	1.22	0.858	0.658	-0.603841	0.00034043
404775	NP_998746.1	nuclear ubiquitous casein and cyclin-dependent kinase substrate 1 [Gallus gallus]	32.595	22.6	5	5	5	1.039	0.909	1.039	0.998	1.004	1.067	0.965	-0.0513992	0.475
408051	NP_999839.1	protocadherin gamma-C3 precursor [Gallus gallus]	100.35	4.8	4	4	4	0.943	0.973	1.033	1.022	0.977	1.056	1.033	0.0468403	0.40956
768337	XP_001231210.4	tubulin beta-1 chain-like [Gallus gallus]	49.923	57.3	19	131	1	1.104	0.992	1.007	0.906	1.041	0.964	0.908	-0.139236	0.063723
420317	XP_001231272.1	KH domain-containing, RNA-binding, signal transduction-associated protein 3 isoform X3 [Gallus gallus]	38.714	5.5	2	3	2	1.182	0.868	1.217	0.78	1.165	0.815	0.691	-0.533242	0.00038211
422174	XP_001231274.3	ribosomal biogenesis protein LAS1L [Gallus gallus]	72.498	4.2	3	3	3	0.956	0.97	1.046	1.021	1.013	1.005	0.994	-0.00868224	0.85642
768427	XP_001231333.3	peptidyl-prolyl cis-trans isomerase C [Gallus gallus]	38.074	16.4	6	14	5	1.045	0.939	1.086	0.924	1.055	0.979	0.892	-0.164884	0.005281
768660	XP_001231375.1	ATP synthase subunit epsilon, mitochondrial [Gallus gallus]	5.7928	51	3	6	3	0.984	1.008	1.046	1.044	0.933	0.993	1.028	0.0398403	0.48004
420374	XP_001231410.2	E3 ubiquitin-protein ligase TRIM7 [Gallus gallus]	52.977	10.8	4	4	4	0.978	1.012	0.992	0.972	1.05	1.007	0.99	-0.0144996	0.72924
420869	XP_001231411.2	desmoplakin isoform X4 [Gallus gallus]	259.56	1.4	3	3	3	1.238	0.867	0.986	1.02	0.912	0.986	0.916	-0.12658	0.47812
427457	XP_001231514.2	queuosine salvage protein [Gallus gallus]	39.061	35.8	10	12	10	1.01	1.012	1.027	0.91	1.145	1.018	0.924	-0.114035	0.21536
768530	XP_001231519.1	group XV phospholipase A2 [Gallus gallus]	47.509	10.6	3	3	3	0.926	0.952	1.063	0.947	1.047	1.068	0.977	-0.0335695	0.71912
421936	XP_001231545.2	ribonucleoside-diphosphate reductase subunit M2 [Gallus gallus]	44.439	4.7	1	1	1
771123	XP_001231625.2	protein kish-B [Gallus gallus]	8.226	20.3	2	2	2	0.959	0.967	0.952	1.027	1.012	1.087	1.054	0.0758749	0.25304
768611	XP_001231650.1	pre-mRNA-splicing factor 38B [Gallus gallus]	64.892	8.9	5	6	5	1.024	0.916	1.014	0.967	1.032	1.042	0.953	-0.0694519	0.31778
427375	XP_001231708.2	elongator complex protein 1 [Gallus gallus]	150.4	6.3	7	8	7	0.951	0.941	0.976	1.005	1.022	0.999	0.999	-0.00144342	0.96594
769006	XP_001231776.1	COMM domain-containing protein 1 isoform X1 [Gallus gallus]	21.434	24.2	4	5	4	1.027	0.977	0.99	1.094	0.924	0.998	1.044	0.0621217	0.41424
422805	XP_001231777.2	anaphase-promoting complex subunit 4 isoform X1 [Gallus gallus]	94.593	1	1	1	1
768706	XP_001231794.2	propionyl-CoA carboxylase beta chain, mitochondrial isoform X2 [Gallus gallus]	57.502	19.1	9	11	9	1.061	1.066	0.996	0.982	0.939	0.966	1.006	0.00863031	0.89904
769097	XP_001231914.2	N-acetylserotonin O-methyltransferase-like protein isoform X2 [Gallus gallus]	69.496	13.9	6	6	6	0.768	1.335	0.674	1.223	0.526	1.435	2.029	1.02077	0.0039609
423263	XP_001231965.2	polypeptide N-acetylgalactosaminyltransferase 16 isoform X1 [Gallus gallus]	63.881	19.5	7	7	7	1.037	1.054	1.036	0.969	1.063	1.006	0.966	-0.0499049	0.2428
769847	XP_001231971.4	glutathione S-transferase theta-1 [Gallus gallus]	28.976	24.4	6	9	4	1.075	0.888	0.97	0.897	1.139	1.043	0.888	-0.171368	0.16442
428749	XP_001231979.2	RWD domain-containing protein 4 isoform X2 [Gallus gallus]	20.082	15.7	3	3	3	0.991	1.029	0.917	1.104	0.948	1.021	1.104	0.14274	0.041636
769300	XP_001232002.1	syntaxin-12 isoform X2 [Gallus gallus]	30.797	37.9	8	22	8	1.122	1.001	1.063	0.937	1.03	0.96	0.901	-0.150401	0.030481
768898	XP_001232052.1	nucleolar RNA helicase 2 [Gallus gallus]	79.184	25.7	15	24	15	0.975	1.092	0.953	1.019	0.929	1.042	1.104	0.14274	0.016385
768942	XP_001232112.3	lon protease homolog, mitochondrial [Gallus gallus]	103.65	27.6	24	36	24	0.93	1.069	0.951	1.105	0.92	1.046	1.15	0.201634	0.00173881
422747	XP_001232120.1	exocyst complex component 1 isoform X7 [Gallus gallus]	100.53	10	9	10	9	0.988	1.028	1.02	0.965	0.968	1.035	1.017	0.0243197	0.56178
769700	XP_001232123.1	39S ribosomal protein L17, mitochondrial isoform X1 [Gallus gallus]	18.977	14.7	3	3	3	1.044	0.849	1.025	1.04	0.97	1.075	0.975	-0.0365259	0.71836
422105	XP_001232140.1	39S ribosomal protein L27, mitochondrial [Gallus gallus]	15.048	24.5	3	4	3	0.989	1.117	1.117	0.969	0.848	0.963	1.032	0.045443	0.72228
417925	XP_001232183.1	inhibitor of nuclear factor kappa-B kinase-interacting protein isoform X2 [Gallus gallus]	39.595	9.4	4	4	3
416942	XP_001232199.2	sphingomyelin phosphodiesterase 4 isoform X2 [Gallus gallus]	93.68	8.7	6	8	6	0.985	0.977	0.989	1.038	1	1.022	1.021	0.0299829	0.33168
769031	XP_001232214.2	39S ribosomal protein L12, mitochondrial [Gallus gallus]	20.912	34	6	6	6	1.01	0.994	1.052	1.073	0.965	0.971	1.004	0.00575927	0.93624
427122	XP_001232418.2	endoplasmic reticulum aminopeptidase 1 [Gallus gallus]	106.56	12.4	11	12	11	0.896	1.057	0.927	1.036	0.991	1.059	1.12	0.163499	0.0198416
415987	XP_001232444.1	caspase recruitment domain-containing protein 19 isoform X6 [Gallus gallus]	18.983	9.9	1	1	1
426664	XP_001232507.2	microspherule protein 1 [Gallus gallus]	56.747	3.5	1	1	1
769868	XP_001232518.1	zinc finger protein 512 isoform X2 [Gallus gallus]	64.678	12.1	6	7	6	0.882	1.156	1.106	1.175	0.99	0.727	1.027	0.0384362	0.96734
422203	XP_001232519.1	UDP-N-acetylglucosamine--peptide N-acetylglucosaminyltransferase 110 kDa subunit isoform X2 [Gallus gallus]	115.51	16.6	13	14	13	0.992	1.098	0.991	1.012	0.949	0.977	1.053	0.0745054	0.24956
422115	XP_001232614.1	ATP synthase subunit d, mitochondrial [Gallus gallus]	18.343	76.4	12	17	12	0.964	0.972	1.024	1.056	0.969	1.003	1.025	0.0356239	0.4726
421183	XP_001232616.1	mitogen-activated protein kinase 14 isoform X1 [Gallus gallus]	41.458	34.7	9	11	9	0.923	0.97	0.879	1.095	1.011	1.108	1.128	0.173767	0.111242
769390	XP_001232656.1	adenylyltransferase and sulfurtransferase MOCS3 [Gallus gallus]	50.819	11.3	3	3	3	0.989	0.86	0.871	1.117	1.073	1.1	1.049	0.0690147	0.6906
428329	XP_001232670.1	UBX domain-containing protein 6 isoform X2 [Gallus gallus]	49.782	20.5	6	7	6	1.069	1.008	1.031	0.947	1.013	0.946	0.932	-0.101598	0.054663
769424	XP_001232700.1	inorganic pyrophosphatase [Gallus gallus]	32.637	60.3	14	21	13	1.018	0.896	0.985	0.96	1.102	1.067	0.941	-0.0877334	0.36592
769464	XP_001232744.3	F-BAR domain only protein 2 isoform X7 [Gallus gallus]	94.84	3.3	3	3	3	0.999	0.997	1.074	0.948	1.017	0.975	0.945	-0.0816138	0.098042
424108	XP_001232772.4	abl interactor 2 isoform X11 [Gallus gallus]	49.376	12.8	6	6	3	0.978	0.946	1.041	0.977	1.058	1.011	0.954	-0.0679388	0.197604
769492	XP_001232780.2	NADH dehydrogenase [ubiquinone] iron-sulfur protein 8, mitochondrial [Gallus gallus]	35.36	21.8	6	12	6	0.913	1.025	0.987	1.034	0.997	1.033	1.067	0.0935602	0.142417
417381	XP_001232803.2	tRNA-dihydrouridine(16/17) synthase [NAD(P)(+)]-like isoform X2 [Gallus gallus]	55.364	1.9	1	1	1	1.044	1.002	1.011	0.959	0.986	1.006	0.976	-0.0350469	0.33676
416770	XP_001232858.1	stromal cell-derived factor 2-like protein 1 [Gallus gallus]	23.143	25.6	4	6	4	1.047	1.077	1.034	1.028	0.844	0.975	1.053	0.0745054	0.50272
769579	XP_001232866.1	histidine triad nucleotide-binding protein 3 [Gallus gallus]	18.599	12	1	1	1	1.059	0.972	0.84	0.94	1.074	1.12	1.02	0.0285692	0.82334
770496	XP_001232874.2	C-Myc-binding protein [Gallus gallus]	11.89	18.4	2	2	2
423764	XP_001232876.1	protein transport protein Sec31B isoform X2 [Gallus gallus]	130.97	6	6	6	6	0.948	1.054	0.912	1.037	0.983	1.031	1.098	0.134878	0.014199
769612	XP_001232900.3	neutral amino acid transporter A [Gallus gallus]	55.685	12.8	7	8	7	1.061	1.022	0.995	0.964	1.004	0.952	0.96	-0.0588937	0.24164
769632	XP_001232920.2	U3 small nucleolar RNA-associated protein 4 homolog isoform X2 [Gallus gallus]	76.448	17.3	10	13	10	1.019	1.023	1.012	0.982	0.939	0.985	1.007	0.0100637	0.81756
419608	XP_001232935.1	splicing factor 3A subunit 3 [Gallus gallus]	58.888	26.7	14	22	14	0.995	1.087	0.975	0.983	0.934	1.018	1.063	0.0881416	0.155702
769654	XP_001232942.3	beta-2-syntrophin [Gallus gallus]	57.396	16.6	8	12	8	0.985	1.012	1.001	1.03	1.012	0.984	1.009	0.0129262	0.5843
420434	XP_001232988.3	GTP-binding protein Rheb isoform X1 [Gallus gallus]	29.28	14.4	4	5	4	1.072	0.958	0.968	1.012	1.012	0.966	0.962	-0.0558912	0.32586
769715	XP_001233004.3	X-ray radiation resistance-associated protein 1 [Gallus gallus]	86.465	1.7	1	1	1	0.55	1.001	0.925	1.479	1.214	0.872	1.247	0.318461	0.43122
422245	XP_001233032.1	HIV Tat-specific factor 1 [Gallus gallus]	51.078	24.2	10	10	10	1.004	1.077	0.984	0.987	0.917	0.983	1.049	0.0690147	0.30554
769797	XP_001233104.2	ras-related protein Rap-2a [Gallus gallus]	20.654	20.8	3	4	1	0.977	0.892	1.123	0.956	1.153	0.92	0.851	-0.232769	0.044679
770634	XP_001233122.1	fibrinogen silencer-binding protein [Gallus gallus]	34.41	2.3	1	2	1	0.933	0.928	0.979	1.003	1.055	1.107	1.024	0.0342157	0.7383
769924	XP_001233237.2	guanine nucleotide-binding protein subunit alpha-12 [Gallus gallus]	44.887	20.9	7	8	6	1.059	0.994	0.969	1.092	1.01	1.024	1.024	0.0342157	0.57078
770004	XP_001233320.2	carbonic anhydrase 9 isoform X2 [Gallus gallus]	43.752	20.2	6	7	6	0.892	1.083	0.948	1.126	0.971	0.986	1.137	0.185232	0.053181
770011	XP_001233329.2	myosin regulatory light chain 2, smooth muscle minor isoform [Gallus gallus]	19.883	59.9	10	52	5	0.969	0.959	1.006	0.963	1.048	1.017	0.972	-0.0409718	0.39582
771142	XP_001233341.3	phosphatidylinositol 3-kinase regulatory subunit beta [Gallus gallus]	83.493	13.1	8	8	7	0.916	1.064	1.077	1.007	1.002	0.965	1.014	0.0200577	0.79774
770061	XP_001233375.2	signal recognition particle 19 kDa protein [Gallus gallus]	16.099	37.5	5	9	5	0.961	0.871	1.022	1.101	1.018	1.036	1.002	0.00288251	0.97826
770087	XP_001233405.2	translation machinery-associated protein 16 [Gallus gallus]	22.285	6.3	1	1	1
423985	XP_001233408.2	WD repeat-containing protein 75 [Gallus gallus]	93.623	13.3	10	12	10	0.982	0.974	1.033	0.987	0.979	1.033	1	0	0.99958
771771	XP_001233464.1	TBC1 domain family member 13 [Gallus gallus]	46.484	8.8	3	3	3	0.836	0.969	1.077	1.013	1.021	1.086	1.046	0.0648829	0.58802
771510	XP_001233575.1	NADH dehydrogenase [ubiquinone] iron-sulfur protein 5 [Gallus gallus]	12.651	57.5	5	6	5	0.98	0.944	1.004	1.105	0.904	0.958	1.041	0.0579701	0.5491
770261	XP_001233592.2	28S ribosomal protein S15, mitochondrial [Gallus gallus]	27.932	7.4	2	2	2	0.959	1.065	0.973	1.075	0.981	0.962	1.065	0.0908534	0.163537
425018	XP_001233639.1	elongation factor G, mitochondrial [Gallus gallus]	82.407	21.8	15	17	15	0.984	0.958	0.943	1.036	1.016	1.016	1.023	0.0328061	0.52124
771383	XP_001233648.1	ras-related protein Rab-21 [Gallus gallus]	24.11	29.5	6	11	6	0.968	0.92	0.987	1.004	0.933	0.991	1.009	0.0129262	0.7949
770755	XP_001233649.1	essential MCU regulator, mitochondrial [Gallus gallus]	9.8322	22.3	1	1	1	1.098	0.599	1.189	0.53	1.244	1.32	0.694	-0.526992	0.25776
427819	XP_001233717.4	tyrosine-protein kinase BAZ1B isoform X1 [Gallus gallus]	171.28	3.4	4	4	4	1.037	0.92	1.002	1.071	0.978	1.023	0.999	-0.00144342	0.95776
770439	XP_001233774.4	NCK-interacting protein with SH3 domain isoform X1 [Gallus gallus]	84.043	7.1	4	5	4	0.963	0.957	1.187	0.946	0.976	0.977	0.921	-0.118727	0.3744
770448	XP_001233783.1	desumoylating isopeptidase 1 [Gallus gallus]	18.725	9.5	1	1	1	1.023	1.083	0.988	0.939	0.92	1.048	1.047	0.0662614	0.4414
770472	XP_001233807.2	28S ribosomal protein S12, mitochondrial [Gallus gallus]	23.134	15.3	2	2	2	1.091	0.872	1.257	1.064	0.826	0.896	0.892	-0.164884	0.4969
771652	XP_001233932.2	cytochrome c oxidase assembly factor 6 homolog [Gallus gallus]	14.5	20.9	2	2	2	0.997	1.001	1.044	1.053	0.935	0.979	1.019	0.0271541	0.6393
770613	XP_001233951.2	RAB6-interacting golgin isoform X2 [Gallus gallus]	42.011	5.4	2	2	2	0.844	1.087	0.963	1.067	0.968	1.074	1.163	0.217851	0.077098
770621	XP_001233960.1	protein FAM91A1 [Gallus gallus]	94.425	13.4	10	13	10	1.012	1.063	0.972	1.015	0.931	0.993	1.054	0.0758749	0.170605
770653	XP_001233991.2	uncharacterized protein LOC770653 [Gallus gallus]	34.888	17.3	5	7	5	0.971	0.975	0.975	0.913	1.115	1.047	0.959	-0.0603973	0.52862
770708	XP_001234038.2	methyltransferase-like protein 27 [Gallus gallus]	25.765	5.5	1	1	1
770722	XP_001234052.1	40S ribosomal protein S25 [Gallus gallus]	13.712	35.2	6	20	6	0.988	1.064	0.934	1.039	0.946	1.007	1.084	0.116365	0.025442
419299	XP_001234108.1	beta-catenin-like protein 1 isoform X1 [Gallus gallus]	65.153	15.3	9	10	8	1.001	1.058	1.032	0.979	0.945	0.964	1.008	0.0114956	0.85526
772251	XP_001234221.1	cytochrome c oxidase assembly factor 3 homolog, mitochondrial [Gallus gallus]	11.791	24	3	3	3	0.957	0.989	0.966	1.091	0.978	1.028	1.071	0.0989585	0.080137
770911	XP_001234226.3	diacylglycerol kinase epsilon [Gallus gallus]	64.158	2.3	1	1	1
771180	XP_001234476.2	tripartite motif-containing protein 35 isoform X2 [Gallus gallus]	59.521	4	1	1	1
771269	XP_001234561.1	protein-cysteine N-palmitoyltransferase HHAT [Gallus gallus]	58.902	2.6	1	1	1
771273	XP_001234565.2	28S ribosomal protein S36, mitochondrial [Gallus gallus]	11.645	29.9	4	6	4	1.031	1.024	1.02	0.998	0.913	1.018	1.026	0.0370307	0.53666
771294	XP_001234587.2	cyclin-dependent kinase 7 [Gallus gallus]	38.631	13.7	4	5	4	1.032	0.988	0.944	1.04	0.997	1.01	1.022	0.0313952	0.50124
417604	XP_001234671.1	ER membrane protein complex subunit 6 [Gallus gallus]	12.056	20	2	3	2	1.009	1.022	1.022	1.004	0.958	0.994	1.01	0.0143553	0.64474
426536	XP_001234689.4	2-iminobutanoate/2-iminopropanoate deaminase [Gallus gallus]	14.821	43.2	5	5	5	0.985	0.917	1.029	0.978	1.165	0.967	0.9	-0.152003	0.129716
771421	XP_001234697.3	peroxisomal membrane protein PEX14 [Gallus gallus]	41.646	13	4	5	4	0.964	1.112	0.981	1.021	0.951	0.983	1.076	0.105678	0.127838
771550	XP_001234814.4	ephrin type-A receptor 2 [Gallus gallus]	107.28	16.5	13	18	12	0.885	1.111	0.863	1.138	0.858	1.133	1.298	0.37629	2.3444e-05
421403	XP_001234903.3	leucine-rich PPR motif-containing protein, mitochondrial [Gallus gallus]	155.63	43.5	58	88	58	0.965	1.009	1.012	1.043	0.973	1.004	1.036	0.051024	0.13502
771782	XP_001235016.2	ras-related protein Rab-7b [Gallus gallus]	23.441	41.5	9	12	9	0.967	1.057	0.986	1.032	0.977	0.987	1.05	0.0703893	0.081618
428891	XP_001235085.4	serine/threonine-protein kinase Nek9 isoform X1 [Gallus gallus]	106.44	5.2	4	4	4	0.985	0.965	0.975	1.04	1.077	0.975	0.981	-0.027675	0.66278
428449	XP_001235241.1	phosphoinositide 3-kinase regulatory subunit 4 isoform X2 [Gallus gallus]	153.5	3.5	5	5	5	0.977	1.05	0.987	0.951	0.979	1.058	1.039	0.0551957	0.39042
772054	XP_001235249.1	SRA stem-loop-interacting RNA-binding protein, mitochondrial [Gallus gallus]	12.336	44.2	4	6	4	0.985	1.082	1.016	0.984	0.982	0.95	1.011	0.015783	0.82368
418139	XP_001235265.2	DENN domain-containing protein 5B isoform X5 [Gallus gallus]	144.19	1.7	2	2	1
772090	XP_001235278.1	probable ATP-dependent RNA helicase DHX40 [Gallus gallus]	82.922	1.8	1	1	1
772226	XP_001235393.2	coiled-coil and C2 domain-containing protein 1B [Gallus gallus]	97.792	9.5	7	8	7	0.974	1.015	1.066	0.992	0.995	0.933	0.969	-0.0454314	0.44088
772302	XP_001235458.2	hepatoma-derived growth factor-related protein 2 isoform X2 [Gallus gallus]	71.927	12.2	7	8	6	0.889	1.09	1.015	1.099	0.677	1.208	1.316	0.396159	0.080763
775978	XP_001235553.2	TM2 domain-containing protein 1 [Gallus gallus]	22.035	8	1	1	1	1.114	0.998	0.988	0.931	1.082	0.908	0.891	-0.166503	0.066483
776127	XP_001235680.4	adenylosuccinate synthetase isozyme 1 [Gallus gallus]	50.097	40.8	15	23	14	1.079	0.836	1.097	0.866	1.164	0.933	0.789	-0.341903	0.003921
776223	XP_001235757.2	acid sphingomyelinase-like phosphodiesterase 3a [Gallus gallus]	53.569	9.7	4	6	4	1.049	1.001	1.018	0.988	1.003	0.947	0.956	-0.0649175	0.103739
776936	XP_001236427.2	hepatoma-derived growth factor [Gallus gallus]	26.248	53	15	27	14	1.015	0.964	1.048	0.94	1.04	0.966	0.925	-0.112475	0.0039171
777320	XP_001236782.2	ubiquitin thioesterase OTUB1 [Gallus gallus]	31.176	44.1	12	25	12	0.941	0.961	1.009	1.009	1.062	1.018	0.992	-0.011588	0.86576
429671	XP_003640374.1	protein SCO2 homolog, mitochondrial [Gallus gallus]	28.135	10.8	2	2	2	0.959	0.931	1.085	0.99	1.047	0.999	0.945	-0.0816138	0.26082
425522	XP_003640379.2	calcium/calmodulin-dependent protein kinase type 1D [Gallus gallus]	43.695	9.2	3	3	2
427844	XP_003640388.4	leucine-rich repeat serine/threonine-protein kinase 2 isoform X1 [Gallus gallus]	285.24	3.2	7	7	7	1.104	1.143	0.912	0.948	1.083	0.839	0.945	-0.0816138	0.6062
417984	XP_003640423.1	coiled-coil domain-containing protein 134 isoform X5 [Gallus gallus]	26.549	27.9	6	6	6	0.878	0.959	1.032	1.064	0.994	1.076	1.067	0.0935602	0.3404
771207	XP_003640432.2	pyridoxal phosphate phosphatase [Gallus gallus]	31.928	8	2	2	2	0.973	0.94	0.88	1.096	1.027	1.093	1.086	0.119024	0.29206
418075	XP_003640457.1	DCC-interacting protein 13-beta [Gallus gallus]	73.774	54.4	28	44	27	1.13	0.885	1.128	0.876	1.114	0.911	0.792	-0.336428	4.4945e-05
770083	XP_003640487.1	adaptin ear-binding coat-associated protein 1 [Gallus gallus]	29.662	9.5	3	4	3	0.932	1.042	0.994	0.987	1.065	0.962	1	0	0.9846
427975	XP_003640527.1	nucleolar pre-ribosomal-associated protein 1 [Gallus gallus]	258.74	4	8	8	8	0.93	1.01	1.073	1.01	0.993	0.981	1.002	0.00288251	0.94206
771556	XP_003640553.2	trafficking protein particle complex subunit 10 [Gallus gallus]	143.46	4.7	4	5	4	0.89	1.048	1.058	1.017	0.961	1.031	1.064	0.0894982	0.2713
100857674	XP_003640560.1	uncharacterized protein CXorf21 homolog [Gallus gallus]	32.234	3.8	1	1	1
770637	XP_003640567.2	protein SON isoform X3 [Gallus gallus]	414.74	14.1	38	50	38	0.964	1.059	0.991	1	0.949	1.017	1.059	0.0827026	0.053663
100858560	XP_003640625.1	exosome complex component RRP43 [Gallus gallus]	29.831	21	5	6	5	0.99	1.016	1.036	0.956	0.984	0.994	0.985	-0.0218044	0.57296
428399	XP_003640692.1	guanylate kinase isoform X2 [Gallus gallus]	22.334	17.7	3	3	3	0.954	0.929	1.062	0.95	1.111	1.007	0.923	-0.115597	0.198624
428458	XP_003640771.3	upstream-binding protein 1 isoform X4 [Gallus gallus]	56.444	3.4	1	1	1	0.898	1.166	0.877	1.094	0.872	1.092	1.266	0.340277	0.00054116
420998	XP_003640838.2	alpha-1,3/1,6-mannosyltransferase ALG2 [Gallus gallus]	46.659	18	6	7	6	0.982	1.015	0.907	1.025	0.96	1.014	1.072	0.100305	0.099265
421048	XP_003640848.1	ras-related protein Rab-12 [Gallus gallus]	27.791	34	8	11	8	0.987	0.937	0.999	1.057	0.976	1.018	1.017	0.0243197	0.69028
428379	XP_003640897.4	nudC domain-containing protein 1 isoform X2 [Gallus gallus]	66.987	9	4	5	4	0.941	1.056	1.025	0.966	1.06	1.033	1.01	0.0143553	0.8318
100858699	XP_003640938.4	ribosomal RNA processing protein 36 homolog [Gallus gallus]	27.628	3.8	1	1	1
431192	XP_003640979.3	son of sevenless homolog 1 [Gallus gallus]	151.31	1.1	2	2	2	0.949	0.959	1.027	1.031	1.039	1.007	0.994	-0.00868224	0.88172
100859609	XP_003640982.3	serine/arginine-rich splicing factor 7 [Gallus gallus]	28.751	31.2	9	26	1	0.966	0.99	0.99	0.972	0.988	1.095	1.038	0.0538064	0.39156
421802	XP_003641061.1	NADH dehydrogenase [ubiquinone] 1 alpha subcomplex assembly factor 4 isoform X1 [Gallus gallus]	19.957	20.8	3	4	3	0.98	1.152	0.917	1.034	0.945	1.01	1.125	0.169925	0.0607
426928	XP_003641087.3	ectonucleotide pyrophosphatase/phosphodiesterase family member 3 [Gallus gallus]	100.79	23.5	18	28	18	1.011	0.904	1.109	0.9	1.092	0.93	0.851	-0.232769	0.006182
421986	XP_003641098.1	protein phosphatase 1G [Gallus gallus]	60.803	25.7	13	16	13	0.957	1.035	0.989	1.048	0.992	1.018	1.055	0.077243	0.0192046
421924	XP_003641111.2	kinase D-interacting substrate of 220 kDa isoform X6 [Gallus gallus]	191.35	1.9	3	4	3
422026	XP_003641120.1	kinesin-like protein KIF13B isoform X4 [Gallus gallus]	216.26	8.5	14	14	14	1.022	0.994	1.045	0.958	1.08	0.952	0.923	-0.115597	0.018545
421958	XP_003641123.1	WD repeat-containing protein 35 isoform X2 [Gallus gallus]	132.5	3.6	3	3	3
422347	XP_003641132.3	insulin receptor substrate 4 [Gallus gallus]	125.27	1.5	2	2	2
100859914	XP_003641142.1	60S ribosomal protein L36a [Gallus gallus]	12.417	34.9	7	13	7	0.952	1.126	0.972	1.064	0.909	1.007	1.128	0.173767	0.033622
422201	XP_003641144.1	lys-63-specific deubiquitinase BRCC36 [Gallus gallus]	29.812	16.5	4	5	4	0.965	1.037	1.009	1.004	0.991	0.946	1.007	0.0100637	0.83002
422220	XP_003641148.3	leucine-rich repeat and calponin homology domain-containing protein 2 isoform X6 [Gallus gallus]	82.275	1.1	1	1	1
422395	XP_003641173.1	synaptic functional regulator FMR1 isoform X2 [Gallus gallus]	61.838	19.2	9	11	1
771481	XP_003641242.1	Bardet-Biedl syndrome 7 protein [Gallus gallus]	79.915	5.2	3	3	3	1.005	0.95	0.995	0.985	1.126	0.959	0.926	-0.110916	0.139681
428807	XP_003641312.2	protease-associated domain-containing protein 1 [Gallus gallus]	22.281	10.1	2	2	2	0.834	1.139	1.029	0.977	0.913	1.104	1.16	0.214125	0.122556
770193	XP_003641334.3	carbohydrate sulfotransferase 14 [Gallus gallus]	46.72	18.7	7	8	7	0.978	1.05	0.948	1.054	0.936	1.037	1.097	0.133564	0.0026001
100857722	XP_003641376.2	protein SAAL1 [Gallus gallus]	52.404	21.2	8	11	8	0.981	0.955	1.006	0.995	1.006	0.988	0.982	-0.0262051	0.28718
428872	XP_003641440.1	acyl-coenzyme A thioesterase 1 isoform X1 [Gallus gallus]	51.172	6.4	2	3	2	0.999	0.871	0.996	0.907	1.167	1.07	0.901	-0.150401	0.2656
423046	XP_003641442.3	importin-7 [Gallus gallus]	119.43	24.7	21	32	20	0.961	1.002	0.985	1.017	1.023	1.038	1.03	0.0426443	0.2311
423769	XP_003641560.1	arachidonate 5-lipoxygenase isoform X1 [Gallus gallus]	78.464	17.2	10	14	10	0.987	0.938	1.023	1.042	1.042	0.972	0.967	-0.0484122	0.38288
424130	XP_003641617.1	oxysterol-binding protein-related protein 6 isoform X9 [Gallus gallus]	102.18	5.8	5	5	5	0.976	1.024	0.923	1.103	0.943	1.004	1.102	0.140124	0.043063
424048	XP_003641622.2	dynein heavy chain 7, axonemal [Gallus gallus]	459.16	0.3	1	1	1	0.839	1.029	0.904	1.194	0.984	1.06	1.204	0.267835	0.045536
429037	XP_003641693.1	beta-galactosidase-1-like protein isoform X1 [Gallus gallus]	70.212	1.9	1	4	1	1.074	0.957	1.058	0.956	1.033	0.937	0.9	-0.152003	0.00138329
424368	XP_003641719.4	UDP-N-acetylhexosamine pyrophosphorylase isoform X1 [Gallus gallus]	58.238	43.2	20	34	19	0.912	1.029	0.884	1.096	0.949	1.143	1.191	0.252173	0.0091358
424966	XP_003641820.1	mitochondrial import inner membrane translocase subunit TIM14 isoform X2 [Gallus gallus]	12.243	8.1	1	1	1	0.99	1.128	1.018	0.984	0.953	0.94	1.031	0.0440443	0.65906
424938	XP_003641839.3	solute carrier family 12 member 9 [Gallus gallus]	97.855	3.9	4	5	4	0.96	1.049	0.989	1.058	0.984	0.991	1.056	0.0786098	0.072918
769735	XP_003641852.1	cytochrome c oxidase subunit 5A, mitochondrial [Gallus gallus]	15.846	35	6	10	6	0.969	1.032	0.911	1.088	0.935	1.034	1.12	0.163499	0.0102616
415715	XP_003641964.2	solute carrier family 12 member 4 isoform X2 [Gallus gallus]	125.98	14.1	15	23	14	0.936	1.028	0.978	1.038	0.986	1.019	1.064	0.0894982	0.021822
429757	XP_003642018.2	transmembrane protein 115 [Gallus gallus]	37.844	4	1	1	1	1.006	0.941	0.93	1.07	0.949	1.105	1.08	0.111031	0.23922
100858727	XP_003642052.2	ubiquitin carboxyl-terminal hydrolase 19 isoform X7 [Gallus gallus]	152.13	6.2	5	5	5	0.913	1.033	1.053	0.98	0.976	1.049	1.041	0.0579701	0.42116
100859676	XP_003642101.3	vesicular integral-membrane protein VIP36 [Gallus gallus]	37.538	32.9	10	20	10	0.97	0.976	1.026	1.005	0.945	1.014	1.018	0.0257376	0.52568
100857973	XP_003642107.2	ganglioside GM2 activator [Gallus gallus]	21.424	19.3	5	8	5	0.995	0.973	0.995	1.007	1.058	0.984	0.972	-0.0409718	0.29278
771857	XP_003642151.1	cell division cycle protein 23 homolog isoform X1 [Gallus gallus]	67.7	9.9	5	5	5	1.021	0.965	0.986	0.816	1.013	1.189	0.983	-0.0247367	0.81892
771589	XP_003642171.3	inositol 1,4,5-trisphosphate receptor-interacting protein-like 2 [Gallus gallus]	54.197	2.4	1	1	1
416891	XP_003642230.3	iron-sulfur cluster assembly enzyme ISCU, mitochondrial [Gallus gallus]	16.672	32.9	4	6	4	1.007	0.971	1.05	0.963	1.045	0.976	0.938	-0.0923402	0.0098411
100857736	XP_003642240.1	translation initiation factor eIF-2B subunit alpha [Gallus gallus]	33.593	43.7	11	12	11	0.995	0.933	0.994	0.995	1.053	1.036	0.974	-0.0380063	0.50146
416992	XP_003642273.2	ATP-dependent RNA helicase DDX54 [Gallus gallus]	93.051	4.6	3	3	3	0.97	1.075	1.034	1.015	0.978	0.942	1.017	0.0243197	0.73654
417217	XP_003642306.1	dynamin-1 isoform X5 [Gallus gallus]	97.234	23.5	19	23	1
417388	XP_003642362.2	U3 small nucleolar RNA-associated protein 18 homolog [Gallus gallus]	66.495	15.3	9	10	9	0.986	0.992	0.988	1.038	1.024	1	1.011	0.015783	0.60008
770100	XP_003642373.2	tripartite motif-containing protein 47 [Gallus gallus]	74.043	22.2	14	17	14	1.131	0.873	1.135	0.838	1.183	0.854	0.744	-0.426625	9.6079e-05
417490	XP_003642445.1	eukaryotic translation initiation factor 4H isoform X1 [Gallus gallus]	27.635	31.5	7	11	7	0.908	1.033	0.953	1.065	0.993	1.059	1.106	0.145351	0.021025
417666	XP_003642463.1	28S ribosomal protein S23, mitochondrial [Gallus gallus]	22.087	41.8	6	8	6	0.987	0.985	1.053	0.989	0.974	0.991	0.984	-0.0232698	0.58004
417501	XP_003642469.2	nuclear pore complex protein Nup88 [Gallus gallus]	81.098	20.2	12	12	12	0.969	1.043	1.044	0.967	1.035	0.977	0.98	-0.0291463	0.57736
427832	XP_003642473.3	stromal cell-derived factor 2 [Gallus gallus]	27.443	20.5	4	6	4	1.055	1.026	1.087	0.987	0.891	1.007	0.996	-0.00578235	0.99208
419137	XP_003642499.1	endoplasmic reticulum-Golgi intermediate compartment protein 3 isoform X2 [Gallus gallus]	43.557	19.3	8	9	8	0.972	1.014	0.985	1.048	0.992	1.026	1.047	0.0662614	0.0154238
100859573	XP_003642537.3	minor histocompatibility antigen H13 isoform X2 [Gallus gallus]	40.447	18.5	7	12	7	0.988	1.055	0.939	1.028	0.913	1.053	1.104	0.14274	0.0154159
419448	XP_003642559.1	ubiquitin conjugation factor E4 B isoform X6 [Gallus gallus]	133.28	4.8	5	5	5	0.908	0.965	1.066	0.995	0.936	1.033	1.029	0.041243	0.59938
100859789	XP_003642584.3	phosphopantothenate--cysteine ligase isoform X1 [Gallus gallus]	32.967	47.9	11	20	11	0.986	0.969	0.972	1.031	1.095	1.003	0.984	-0.0232698	0.73006
100857984	XP_003642617.3	transmembrane protein 35B [Gallus gallus]	14.808	11.5	2	2	2	1.103	0.838	1.213	0.874	1.007	0.971	0.807	-0.309359	0.037219
419680	XP_003642632.3	adenylyl cyclase-associated protein 1 [Gallus gallus]	57.591	49.7	29	84	29	1.039	0.967	1.037	0.945	1.069	0.968	0.916	-0.12658	0.0021979
419755	XP_003642640.1	NLR family member X1 isoform X2 [Gallus gallus]	111.21	13	8	10	8	0.841	0.97	1.038	1.133	0.876	1.087	1.158	0.211635	0.134515
100859723	XP_003642721.3	phosphatidylinositol 4-kinase beta isoform X1 [Gallus gallus]	90.697	3.6	3	3	3	0.969	1.031	0.968	1.006	1.041	0.998	1.019	0.0271541	0.49574
427053	XP_003642731.1	exopolyphosphatase PRUNE1 [Gallus gallus]	45.779	7.8	3	4	3	0.928	1.076	1.076	0.981	1.035	0.92	0.98	-0.0291463	0.76014
100857796	XP_003642831.2	protein HEXIM1 [Gallus gallus]	32.139	6.3	2	3	2	0.943	1.02	0.898	1.138	0.952	1.056	1.151	0.202888	0.0195581
419987	XP_003642836.1	zinc finger protein 652 [Gallus gallus]	69.994	2.6	1	1	1
420021	XP_003642862.1	vacuolar protein-sorting-associated protein 25 isoform X2 [Gallus gallus]	20.404	25.9	4	4	4	0.889	1.013	1.006	1.086	1.041	0.981	1.049	0.0690147	0.43308
428313	XP_003642870.1	kelch-like protein 11 [Gallus gallus]	78.139	3.3	2	2	2
427013	XP_003642878.1	peptidyl-prolyl cis-trans isomerase FKBP10 [Gallus gallus]	62.353	46.6	23	105	22	0.972	1.055	0.966	1.048	0.961	1.018	1.077	0.107018	0.0029969
100859867	XP_003642885.1	39S ribosomal protein L54, mitochondrial [Gallus gallus]	13.802	29.8	2	2	2
427182	XP_003642959.1	junction-mediating and -regulatory protein [Gallus gallus]	101.76	6.1	4	4	4	1.032	1.063	0.96	0.918	0.991	1.041	1.013	0.0186342	0.83256
771459	XP_003642960.1	arylsulfatase B [Gallus gallus]	58.445	11.1	7	9	7	1.048	0.997	1.024	0.93	0.965	1.005	0.965	-0.0513992	0.36902
100859339	XP_003642967.1	atrial natriuretic peptide receptor 2 [Gallus gallus]	119.2	9.6	7	10	7	0.987	1.067	0.974	1.039	0.972	0.968	1.048	0.0676387	0.19228
100859407	XP_003642968.1	non-lysosomal glucosylceramidase [Gallus gallus]	96.065	7.3	4	5	4	1.012	1.05	1.055	0.939	0.989	0.965	0.967	-0.0484122	0.4189
427646	XP_003643003.1	AP-3 complex subunit beta-1 isoform X2 [Gallus gallus]	122.23	25.1	27	33	27	1.03	1.012	0.993	1.013	1.007	1.002	0.999	-0.00144342	0.94062
427447	XP_003643026.1	rapamycin-insensitive companion of mTOR [Gallus gallus]	192.2	1.9	3	3	3
100857227	XP_003643030.2	integrin alpha-2 isoform X1 [Gallus gallus]	129.63	1.4	1	1	1
431601	XP_003643050.1	E3 ubiquitin-protein ligase UHRF2 isoform X2 [Gallus gallus]	91.993	6.9	5	7	5	1.027	0.923	1.058	1.114	0.974	1.042	1.007	0.0100637	0.94894
427247	XP_003643063.1	MAM domain-containing protein 2 [Gallus gallus]	77.117	4.5	3	3	3	0.952	1.017	1.057	0.938	1.078	0.973	0.948	-0.077041	0.31352
415611	XP_003643094.1	alpha-mannosidase 2 [Gallus gallus]	131.99	18.8	17	19	16	1.041	1.003	1.018	0.989	0.962	1.018	0.996	-0.00578235	0.90496
100858972	XP_003643123.1	general transcription factor IIH subunit 2 isoform X1 [Gallus gallus]	44.731	7.1	3	4	3	0.977	0.99	0.979	1.108	0.947	1.009	1.07	0.0976108	0.140578
431639	XP_003643130.1	dnaJ homolog subfamily C member 25 [Gallus gallus]	41.592	11.6	3	3	3	1.016	1.088	1.002	1.044	0.869	0.987	1.08	0.111031	0.2408
100858057	XP_003643140.1	hydroxysteroid dehydrogenase-like protein 2 [Gallus gallus]	44.234	30.5	10	12	10	0.964	1.013	1.044	1.001	0.965	0.959	1	0	0.98972
770633	XP_003643150.1	LOW QUALITY PROTEIN: geranylgeranyl transferase type-1 subunit beta [Gallus gallus]	41.999	6.7	2	2	2
100858067	XP_003643199.3	potassium voltage-gated channel subfamily A member 6 [Gallus gallus]	68.594	1.6	1	1	1
422194	XP_003643366.1	transmembrane protein 35A [Gallus gallus]	18.582	21.4	3	3	3	0.964	1.1	0.899	1.161	0.877	1.02	1.197	0.259423	0.0187995
100859376	XP_003643470.1	prefoldin subunit 5 [Gallus gallus]	17.259	54.8	7	12	7	1.009	1.009	1.013	1.009	0.952	1.005	1.016	0.0229004	0.4929
425706	XP_003643479.3	LOW QUALITY PROTEIN: metal transporter CNNM4 [Gallus gallus]	86.288	6.9	5	5	5	0.969	1.036	0.98	1.019	0.961	1.014	1.055	0.077243	0.003503
100858240	XP_003643500.3	partner of Y14 and mago [Gallus gallus]	23.027	23.3	4	5	4	0.976	1.047	0.943	1.056	0.901	1.04	1.115	0.157044	0.0098637
417489	XP_003643634.4	linker for activation of T-cells family member 2 isoform X3 [Gallus gallus]	22.346	7.6	1	1	1	1.032	0.894	1.046	1.039	0.963	1.032	0.975	-0.0365259	0.6507
416961	XP_004934427.1	eukaryotic translation initiation factor 4E transporter isoform X4 [Gallus gallus]	101.99	4.6	3	3	3	1.027	1.08	0.943	1.113	0.965	0.948	1.07	0.0976108	0.29912
770178	XP_004934443.2	calcium-binding protein 1 isoform X2 [Gallus gallus]	24.881	6	1	1	1	0.646	1.122	0.85	0.829	0.988	1.527	1.4	0.485427	0.2113
417021	XP_004934529.3	AP-1 complex subunit beta-1 isoform X5 [Gallus gallus]	103.16	35.6	30	47	16	0.994	0.966	1.028	0.995	0.992	1.03	0.992	-0.011588	0.73688
417720	XP_004934796.1	armadillo repeat-containing protein 10 isoform X2 [Gallus gallus]	28.953	6.1	1	1	1
421185	XP_004934851.2	SRSF protein kinase 1 isoform X2 [Gallus gallus]	73.965	14.2	9	11	6	0.822	1.3	1.066	1.008	0.882	0.931	1.169	0.225275	0.29742
771476	XP_004934925.1	leiomodin-1 [Gallus gallus]	67.848	16.3	10	11	10	1.063	0.94	1.057	0.875	1.065	0.931	0.862	-0.21424	0.022239
419843	XP_004935012.1	SLIT-ROBO Rho GTPase-activating protein 2 isoform X4 [Gallus gallus]	121.05	25.1	21	22	18	0.97	1.054	0.962	1.023	0.933	1.074	1.1	0.137504	0.0067351
419889	XP_004935062.1	tetraspanin-2 [Gallus gallus]	24.505	4.1	1	3	1	1.125	1.003	0.97	0.976	0.993	0.947	0.948	-0.077041	0.34748
420980	XP_004935233.2	elongator complex protein 2 isoform X2 [Gallus gallus]	92.086	9.6	5	6	5	0.983	0.949	0.998	0.956	1.062	1.028	0.964	-0.0528949	0.34854
421311	XP_004935343.1	glycerophosphocholine phosphodiesterase GPCPD1 isoform X4 [Gallus gallus]	65.758	2.1	1	1	1
771345	XP_004935406.1	echinoderm microtubule-associated protein-like 4 isoform X2 [Gallus gallus]	109.55	10.8	10	12	9	0.783	1.191	0.818	1.224	0.781	1.167	1.504	0.588805	3.8468e-05
421470	XP_004935478.2	striatin isoform X4 [Gallus gallus]	83.444	8.9	6	6	4	1.008	1.068	1.054	0.907	1.008	0.966	0.958	-0.0619024	0.4179
421545	XP_004935554.1	tetratricopeptide repeat protein 13 isoform X3 [Gallus gallus]	93.235	8.6	5	5	5	0.932	1.002	1.094	0.977	0.951	1.045	1.016	0.0229004	0.75784
421568	XP_004935606.1	FGFR1 oncogene partner isoform X2 [Gallus gallus]	36.053	4.5	1	1	1
421633	XP_004935674.1	monofunctional C1-tetrahydrofolate synthase, mitochondrial isoform X1 [Gallus gallus]	101	33.9	25	38	25	0.981	1.031	1.043	0.999	0.982	0.98	1.001	0.00144197	0.95448
421666	XP_004935735.2	protein LTV1 homolog [Gallus gallus]	54.309	9.4	3	5	3	0.992	1.063	0.92	1.098	0.934	1.027	1.12	0.163499	0.0193805
770205	XP_004935739.1	costars family protein ABRACL isoform X1 [Gallus gallus]	9.0534	38.3	3	4	3	0.947	0.837	1.083	0.846	1.299	0.951	0.791	-0.33825	0.085962
422012	XP_004935931.3	protein EFR3 homolog B isoform X2 [Gallus gallus]	92.355	10.9	7	8	7	1.066	1.013	0.999	0.995	0.983	0.947	0.969	-0.0454314	0.38972
422697	XP_004936012.1	H/ACA ribonucleoprotein complex subunit 1 [Gallus gallus]	23.022	26.3	5	6	5	1.007	1.116	0.991	0.992	0.915	0.96	1.053	0.0745054	0.40558
100859761	XP_004936112.1	NF-X1-type zinc finger protein NFXL1 [Gallus gallus]	98.753	2	1	1	1	0.984	1.012	0.997	1.088	0.983	0.951	1.029	0.041243	0.55602
422878	XP_004936259.1	huntingtin isoform X2 [Gallus gallus]	342.46	3.2	9	10	9	1.056	0.998	1.066	0.971	0.974	0.946	0.942	-0.086201	0.140678
423480	XP_004936424.1	MAP/microtubule affinity-regulating kinase 3 isoform X16 [Gallus gallus]	81.206	9.1	6	7	2
423521	XP_004936499.1	CDK-activating kinase assembly factor MAT1 [Gallus gallus]	35.763	7.8	2	3	2
428930	XP_004936575.2	FERM domain-containing protein 6 isoform X2 [Gallus gallus]	70.217	5.4	3	3	3	0.904	0.954	1.013	1.082	1.001	1.054	1.059	0.0827026	0.33938
424500	XP_004936658.1	ecotropic viral integration site 5 protein homolog isoform X7 [Gallus gallus]	90.6	6.2	5	7	5	1.031	0.964	1.004	0.953	0.974	1.044	0.984	-0.0232698	0.6411
424642	XP_004936849.1	terminal uridylyltransferase 4 isoform X2 [Gallus gallus]	178.58	2.2	3	3	3	0.943	1.094	0.98	1.015	0.968	1.008	1.078	0.108357	0.059085
424761	XP_004937024.2	LOW QUALITY PROTEIN: rho guanine nucleotide exchange factor 4 [Gallus gallus]	257.52	0.8	2	2	2	0.923	1.067	1.058	1.018	0.913	1.024	1.074	0.102994	0.21194
424773	XP_004937128.2	U2 snRNP-associated SURP motif-containing protein isoform X2 [Gallus gallus]	112.88	14.5	13	17	13	0.982	1.046	0.989	1.021	0.963	0.983	1.04	0.0565835	0.123023
100858366	XP_004937143.1	nucleolar protein 6 [Gallus gallus]	128.99	18.1	14	15	14	0.995	1.018	1.021	1.028	0.929	0.961	1.021	0.0299829	0.57932
427431	XP_004937236.1	ankycorbin isoform X6 [Gallus gallus]	107.15	38.4	34	41	1	0.965	0.989	0.898	1.169	0.843	1.133	1.216	0.282143	0.039221
427434	XP_004937238.1	dnaJ homolog subfamily C member 21 isoform X2 [Gallus gallus]	62.606	4.1	2	3	2
427443	XP_004937254.1	nuclear pore complex protein Nup155 [Gallus gallus]	154.14	24.3	27	40	27	0.979	1.022	1.011	1.006	0.952	1.015	1.034	0.0482362	0.131022
427168	XP_004937349.1	splicing regulatory glutamine/lysine-rich protein 1 isoform X1 [Gallus gallus]	77.182	4.2	3	3	3	0.996	1.138	0.944	1.012	0.877	1.036	1.131	0.177599	0.074821
427209	XP_004937404.1	collagen type IV alpha-3-binding protein isoform X4 [Gallus gallus]	68.12	6	3	3	3	1.123	0.965	0.928	0.954	1.045	0.999	0.943	-0.0846703	0.38122
396174	XP_004937428.2	microtubule-associated protein 1B [Gallus gallus]	275.11	24.8	50	69	50	1.102	0.937	1.075	0.889	1.094	0.911	0.837	-0.2567	0.00045681
418435	XP_004937514.1	MICOS complex subunit MIC19 isoform X4 [Gallus gallus]	27.319	43.6	13	15	13	0.96	1.015	1.012	1.026	0.988	1.034	1.039	0.0551957	0.076822
417802	XP_004937606.1	anoctamin-6 isoform X2 [Gallus gallus]	100.19	4	3	3	3	0.725	1.238	0.734	1.363	0.73	1.202	1.737	0.796598	0.0047567
417911	XP_004937694.1	vezatin isoform X8 [Gallus gallus]	74.738	3.2	1	1	1
417926	XP_004937711.1	apoptotic protease-activating factor 1 isoform X3 [Gallus gallus]	62.531	3	1	2	1
417933	XP_004937716.1	small subunit processome component 20 homolog [Gallus gallus]	319.5	7.4	16	19	16	0.976	0.993	1.001	1.013	1.002	0.992	1.006	0.00863031	0.59204
418000	XP_004937767.1	histone acetyltransferase p300 [Gallus gallus]	268.19	3.9	8	9	6	0.955	1.045	0.991	0.938	1.122	0.966	0.961	-0.0573917	0.54896
418002	XP_004937768.1	probable Xaa-Pro aminopeptidase 3 [Gallus gallus]	50.49	2.9	1	2	1	1.161	1.114	1.211	0.83	0.516	1.134	1.066	0.0922074	0.6991
418010	XP_004937788.2	trinucleotide repeat-containing gene 6B protein isoform X9 [Gallus gallus]	186.53	2.6	3	3	3	0.921	1.023	0.893	1	1.012	1.151	1.123	0.167358	0.115018
418034	XP_004937795.1	ankyrin repeat domain-containing protein 54 isoform X2 [Gallus gallus]	25.945	10.4	2	2	2	0.958	1.044	0.965	1.031	0.905	1.094	1.121	0.164786	0.0137556
771356	XP_004937833.1	eukaryotic translation initiation factor 3 subunit D isoform X2 [Gallus gallus]	63.829	43.7	16	29	16	0.985	1.046	0.937	1.01	0.977	1.009	1.057	0.0799754	0.045815
772197	XP_004938004.1	mRNA-decapping enzyme 1B [Gallus gallus]	66.421	1.5	1	1	1
418263	XP_004938140.1	tetraspanin-9 isoform X4 [Gallus gallus]	26.826	4.6	1	2	1	0.977	1.062	0.977	1.05	0.949	0.995	1.07	0.0976108	0.038783
426085	XP_004938144.1	tubby-related protein 3 isoform X2 [Gallus gallus]	48.19	8.9	3	3	3	1.058	0.975	1.042	0.959	1.094	0.894	0.885	-0.176251	0.0155643
425913	XP_004938213.2	LOW QUALITY PROTEIN: ganglioside-induced differentiation-associated protein 2 [Gallus gallus]	56.056	5.3	2	2	2	0.971	1.136	0.913	0.919	1.034	1.036	1.059	0.0827026	0.48138
418335	XP_004938236.1	glycogen synthase kinase-3 beta isoform X2 [Gallus gallus]	46.837	41	15	18	15	1.063	0.942	1.022	0.915	1.053	0.972	0.902	-0.148801	0.0079194
418406	XP_004938335.1	E3 ubiquitin-protein ligase CBL-B isoform X2 [Gallus gallus]	109.48	1.3	1	1	1
418456	XP_004938388.1	B-cell CLL/lymphoma 9 protein isoform X3 [Gallus gallus]	147.75	1.1	1	1	1
418477	XP_004938427.1	ATP synthase-coupling factor 6, mitochondrial [Gallus gallus]	12.36	52.3	9	18	9	0.978	0.978	1.006	1.05	0.989	1.017	1.024	0.0342157	0.34658
428014	XP_004938579.1	GRIP and coiled-coil domain-containing protein 2 isoform X1 [Gallus gallus]	196.15	12	16	18	16	1.01	1.043	0.975	1.008	1.001	0.995	1.02	0.0285692	0.32312
418744	XP_004938591.1	cullin-4A isoform X2 [Gallus gallus]	88.057	12.5	9	11	5	1.027	0.971	0.919	0.975	1.05	1.003	0.984	-0.0232698	0.75428
418750	XP_004938592.1	gamma-tubulin complex component 3 isoform X2 [Gallus gallus]	103.55	9.9	9	11	9	0.954	1.057	1.108	0.918	0.927	1.028	1.005	0.0071955	0.93652
418755	XP_004938594.1	ATP-dependent (S)-NAD(P)H-hydrate dehydratase isoform X4 [Gallus gallus]	36.525	10.4	3	4	3	1.179	0.918	1.005	0.816	1.022	1.063	0.872	-0.1976	0.2024
418761	XP_004938602.1	rho guanine nucleotide exchange factor 7 isoform X4 [Gallus gallus]	88.264	7.1	5	6	2	1.066	1.103	0.979	0.927	0.887	1.038	1.046	0.0648829	0.56918
418804	XP_004938670.1	RNA-binding protein 26 isoform X5 [Gallus gallus]	111.1	6.1	5	5	4	0.986	0.989	0.994	1.026	1.003	1.011	1.014	0.0200577	0.29304
418820	XP_004938709.1	progesterone-induced-blocking factor 1 isoform X2 [Gallus gallus]	78.36	1.4	1	1	1	1.027	1.029	1.059	0.931	1.02	0.947	0.936	-0.0954196	0.111982
769506	XP_004938729.1	diacylglycerol kinase eta isoform X4 [Gallus gallus]	117.3	2.8	2	2	2	0.793	1.102	0.765	1.267	0.864	1.205	1.476	0.561693	0.0020399
418859	XP_004938759.1	mediator of RNA polymerase II transcription subunit 4 [Gallus gallus]	28.679	6.5	1	1	1	0.914	1.216	1.087	0.979	0.893	0.919	1.076	0.105678	0.5425
418899	XP_004938803.1	regulatory factor X-associated protein [Gallus gallus]	29.068	5.6	1	1	1	1.101	0.941	1.073	0.997	1.033	0.876	0.877	-0.189351	0.034301
428075	XP_004938819.2	beta-1,3-glucosyltransferase [Gallus gallus]	69.892	6.6	3	4	3	0.904	1.106	0.941	1.044	0.875	1.086	1.19	0.250962	0.0030179
419003	XP_004938928.1	centrosomal protein of 295 kDa isoform X3 [Gallus gallus]	212.88	0.4	1	1	1
419021	XP_004938950.3	pre-mRNA cleavage complex 2 protein Pcf11 isoform X3 [Gallus gallus]	181.9	3.5	4	4	4	1.03	0.997	0.973	1.018	0.916	1.008	1.036	0.051024	0.35294
428121	XP_004939001.1	leucine-rich repeat-containing protein 32 [Gallus gallus]	76.188	11.2	7	8	7	1.065	0.865	1.253	0.881	1.167	0.797	0.73	-0.454032	0.0050571
420392	XP_004939139.1	coiled-coil domain-containing protein 13 isoform X2 [Gallus gallus]	78.367	2.2	1	1	1	1.023	0.85	1.048	0.987	1.099	1.006	0.897	-0.15682	0.124159
420416	XP_004939176.1	1-phosphatidylinositol 4,5-bisphosphate phosphodiesterase delta-1 isoform X4 [Gallus gallus]	87.25	26.6	15	22	15	0.983	1.021	0.985	1.006	1.016	0.992	1.012	0.0172093	0.43606
420653	XP_004939466.1	ubiquitin-conjugating enzyme E2 E1 isoform X1 [Gallus gallus]	21.377	14.5	2	2	2
420713	XP_004939522.2	serine/threonine-protein kinase ULK4 isoform X3 [Gallus gallus]	142.79	0.8	1	1	1
421036	XP_004939781.2	AFG3-like protein 2 isoform X4 [Gallus gallus]	89.262	24.7	20	26	20	1.013	1.032	0.987	1.018	0.97	0.981	1.021	0.0299829	0.36182
425903	XP_004939794.1	serine/threonine-protein phosphatase 4 regulatory subunit 1 isoform X11 [Gallus gallus]	100.1	13.5	8	10	8	0.934	0.96	1.038	1.008	1.043	1.041	0.998	-0.00288828	0.97798
421069	XP_004939827.2	E3 ubiquitin-protein ligase MIB1 isoform X3 [Gallus gallus]	108.9	1.7	2	3	2
421076	XP_004939840.2	NPC intracellular cholesterol transporter 1 isoform X1 [Gallus gallus]	142.17	10	11	15	11	1.041	0.986	1.053	1.004	1.031	0.993	0.955	-0.0664274	0.0044801
420199	XP_004939993.1	inositol monophosphatase 1 isoform X3 [Gallus gallus]	30.142	32.4	9	11	9	1.046	0.925	1.009	0.929	1.11	0.99	0.899	-0.153607	0.039558
420224	XP_004940003.1	meckelin isoform X2 [Gallus gallus]	106.35	3.7	3	3	3	1.039	1.006	1.025	1.01	0.962	0.969	0.986	-0.0203404	0.651
770677	XP_004940087.2	putative deoxyribonuclease TATDN1 isoform X3 [Gallus gallus]	31.974	14.9	3	3	3	0.97	0.996	0.996	0.939	1	1.098	1.023	0.0328061	0.68508
768713	XP_004940124.1	protein tyrosine phosphatase type IVA 3 isoform X1 [Gallus gallus]	19.747	4.6	1	1	1
426292	XP_004940153.3	LOW QUALITY PROTEIN: extracellular signal-regulated kinase 2 [Gallus gallus]	64.541	1.4	1	1	1	0.973	1.005	0.956	1.006	1.045	1.027	1.022	0.0313952	0.47786
426680	XP_004940166.2	serine/threonine-protein phosphatase 4 regulatory subunit 3B isoform X3 [Gallus gallus]	90.547	10.2	7	8	3	0.946	1.098	0.962	1.11	0.912	0.983	1.132	0.178874	0.043218
100857144	XP_004940169.1	serine/threonine-protein kinase VRK2 isoform X2 [Gallus gallus]	61.144	9.1	4	4	4	0.971	1.091	1.061	0.968	0.948	0.969	1.016	0.0229004	0.78134
101752029	XP_004940194.1	thrombomodulin [Gallus gallus]	58.868	2.4	1	2	1	1.02	0.97	1.154	1.102	0.898	0.872	0.958	-0.0619024	0.69408
769965	XP_004940204.1	kinesin light chain 4 isoform X2 [Gallus gallus]	70.227	34.1	21	31	11	1.006	1.041	0.996	1.012	1.007	0.98	1.008	0.0114956	0.68928
101748994	XP_004940253.2	tRNA (adenine(58)-N(1))-methyltransferase, mitochondrial isoform X2 [Gallus gallus]	47.642	3.3	1	1	1	1.045	0.993	0.957	1.112	0.911	0.992	1.063	0.0881416	0.32824
426929	XP_004940275.3	ectonucleotide pyrophosphatase/phosphodiesterase family member 1 [Gallus gallus]	103.26	14	10	13	10	1.116	0.929	1.122	0.932	1.103	0.837	0.808	-0.307573	0.026443
421811	XP_004940443.1	midasin isoform X2 [Gallus gallus]	632.65	2.9	13	14	13	0.948	1.028	0.997	0.943	0.994	1.053	1.029	0.041243	0.49906
421819	XP_004940448.1	mRNA-capping enzyme isoform X2 [Gallus gallus]	62.539	1.5	1	1	1	1.038	1.03	0.909	1.037	0.943	1.049	1.078	0.108357	0.194115
421844	XP_004940476.1	inhibitor of Bruton tyrosine kinase isoform X3 [Gallus gallus]	145.27	2.9	3	3	3
100858913	XP_004940502.1	stromal membrane-associated protein 1 isoform X2 [Gallus gallus]	48.258	13.6	5	7	5	1.021	0.98	1.009	0.98	1.001	1.038	0.989	-0.0159576	0.60292
422181	XP_004940659.1	phosphorylase b kinase regulatory subunit alpha, skeletal muscle isoform isoform X6 [Gallus gallus]	122.64	3.4	3	4	3	1.029	1.011	1.084	0.852	1.009	1.018	0.923	-0.115597	0.2509
422238	XP_004940730.1	motile sperm domain-containing protein 1 isoform X2 [Gallus gallus]	24.424	10.6	2	2	2	0.92	1.042	0.949	1.077	0.963	1.054	1.12	0.163499	0.0023626
425504	XP_004940827.1	BTB/POZ domain-containing protein KCTD12 [Gallus gallus]	32.664	3.4	1	1	1	0.863	1.124	1.017	0.989	0.908	1.094	1.15	0.201634	0.08626
422360	XP_004940885.1	cohesin subunit SA-2 isoform X5 [Gallus gallus]	143.91	9.9	12	13	8	1	0.962	1.017	1.014	0.97	1.032	1.007	0.0100637	0.80222
772225	XP_004940900.2	ADP/ATP translocase 2 [Gallus gallus]	32.864	52.3	18	37	4	0.957	1.027	1.014	1.053	0.941	1.036	1.07	0.0976108	0.045623
100857197	XP_004940951.1	uncharacterized protein LOC100857197 isoform X2 [Gallus gallus]	69.965	25	15	18	15	0.981	0.989	1.029	1.005	0.998	1.007	0.998	-0.00288828	0.89278
422418	XP_004940967.1	rap guanine nucleotide exchange factor 2 isoform X11 [Gallus gallus]	166.39	3.2	4	4	4	1.001	0.97	0.981	1.031	0.938	1.077	1.054	0.0758749	0.22014
422432	XP_004940987.2	H(+)/Cl(-) exchange transporter 3 isoform X2 [Gallus gallus]	87.84	3.4	2	2	2
422457	XP_004941010.1	SWI/SNF-related matrix-associated actin-dependent regulator of chromatin subfamily A member 5 isoform X2 [Gallus gallus]	116.69	11.9	13	14	5	0.917	1.115	0.964	0.976	0.923	1.019	1.109	0.149259	0.072682
769372	XP_004941128.1	CDKN2A-interacting protein [Gallus gallus]	68.404	3.2	2	2	2
422651	XP_004941242.1	ankyrin repeat domain-containing protein 17 isoform X5 [Gallus gallus]	235.27	5.1	9	11	1
422660	XP_004941250.1	UDP-glucuronosyltransferase 2C1 isoform X2 [Gallus gallus]	60.643	13.2	6	9	2	0.699	1.125	0.75	1.316	0.816	1.283	1.644	0.71721	0.00167573
422665	XP_004941261.2	spermatogenesis-associated protein 5 isoform X4 [Gallus gallus]	98.957	8.1	6	8	5	0.869	1.072	1.004	1.037	0.939	1.079	1.134	0.181421	0.043165
428865	XP_004941649.1	rho GTPase-activating protein 1 isoform X2 [Gallus gallus]	50.4	29.5	12	17	12	1.066	0.868	1.068	0.895	1.138	0.931	0.823	-0.281036	0.0027624
423217	XP_004941685.1	RNA polymerase II-associated protein 1 isoform X2 [Gallus gallus]	152.67	3.7	4	4	4	1.087	0.975	0.985	1.015	0.912	1.032	1.013	0.0186342	0.79374
101749626	XP_004942042.1	CWF19-like protein 1 [Gallus gallus]	59.966	19.2	10	13	10	0.981	1.017	0.97	1.033	1.017	1	1.028	0.0398403	0.184178
423676	XP_004942053.1	ATPase family AAA domain-containing protein 1 [Gallus gallus]	41.075	9.7	3	3	3	0.93	1.109	0.97	1.128	0.956	0.925	1.107	0.146655	0.20436
423692	XP_004942067.1	cell division cycle and apoptosis regulator protein 1 isoform X5 [Gallus gallus]	126.83	13.2	12	17	12	1.029	1.038	0.997	1	0.97	0.993	1.012	0.0172093	0.62122
769373	XP_004942097.1	peroxisomal leader peptide-processing protease isoform X2 [Gallus gallus]	44.901	4.8	1	1	1	0.891	0.939	0.91	1.008	1.176	1.089	1.02	0.0285692	0.80596
423755	XP_004942151.1	nucleolar and coiled-body phosphoprotein 1 isoform X2 [Gallus gallus]	72.218	7.8	6	8	6	0.972	1.025	0.992	1.067	0.781	1.057	1.147	0.197865	0.2066
423814	XP_004942214.3	LOW QUALITY PROTEIN: insulin-degrading enzyme [Gallus gallus]	117.79	22.3	22	33	22	1.047	0.962	1.023	0.974	1.056	0.961	0.927	-0.109359	0.00187884
423878	XP_004942323.1	STE20-like serine/threonine-protein kinase isoform X3 [Gallus gallus]	141.9	22.7	27	33	26	1.031	0.997	1.043	0.955	1.005	0.968	0.948	-0.077041	0.034125
[truncated: 3,428 more rows]
