# Supplementary material for: Integrated Transcriptomic and Proteomic Analyses of the Interaction Between Chicken Synovial Fibroblasts and Mycoplasma synoviae
Source: Front Microbiol. 2020 Apr 3;11:576. doi: 10.3389/fmicb.2020.00576 (PMC7147270; doi:10.3389/fmicb.2020.00576)
Supplement: Supplementary file 10 [file Table_9.XLSX]

## Sheet: Table S9
Supplementary Table S9. PPI networks of DEPs
Degree	Gene ID	Protein accession	Protein description	Ratio	Log2Ratio	Regulated Type	p value	MW [kDa]	Coverage [%]	Peptides	PSMs	Unique peptides	Mock1	Infected1	Mock2	Infected2	Mock3	Infected3
14	395337	NP_989959.1	interleukin-6 precursor [Gallus gallus]	4.093	2.03316	Up	2.24e-05	26.79	25.3	7	8	7	0.413	1.625	0.414	1.739	0.36	1.494
10	395387	NP_989998.1	matrix metalloproteinase-9 precursor [Gallus gallus]	1.716	0.77905	Up	0.000243	76.679	3.2	2	3	2	0.706	1.261	0.791	1.212	0.704	1.303
9	396497	NP_990831.2	cystatin precursor [Gallus gallus]	0.606	-0.72261	Down	3.85e-05	16.294	35.1	4	8	4	1.242	0.775	1.281	0.726	1.215	0.764
8	396536	NP_990856.1	apolipoprotein A-I preproprotein [Gallus gallus]	1.471	0.556797	Up	0.001956	30.68	49.6	15	21	15	0.778	1.178	0.813	1.277	0.805	1.069
7	429089	NP_001026734.1	protein CYR61 precursor [Gallus gallus]	0.73	-0.454032	Down	0.00148162	40.651	20.5	8	9	8	1.079	0.868	1.228	0.846	1.177	0.828
6	415494	NP_001264040.1	lactadherin isoform 2 precursor [Gallus gallus]	0.721	-0.471929	Down	0.000625	52.45	23.7	11	18	11	1.133	0.862	1.207	0.796	1.17	0.871
6	395349	NP_989969.2	follistatin-related protein 1 precursor [Gallus gallus]	0.733	-0.448115	Down	0.000202	35.811	25.4	8	9	8	1.127	0.875	1.169	0.813	1.145	0.835
6	417892	NP_001025918.1	decorin precursor [Gallus gallus]	1.374	0.458382	Up	0.0024805	39.686	55.2	16	53	16	0.822	1.093	0.897	1.229	0.808	1.15
6	395347	NP_989967.1	matrix remodeling-associated protein 8 precursor [Gallus gallus]	0.601	-0.734563	Down	4.34e-05	50.703	23.1	11	14	11	1.227	0.725	1.283	0.769	1.279	0.782
5	396495	NP_990829.1	interleukin-8 precursor [Gallus gallus]	4.883	2.28777	Up	4.3e-05	11.056	33	3	3	3	0.273	1.362	0.272	1.522	0.344	1.457
5	395196	NP_989855.1	interleukin-1 beta [Gallus gallus]	1.984	0.988412	Up	0.000857	29.822	3.7	1	1	1	0.602	1.46	0.729	1.299	0.675	1.221
4	396451	NP_001161191.1	prostaglandin G/H synthase 2 isoform 1 precursor [Gallus gallus]	2.091	1.06419	Up	8.29e-05	69.112	31.3	17	22	17	0.67	1.254	0.654	1.438	0.625	1.384
4	396500	NP_001161198.1	proto-oncogene c-Rel [Gallus gallus]	1.647	0.719841	Up	0.000222	66.904	22.1	10	13	9	0.794	1.224	0.764	1.273	0.7	1.223
4	548626	NP_001017413.1	pentraxin-related protein PTX3 precursor [Gallus gallus]	2.566	1.35952	Up	9.8e-05	47.384	30	11	22	11	0.589	1.383	0.571	1.589	0.527	1.356
4	422660	XP_015131876.1	UDP-glucuronosyltransferase 2A2 isoform X3 [Gallus gallus]	2.36	1.23879	Up	0.0029781	85.004	15.6	9	12	5	0.594	1.352	0.589	1.537	0.603	1.326
4	373978	NP_989495.1	collagen alpha-1(XVIII) chain precursor [Gallus gallus]	0.728	-0.45799	Down	0.037122	137.4	2.5	3	3	3	1.024	0.955	1.305	0.734	1.153	0.847
3	422234	XP_015133935.1	glypican-4 [Gallus gallus]	0.618	-0.694321	Down	6.35e-05	63.086	35.3	18	36	18	1.188	0.762	1.253	0.747	1.281	0.791
3	374209	NP_989646.1	integrin beta-3 precursor [Gallus gallus]	1.71	0.773996	Up	0.000282	86.115	30.5	19	29	19	0.75	1.263	0.786	1.299	0.681	1.229
3	418378	XP_015151511.1	collagen alpha-1(VIII) chain isoform X1 [Gallus gallus]	0.73	-0.454032	Down	0.022077	72.628	7.3	4	5	4	1.116	0.917	1.037	0.827	1.337	0.805
3	771022	NP_001289121.1	small VCP/p97-interacting protein [Gallus gallus]	0.706	-0.50226	Down	0.000357	8.7901	48.8	4	7	4	1.11	0.85	1.201	0.807	1.206	0.825
3	417802	XP_004937606.1	anoctamin-6 isoform X2 [Gallus gallus]	1.737	0.796598	Up	0.0047567	100.19	4	3	3	3	0.725	1.238	0.734	1.363	0.73	1.202
3	423079	XP_015142148.1	serum amyloid A protein [Gallus gallus]	3.031	1.59979	Up	3.96e-05	14.192	28.3	5	8	5	0.499	1.376	0.475	1.643	0.514	1.491
3	422637	XP_015131917.1	starch-binding domain-containing protein 1 isoform X1 [Gallus gallus]	0.666	-0.586406	Down	0.000399	38.87	27.5	8	13	8	1.243	0.82	1.127	0.764	1.221	0.809
3	420895	XP_025003036.1	serpin B6 isoform X1 [Gallus gallus]	1.434	0.520045	Up	0.0086621	43.1	16.6	5	6	5	0.806	1.045	0.816	1.342	0.843	1.149
3	414832	NP_001001751.1	cytochrome P450 family 3 subfamily A member 5 [Gallus gallus]	2.908	1.54003	Up	0.000339	58.217	5.7	3	3	3	0.501	1.459	0.53	1.732	0.501	1.264
3	425524	XP_004943764.2	chondroitin sulfate proteoglycan 4 [Gallus gallus]	0.753	-0.409278	Down	4.23e-05	258.04	25.8	49	75	49	1.117	0.876	1.162	0.853	1.15	0.852
3	374135	NP_989605.1	connective tissue growth factor precursor [Gallus gallus]	0.584	-0.77596	Down	0.00012	37.499	30.5	9	10	9	1.251	0.77	1.3	0.692	1.258	0.763
3	424315	NP_001032926.2	tumor necrosis factor-inducible gene 6 protein precursor [Gallus gallus]	2.949	1.56023	Up	8.22e-05	30.751	40.7	9	17	9	0.567	1.46	0.48	1.586	0.471	1.431
3	421218	NP_001006393.2	proteasome activator complex subunit 4 [Gallus gallus]	1.841	0.88049	Up	0.00133556	199.08	3.4	5	5	5	0.777	1.194	0.655	1.245	0.669	1.429
3	395964	XP_015136785.1	catenin beta-1 isoform X2 [Gallus gallus]	1.37	0.454176	Up	0.00102064	78.529	24.4	15	19	12	0.86	1.182	0.899	1.196	0.803	1.132
2	100858419	XP_015155713.1	NF-kappa-B inhibitor beta [Gallus gallus]	0.608	-0.717857	Down	0.000125	33.159	5.8	3	3	3	1.308	0.772	1.27	0.745	1.173	0.762
2	422792	NP_001012599.1	UDP-glucose 6-dehydrogenase [Gallus gallus]	1.364	0.447844	Up	0.00038	55.064	57.3	25	98	25	0.883	1.136	0.81	1.176	0.833	1.133
2	771557	NP_001074356.1	endoglin precursor [Gallus gallus]	1.315	0.395063	Up	0.022798	70.824	4.3	2	2	2	0.888	1.171	0.957	1.142	0.744	1.091
2	395666	NP_990191.2	CD44 antigen precursor [Gallus gallus]	1.517	0.601221	Up	5.67e-05	43.191	19.9	8	11	8	0.799	1.194	0.819	1.238	0.768	1.187
2	426962	XP_424573.3	glutamine--fructose-6-phosphate aminotransferase [isomerizing] 2 isoform X3 [Gallus gallus]	1.508	0.592636	Up	0.000124	77.072	38.7	22	30	19	0.778	1.19	0.835	1.18	0.765	1.215
2	386574	NP_989744.1	nuclear factor NF-kappa-B p100 subunit [Gallus gallus]	1.925	0.944858	Up	1.83e-05	99.401	7.5	6	6	5	0.678	1.275	0.706	1.372	0.67	1.306
2	421885	XP_419902.3	collagen alpha-1(XXI) chain [Gallus gallus]	2.751	1.45996	Up	0.00134009	99.81	4.5	4	4	4	0.585	1.186	0.522	1.757	0.486	1.439
2	374062	NP_001025508.1	frizzled-1 precursor [Gallus gallus]	0.707	-0.500218	Down	0.013244	65.49	8.4	5	6	3	1.045	0.872	1.195	0.867	1.236	0.717
2	427687	XP_025005030.1	"1-phosphatidylinositol 4,5-bisphosphate phosphodiesterase beta-1 isoform X4 [Gallus gallus]"	1.518	0.602172	Up	3.81e-06	132.06	11.9	12	13	12	0.785	1.211	0.814	1.21	0.812	1.239
2	422662	XP_420616.4	sulfotransferase 1 family member D1 [Gallus gallus]	1.694	0.760434	Up	0.00132169	34.36	34.7	8	14	8	0.702	1.117	0.759	1.286	0.764	1.366
2	421352	NP_001026216.2	transforming growth factor beta-2 precursor [Gallus gallus]	1.671	0.740712	Up	0.000339	47.622	14.3	6	6	6	0.752	1.251	0.765	1.327	0.717	1.154
2	417891	NP_001263286.1	lumican precursor [Gallus gallus]	0.687	-0.541618	Down	2.25e-05	38.642	14.9	5	7	5	1.16	0.811	1.214	0.835	1.204	0.811
2	424953	XP_015147015.1	eukaryotic translation initiation factor 4 gamma 1 isoform X1 [Gallus gallus]	1.342	0.424385	Up	0.0155959	181.78	30.7	52	82	3	0.877	1.008	0.868	1.275	0.815	1.153
1	421032	XP_419118.1	inositol monophosphatase 2 [Gallus gallus]	1.42	0.505891	Up	8.23e-05	31.88	20.2	6	6	6	0.827	1.152	0.85	1.2	0.799	1.165
1	373946	NP_989477.1	integrin alpha-3 precursor [Gallus gallus]	0.716	-0.481969	Down	9.63e-05	113.77	15.4	15	21	15	1.144	0.844	1.167	0.81	1.197	0.856
1	448832	NP_001004768.1	cell surface glycoprotein MUC18 precursor [Gallus gallus]	0.754	-0.407364	Down	0.0130021	69.074	12	6	8	6	1.001	0.876	1.171	0.874	1.198	0.791
1	395429	XP_015133102.1	periostin isoform X8 [Gallus gallus]	0.67	-0.577767	Down	0.000898	87.789	12	8	8	8	1.201	0.86	1.269	0.784	1.14	0.775
1	768406	XP_015144935.1	signal transducer and activator of transcription 4 isoform X1 [Gallus gallus]	1.556	0.637842	Up	0.003401	85.695	1.6	1	1	1	0.699	1.106	0.81	1.264	0.833	1.275
1	418107	XP_015141007.1	3-oxo-5-beta-steroid 4-dehydrogenase isoform X1 [Gallus gallus]	0.733	-0.448115	Down	0.023842	32.707	15.3	4	4	4	1.107	0.839	1.063	0.765	1.305	0.944
1	374044	NP_989543.1	hexokinase-2 [Gallus gallus]	1.303	0.381837	Up	1.81e-05	102.42	37.1	32	53	29	0.865	1.113	0.88	1.14	0.863	1.145
1	373900	NP_989442.2	UTP--glucose-1-phosphate uridylyltransferase [Gallus gallus]	1.764	0.818851	Up	0.000223	56.834	49	26	57	26	0.743	1.173	0.696	1.346	0.72	1.289
1	421862	XP_419879.4	CD109 antigen [Gallus gallus]	0.726	-0.461959	Down	0.0017758	161.69	7.5	8	9	8	1.21	0.796	1.111	0.889	1.199	0.87
1	421702	NP_001034377.1	pantetheinase precursor [Gallus gallus]	2.326	1.21785	Up	7.88e-05	55.399	19.4	8	12	8	0.646	1.363	0.568	1.477	0.579	1.331
1	418549	NP_001265013.1	pyridoxal kinase isoform 1 [Gallus gallus]	2.404	1.26544	Up	0.0025629	35.015	34.7	8	13	8	0.586	1.043	0.537	1.573	0.57	1.454
1	414837	XP_015139539.1	thrombospondin-2 isoform X2 [Gallus gallus]	1.479	0.564622	Up	0.029218	131.82	3	3	3	3	0.895	1.07	0.876	1.284	0.642	1.215
1	396489	NP_990824.1	glutamine synthetase [Gallus gallus]	4.344	2.11902	Up	2.2e-05	42.146	24.9	10	15	10	0.382	1.427	0.374	1.768	0.358	1.644
1	416093	XP_004944747.1	eukaryotic translation initiation factor 4E type 3 isoform X2 [Gallus gallus]	1.406	0.491597	Up	0.000438	13.437	9.3	1	1	1	0.873	1.173	0.833	1.15	0.784	1.178
1	420928	XP_419013.1	carboxymethylenebutenolidase homolog isoform X1 [Gallus gallus]	3.451	1.78701	Up	9.71e-05	28.17	33.1	9	12	9	0.479	1.408	0.474	1.692	0.401	1.572
1	395560	NP_990113.1	neuropilin-1 precursor [Gallus gallus]	1.366	0.449957	Up	0.00104038	102.48	15.2	11	12	11	0.815	1.12	0.903	1.177	0.82	1.17
1	386585	NP_989752.1	COUP transcription factor 2 [Gallus gallus]	0.663	-0.592919	Down	1.9e-05	45.427	13.4	5	5	4	1.228	0.81	1.231	0.793	1.172	0.804
1	408047	NP_001001315.2	thymosin beta-4 [Gallus gallus]	0.739	-0.436354	Down	0.04614	5.0526	45.5	4	7	4	1.106	0.719	1.053	0.86	1.293	0.972
1	396185	NP_990584.1	CCAAT/enhancer-binding protein beta [Gallus gallus]	1.682	0.750178	Up	4.27e-05	35.03	38.1	9	13	9	0.774	1.26	0.74	1.282	0.718	1.212
1	373997	NP_989508.1	L-lactate dehydrogenase B chain [Gallus gallus]	1.33	0.411426	Up	0.0064049	36.318	29.7	11	31	11	0.891	1.057	0.795	1.16	0.889	1.208
1	419019	XP_015135785.1	"NADP-dependent malic enzyme, mitochondrial isoform X2 [Gallus gallus]"	1.433	0.519039	Up	0.002644	60.49	6.8	4	5	2	0.782	1.09	0.846	1.284	0.837	1.158
1	395138	XP_025008359.1	"type 2 lactosamine alpha-2,3-sialyltransferase isoform X8 [Gallus gallus]"	2.485	1.31325	Up	0.000637	34.494	4	1	1	1	0.596	1.344	0.641	1.46	0.474	1.447
1	396277	NP_990666.1	transthyretin isoform 1 precursor [Gallus gallus]	0.634	-0.657445	Down	0.02066	16.309	36.7	4	6	4	1.045	0.797	1.474	0.684	1.16	0.853
1	395688	NP_990206.1	tyrosine-protein phosphatase non-receptor type 1 [Gallus gallus]	1.346	0.428678	Up	0.000723	50.333	30.4	12	15	12	0.81	1.152	0.834	1.118	0.897	1.149
1	396483	NP_990818.1	metalloproteinase inhibitor 3 precursor [Gallus gallus]	0.491	-1.02621	Down	0.000204	24.504	19.8	5	6	5	1.29	0.701	1.314	0.611	1.451	0.678
1	430997	XP_025003110.1	polyadenylate-binding protein 1 isoform X1 [Gallus gallus]	1.337	0.418999	Up	0.030518	70.539	35.5	23	57	2	0.93	1.227	0.89	1.192	0.748	1.015
